# Supplementary material for: Subtypes of HPV-Positive Head and Neck Cancers Are Associated with HPV Characteristics, Copy Number Alterations, PIK3CA Mutation, and Pathway Signatures
Source: Oxford University Press journal article supplement (doi:10.1158/1078-0432.ccr-16-0323), 2016-04-18
Supplement: 10780432ccr160323-sup-159763_1_supp_3417007_x4x1xf.xlsx [file 10780432ccr160323-sup-159763_1_supp_3417007_x4x1xf.xlsx]

## Sheet: Table S1. Neoplasm_gene_exp_HPV
symbols	Gene2Mesh_Neoplams_counts	logFC	logCPM	LR	PValue	fdr	significant	Direction of change
TP53	25	1.36203	6.3392	20.7572	5.21e-06	4.98e-05	TRUE	up in HPV(+)
CDKN2A	19	3.11158	6.99488	37.2841	1.02e-09	3.67e-08	TRUE	up in HPV(+)
CCND1	11	-1.76889	7.41658	25.1683	5.25e-07	7.23e-06	TRUE	up in HPV(-)
FHIT	10	1.71811	0.539321	20.5233	5.89e-06	5.54e-05	TRUE	up in HPV(+)
GSTM1	10	-4.41899	4.2249	11.5698	0.000670329	0.00296279	TRUE	up in HPV(-)
BRCA2	9	1.10743	3.75446	16.4039	5.12e-05	0.000340139	TRUE	up in HPV(+)
HIF1A	8	-1.09899	6.60971	20.6926	5.39e-06	5.12e-05	TRUE	up in HPV(-)
MMP2	7	-2.33666	7.6193	35.5103	2.54e-09	8.06e-08	TRUE	up in HPV(-)
CD44	7	-1.25983	9.46026	33.5157	7.07e-09	1.93e-07	TRUE	up in HPV(-)
CYP2E1	6	2.93167	3.57981	40.9445	1.57e-10	6.97e-09	TRUE	up in HPV(+)
MET	6	-2.38907	6.35846	44.7346	2.26e-11	1.31e-09	TRUE	up in HPV(-)
TYMS	6	1.35917	4.69864	31.1145	2.43e-08	5.46e-07	TRUE	up in HPV(+)
VEGFC	6	-2.44416	3.01427	28.1914	1.1e-07	1.98e-06	TRUE	up in HPV(-)
KIT	5	1.64658	3.04223	12.3438	0.000442445	0.00210221	TRUE	up in HPV(+)
MMP7	5	-2.74595	5.10341	16.3462	5.28e-05	0.000348946	TRUE	up in HPV(-)
RARB	5	2.24712	2.63046	22.5764	2.02e-06	2.21e-05	TRUE	up in HPV(+)
BCL2	5	2.86082	4.74796	44.7246	2.27e-11	1.31e-09	TRUE	up in HPV(+)
ADH1C	4	2.52935	1.29794	5.54518	0.0185316	0.047206	TRUE	up in HPV(+)
NQO1	4	-1.86524	7.00115	18.1633	2.03e-05	0.000156305	TRUE	up in HPV(-)
BRMS1	4	-1.0793	6.37911	32.8961	9.72e-09	2.55e-07	TRUE	up in HPV(-)
KRT19	4	2.26734	10.1866	13.3041	0.000264824	0.00138172	TRUE	up in HPV(+)
MUC1	4	1.56624	6.05546	14.2072	0.000163742	0.000916061	TRUE	up in HPV(+)
PTHLH	4	-5.19329	7.61135	83.7712	5.55e-20	2.93e-17	TRUE	up in HPV(-)
PSCA	4	2.34002	3.59206	12.2738	0.000459366	0.00216384	TRUE	up in HPV(+)
CEACAM5	3	2.15362	6.10459	9.36711	0.00220914	0.00804109	TRUE	up in HPV(+)
DNMT3B	3	-1.33993	3.15299	21.7368	3.13e-06	3.19e-05	TRUE	up in HPV(-)
ESR1	3	1.92385	2.14502	15.1197	0.000100903	0.000605565	TRUE	up in HPV(+)
ETV4	3	-1.90401	4.5864	19.144	1.21e-05	0.000101758	TRUE	up in HPV(-)
FGFR3	3	1.11172	7.66541	11.4713	0.000706778	0.00309875	TRUE	up in HPV(+)
MUC2	3	2.88594	-1.6171	15.6393	7.66e-05	0.000479361	TRUE	up in HPV(+)
MYCN	3	2.91967	1.88682	33.1497	8.53e-09	2.27e-07	TRUE	up in HPV(+)
ABCB1	3	1.02961	0.735013	6.70254	0.00962757	0.0276311	TRUE	up in HPV(+)
PLAU	3	-1.23318	7.57735	12.4526	0.000417411	0.00200495	TRUE	up in HPV(-)
CD248	3	-1.753	4.17313	28.3948	9.89e-08	1.81e-06	TRUE	up in HPV(-)
SNAI1	3	-1.18954	1.60431	12.6607	0.000373422	0.00182696	TRUE	up in HPV(-)
CA12	3	-1.72148	7.20675	11.8124	0.000588379	0.00265592	TRUE	up in HPV(-)
CXCR4	3	2.28523	6.22804	29.2939	6.22e-08	1.22e-06	TRUE	up in HPV(+)
HMGA2	3	-3.77558	4.44178	33.1567	8.5e-09	2.26e-07	TRUE	up in HPV(-)
RECK	3	-1.01793	2.15635	8.18349	0.00422733	0.0139061	TRUE	up in HPV(-)
RUNX3	3	1.12721	5.45504	10.5262	0.00117697	0.00472988	TRUE	up in HPV(+)
CDH13	2	-2.83262	5.54111	51.4902	7.2e-13	6.03e-11	TRUE	up in HPV(-)
CD52	2	1.95895	4.30119	28.7719	8.14e-08	1.52e-06	TRUE	up in HPV(+)
HTATIP2	2	-1.08482	5.98407	25.6354	4.12e-07	5.93e-06	TRUE	up in HPV(-)
CEACAM7	2	2.87661	2.97863	10.2433	0.00137178	0.00537526	TRUE	up in HPV(+)
KLK11	2	-1.68017	5.21986	7.29562	0.00691228	0.0208839	TRUE	up in HPV(-)
CLDN3	2	3.96545	2.96654	25.0883	5.48e-07	7.49e-06	TRUE	up in HPV(+)
EZH2	2	1.07133	5.79983	22.7111	1.88e-06	2.1e-05	TRUE	up in HPV(+)
FAP	2	-2.67212	4.64379	38.0679	6.83e-10	2.56e-08	TRUE	up in HPV(-)
GAST	2	-3.96709	0.582446	29.6825	5.09e-08	1.03e-06	TRUE	up in HPV(-)
GSTM3	2	-1.43846	4.64739	8.34878	0.00385947	0.0128565	TRUE	up in HPV(-)
TNC	2	-3.23937	9.33654	49.6673	1.82e-12	1.42e-10	TRUE	up in HPV(-)
IGF2	2	-1.69812	-0.765915	9.72321	0.00181956	0.00683003	TRUE	up in HPV(-)
LAMC2	2	-1.73605	9.04306	21.1653	4.21e-06	4.13e-05	TRUE	up in HPV(-)
MAGEA3	2	-5.06894	3.98767	18.1387	2.05e-05	0.000157814	TRUE	up in HPV(-)
MAGEA4	2	-8.42423	5.13306	51.2474	8.14e-13	6.75e-11	TRUE	up in HPV(-)
MAGEA11	2	-6.82586	1.17165	32.2205	1.38e-08	3.41e-07	TRUE	up in HPV(-)
MAGEA12	2	-6.94835	0.96891	20.6323	5.56e-06	5.26e-05	TRUE	up in HPV(-)
MAGEB2	2	-7.11746	-0.55341	29.6422	5.2e-08	1.04e-06	TRUE	up in HPV(-)
MFI2	2	1.15149	5.12445	12.9728	0.000316055	0.00159996	TRUE	up in HPV(+)
MME	2	-1.87752	2.77462	16.6362	4.53e-05	0.000307935	TRUE	up in HPV(-)
MMP1	2	-5.09902	8.04489	67.9532	1.67e-16	3.75e-14	TRUE	up in HPV(-)
MMP3	2	-4.42464	5.3739	65.6157	5.48e-16	1.03e-13	TRUE	up in HPV(-)
MUC4	2	4.16936	6.89298	27.8713	1.3e-07	2.28e-06	TRUE	up in HPV(+)
UGT1A10	2	-4.37427	-0.804682	13.1415	0.000288831	0.00148467	TRUE	up in HPV(-)
BARD1	2	1.30565	2.70672	25.2647	5e-07	6.94e-06	TRUE	up in HPV(+)
FSCN1	2	-1.27218	8.79877	21.5527	3.44e-06	3.46e-05	TRUE	up in HPV(-)
SPARC	2	-1.60984	9.41835	15.9366	6.55e-05	0.000417798	TRUE	up in HPV(-)
NKX2-1	2	-4.9228	-0.432131	23.2037	1.46e-06	1.69e-05	TRUE	up in HPV(-)
TP73	2	1.4392	5.38203	28.8985	7.63e-08	1.44e-06	TRUE	up in HPV(+)
TWIST1	2	-1.1963	3.1553	8.90582	0.00284263	0.00998863	TRUE	up in HPV(-)
ABCC3	2	-1.76879	4.25986	24.7712	6.46e-07	8.57e-06	TRUE	up in HPV(-)
NAT1	2	1.14357	2.63058	13.4084	0.000250496	0.00131748	TRUE	up in HPV(+)
CDH2	1	-2.65434	1.65015	22.0133	2.71e-06	2.83e-05	TRUE	up in HPV(-)
CDH11	1	-1.94618	5.22965	19.8413	8.41e-06	7.47e-05	TRUE	up in HPV(-)
TSHZ1	1	1.18309	4.52403	31.6036	1.89e-08	4.47e-07	TRUE	up in HPV(+)
SEMA3A	1	-2.03986	2.36184	16.281	5.46e-05	0.000358989	TRUE	up in HPV(-)
TUBB3	1	-2.79878	5.60979	47.3111	6.06e-12	4.12e-10	TRUE	up in HPV(-)
DLC1	1	-1.00923	3.59512	9.4245	0.00214105	0.00784873	TRUE	up in HPV(-)
WFDC2	1	3.09461	4.46729	24.306	8.22e-07	1.04e-05	TRUE	up in HPV(+)
HOXB13	1	3.8137	2.57956	17.5383	2.82e-05	0.000205994	TRUE	up in HPV(+)
POSTN	1	-2.13614	7.27482	14.7368	0.000123607	0.000719875	TRUE	up in HPV(-)
MLLT11	1	-1.14377	3.30187	8.90669	0.00284128	0.00998606	TRUE	up in HPV(-)
FERMT2	1	-1.96693	4.19626	30.1436	4.01e-08	8.37e-07	TRUE	up in HPV(-)
GLIPR1	1	-1.22726	4.76814	15.1499	9.93e-05	0.000598172	TRUE	up in HPV(-)
WIF1	1	-4.07915	-0.896353	9.07675	0.0025888	0.00923578	TRUE	up in HPV(-)
KLK8	1	-3.79951	4.94798	31.5261	1.97e-08	4.63e-07	TRUE	up in HPV(-)
FAM129A	1	1.30892	6.28977	23.4203	1.3e-06	1.54e-05	TRUE	up in HPV(+)
CLU	1	1.07737	6.41232	8.23364	0.0041121	0.013568	TRUE	up in HPV(+)
CCR7	1	2.08113	3.22547	21.4551	3.62e-06	3.62e-05	TRUE	up in HPV(+)
ABCC2	1	-1.31655	0.166879	15.7816	7.11e-05	0.000449254	TRUE	up in HPV(-)
COL4A6	1	-4.47464	3.89825	73.2353	1.15e-17	3.67e-15	TRUE	up in HPV(-)
CD109	1	-1.17239	6.92623	18.9682	1.33e-05	0.000109278	TRUE	up in HPV(-)
CLDN4	1	1.59371	7.62121	13.0677	0.000300426	0.00153607	TRUE	up in HPV(+)
CRMP1	1	-1.12925	3.59145	5.96009	0.0146333	0.0386678	TRUE	up in HPV(-)
CSPG4	1	-2.87078	6.15929	31.2544	2.26e-08	5.14e-07	TRUE	up in HPV(-)
CST6	1	-2.29588	2.53135	13.6487	0.000220392	0.00117966	TRUE	up in HPV(-)
DNMT1	1	1.1132	7.04055	39.0273	4.18e-10	1.66e-08	TRUE	up in HPV(+)
DUSP6	1	-1.3925	6.34188	24.0884	9.2e-07	1.15e-05	TRUE	up in HPV(-)
EEF1A2	1	-4.27205	2.53949	36.5096	1.52e-09	5.2e-08	TRUE	up in HPV(-)
EGF	1	-2.69251	-0.318809	21.17	4.2e-06	4.12e-05	TRUE	up in HPV(-)
ZBTB7C	1	1.33555	5.47369	9.0515	0.0026248	0.00933565	TRUE	up in HPV(+)
CTTN	1	-1.48415	8.00561	44.9673	2e-11	1.17e-09	TRUE	up in HPV(-)
SLC29A1	1	-1.07498	5.2396	26.906	2.14e-07	3.41e-06	TRUE	up in HPV(-)
F3	1	-2.54962	7.04056	25.5813	4.24e-07	6.06e-06	TRUE	up in HPV(-)
FABP4	1	-3.72976	1.61053	32.5727	1.15e-08	2.93e-07	TRUE	up in HPV(-)
FABP5	1	-1.49387	10.6729	8.15507	0.0042941	0.0140663	TRUE	up in HPV(-)
ACSL4	1	-1.05789	6.14171	20.2942	6.64e-06	6.13e-05	TRUE	up in HPV(-)
ORAOV1	1	-1.17122	4.66172	22.8284	1.77e-06	2e-05	TRUE	up in HPV(-)
FHL2	1	-1.43621	6.33243	22.4027	2.21e-06	2.39e-05	TRUE	up in HPV(-)
KLRK1	1	2.82638	-1.88685	23.4831	1.26e-06	1.5e-05	TRUE	up in HPV(+)
DKK1	1	-1.97647	4.04058	10.3472	0.00129669	0.00514019	TRUE	up in HPV(-)
PALLD	1	-1.24879	7.77923	24.5736	7.15e-07	9.33e-06	TRUE	up in HPV(-)
PEG10	1	-1.72675	3.16751	7.49741	0.00617877	0.0190123	TRUE	up in HPV(-)
FLT3	1	1.6362	0.33377	12.7271	0.000360403	0.00177657	TRUE	up in HPV(+)
FN1	1	-2.41162	9.32096	22.3434	2.28e-06	2.45e-05	TRUE	up in HPV(-)
ALOX15	1	2.09054	-0.19052	7.02281	0.00804777	0.0237265	TRUE	up in HPV(+)
GATA4	1	-4.71548	-1.58673	16.9619	3.81e-05	0.000265901	TRUE	up in HPV(-)
GFRA1	1	1.342	1.47526	5.61253	0.0178325	0.0457748	TRUE	up in HPV(+)
GPC3	1	-3.44972	4.21285	24.4358	7.68e-07	9.87e-06	TRUE	up in HPV(-)
GLI1	1	-3.15432	1.35943	37.3356	9.95e-10	3.6e-08	TRUE	up in HPV(-)
GLI2	1	-2.75768	2.93863	31.2881	2.22e-08	5.07e-07	TRUE	up in HPV(-)
MAT2B	1	1.02344	6.69822	34.9563	3.37e-09	1.03e-07	TRUE	up in HPV(+)
GSDMA	1	-3.08972	1.10017	31.8203	1.69e-08	4.09e-07	TRUE	up in HPV(-)
LAMA1	1	-3.52526	2.6606	22.9104	1.7e-06	1.92e-05	TRUE	up in HPV(-)
CAGE1	1	-1.11024	-0.506521	7.36967	0.00663332	0.0201942	TRUE	up in HPV(-)
UHRF1	1	1.10306	6.59951	27.5546	1.53e-07	2.59e-06	TRUE	up in HPV(+)
GRP	1	-3.16691	0.515014	17.0723	3.6e-05	0.000253265	TRUE	up in HPV(-)
CARD10	1	-1.16662	5.50486	10.004	0.001562	0.00600677	TRUE	up in HPV(-)
PNMA3	1	3.44418	1.90754	41.1841	1.39e-10	6.25e-09	TRUE	up in HPV(+)
SH3KBP1	1	1.07513	4.73583	11.8406	0.000579544	0.00262386	TRUE	up in HPV(+)
NRG1	1	-2.45323	3.66743	33.8632	5.91e-09	1.67e-07	TRUE	up in HPV(-)
HLA-DQB1	1	1.91233	5.89424	17.1139	3.52e-05	0.000248421	TRUE	up in HPV(+)
HLA-DRB1	1	1.82914	7.37301	22.2355	2.41e-06	2.57e-05	TRUE	up in HPV(+)
FOXA1	1	3.65277	4.87022	63.5369	1.57e-15	2.71e-13	TRUE	up in HPV(+)
BIRC3	1	2.24193	6.4389	22.3796	2.24e-06	2.42e-05	TRUE	up in HPV(+)
IBSP	1	-2.93154	0.207048	33.7579	6.24e-09	1.74e-07	TRUE	up in HPV(-)
FAS	1	1.36201	5.06935	22.9783	1.64e-06	1.87e-05	TRUE	up in HPV(+)
IL8	1	-1.02033	4.54001	5.57504	0.0182183	0.0465604	TRUE	up in HPV(-)
IRF1	1	1.02535	7.02316	13.5535	0.000231863	0.00123098	TRUE	up in HPV(+)
ITGA3	1	-1.00477	7.91399	10.2005	0.00140402	0.00547922	TRUE	up in HPV(-)
KRT7	1	3.61706	6.24267	32.9806	9.31e-09	2.44e-07	TRUE	up in HPV(+)
LIG1	1	1.41643	6.10487	64.1193	1.17e-15	2.04e-13	TRUE	up in HPV(+)
BCAM	1	-1.742	6.5613	22.4715	2.13e-06	2.32e-05	TRUE	up in HPV(-)
LYL1	1	1.16753	1.86604	11.8438	0.000578549	0.00262096	TRUE	up in HPV(+)
TACSTD2	1	1.48208	10.273	12.0604	0.000515031	0.00238412	TRUE	up in HPV(+)
MC1R	1	-1.03463	2.89855	8.86752	0.0029029	0.0101633	TRUE	up in HPV(-)
MEIS1	1	1.95375	4.92438	57.5385	3.31e-14	3.76e-12	TRUE	up in HPV(+)
MMP11	1	-2.45688	7.11984	23.6887	1.13e-06	1.37e-05	TRUE	up in HPV(-)
TARP	1	2.42324	1.34469	30.763	2.92e-08	6.38e-07	TRUE	up in HPV(+)
MST1R	1	1.08828	5.64501	14.3701	0.000150165	0.000848825	TRUE	up in HPV(+)
MYH1	1	-8.08885	2.37059	37.2544	1.04e-09	3.71e-08	TRUE	up in HPV(-)
NOP2	1	-1.09603	6.39495	37.3494	9.88e-10	3.58e-08	TRUE	up in HPV(-)
NOS2	1	5.23392	3.51152	43.8472	3.55e-11	1.91e-09	TRUE	up in HPV(+)
NOTCH1	1	1.12787	6.95603	32.4146	1.25e-08	3.15e-07	TRUE	up in HPV(+)
OCA2	1	3.48281	1.59826	25.2585	5.01e-07	6.96e-06	TRUE	up in HPV(+)
2015-12-01	1	-3.9647	-2.46679	22.4415	2.17e-06	2.35e-05	TRUE	up in HPV(-)
PAX3	1	-2.68354	-1.28147	15.2569	9.38e-05	0.000568563	TRUE	up in HPV(-)
PBX1	1	1.8702	5.91365	46.8248	7.76e-12	5.03e-10	TRUE	up in HPV(+)
FOXP3	1	1.21751	3.17519	11.2035	0.000816434	0.00349074	TRUE	up in HPV(+)
TNFRSF12A	1	-2.48777	6.76974	74.9799	4.76e-18	1.69e-15	TRUE	up in HPV(-)
PDGFB	1	-2.03669	4.13027	47.4299	5.7e-12	3.96e-10	TRUE	up in HPV(-)
ATP7B	1	-1.64757	0.933148	21.2967	3.93e-06	3.9e-05	TRUE	up in HPV(-)
POU4F1	1	3.05232	1.11736	25.8348	3.72e-07	5.47e-06	TRUE	up in HPV(+)
POU5F1	1	1.27974	1.57828	12.295	0.000454178	0.00214249	TRUE	up in HPV(+)
ANO1	1	-2.60515	7.17829	30.9067	2.71e-08	6e-07	TRUE	up in HPV(-)
TRPV6	1	2.03574	1.38136	18.9137	1.37e-05	0.000111709	TRUE	up in HPV(+)
DDX43	1	1.86391	-0.0750108	7.84252	0.00510313	0.0161779	TRUE	up in HPV(+)
IL17RB	1	3.86008	3.44897	78.3551	8.61e-19	3.43e-16	TRUE	up in HPV(+)
KLK6	1	-2.18947	3.15283	11.7357	0.000613127	0.00274864	TRUE	up in HPV(-)
KLK10	1	-3.35737	7.25553	27.096	1.94e-07	3.17e-06	TRUE	up in HPV(-)
C8orf4	1	1.97764	5.05374	12.7196	0.000361844	0.00178152	TRUE	up in HPV(+)
PMEPA1	1	-2.31892	6.87648	38.8914	4.48e-10	1.77e-08	TRUE	up in HPV(-)
PTGS1	1	-2.30052	5.03804	27.7096	1.41e-07	2.42e-06	TRUE	up in HPV(-)
PTH1R	1	-1.42129	-0.172478	9.40706	0.00216152	0.00790476	TRUE	up in HPV(-)
PXN	1	-1.061	6.92594	20.2202	6.9e-06	6.33e-05	TRUE	up in HPV(-)
RNASEL	1	1.11493	3.8701	24.9127	6e-07	8.07e-06	TRUE	up in HPV(+)
S100A7	1	-2.39931	8.18097	10.3749	0.0012774	0.00507356	TRUE	up in HPV(-)
CEACAM1	1	2.05568	4.69275	30.8107	2.84e-08	6.26e-07	TRUE	up in HPV(+)
SELPLG	1	1.29736	3.8834	16.8721	4e-05	0.000276892	TRUE	up in HPV(+)
SFRP1	1	-2.0596	4.4098	9.26613	0.0023343	0.00844026	TRUE	up in HPV(-)
TMPRSS3	1	2.03492	1.10266	18.2541	1.93e-05	0.000149803	TRUE	up in HPV(+)
SNAI2	1	-1.48008	6.04651	33.6187	6.7e-09	1.85e-07	TRUE	up in HPV(-)
SOX2	1	1.28411	6.517	11.3789	0.000742844	0.00323258	TRUE	up in HPV(+)
SPINK1	1	-2.44267	-2.17235	15.3978	8.71e-05	0.000535042	TRUE	up in HPV(-)
TGFA	1	-1.26126	5.65836	17.7806	2.48e-05	0.000185356	TRUE	up in HPV(-)
TGFB1I1	1	-1.22105	3.90161	20.0023	7.74e-06	6.97e-05	TRUE	up in HPV(-)
TGFBI	1	-3.05645	8.75295	52.5031	4.3e-13	3.79e-11	TRUE	up in HPV(-)
TGFBR2	1	-1.3481	5.73655	19.2999	1.12e-05	9.49e-05	TRUE	up in HPV(-)
TH	1	-3.88228	-1.21155	29.2948	6.22e-08	1.22e-06	TRUE	up in HPV(-)
TIMP2	1	-1.56994	7.00814	17.617	2.7e-05	0.000199343	TRUE	up in HPV(-)
TIMP3	1	-2.31676	6.95241	41.049	1.48e-10	6.66e-09	TRUE	up in HPV(-)
TMPRSS2	1	4.464	4.831	61.6733	4.05e-15	5.86e-13	TRUE	up in HPV(+)
TSHR	1	1.56809	-1.74644	5.82172	0.0158294	0.0413809	TRUE	up in HPV(+)
TYRP1	1	-2.99361	-0.676383	15.8346	6.91e-05	0.000438383	TRUE	up in HPV(-)
UBA7	1	1.32237	5.59341	24.2669	8.39e-07	1.06e-05	TRUE	up in HPV(+)
UPK1B	1	-4.76091	4.62024	22.6479	1.95e-06	2.15e-05	TRUE	up in HPV(-)
WNT2	1	-1.79447	1.65474	11.0837	0.000870906	0.00367721	TRUE	up in HPV(-)
PTP4A1	1	-1.34007	7.58123	33.648	6.6e-09	1.83e-07	TRUE	up in HPV(-)
FOSL1	1	-2.93416	6.04738	71.4423	2.85e-17	8.04e-15	TRUE	up in HPV(-)
FERMT3	1	1.16653	4.40472	13.7476	0.000209091	0.00112804	TRUE	up in HPV(+)
BRIP1	1	1.03568	4.71504	22.9526	1.66e-06	1.89e-05	TRUE	up in HPV(+)
PRAM1	1	1.73856	0.802344	16.211	5.67e-05	0.000369824	TRUE	up in HPV(+)
CARD11	1	1.2357	3.31521	9.00737	0.00268893	0.00952435	TRUE	up in HPV(+)
SLC45A3	1	-1.10008	2.20517	12.7359	0.000358694	0.00176974	TRUE	up in HPV(-)
CAV1	1	-2.81588	7.81506	63.4827	1.62e-15	2.75e-13	TRUE	up in HPV(-)
TNFRSF11A	1	1.89843	1.68382	29.9944	4.33e-08	8.96e-07	TRUE	up in HPV(+)
NRP2	1	-1.17817	5.63229	22.6551	1.94e-06	2.15e-05	TRUE	up in HPV(-)
IER3	1	-1.99417	7.37997	36.5305	1.5e-09	5.16e-08	TRUE	up in HPV(-)
CCND2	1	-1.15568	6.74727	8.61738	0.00332971	0.0113938	TRUE	up in HPV(-)
CLDN1	1	1.61373	8.66691	24.1556	8.89e-07	1.12e-05	TRUE	up in HPV(+)
UBXN11	1	1.43788	4.43441	37.0572	1.15e-09	4.05e-08	TRUE	up in HPV(+)
MUC16	1	4.23369	3.99	67.1775	2.48e-16	5e-14	TRUE	up in HPV(+)
TNFRSF8	1	1.20541	0.726839	8.63398	0.0032995	0.0113118	TRUE	up in HPV(+)
CD37	1	2.05088	3.66658	26.2191	3.05e-07	4.64e-06	TRUE	up in HPV(+)
GDF15	1	1.77876	2.01163	13.0115	0.000309577	0.00157253	TRUE	up in HPV(+)
KLK4	1	-3.62243	-1.82069	22.1729	2.49e-06	2.64e-05	TRUE	up in HPV(-)
CD53	1	1.83588	4.93314	23.935	9.96e-07	1.22e-05	TRUE	up in HPV(+)
CD151	1	-1.20541	7.37505	27.8542	1.31e-07	2.29e-06	TRUE	up in HPV(-)
EGFR	14	-0.266067	6.18467	0.915047	0.338779	0.463431	FALSE	up in HPV(-)
PTEN	14	-0.130694	6.56943	0.604757	0.436769	0.562125	FALSE	up in HPV(-)
PTGS2	13	-1.06839	4.41052	4.47706	0.0343528	0.0775657	FALSE	up in HPV(-)
CDH1	13	-0.325571	8.57786	1.50533	0.219853	0.33528	FALSE	up in HPV(-)
ERBB2	12	0.29111	7.19651	2.33616	0.126401	0.218993	FALSE	up in HPV(+)
VEGFA	12	0.251357	7.44251	1.02124	0.312224	0.435605	FALSE	up in HPV(+)
BIRC5	11	-0.30204	6.16885	2.66365	0.102665	0.185068	FALSE	up in HPV(-)
GSTP1	10	-0.795868	9.9602	10.1179	0.00146833	0.00569212	FALSE	up in HPV(-)
MLH1	10	0.615298	5.09569	15.3615	8.88e-05	0.000544223	FALSE	up in HPV(+)
XRCC1	10	0.904887	5.67722	34.8051	3.64e-09	1.1e-07	FALSE	up in HPV(+)
CDKN1B	9	0.538033	6.1799	7.2545	0.00707237	0.0212891	FALSE	up in HPV(+)
CTNNB1	9	0.0181267	8.28469	0.00729585	0.931931	0.955143	FALSE	up in HPV(+)
GSTT1	9	-0.0403726	3.81703	0.00660892	0.935207	0.957628	FALSE	up in HPV(-)
ERCC1	8	-0.206909	5.59989	1.73355	0.187958	0.297675	FALSE	up in HPV(-)
KRAS	8	-0.599211	6.11302	8.87926	0.00288428	0.0101154	FALSE	up in HPV(-)
MSH2	8	0.741822	5.76106	18.1076	2.09e-05	0.000160039	FALSE	up in HPV(+)
SERPINB5	8	-0.880642	8.62704	5.12088	0.0236397	0.0574669	FALSE	up in HPV(-)
CA9	8	-1.06507	4.11735	5.03193	0.0248842	0.0598423	FALSE	up in HPV(-)
RASSF1	7	0.719253	5.18351	18.3332	1.85e-05	0.000144534	FALSE	up in HPV(+)
ERCC2	7	-0.289319	3.87908	1.9887	0.158476	0.261054	FALSE	up in HPV(-)
MSH6	7	0.666342	6.53872	16.2905	5.43e-05	0.000357635	FALSE	up in HPV(+)
MGMT	7	0.102592	4.63892	0.255864	0.612976	0.714082	FALSE	up in HPV(+)
BRAF	7	-0.464119	2.78813	3.61677	0.0571998	0.116221	FALSE	up in HPV(-)
AURKA	7	-0.233369	5.27921	1.34564	0.246041	0.365493	FALSE	up in HPV(-)
TERT	7	0.863758	0.527297	3.15886	0.075516	0.144792	FALSE	up in HPV(+)
XRCC3	7	0.168614	5.0371	0.503811	0.47783	0.599895	FALSE	up in HPV(+)
PIK3CA	6	0.0416368	4.73182	0.0375196	0.846411	0.895819	FALSE	up in HPV(+)
BRCA1	6	0.833646	4.97102	15.8204	6.96e-05	0.000441162	FALSE	up in HPV(+)
MDM2	5	0.77079	6.82529	16.656	4.48e-05	0.000305382	FALSE	up in HPV(+)
MEN1	5	-0.317625	5.55979	3.52374	0.0604958	0.121125	FALSE	up in HPV(-)
SERPINB3	5	-1.26215	6.49726	3.75635	0.0526073	0.108509	FALSE	up in HPV(-)
MTA1	5	-0.727575	6.05865	15.4731	8.37e-05	0.000517789	FALSE	up in HPV(-)
ABCG2	5	-0.0818252	0.706302	0.0502269	0.822669	0.877758	FALSE	up in HPV(-)
CDKN1A	4	-0.176486	7.86761	0.464568	0.495497	0.616202	FALSE	up in HPV(-)
HPSE	4	0.0854224	4.03858	0.121766	0.727126	0.80542	FALSE	up in HPV(+)
PTP4A3	4	0.237493	4.29397	0.843217	0.358478	0.483736	FALSE	up in HPV(+)
CHEK2	4	0.120563	4.65569	0.447799	0.503382	0.622926	FALSE	up in HPV(+)
CYP1B1	4	1.23073	3.17673	4.99027	0.0254903	0.0610392	FALSE	up in HPV(+)
DPYD	4	0.825694	4.96929	5.20242	0.0225555	0.0553586	FALSE	up in HPV(+)
APC	4	0.614377	5.03957	11.9435	0.000548381	0.00251047	FALSE	up in HPV(+)
HRAS	4	-0.985715	6.27973	27.0438	1.99e-07	3.23e-06	FALSE	up in HPV(-)
CD82	4	0.458886	6.74093	3.94743	0.0469429	0.0993084	FALSE	up in HPV(+)
MKI67	4	0.514945	7.4707	8.15187	0.00430168	0.014077	FALSE	up in HPV(+)
MMP9	4	-0.471506	6.28403	1.57185	0.209938	0.32392	FALSE	up in HPV(-)
MUTYH	4	0.405037	4.13203	3.82996	0.0503442	0.104914	FALSE	up in HPV(+)
OGG1	4	0.778969	3.59855	17.8089	2.44e-05	0.000183279	FALSE	up in HPV(+)
PGR	4	-0.212813	-0.845913	0.146089	0.702301	0.786217	FALSE	up in HPV(-)
PMS2	4	-0.148491	3.3595	0.487985	0.484828	0.606304	FALSE	up in HPV(-)
SPP1	4	-0.106637	5.30156	0.062456	0.802655	0.863609	FALSE	up in HPV(-)
TP63	4	-0.407751	9.18491	2.07796	0.14944	0.249039	FALSE	up in HPV(-)
PTTG1	4	0.446751	6.36463	5.70958	0.0168726	0.0436608	FALSE	up in HPV(+)
MSLN	3	0.689479	4.53864	0.964268	0.326114	0.450368	FALSE	up in HPV(+)
IGF2BP3	3	0.378573	5.1799	1.00023	0.317256	0.44093	FALSE	up in HPV(+)
KLF6	3	-0.321835	7.4783	1.36026	0.243492	0.36263	FALSE	up in HPV(-)
DCC	3	1.03593	-1.53377	2.84794	0.091491	0.168805	FALSE	up in HPV(+)
TYMP	3	-0.142158	8.70024	0.228243	0.63283	0.731163	FALSE	up in HPV(-)
EPHA2	3	-0.0251566	7.12795	0.00552995	0.940721	0.960907	FALSE	up in HPV(-)
AKT1	3	-0.617686	7.31173	11.3936	0.000736978	0.00321047	FALSE	up in HPV(-)
FH	3	-0.0128778	6.13501	0.00614186	0.937534	0.959129	FALSE	up in HPV(-)
IGF1R	3	-0.904326	6.70088	20.9072	4.82e-06	4.66e-05	FALSE	up in HPV(-)
ITGAV	3	-0.466193	7.99803	2.82508	0.0928024	0.170781	FALSE	up in HPV(-)
LGALS3	3	-0.392577	7.74273	3.56538	0.0589962	0.118851	FALSE	up in HPV(-)
EPCAM	3	-0.574001	6.39519	2.23926	0.134546	0.230054	FALSE	up in HPV(-)
SMAD4	3	0.679558	6.09144	16.4985	4.87e-05	0.00032665	FALSE	up in HPV(+)
CTAGE5	3	0.0899768	5.45018	0.252467	0.615343	0.716235	FALSE	up in HPV(+)
MLL	3	0.112653	5.83331	0.37822	0.538557	0.652755	FALSE	up in HPV(+)
MMP14	3	-0.545975	8.47044	5.32966	0.0209655	0.0520821	FALSE	up in HPV(-)
NRAS	3	-0.0546212	6.62882	0.0832309	0.772966	0.840935	FALSE	up in HPV(-)
PHF20	3	0.216596	5.28865	1.8651	0.172037	0.278285	FALSE	up in HPV(+)
PPARG	3	-0.521761	1.02247	1.1281	0.288181	0.410868	FALSE	up in HPV(-)
XAF1	3	-0.754835	6.86205	7.19846	0.00729663	0.0218631	FALSE	up in HPV(-)
C11orf30	3	0.704132	4.1284	10.3487	0.00129566	0.0051386	FALSE	up in HPV(+)
BAX	3	0.114589	5.75027	0.624002	0.429564	0.555083	FALSE	up in HPV(+)
RET	3	0.247134	2.00228	0.142002	0.706299	0.789128	FALSE	up in HPV(+)
S100A4	3	-0.011128	5.86461	0.00225716	0.962107	0.975301	FALSE	up in HPV(-)
CXCL12	3	0.766678	4.65495	2.9517	0.0857873	0.160529	FALSE	up in HPV(+)
SDHB	3	-0.0294298	6.291	0.0360486	0.849415	0.898126	FALSE	up in HPV(-)
PMEL	3	0.144938	0.942543	0.148635	0.699843	0.784239	FALSE	up in HPV(+)
SNCG	3	0.506176	3.23396	1.20571	0.272183	0.393738	FALSE	up in HPV(+)
SULT1A1	3	0.576643	2.78884	3.14564	0.0761302	0.145833	FALSE	up in HPV(+)
BSG	3	0.0400968	8.90565	0.0380125	0.845418	0.895068	FALSE	up in HPV(+)
UMPS	3	-0.20918	6.04896	1.06211	0.302735	0.426224	FALSE	up in HPV(-)
VHL	3	0.948128	6.15176	45.7859	1.32e-11	8.07e-10	FALSE	up in HPV(+)
TNFSF10	3	-0.00843652	7.85099	0.000750801	0.97814	0.985622	FALSE	up in HPV(-)
MVP	3	-0.393878	7.3951	3.53876	0.0599503	0.120446	FALSE	up in HPV(-)
CDX1	2	-0.373542	-0.573276	0.789518	0.374246	0.500097	FALSE	up in HPV(-)
VAT1	2	-0.746462	6.12373	13.4866	0.000240271	0.0012696	FALSE	up in HPV(-)
MALT1	2	0.157703	5.5306	0.862993	0.352902	0.477967	FALSE	up in HPV(+)
NACC1	2	-0.387384	6.56939	6.21759	0.0126487	0.0345245	FALSE	up in HPV(-)
EPHX1	2	0.254447	5.6432	0.993914	0.318788	0.442682	FALSE	up in HPV(+)
ERBB3	2	0.804396	6.75197	9.34116	0.00224064	0.0081332	FALSE	up in HPV(+)
ERCC5	2	0.248734	0.333595	1.01474	0.313771	0.437128	FALSE	up in HPV(+)
ALDH2	2	0.8559	7.22371	6.75292	0.00935944	0.0270086	FALSE	up in HPV(+)
JAZF1	2	0.271495	3.53163	0.667394	0.413962	0.539832	FALSE	up in HPV(+)
FGFR4	2	-0.417188	1.85477	1.15911	0.28165	0.40367	FALSE	up in HPV(-)
FOLH1	2	-0.895332	0.705298	4.09106	0.0431106	0.0927312	FALSE	up in HPV(-)
SUZ12	2	0.521732	6.22253	9.37985	0.00219383	0.00799787	FALSE	up in HPV(+)
SLC39A6	2	0.127341	6.78532	0.318224	0.572677	0.679887	FALSE	up in HPV(+)
GALNT3	2	-0.880924	6.07973	9.88952	0.00166222	0.00633405	FALSE	up in HPV(-)
STEAP2	2	0.344781	4.14394	1.51096	0.218993	0.33428	FALSE	up in HPV(+)
MLH3	2	0.111392	4.07861	0.388075	0.533313	0.648291	FALSE	up in HPV(+)
MAGEH1	2	-0.650018	3.11458	4.65559	0.0309527	0.0714084	FALSE	up in HPV(-)
DNAJC15	2	-0.28933	4.80262	0.703248	0.401694	0.527541	FALSE	up in HPV(-)
DSE	2	-0.178448	5.67682	0.386133	0.534339	0.649311	FALSE	up in HPV(-)
HGF	2	-0.00597521	-0.906856	0.000171771	0.989543	0.993191	FALSE	up in HPV(-)
HMMR	2	0.300646	4.65887	1.62219	0.202786	0.315166	FALSE	up in HPV(+)
XIAP	2	0.0204727	5.95986	0.0218689	0.882436	0.92094	FALSE	up in HPV(+)
IGF1	2	-0.00818715	1.13021	0.000343494	0.985213	0.990342	FALSE	up in HPV(-)
IGFBP3	2	-0.792315	7.57262	5.3119	0.0211802	0.0525223	FALSE	up in HPV(-)
IL10	2	0.340747	-0.446434	0.577051	0.447471	0.571604	FALSE	up in HPV(+)
AR	2	0.695269	0.68063	1.44069	0.230027	0.346589	FALSE	up in HPV(+)
RHOA	2	0.045866	8.69755	0.0720708	0.788345	0.853088	FALSE	up in HPV(+)
RHOC	2	-0.079987	7.53693	0.126559	0.722027	0.80162	FALSE	up in HPV(-)
LASP1	2	-0.195404	7.66225	1.29465	0.255193	0.375115	FALSE	up in HPV(-)
MAGEA1	2	2.56996	1.14782	2.85832	0.0909026	0.16799	FALSE	up in HPV(+)
MAGEA10	2	-1.57027	-2.48026	2.13479	0.14399	0.241974	FALSE	up in HPV(-)
MGAT5	2	-0.01559	5.83102	0.00612825	0.937603	0.959129	FALSE	up in HPV(-)
ABCC1	2	-0.765313	7.09612	6.55716	0.0104463	0.0295345	FALSE	up in HPV(-)
MSH3	2	0.729637	4.2145	14.6488	0.000129516	0.00074815	FALSE	up in HPV(+)
MTHFR	2	0.70451	4.75005	12.3416	0.00044298	0.00210314	FALSE	up in HPV(+)
MYC	2	-0.629719	7.36184	7.12797	0.00758905	0.0225588	FALSE	up in HPV(-)
CEACAM6	2	1.10119	5.82831	2.93168	0.0868572	0.162104	FALSE	up in HPV(+)
ATM	2	0.372675	5.35215	2.87354	0.0900469	0.1668	FALSE	up in HPV(+)
NF2	2	-0.370969	5.32335	6.31686	0.0119595	0.0330018	FALSE	up in HPV(-)
NOVA1	2	1.23194	0.997817	4.38966	0.0361576	0.0807699	FALSE	up in HPV(+)
PDGFRA	2	-0.453913	4.34163	1.11391	0.291234	0.414193	FALSE	up in HPV(-)
WWOX	2	0.410599	3.22078	2.94009	0.086406	0.161484	FALSE	up in HPV(+)
PLAUR	2	-0.50033	5.44531	3.14851	0.0759961	0.145627	FALSE	up in HPV(-)
PMS1	2	0.480762	4.31824	9.91056	0.00164334	0.00627232	FALSE	up in HPV(+)
UGT1A7	2	1.2001	1.58659	1.64462	0.199692	0.311901	FALSE	up in HPV(+)
PRCC	2	-0.147552	6.35139	1.157	0.282089	0.404052	FALSE	up in HPV(-)
PTK2	2	0.166633	6.91671	0.822138	0.364556	0.490316	FALSE	up in HPV(+)
ELAC2	2	-0.321187	6.27945	6.25706	0.01237	0.0339167	FALSE	up in HPV(-)
RRM1	2	0.342904	7.13971	3.48906	0.0617756	0.123135	FALSE	up in HPV(+)
S100P	2	0.85265	4.88464	1.97386	0.160039	0.262865	FALSE	up in HPV(+)
SERPINB4	2	-0.789416	5.02485	1.17497	0.278383	0.400217	FALSE	up in HPV(-)
SDC1	2	-0.533323	9.68575	3.61489	0.0572646	0.11628	FALSE	up in HPV(-)
SDHC	2	-0.0230197	6.70585	0.0195048	0.888929	0.925721	FALSE	up in HPV(-)
SDHD	2	-0.507596	6.56784	7.14316	0.00752504	0.0224241	FALSE	up in HPV(-)
CDCP1	2	0.0706822	6.99802	0.0572638	0.810874	0.869588	FALSE	up in HPV(+)
SOD2	2	0.0136435	6.82414	0.00217967	0.962763	0.97561	FALSE	up in HPV(+)
SSTR2	2	0.986173	-0.114207	3.30822	0.0689341	0.134637	FALSE	up in HPV(+)
STAT3	2	0.446004	7.93692	5.1192	0.0236625	0.0575138	FALSE	up in HPV(+)
TCF7L2	2	-0.346071	4.51634	3.42808	0.0640967	0.126928	FALSE	up in HPV(-)
TFE3	2	-0.317257	5.86992	4.02743	0.0447661	0.0955821	FALSE	up in HPV(-)
TIAM1	2	0.7713	5.48143	14.0999	0.000173351	0.000959748	FALSE	up in HPV(+)
TNF	2	0.977011	2.46487	6.16381	0.013039	0.035336	FALSE	up in HPV(+)
TOP2A	2	0.590684	7.70585	7.11508	0.00764381	0.0226952	FALSE	up in HPV(+)
TPBG	2	-0.679818	6.43048	8.27978	0.00400889	0.0132784	FALSE	up in HPV(-)
TPD52	2	0.430971	7.18224	3.7713	0.0521391	0.107788	FALSE	up in HPV(+)
TPD52L1	2	-0.846332	6.05515	4.78723	0.0286715	0.0671317	FALSE	up in HPV(-)
VDR	2	-0.925488	5.47998	15.9956	6.35e-05	0.000407374	FALSE	up in HPV(-)
EZR	2	-0.424979	8.87593	4.10894	0.042657	0.0920413	FALSE	up in HPV(-)
WNT5A	2	-0.839846	6.2343	6.65213	0.00990373	0.0282552	FALSE	up in HPV(-)
XPA	2	-0.36475	4.10784	3.25026	0.0714122	0.138451	FALSE	up in HPV(-)
TFEB	2	-0.0260832	4.3179	0.013621	0.907091	0.938634	FALSE	up in HPV(-)
PALB2	2	0.459104	4.85147	5.56299	0.0183441	0.0468192	FALSE	up in HPV(+)
CEP290	2	0.0437085	4.12179	0.0351822	0.851214	0.899272	FALSE	up in HPV(+)
NCOA4	2	0.205675	7.55764	1.32656	0.249418	0.3692	FALSE	up in HPV(+)
BCAR3	2	0.0361658	4.44242	0.0113065	0.915319	0.9441	FALSE	up in HPV(+)
PPM1D	2	0.864964	4.22605	18.8508	1.41e-05	0.00011477	FALSE	up in HPV(+)
RUNX2	2	-0.816291	3.84878	7.46017	0.0063079	0.0193332	FALSE	up in HPV(-)
WISP2	2	-0.607477	0.274821	1.22819	0.267759	0.388809	FALSE	up in HPV(-)
CCNE1	2	0.293573	3.76253	0.881666	0.347746	0.472414	FALSE	up in HPV(+)
DIRAS3	2	-0.849954	0.0553294	7.65115	0.00567363	0.0176946	FALSE	up in HPV(-)
SART1	2	-0.697351	6.56913	23.5263	1.23e-06	1.47e-05	FALSE	up in HPV(-)
NEMF	2	0.127629	5.58337	1.00641	0.315765	0.439382	FALSE	up in HPV(+)
AIMP1	2	-0.130627	5.98722	0.857285	0.354499	0.479555	FALSE	up in HPV(-)
MAGED1	2	-0.403213	6.44895	2.82709	0.0926863	0.170663	FALSE	up in HPV(-)
MTSS1	2	-0.430475	6.80036	3.01989	0.0822491	0.155009	FALSE	up in HPV(-)
BCL2L11	1	0.885936	5.46216	22.1644	2.5e-06	2.65e-05	FALSE	up in HPV(+)
ABCC5	1	0.367588	7.22456	1.41095	0.234899	0.352661	FALSE	up in HPV(+)
LRPPRC	1	-0.352371	7.23775	5.3912	0.0202385	0.0505375	FALSE	up in HPV(-)
CDH17	1	0.631626	-0.716643	1.68618	0.194105	0.305036	FALSE	up in HPV(+)
PDZK1IP1	1	-0.629704	5.80104	1.1291	0.287968	0.4106	FALSE	up in HPV(-)
RBM6	1	0.310949	6.47177	2.59686	0.107075	0.191377	FALSE	up in HPV(+)
RBM5	1	0.317755	6.52889	4.09272	0.0430684	0.0927207	FALSE	up in HPV(+)
CDK4	1	-0.231808	7.19598	1.75642	0.185072	0.294128	FALSE	up in HPV(-)
TOPORS	1	0.283562	5.01777	2.32831	0.127039	0.219843	FALSE	up in HPV(+)
ABCC4	1	0.412541	4.18923	1.49562	0.221346	0.336991	FALSE	up in HPV(+)
CDKN2B	1	0.771509	6.43805	2.48087	0.115238	0.203078	FALSE	up in HPV(+)
TFG	1	-0.521523	7.37882	7.66013	0.00564544	0.0176168	FALSE	up in HPV(-)
GNB2L1	1	0.102247	9.74018	0.202921	0.652374	0.747347	FALSE	up in HPV(+)
ECI2	1	-0.685221	4.61641	6.16034	0.0130646	0.0353878	FALSE	up in HPV(-)
OLFM4	1	0.658458	-0.88546	0.664295	0.415048	0.540903	FALSE	up in HPV(+)
NPRL2	1	0.676999	3.8141	11.7255	0.000616499	0.00276078	FALSE	up in HPV(+)
RBBP9	1	0.939993	5.02136	30.0299	4.25e-08	8.82e-07	FALSE	up in HPV(+)
PLAC1	1	-0.699883	0.852339	1.52567	0.216763	0.331807	FALSE	up in HPV(-)
SRSF10	1	0.414566	6.32488	0.729353	0.393093	0.518873	FALSE	up in HPV(+)
MAGED2	1	-0.168012	6.19669	0.781124	0.376798	0.502685	FALSE	up in HPV(-)
RALBP1	1	0.00184435	7.02674	0.000118017	0.991332	0.994376	FALSE	up in HPV(+)
PRSS21	1	1.39573	2.3276	3.80738	0.0510272	0.105988	FALSE	up in HPV(+)
OS9	1	-0.388574	8.15108	5.21233	0.0224273	0.055122	FALSE	up in HPV(-)
UPK1A	1	-0.986781	-2.18833	1.86488	0.172062	0.278298	FALSE	up in HPV(-)
OGFR	1	-0.299108	6.10466	2.04235	0.152973	0.253883	FALSE	up in HPV(-)
ESM1	1	-0.375362	2.6381	1.01588	0.313498	0.43686	FALSE	up in HPV(-)
FAM107A	1	0.810074	1.23201	3.18723	0.0742157	0.142785	FALSE	up in HPV(+)
STRAP	1	-0.84083	7.21812	24.4289	7.71e-07	9.9e-06	FALSE	up in HPV(-)
RNF139	1	-0.34309	5.63629	4.47816	0.0343306	0.0775417	FALSE	up in HPV(-)
CHN2	1	-0.0437419	0.414079	0.0179171	0.893517	0.928885	FALSE	up in HPV(-)
TUSC2	1	0.0740745	4.70817	0.177048	0.673923	0.764422	FALSE	up in HPV(+)
TMEM54	1	-0.133947	6.37913	0.301815	0.582747	0.68854	FALSE	up in HPV(-)
CHRNA3	1	0.905604	-1.02375	3.45189	0.0631794	0.125518	FALSE	up in HPV(+)
CHRNA5	1	-0.121076	2.41369	0.176599	0.674312	0.764758	FALSE	up in HPV(-)
AGPHD1	1	0.511886	0.313261	2.92028	0.0874728	0.162937	FALSE	up in HPV(+)
ADH1B	1	1.78431	-1.55336	4.00395	0.0453937	0.0967325	FALSE	up in HPV(+)
COMT	1	-0.539997	6.75043	10.8513	0.000987269	0.00408408	FALSE	up in HPV(-)
ADM	1	-0.921901	6.30119	7.47661	0.00625056	0.0191931	FALSE	up in HPV(-)
RAET1E	1	0.659393	2.42841	1.32241	0.25016	0.370018	FALSE	up in HPV(+)
CTSD	1	-0.144711	9.11509	0.420276	0.5168	0.633912	FALSE	up in HPV(-)
DAB2IP	1	-0.118913	6.57115	0.297933	0.585181	0.690766	FALSE	up in HPV(-)
CYLD	1	-0.0368539	5.88616	0.0275245	0.868232	0.911356	FALSE	up in HPV(-)
DAB2	1	-0.385523	4.59534	1.57243	0.209854	0.323871	FALSE	up in HPV(-)
DAPK1	1	-0.20788	3.82227	0.294692	0.587229	0.692634	FALSE	up in HPV(-)
DAXX	1	-0.0299677	6.10708	0.0504077	0.822355	0.87764	FALSE	up in HPV(-)
DHX9	1	0.185224	7.73506	1.75318	0.185477	0.294571	FALSE	up in HPV(+)
DMBT1	1	0.12907	-0.562681	0.0188578	0.890775	0.926742	FALSE	up in HPV(+)
E2F3	1	-0.0101716	5.0376	0.00366385	0.951734	0.968331	FALSE	up in HPV(-)
AHR	1	-0.846764	6.80179	13.1045	0.000294589	0.00151001	FALSE	up in HPV(-)
NLRP7	1	-0.866129	0.0735152	2.32711	0.127137	0.219966	FALSE	up in HPV(-)
FLCN	1	-0.347379	4.93245	4.25713	0.0390858	0.0857269	FALSE	up in HPV(-)
EMP1	1	-0.479284	8.47041	1.38655	0.238989	0.357422	FALSE	up in HPV(-)
EMP3	1	-0.887509	5.23086	10.1768	0.00142216	0.00553909	FALSE	up in HPV(-)
TUBB	1	-0.0834989	10.0509	0.182002	0.669658	0.761087	FALSE	up in HPV(-)
EPAS1	1	0.207427	7.31735	0.525332	0.468576	0.591641	FALSE	up in HPV(+)
ERBB4	1	-1.18196	-2.28974	1.97039	0.160406	0.26333	FALSE	up in HPV(-)
ERCC4	1	0.245059	3.5156	1.71315	0.190577	0.300885	FALSE	up in HPV(+)
ERG	1	-0.217832	3.34751	0.773824	0.379037	0.504805	FALSE	up in HPV(-)
AKT2	1	0.135638	6.64763	1.00666	0.315704	0.439372	FALSE	up in HPV(+)
ETS1	1	-0.252218	6.32532	0.640445	0.42355	0.549179	FALSE	up in HPV(-)
ETV1	1	0.62787	2.59007	2.07791	0.149445	0.249039	FALSE	up in HPV(+)
EVPL	1	-0.037496	7.54096	0.00971033	0.921503	0.948088	FALSE	up in HPV(-)
EWSR1	1	-0.124856	8.05912	0.856466	0.35473	0.479787	FALSE	up in HPV(-)
EXT1	1	-0.948631	6.89093	18.8975	1.38e-05	0.000112442	FALSE	up in HPV(-)
EXT2	1	-0.896523	6.2187	20.3561	6.43e-06	5.96e-05	FALSE	up in HPV(-)
FABP3	1	-0.787066	1.61953	3.35709	0.0669162	0.131403	FALSE	up in HPV(-)
FBLN1	1	0.718953	7.12693	12.7129	0.000363145	0.00178685	FALSE	up in HPV(+)
FASN	1	0.00414099	7.43819	0.000281276	0.986619	0.991414	FALSE	up in HPV(+)
FGFR2	1	0.173638	5.97482	0.34141	0.559017	0.668969	FALSE	up in HPV(+)
CASC3	1	-0.015708	6.41034	0.0117152	0.913808	0.943017	FALSE	up in HPV(-)
CARD8	1	0.92855	4.6145	20.0553	7.52e-06	6.81e-05	FALSE	up in HPV(+)
TPX2	1	0.0620594	6.77906	0.112083	0.737785	0.813738	FALSE	up in HPV(+)
PDZD2	1	0.546864	4.17822	2.87439	0.0899989	0.166734	FALSE	up in HPV(+)
KDM4C	1	0.662365	4.60477	14.5431	0.000136993	0.000783583	FALSE	up in HPV(+)
ERC1	1	-0.69193	5.71984	16.6843	4.41e-05	0.000301605	FALSE	up in HPV(-)
CLASP2	1	0.478269	5.26642	8.607	0.00334873	0.0114397	FALSE	up in HPV(+)
FLI1	1	0.820047	3.55986	6.67516	0.00977657	0.02798	FALSE	up in HPV(+)
EPB41L3	1	0.33336	3.17214	0.905483	0.341316	0.466004	FALSE	up in HPV(+)
KANK1	1	-0.557389	5.34069	5.58755	0.0180886	0.0462869	FALSE	up in HPV(-)
SIRT1	1	0.476064	4.53992	5.3861	0.0202977	0.0506622	FALSE	up in HPV(+)
PRAME	1	-1.67634	3.93461	4.34067	0.0372122	0.082595	FALSE	up in HPV(-)
PATZ1	1	0.535772	5.07789	7.0599	0.00788284	0.0233075	FALSE	up in HPV(+)
AMACR	1	-0.699487	1.5756	5.7198	0.0167747	0.0434418	FALSE	up in HPV(-)
CADM1	1	-0.144747	4.08457	0.139398	0.70888	0.790884	FALSE	up in HPV(-)
ALK	1	-1.11951	-1.71419	3.98592	0.0458821	0.0974936	FALSE	up in HPV(-)
FRK	1	0.376863	2.4513	1.93302	0.164429	0.268254	FALSE	up in HPV(+)
ALOX15B	1	0.504258	2.98708	0.698918	0.403148	0.528939	FALSE	up in HPV(+)
ABL1	1	-0.103919	6.00563	0.442867	0.505742	0.624758	FALSE	up in HPV(-)
NR5A1	1	0.664893	-2.8009	1.21151	0.271033	0.392517	FALSE	up in HPV(+)
FUS	1	0.140964	8.29445	0.853711	0.355505	0.480596	FALSE	up in HPV(+)
L3MBTL1	1	0.890331	1.8798	6.61552	0.0101094	0.0287362	FALSE	up in HPV(+)
NUPR1	1	0.898361	6.43655	8.19301	0.00420521	0.0138417	FALSE	up in HPV(+)
STEAP1	1	0.000155085	4.30329	2.65e-07	0.999589	0.999834	FALSE	up in HPV(+)
PELP1	1	-0.212904	6.35996	1.4315	0.23152	0.348389	FALSE	up in HPV(-)
BBC3	1	0.638275	3.63	6.28122	0.0122024	0.033553	FALSE	up in HPV(+)
SLC39A1	1	-0.0859943	6.94267	0.373545	0.541078	0.654841	FALSE	up in HPV(-)
TOX3	1	-1.32446	-2.36416	2.01972	0.155267	0.256726	FALSE	up in HPV(-)
EML4	1	0.520896	6.54239	12.5512	0.000395948	0.00191598	FALSE	up in HPV(+)
GNAI2	1	-0.0696216	7.48446	0.196846	0.657279	0.751259	FALSE	up in HPV(-)
GNAS	1	-0.581453	9.62553	11.9181	0.000555904	0.00253825	FALSE	up in HPV(-)
GNRH1	1	0.949493	1.92156	12.1998	0.000477949	0.00223719	FALSE	up in HPV(+)
SFN	1	-0.847268	11.1264	5.97507	0.0145095	0.0384286	FALSE	up in HPV(-)
GPC1	1	-0.862049	8.18308	10.06	0.00151519	0.00584883	FALSE	up in HPV(-)
ANGPT2	1	-0.170292	3.30219	0.238016	0.625643	0.725321	FALSE	up in HPV(-)
GPER	1	0.319193	1.39521	0.917629	0.338098	0.462616	FALSE	up in HPV(+)
MACROD1	1	-0.0319814	3.89762	0.0163627	0.898215	0.932522	FALSE	up in HPV(-)
PYCARD	1	-0.654226	5.63819	4.84514	0.0277241	0.0653255	FALSE	up in HPV(-)
CXCL1	1	-0.402453	4.85134	0.78102	0.376829	0.502685	FALSE	up in HPV(-)
ZNRD1	1	-0.269396	4.3826	1.94109	0.16355	0.267125	FALSE	up in HPV(-)
HLA-G	1	0.304509	-1.61338	0.207302	0.64889	0.744506	FALSE	up in HPV(+)
APAF1	1	0.755138	4.02382	16.0253	6.25e-05	0.000401824	FALSE	up in HPV(+)
HNRNPA2B1	1	0.121173	10.1772	0.646947	0.421206	0.546922	FALSE	up in HPV(+)
HOXA5	1	0.800218	1.4719	3.60578	0.057579	0.116759	FALSE	up in HPV(+)
HOXA7	1	-0.898125	-0.0990442	1.75656	0.185055	0.294128	FALSE	up in HPV(-)
HOXA9	1	1.15212	-1.47813	2.20872	0.137233	0.233379	FALSE	up in HPV(+)
SERPINA9	1	1.07775	-1.62327	2.2097	0.137145	0.233285	FALSE	up in HPV(+)
APEX1	1	-0.158344	7.25191	1.23689	0.266071	0.386909	FALSE	up in HPV(-)
HSD17B1	1	-0.489076	3.67107	4.37666	0.0364343	0.0812437	FALSE	up in HPV(-)
HSPB1	1	-0.133927	11.0109	0.155643	0.6932	0.779307	FALSE	up in HPV(-)
ID1	1	-0.5555	7.06318	2.30709	0.128785	0.222345	FALSE	up in HPV(-)
ID3	1	-0.666517	5.56271	7.14154	0.00753186	0.0224363	FALSE	up in HPV(-)
IGBP1	1	-0.254936	5.66572	2.55123	0.110208	0.195862	FALSE	up in HPV(-)
IL1B	1	0.0745612	3.65028	0.0347752	0.852067	0.899707	FALSE	up in HPV(+)
IL1RN	1	0.336092	7.15597	0.563955	0.452671	0.576281	FALSE	up in HPV(+)
AQP1	1	-0.247275	5.42023	0.860918	0.353482	0.478543	FALSE	up in HPV(-)
IL13RA2	1	-0.997767	-0.758718	2.35169	0.125147	0.217328	FALSE	up in HPV(-)
INCENP	1	0.05366	5.02704	0.0953987	0.757423	0.828967	FALSE	up in HPV(+)
ITGB1	1	-0.732599	9.07072	9.68884	0.0018539	0.00693982	FALSE	up in HPV(-)
ITGB4	1	-0.635481	9.13013	4.30928	0.037905	0.083723	FALSE	up in HPV(-)
ITGB6	1	-0.705254	4.80654	1.98193	0.159188	0.261856	FALSE	up in HPV(-)
DND1	1	0.205502	2.53834	0.599633	0.438718	0.56379	FALSE	up in HPV(+)
LAMA5	1	0.169518	8.1398	0.332651	0.564102	0.672788	FALSE	up in HPV(+)
RPSA	1	0.349812	9.89542	3.03816	0.0813279	0.153734	FALSE	up in HPV(+)
LGALS3BP	1	-0.875926	8.57602	15.8197	6.97e-05	0.000441162	FALSE	up in HPV(-)
TM4SF1	1	0.0522195	8.58165	0.0195173	0.888894	0.925721	FALSE	up in HPV(+)
MCL1	1	-0.280669	9.18677	1.87714	0.17066	0.276522	FALSE	up in HPV(-)
MLLT1	1	0.534921	6.35066	11.251	0.000795812	0.00342385	FALSE	up in HPV(+)
ASGR2	1	-0.00198297	-1.02282	2.64e-05	0.995898	0.997302	FALSE	up in HPV(-)
MPL	1	-0.416246	-0.86327	1.19156	0.275015	0.396527	FALSE	up in HPV(-)
MSMB	1	0.820593	0.315421	1.65367	0.19846	0.310421	FALSE	up in HPV(+)
MSR1	1	0.157588	2.90867	0.144081	0.704257	0.7878	FALSE	up in HPV(+)
MTR	1	0.343563	5.38983	4.22212	0.0399002	0.0872103	FALSE	up in HPV(+)
MUC6	1	0.382653	-1.19858	0.495825	0.48134	0.603004	FALSE	up in HPV(+)
MYCL1	1	0.758948	5.37662	3.83811	0.0501001	0.104488	FALSE	up in HPV(+)
ZFHX3	1	-0.601103	4.34896	8.17625	0.00424424	0.0139393	FALSE	up in HPV(-)
NAB2	1	-0.331936	5.77525	3.52061	0.0606103	0.121325	FALSE	up in HPV(-)
NBN	1	0.336539	6.0739	3.4493	0.0632786	0.125666	FALSE	up in HPV(+)
NF1	1	0.0188655	6.10091	0.0129294	0.90947	0.940085	FALSE	up in HPV(+)
NFE2L2	1	0.0223141	8.10693	0.00956167	0.922104	0.948463	FALSE	up in HPV(+)
NKX3-1	1	0.579418	2.92118	2.032	0.154018	0.255098	FALSE	up in HPV(+)
NME2	1	-0.765629	5.95487	23.436	1.29e-06	1.53e-05	FALSE	up in HPV(-)
NOV	1	0.372157	3.92573	0.544695	0.460493	0.584009	FALSE	up in HPV(+)
NOVA2	1	-0.57394	-0.366884	3.30006	0.0692775	0.135146	FALSE	up in HPV(-)
NPM1	1	-0.23274	9.72242	1.35808	0.243871	0.363028	FALSE	up in HPV(-)
YBX1	1	-0.413118	9.4762	3.66033	0.0557227	0.113729	FALSE	up in HPV(-)
NTRK1	1	-0.195618	-0.990369	0.230977	0.6308	0.729437	FALSE	up in HPV(-)
OPCML	1	-1.32871	-2.11146	3.99474	0.0456425	0.0971443	FALSE	up in HPV(-)
TNFRSF11B	1	0.163932	0.724492	0.133186	0.715152	0.796259	FALSE	up in HPV(+)
PAK1	1	-0.57658	6.20448	7.69233	0.00554561	0.0173583	FALSE	up in HPV(-)
ANO7	1	-0.598999	-0.759573	2.71272	0.0995511	0.180696	FALSE	up in HPV(-)
PAWR	1	-0.801738	4.66924	15.3436	8.96e-05	0.000548206	FALSE	up in HPV(-)
PAX2	1	-0.622636	-3.15545	0.591474	0.44185	0.566566	FALSE	up in HPV(-)
PPHLN1	1	0.0328349	5.79131	0.0597296	0.806924	0.866661	FALSE	up in HPV(+)
EMCN	1	-0.37638	1.95713	1.02135	0.3122	0.435605	FALSE	up in HPV(-)
SLC26A4	1	0.572168	-1.29031	1.3997	0.236773	0.354726	FALSE	up in HPV(+)
RSF1	1	-0.0170888	4.65431	0.00740216	0.931438	0.954776	FALSE	up in HPV(-)
PHB	1	-0.684784	7.08593	19.5012	1.01e-05	8.66e-05	FALSE	up in HPV(-)
PIM1	1	-0.200394	6.55482	0.555002	0.456281	0.579882	FALSE	up in HPV(-)
PKNOX1	1	0.387482	4.72185	7.29959	0.00689704	0.0208455	FALSE	up in HPV(+)
FXYD3	1	0.393528	8.95738	2.03664	0.153548	0.254486	FALSE	up in HPV(+)
PML	1	-0.168694	7.08428	0.529486	0.466823	0.590112	FALSE	up in HPV(-)
FXYD5	1	-0.913047	6.14774	10.3447	0.00129845	0.00514344	FALSE	up in HPV(-)
ACP5	1	-0.0460457	5.67556	0.0342224	0.853235	0.900765	FALSE	up in HPV(-)
UGT1A6	1	-1.27679	2.0735	4.43689	0.0351703	0.07904	FALSE	up in HPV(-)
BCAS3	1	0.340783	4.15028	3.16475	0.0752438	0.144389	FALSE	up in HPV(+)
RNF43	1	0.356269	4.72249	2.08556	0.148698	0.248099	FALSE	up in HPV(+)
ACPP	1	0.635113	3.05611	2.27262	0.131677	0.22631	FALSE	up in HPV(+)
CDCA8	1	0.421763	5.29924	3.78627	0.0516746	0.107045	FALSE	up in HPV(+)
CASC1	1	0.573395	-1.62245	1.33287	0.248295	0.368105	FALSE	up in HPV(+)
FERMT1	1	-0.735503	6.5598	8.22152	0.00413965	0.0136479	FALSE	up in HPV(-)
PRKAR1A	1	-0.104746	7.63494	0.428163	0.512892	0.630681	FALSE	up in HPV(-)
CHFR	1	0.506996	4.86669	5.12089	0.0236395	0.0574669	FALSE	up in HPV(+)
PRLR	1	1.07337	2.10408	2.46251	0.116592	0.205103	FALSE	up in HPV(+)
PSAP	1	-0.0481665	9.60769	0.0558141	0.813239	0.871172	FALSE	up in HPV(-)
CCNL1	1	0.058501	6.96642	0.0898637	0.764351	0.834264	FALSE	up in HPV(+)
PTCH1	1	0.472025	3.70014	2.24232	0.134279	0.229767	FALSE	up in HPV(+)
PTGFR	1	-0.23879	0.316669	0.293462	0.588011	0.693255	FALSE	up in HPV(-)
PTGFRN	1	-0.883925	7.68443	19.8533	8.36e-06	7.43e-05	FALSE	up in HPV(-)
BIRC6	1	0.0867691	6.44276	0.369472	0.543292	0.65684	FALSE	up in HPV(+)
BAI1	1	-0.469406	1.3744	1.04624	0.306374	0.429792	FALSE	up in HPV(-)
MTA3	1	-0.257205	4.57525	2.30006	0.129369	0.223094	FALSE	up in HPV(-)
ZNF608	1	-0.846742	2.43286	3.55246	0.0594572	0.119603	FALSE	up in HPV(-)
PTK6	1	-0.554115	4.65465	1.48366	0.223202	0.339089	FALSE	up in HPV(-)
STIM2	1	0.395507	5.32882	3.99777	0.0455606	0.0970249	FALSE	up in HPV(+)
PTPRJ	1	0.634944	4.40359	5.13375	0.0234649	0.0571547	FALSE	up in HPV(+)
PRUNE	1	0.288498	4.93595	3.50067	0.0613441	0.122448	FALSE	up in HPV(+)
RAC1	1	0.43649	9.17936	5.04252	0.0247325	0.0595477	FALSE	up in HPV(+)
RAD51	1	0.184156	4.37506	0.930942	0.334618	0.459178	FALSE	up in HPV(+)
RAD51B	1	-0.169169	2.5181	0.440848	0.506714	0.625438	FALSE	up in HPV(-)
MOK	1	-0.591925	2.63867	3.28066	0.0701006	0.136486	FALSE	up in HPV(-)
RARA	1	-0.885451	4.78724	21.1396	4.27e-06	4.18e-05	FALSE	up in HPV(-)
RBBP8	1	0.262401	6.53918	1.26801	0.260139	0.380758	FALSE	up in HPV(+)
BCL9	1	0.443896	4.44492	6.8178	0.00902537	0.0261787	FALSE	up in HPV(+)
BCR	1	-0.251138	6.74868	2.27981	0.131068	0.225501	FALSE	up in HPV(-)
CLIP1	1	-0.298483	6.96625	2.50774	0.113289	0.200377	FALSE	up in HPV(-)
THADA	1	-0.216836	5.26463	3.00986	0.0827592	0.155845	FALSE	up in HPV(-)
SEMA3F	1	0.603519	6.654	7.78456	0.00526947	0.0166348	FALSE	up in HPV(+)
LRRC4	1	0.277803	4.71917	0.204033	0.651485	0.746749	FALSE	up in HPV(+)
SLC1A5	1	-0.0438551	7.86331	0.0521805	0.819312	0.875304	FALSE	up in HPV(-)
BMP6	1	-0.165049	1.22465	0.159528	0.689591	0.776358	FALSE	up in HPV(-)
SLC15A1	1	-0.890765	0.816021	2.95579	0.0855704	0.160215	FALSE	up in HPV(-)
SLC19A1	1	-0.163442	3.44583	0.353819	0.551959	0.66378	FALSE	up in HPV(-)
SMARCB1	1	-0.227912	6.45433	2.64484	0.103886	0.186822	FALSE	up in HPV(-)
BMX	1	-0.470525	-1.50083	1.16865	0.279678	0.401549	FALSE	up in HPV(-)
SMO	1	-0.929639	4.72853	6.08888	0.0136035	0.0364965	FALSE	up in HPV(-)
SPRR3	1	1.31993	8.67924	3.07647	0.0794327	0.150991	FALSE	up in HPV(+)
SRD5A1	1	0.0934173	5.72595	0.197778	0.656521	0.750723	FALSE	up in HPV(+)
SSTR5	1	1.51799	-0.225024	3.33971	0.0676266	0.132543	FALSE	up in HPV(+)
SS18	1	0.315339	6.79756	3.75611	0.052615	0.108511	FALSE	up in HPV(+)
ST14	1	-0.226206	7.8212	1.47524	0.224521	0.340523	FALSE	up in HPV(-)
STIM1	1	-0.372399	5.96633	6.05641	0.0138559	0.0370117	FALSE	up in HPV(-)
STK11	1	0.305944	6.20927	3.27226	0.0704607	0.137029	FALSE	up in HPV(+)
KLF9	1	-0.182561	4.8535	0.508309	0.475872	0.597896	FALSE	up in HPV(-)
ZEB1	1	-0.453709	3.99765	1.9268	0.165109	0.26913	FALSE	up in HPV(-)
BTG1	1	0.925039	8.09552	19.9793	7.83e-06	7.03e-05	FALSE	up in HPV(+)
TFAP2C	1	-0.757808	5.91549	7.64049	0.00570724	0.0177723	FALSE	up in HPV(-)
TG	1	1.08967	0.38177	5.01121	0.0251837	0.0604379	FALSE	up in HPV(+)
TIMP1	1	-0.870166	6.87722	9.73865	0.00180434	0.00678409	FALSE	up in HPV(-)
TSPAN8	1	0.613224	-0.878636	1.2603	0.261594	0.382181	FALSE	up in HPV(+)
TOP2B	1	0.748278	7.02563	16.6074	4.6e-05	0.000311871	FALSE	up in HPV(+)
TPD52L2	1	-0.682028	7.24278	14.1179	0.000171706	0.000952457	FALSE	up in HPV(-)
TPO	1	-1.34731	-1.62077	4.31715	0.0377301	0.0834722	FALSE	up in HPV(-)
TPT1	1	-0.416824	10.9734	2.98931	0.0838156	0.157526	FALSE	up in HPV(-)
HSP90B1	1	-0.534044	9.79304	8.62295	0.00331954	0.0113686	FALSE	up in HPV(-)
TRPC1	1	-0.572207	1.22642	2.16955	0.140767	0.237805	FALSE	up in HPV(-)
TRPS1	1	-0.0637585	5.34871	0.07136	0.789367	0.853831	FALSE	up in HPV(-)
TSC1	1	0.298548	5.25089	3.77802	0.05193	0.107451	FALSE	up in HPV(+)
TUFM	1	-0.320194	7.65208	3.01269	0.0826152	0.155645	FALSE	up in HPV(-)
SUMO1	1	-0.0176353	7.01919	0.0113219	0.915262	0.9441	FALSE	up in HPV(-)
UCHL1	1	0.165812	4.77748	0.0614731	0.804183	0.864626	FALSE	up in HPV(+)
UPK2	1	-1.1661	-1.29558	5.0502	0.0246231	0.0593367	FALSE	up in HPV(-)
XRCC2	1	0.548433	2.75447	4.02803	0.0447501	0.095573	FALSE	up in HPV(+)
PTTG1IP	1	0.23273	7.59319	1.76935	0.183463	0.292167	FALSE	up in HPV(+)
ZNF217	1	0.193321	6.13496	1.23256	0.266909	0.387817	FALSE	up in HPV(+)
PRDM2	1	0.686177	5.94074	24.8678	6.14e-07	8.22e-06	FALSE	up in HPV(+)
BTG2	1	0.553973	6.70029	4.80962	0.0283013	0.0664841	FALSE	up in HPV(+)
PAX8	1	0.283348	2.13372	0.452521	0.50114	0.620841	FALSE	up in HPV(+)
SEMA3B	1	-0.949426	3.48063	4.4636	0.0346245	0.0780604	FALSE	up in HPV(-)
AHNAK	1	-0.632334	10.0812	7.26314	0.00703842	0.0211983	FALSE	up in HPV(-)
REEP5	1	-0.281817	6.93589	3.05908	0.0802871	0.152234	FALSE	up in HPV(-)
VTCN1	1	-0.593412	1.90344	0.713397	0.398318	0.524118	FALSE	up in HPV(-)
ST7	1	-0.20816	4.29557	1.78352	0.181717	0.290082	FALSE	up in HPV(-)
BAALC	1	-1.204	1.17397	5.32457	0.0210268	0.052217	FALSE	up in HPV(-)
CCDC6	1	-0.171853	6.38638	0.974129	0.323653	0.447877	FALSE	up in HPV(-)
PTP4A2	1	0.391298	7.33098	7.18847	0.00733735	0.0219529	FALSE	up in HPV(+)
SSPN	1	-0.239005	3.77673	0.371171	0.542366	0.656061	FALSE	up in HPV(-)
MLL2	1	0.258646	6.49359	2.49991	0.113853	0.20116	FALSE	up in HPV(+)
ELL	1	-0.145066	4.98536	0.873965	0.34986	0.474694	FALSE	up in HPV(-)
MIA	1	0.905614	-1.63493	1.52181	0.217346	0.332388	FALSE	up in HPV(+)
NCOA3	1	-0.211916	6.22669	1.51528	0.218335	0.333619	FALSE	up in HPV(-)
CAPG	1	-0.120166	7.53512	0.416119	0.51888	0.6357	FALSE	up in HPV(-)
AXIN2	1	-0.524058	2.46262	1.57321	0.209742	0.32379	FALSE	up in HPV(-)
UXT	1	0.079207	5.40408	0.218629	0.640087	0.737739	FALSE	up in HPV(+)
PPP1R1B	1	-0.0264448	-0.501614	0.00147848	0.969328	0.980073	FALSE	up in HPV(-)
ANTXR1	1	-0.643661	6.44006	4.76068	0.0291171	0.067951	FALSE	up in HPV(-)
SPINK7	1	-0.396356	1.54462	0.267712	0.604871	0.706403	FALSE	up in HPV(-)
NUDCD1	1	-0.444722	5.00406	5.91861	0.0149818	0.0394683	FALSE	up in HPV(-)
EAF1	1	0.0231092	5.00271	0.0181417	0.892856	0.928458	FALSE	up in HPV(+)
TNFSF11	1	-0.126391	1.0153	0.081142	0.775756	0.843163	FALSE	up in HPV(-)
RUNX1	1	0.0517311	6.79392	0.0821089	0.77446	0.842091	FALSE	up in HPV(+)
RNASET2	1	0.498207	5.08529	4.43473	0.0352148	0.0791291	FALSE	up in HPV(+)
CBFB	1	-0.208372	6.33003	1.35058	0.245177	0.364475	FALSE	up in HPV(-)
HYAL2	1	-0.191965	5.33671	1.49564	0.221344	0.336991	FALSE	up in HPV(-)
CFLAR	1	0.0188882	7.31968	0.0175484	0.894612	0.929714	FALSE	up in HPV(+)
WISP3	1	-0.957081	0.268525	1.69786	0.192568	0.303268	FALSE	up in HPV(-)
PROM1	1	-0.469201	0.337627	0.232913	0.629372	0.728164	FALSE	up in HPV(-)
KRIT1	1	-0.0568739	5.45141	0.175618	0.675166	0.76546	FALSE	up in HPV(-)
BCL10	1	0.0295022	5.09057	0.0174403	0.894936	0.929886	FALSE	up in HPV(+)
AIP	1	0.0832179	5.55695	0.291773	0.589087	0.693823	FALSE	up in HPV(+)
PDCD5	1	-0.405654	6.28691	5.08597	0.0241202	0.0583572	FALSE	up in HPV(-)
EXO1	1	0.434743	4.33246	4.07869	0.0434273	0.0932722	FALSE	up in HPV(+)
EBAG9	1	-0.299671	4.99369	3.39054	0.0655716	0.129354	FALSE	up in HPV(-)
LPAR2	1	0.164286	4.45819	0.714656	0.397903	0.523735	FALSE	up in HPV(+)
REPS2	1	0.733992	2.71666	4.70604	0.0300568	0.0697491	FALSE	up in HPV(+)
AURKB	1	0.0313953	5.56143	0.0221449	0.881702	0.92041	FALSE	up in HPV(+)
DSEL	1	-0.87488	1.94896	4.78783	0.0286615	0.067118	FALSE	up in HPV(-)
SCGB3A1	1	0.700357	-2.40419	0.955078	0.32843	0.452588	FALSE	up in HPV(+)
ORAI3	1	0.223449	4.418	1.0023	0.316755	0.440421	FALSE	up in HPV(+)
KLF4	1	0.261124	7.38671	0.597346	0.439592	0.564425	FALSE	up in HPV(+)
TCEAL1	1	-0.416093	3.1976	3.28328	0.0699888	0.136306	FALSE	up in HPV(-)
TTYH2	1	-0.964986	2.74895	6.7247	0.00950869	0.0273699	FALSE	up in HPV(-)
BCAR1	1	-0.866305	6.08654	10.7692	0.00103205	0.00423393	FALSE	up in HPV(-)
WTAP	1	-0.040299	6.98235	0.0597744	0.806853	0.866661	FALSE	up in HPV(-)
RNF14	1	0.303222	5.13972	3.58973	0.0581377	0.117498	FALSE	up in HPV(+)
GCC2	1	0.143147	4.64419	0.678856	0.409981	0.535839	FALSE	up in HPV(+)
CD63	1	-0.21083	8.34053	1.51609	0.218212	0.333494	FALSE	up in HPV(-)
GREB1	1	-0.526718	0.148399	2.69421	0.100714	0.182283	FALSE	up in HPV(-)
SART3	1	0.450118	5.97038	11.1072	0.000859926	0.00364026	FALSE	up in HPV(+)
DLGAP5	1	0.0529127	5.17754	0.0704708	0.790653	0.854404	FALSE	up in HPV(+)
