# Supplementary material for: Subtypes of HPV-Positive Head and Neck Cancers Are Associated with HPV Characteristics, Copy Number Alterations, PIK3CA Mutation, and Pathway Signatures
Source: Oxford University Press journal article supplement (doi:10.1158/1078-0432.ccr-16-0323), 2016-04-18
Supplement: 10780432ccr160323-sup-159763_1_supp_3417008_64616f.xlsx [file 10780432ccr160323-sup-159763_1_supp_3417008_64616f.xlsx]

## Sheet: Sheet1
Id	name	ConceptType	#Genes	Coeff	OddsRatio	P-Value	FDR	Direction	SigGenes
GO:0006936	muscle contraction	GOBP	251	-0.069989	0.647294	1.15253e-27	5.83641e-24	up in HPV(-)	100, 10052, 10324, 10345, 103910, 10398, 1131, 1144, 1146, 1160, 1264, 136, 1410, 1482, 1490, 152, 1613, 1674, 183, 1837, 1906, 1909, 2010, 2149, 219931, 2314, 23213, 23630, 23676, 2626, 26287, 26509, 2668, 2697, 29765, 3270, 3281, 3352, 3363, 3693, 3768, 4151, 4604, 4608, 4619, 4620, 4621, 4624, 4625, 4626, 4632, 4633, 4634, 4635, 4638, 4703, 4726, 477, 4842, 5350, 5578, 55800, 5592, 55959, 5606…
GO:0009888	tissue development	GOBP	1441	-0.0360272	0.799399	4.93765e-25	1.25021e-21	up in HPV(-)	100, 1001, 100506013, 10052, 1021, 10234, 10290, 10319, 10324, 10371, 10395, 1041, 10411, 10413, 10468, 1051, 10512, 10555, 10631, 10655, 1066, 1072, 10787, 10913, 11023, 11171, 11173, 11331, 1144, 116039, 122786, 123016, 1277, 1280, 1282, 1284, 1289, 1290, 1291, 129446, 1295, 129880, 1300, 1301, 1308, 1311, 133, 1374, 1382, 144165, 145258, 1460, 1471, 1474, 147495, 147906, 1482, 1490, 150572, 15…
GO:0003012	muscle system process	GOBP	291	-0.0635411	0.673759	1.0752e-24	1.8057e-21	up in HPV(-)	100, 10052, 10324, 10345, 103910, 10398, 10539, 1131, 1144, 1146, 1160, 1264, 132, 136, 1410, 1482, 1490, 152, 1613, 1674, 183, 1837, 1906, 1909, 2010, 2149, 219931, 2314, 23213, 23630, 23676, 2626, 26287, 26509, 2668, 2697, 29765, 3270, 3281, 3352, 3363, 3693, 3768, 4151, 4604, 4608, 4619, 4620, 4621, 4624, 4625, 4626, 4632, 4633, 4634, 4635, 4638, 4656, 4703, 4726, 477, 4842, 5350, 5578, 55800,…
GO:0030198	extracellular matrix organization	GOBP	332	-0.0606363	0.686032	1.52007e-24	1.8057e-21	up in HPV(-)	10211, 10319, 10631, 11096, 11117, 1277, 1278, 1280, 1281, 1282, 1284, 1287, 1288, 1289, 1290, 1291, 1292, 1295, 1300, 1301, 1305, 1306, 1308, 1311, 140766, 1462, 1471, 1490, 1513, 1514, 1515, 169611, 176, 183, 196264, 2191, 2200, 2201, 22795, 2280, 22801, 2295, 2303, 23213, 2335, 255631, 2621, 30008, 302, 3036, 3038, 323, 334, 3381, 340267, 3491, 351, 3655, 3678, 3690, 3693, 3909, 3910, 3912, 39…
GO:0043062	extracellular structure organization	GOBP	333	-0.0604997	0.686615	1.78288e-24	1.8057e-21	up in HPV(-)	10211, 10319, 10631, 11096, 11117, 1277, 1278, 1280, 1281, 1282, 1284, 1287, 1288, 1289, 1290, 1291, 1292, 1295, 1300, 1301, 1305, 1306, 1308, 1311, 140766, 1462, 1471, 1490, 1513, 1514, 1515, 169611, 176, 183, 196264, 2191, 2200, 2201, 22795, 2280, 22801, 2295, 2303, 23213, 2335, 255631, 2621, 30008, 302, 3036, 3038, 323, 334, 3381, 340267, 3491, 351, 3655, 3678, 3690, 3693, 3909, 3910, 3912, 39…
GO:0009653	anatomical structure morphogenesis	GOBP	2021	-0.0289838	0.835167	4.23738e-21	3.57635e-18	up in HPV(-)	100, 1000, 10016, 100506013, 10052, 10059, 1009, 10096, 10109, 1012, 10211, 10319, 10324, 10371, 10381, 103910, 10395, 10398, 1041, 10411, 10413, 10417, 10435, 10458, 10468, 10487, 10493, 10494, 10505, 10512, 10553, 10570, 10602, 10627, 10630, 10644, 10655, 107, 1072, 1073, 10787, 10804, 10810, 10894, 10913, 10938, 10959, 10979, 11023, 11155, 11171, 11202, 113026, 11331, 114299, 114793, 116039, 1…
GO:0061061	muscle structure development	GOBP	466	-0.0488188	0.738311	8.71746e-20	6.30646e-17	up in HPV(-)	1000, 1013, 10290, 10324, 10345, 1073, 10938, 11023, 11155, 1144, 129446, 1301, 133, 1410, 144165, 145258, 146862, 1482, 150572, 161882, 1649, 165, 165904, 182, 1827, 183, 1839, 1906, 1948, 2010, 2069, 207, 221662, 2273, 2274, 2275, 2280, 22801, 22943, 2303, 23135, 23363, 23764, 245806, 246329, 25988, 2626, 26287, 26508, 26548, 26576, 2697, 27063, 27230, 27231, 274, 2817, 283149, 29895, 3084, 308…
GO:0007517	muscle organ development	GOBP	309	-0.0542524	0.713797	4.83107e-18	2.71828e-15	up in HPV(-)	10290, 10324, 11023, 1144, 129446, 1301, 1410, 144165, 145258, 146862, 1482, 150572, 161882, 1649, 165, 1827, 1839, 1948, 2010, 2273, 2275, 2280, 22801, 22943, 2303, 23764, 245806, 246329, 2626, 26287, 26508, 26548, 26576, 2697, 27063, 27230, 27231, 2817, 283149, 29895, 3084, 3110, 3164, 3235, 3236, 3399, 347273, 3486, 3488, 3569, 3976, 4000, 4205, 4233, 4618, 4621, 4624, 4625, 463, 4633, 4634, 4…
GO:0045321	leukocyte activation	GOBP	576	0.0379369	1.26587	4.65385e-18	2.71828e-15	up in HPV(+)	10062, 10077, 101, 10125, 10148, 1029, 10333, 10385, 10461, 10537, 10538, 10673, 10859, 11151, 11314, 1139, 115650, 117157, 1191, 120425, 1236, 126259, 1268, 1269, 1326, 1380, 1435, 146206, 1493, 150372, 151888, 1524, 159296, 170575, 1725, 1794, 1880, 197358, 199, 200081, 201633, 202309, 2185, 2206, 2207, 2268, 22806, 22904, 2302, 23228, 2323, 23303, 23495, 23598, 2475, 2529, 257101, 26191, 27033…
GO:0046649	lymphocyte activation	GOBP	494	0.0396699	1.27958	5.37949e-18	2.72418e-15	up in HPV(+)	101, 10148, 1029, 10385, 10461, 10538, 10673, 10859, 11151, 11314, 1139, 115650, 117157, 120425, 1236, 126259, 1326, 1380, 146206, 1493, 150372, 151888, 159296, 170575, 1725, 1794, 1880, 197358, 199, 200081, 201633, 202309, 2185, 22806, 2302, 23228, 2323, 23303, 23495, 23598, 2475, 2529, 257101, 26191, 27033, 27040, 29126, 2956, 29760, 29851, 30009, 3070, 3071, 3087, 3108, 3109, 3111, 3113, 3115,…
GO:0044259	multicellular organismal macromolecule metabolic process	GOBP	105	-0.0770131	0.619647	8.49649e-18	3.91147e-15	up in HPV(-)	1277, 1278, 1280, 1281, 1282, 1284, 1287, 1288, 1289, 1290, 1291, 1292, 1295, 1300, 1301, 1305, 1306, 1308, 140766, 1471, 1490, 1513, 1514, 2028, 2149, 2191, 25824, 3091, 3569, 3570, 383, 4312, 4313, 4314, 4316, 4319, 4320, 4322, 4323, 4325, 5045, 50509, 5159, 5467, 5653, 64175, 652, 7040, 80781, 871, 9313, 9509, 9697
GO:0032963	collagen metabolic process	GOBP	99	-0.0775083	0.617743	2.85099e-17	1.20312e-14	up in HPV(-)	1277, 1278, 1280, 1281, 1282, 1284, 1287, 1288, 1289, 1290, 1291, 1292, 1295, 1300, 1301, 1305, 1306, 1308, 140766, 1471, 1490, 1513, 1514, 2149, 2191, 25824, 3091, 3569, 3570, 383, 4312, 4313, 4314, 4316, 4319, 4320, 4322, 4323, 4325, 5045, 50509, 5159, 5467, 5653, 64175, 652, 7040, 80781, 871, 9313, 9509, 9697
GO:0022617	extracellular matrix disassembly	GOBP	114	-0.0740186	0.631286	3.61311e-17	1.30691e-14	up in HPV(-)	10211, 11096, 1277, 1278, 1280, 1281, 1282, 1284, 1287, 1288, 1289, 1290, 1291, 1292, 1295, 1300, 1301, 1305, 1306, 1308, 1471, 1513, 1514, 1515, 176, 2191, 2200, 2201, 2335, 3909, 3912, 3915, 3918, 4312, 4313, 4314, 4316, 4319, 4320, 4322, 4323, 4325, 4811, 5045, 50509, 5650, 649, 7040, 7076, 7077, 7092, 7093, 80781, 9313, 9507, 960, 9622
GO:0042110	T cell activation	GOBP	357	0.0425891	1.30301	3.59314e-17	1.30691e-14	up in HPV(+)	101, 10148, 1029, 10385, 10538, 10673, 10859, 11151, 11314, 1139, 115650, 120425, 1236, 126259, 1326, 146206, 1493, 151888, 159296, 170575, 1725, 1794, 197358, 199, 201633, 2302, 23303, 23598, 2475, 2529, 26191, 27033, 27040, 29126, 29851, 30009, 3071, 3108, 3109, 3111, 3113, 3115, 3117, 3118, 3119, 3120, 3122, 3123, 3127, 324, 3280, 3454, 3458, 355, 3559, 3572, 3574, 3593, 3594, 3600, 3620, 3659…
GO:0006955	immune response	GOBP	1146	0.029282	1.19959	7.79758e-17	2.46793e-14	up in HPV(+)	100049587, 10062, 10087, 101, 10125, 10148, 10163, 10219, 10225, 10261, 1027, 10318, 10326, 10333, 10437, 10462, 10537, 10538, 10628, 10673, 10859, 10870, 10906, 11074, 111, 11126, 11151, 112, 11277, 11314, 115650, 116, 117157, 118788, 1191, 120425, 1230, 1233, 1234, 1235, 1236, 1237, 1240, 1268, 1269, 127544, 131450, 1378, 1380, 140564, 1435, 1436, 146206, 146433, 1493, 150372, 1512, 151888, 152…
GO:0060429	epithelium development	GOBP	903	-0.0350361	0.804338	7.53271e-17	2.46793e-14	up in HPV(-)	1001, 1021, 10371, 10395, 1041, 10411, 10413, 10468, 1051, 10512, 10555, 10655, 1066, 1072, 10787, 10913, 11331, 122786, 123016, 1280, 1282, 1289, 129880, 1308, 133, 1374, 1382, 144165, 145258, 1460, 1471, 1474, 147495, 1482, 1490, 1515, 1523, 153572, 1594, 16, 163778, 1645, 1646, 170302, 170690, 1747, 1749, 1761, 182, 183, 1839, 1861, 1874, 1896, 1906, 1909, 1950, 2019, 2069, 207, 2118, 2119, 21…
GO:0030574	collagen catabolic process	GOBP	70	-0.084049	0.593136	3.14155e-16	9.35812e-14	up in HPV(-)	1277, 1278, 1280, 1281, 1282, 1284, 1287, 1288, 1289, 1290, 1291, 1292, 1295, 1300, 1301, 1305, 1306, 1308, 140766, 1471, 1513, 1514, 2191, 4312, 4313, 4314, 4316, 4319, 4320, 4322, 4323, 4325, 5045, 50509, 5653, 80781, 9313, 9509
GO:0051276	chromosome organization	GOBP	713	0.0328965	1.22684	1.39388e-15	3.92146e-13	up in HPV(+)	10013, 10036, 10051, 10075, 1017, 10270, 1029, 10388, 10403, 10499, 10592, 10595, 1060, 10600, 1063, 10714, 10734, 10847, 10865, 10919, 10943, 1105, 11113, 11130, 11144, 11169, 11240, 112869, 114799, 114803, 117143, 142, 146909, 148479, 151246, 1643, 1677, 1763, 1786, 1788, 196528, 2005, 2099, 2139, 2140, 2145, 2146, 2177, 2237, 22823, 23030, 23047, 23081, 23126, 23133, 23137, 23244, 23338, 23347…
GO:0030049	muscle filament sliding	GOBP	37	-0.0994959	0.538845	1.86846e-15	4.71237e-13	up in HPV(-)	1674, 4604, 4620, 4621, 4624, 4625, 4626, 4632, 4633, 4634, 4635, 4703, 58, 70, 7125, 7134, 7135, 7136, 7137, 7138, 7139, 7140, 7168, 7169, 7170, 7273, 8557, 88
GO:0033275	actin-myosin filament sliding	GOBP	37	-0.0994959	0.538845	1.86846e-15	4.71237e-13	up in HPV(-)	1674, 4604, 4620, 4621, 4624, 4625, 4626, 4632, 4633, 4634, 4635, 4703, 58, 70, 7125, 7134, 7135, 7136, 7137, 7138, 7139, 7140, 7168, 7169, 7170, 7273, 8557, 88
GO:0042113	B cell activation	GOBP	175	0.0488518	1.35472	1.95418e-15	4.71237e-13	up in HPV(+)	1029, 10538, 10673, 11314, 1139, 115650, 1380, 1493, 150372, 151888, 159296, 170575, 1880, 200081, 202309, 2185, 22806, 2302, 23228, 23495, 2956, 29760, 30009, 3071, 3087, 3120, 3398, 3458, 355, 3574, 3635, 3676, 3718, 3815, 3964, 4064, 4066, 4067, 4292, 4332, 4436, 4602, 50943, 51237, 53335, 54440, 54900, 55024, 5579, 57379, 5777, 596, 602, 64092, 643, 64421, 6776, 6850, 695, 7157, 7253, 7292, 7…
GO:0044243	multicellular organismal catabolic process	GOBP	74	-0.0805792	0.606065	3.52785e-15	8.12048e-13	up in HPV(-)	1277, 1278, 1280, 1281, 1282, 1284, 1287, 1288, 1289, 1290, 1291, 1292, 1295, 1300, 1301, 1305, 1306, 1308, 140766, 1471, 1513, 1514, 2028, 2191, 4312, 4313, 4314, 4316, 4319, 4320, 4322, 4323, 4325, 5045, 50509, 5653, 80781, 9313, 9509
GO:0051146	striated muscle cell differentiation	GOBP	203	-0.0581424	0.696747	4.01664e-15	8.84359e-13	up in HPV(-)	1000, 10290, 10324, 10345, 1073, 10938, 11155, 144165, 1482, 150572, 1649, 165904, 1827, 183, 1906, 1948, 207, 221662, 2274, 22943, 23135, 23363, 246329, 2626, 26287, 27063, 27231, 3084, 30846, 3265, 3399, 341676, 3481, 3486, 3488, 3845, 4000, 4205, 4233, 4621, 4624, 4627, 4628, 463, 4633, 4656, 4842, 50507, 5159, 56603, 57462, 58, 58529, 5914, 64754, 650, 652, 6608, 6722, 6899, 6926, 70, 7040, 7…
GO:0044236	multicellular organismal metabolic process	GOBP	115	-0.0694893	0.649307	9.48804e-15	2.00198e-12	up in HPV(-)	1277, 1278, 1280, 1281, 1282, 1284, 1287, 1288, 1289, 1290, 1291, 1292, 1295, 1300, 1301, 1305, 1306, 1308, 140766, 1471, 1490, 1513, 1514, 2028, 2149, 2191, 25824, 3091, 353500, 3569, 3570, 383, 4312, 4313, 4314, 4316, 4319, 4320, 4322, 4323, 4325, 5045, 50509, 5159, 5467, 5653, 64175, 652, 7040, 80781, 871, 9313, 9509, 9697
GO:0006928	cellular component movement	GOBP	1403	-0.027356	0.843659	9.98446e-15	2.02245e-12	up in HPV(-)	100, 1000, 10016, 100506013, 10082, 10095, 10096, 10109, 1012, 10128, 1021, 10344, 10371, 10381, 103910, 10395, 10398, 10417, 10487, 10505, 10512, 10570, 10630, 1072, 10749, 10787, 10894, 11009, 11023, 11133, 11171, 122786, 123016, 127602, 1277, 1278, 1280, 1281, 1282, 1284, 1287, 1289, 1290, 1291, 1292, 131578, 14, 1400, 140885, 1459, 1460, 1462, 1464, 147372, 147495, 147700, 148738, 1490, 1613,…
GO:0000904	cell morphogenesis involved in differentiation	GOBP	714	-0.0358414	0.800323	1.04219e-14	2.02986e-12	up in HPV(-)	1009, 10096, 10109, 10211, 10319, 10371, 10381, 103910, 10398, 10417, 10458, 10487, 10494, 10505, 10512, 10570, 107, 1072, 1073, 10979, 11023, 11171, 122786, 123016, 1277, 1280, 1281, 1282, 1284, 1287, 1289, 1290, 1291, 1292, 1400, 145258, 1459, 1460, 147906, 148738, 150465, 1523, 161882, 170302, 1749, 1809, 1942, 1944, 1946, 1947, 1948, 1949, 2043, 2048, 2049, 2118, 2131, 2258, 22885, 22943, 229…
GO:0070252	actin-mediated cell contraction	GOBP	54	-0.0872848	0.581328	1.25087e-14	2.34608e-12	up in HPV(-)	122786, 1674, 2626, 4604, 4620, 4621, 4624, 4625, 4626, 4632, 4633, 4634, 4635, 4703, 477, 5350, 55742, 58, 6331, 6717, 70, 7125, 7134, 7135, 7136, 7137, 7138, 7139, 7140, 7168, 7169, 7170, 7273, 817, 8557, 88
GO:0060537	muscle tissue development	GOBP	303	-0.049096	0.737041	2.94162e-14	5.09344e-12	up in HPV(-)	10052, 10290, 10324, 10512, 11023, 1144, 129446, 1301, 144165, 1482, 150572, 161882, 1649, 165904, 1827, 183, 1948, 2010, 2274, 2280, 22943, 2303, 23135, 23363, 23764, 245806, 246329, 2626, 26287, 26508, 26576, 2697, 27063, 27231, 2817, 283149, 29895, 3084, 3164, 3235, 3236, 3399, 3486, 3488, 4000, 4205, 4233, 4618, 4624, 4625, 4628, 463, 4633, 4634, 4638, 4656, 50507, 5081, 5159, 5350, 56603, 57…
GO:0072358	cardiovascular system development	GOBP	773	-0.0341521	0.808769	3.01744e-14	5.09344e-12	up in HPV(-)	1000, 10016, 100506013, 10052, 1012, 10290, 10395, 10411, 10413, 10512, 10553, 10587, 10630, 10787, 113026, 1277, 1278, 1280, 1281, 1282, 1284, 1289, 129446, 1295, 129880, 1301, 1306, 133, 14, 144165, 1462, 1464, 147372, 1482, 1490, 150572, 161882, 1649, 165904, 1717, 1747, 182, 183, 1848, 1906, 1909, 1942, 1948, 1950, 196, 2028, 2048, 2049, 2050, 2069, 207, 2152, 2200, 2274, 2280, 22943, 2300, 2…
GO:0072359	circulatory system development	GOBP	773	-0.0341521	0.808769	3.01744e-14	5.09344e-12	up in HPV(-)	1000, 10016, 100506013, 10052, 1012, 10290, 10395, 10411, 10413, 10512, 10553, 10587, 10630, 10787, 113026, 1277, 1278, 1280, 1281, 1282, 1284, 1289, 129446, 1295, 129880, 1301, 1306, 133, 14, 144165, 1462, 1464, 147372, 1482, 1490, 150572, 161882, 1649, 165904, 1717, 1747, 182, 183, 1848, 1906, 1909, 1942, 1948, 1950, 196, 2028, 2048, 2049, 2050, 2069, 207, 2152, 2200, 2274, 2280, 22943, 2300, 2…
GO:0014706	striated muscle tissue development	GOBP	291	-0.04972	0.734188	3.44134e-14	5.6216e-12	up in HPV(-)	10052, 10290, 10324, 10512, 11023, 1144, 129446, 1301, 144165, 1482, 150572, 161882, 1649, 165904, 1827, 183, 1948, 2010, 2274, 2280, 22943, 2303, 23135, 23363, 23764, 245806, 246329, 2626, 26287, 26508, 26576, 2697, 27063, 27231, 2817, 283149, 29895, 3084, 3164, 3235, 3236, 3399, 3486, 3488, 4000, 4205, 4233, 4618, 4624, 4625, 4628, 463, 4633, 4634, 4656, 50507, 5081, 5159, 5350, 56603, 57158, 5…
GO:0048729	tissue morphogenesis	GOBP	483	-0.0407696	0.776183	5.44249e-14	8.61273e-12	up in HPV(-)	10371, 10395, 10413, 10468, 10512, 1072, 10787, 11331, 1282, 1289, 129446, 129880, 1301, 133, 144165, 1460, 1482, 1515, 153572, 161882, 170690, 182, 183, 1839, 1861, 1906, 1909, 1950, 2118, 2119, 2132, 2280, 22943, 2295, 2303, 23135, 23213, 23242, 2535, 25928, 2626, 2637, 2650, 26508, 2668, 2697, 27063, 2719, 2736, 28514, 3084, 3091, 3170, 3207, 3209, 3217, 3237, 3265, 341640, 3488, 3491, 3569, 3…
GO:0050776	regulation of immune response	GOBP	657	0.0318173	1.21864	7.43132e-14	1.14037e-11	up in HPV(+)	10062, 101, 10125, 10163, 10219, 10225, 1027, 10318, 10333, 10673, 10859, 10870, 10906, 11126, 11314, 115650, 116, 117157, 118788, 1191, 120425, 1236, 1268, 131450, 1378, 1380, 146206, 1493, 150372, 1512, 151888, 1520, 152831, 1690, 192670, 2065, 2206, 2207, 2208, 2209, 2210, 2213, 2219, 2247, 2261, 2268, 2302, 23098, 23228, 23239, 23411, 246, 2475, 257144, 257397, 259197, 25939, 26191, 26523, 26…
GO:0030098	lymphocyte differentiation	GOBP	244	0.0421926	1.2998	1.93106e-13	2.87614e-11	up in HPV(+)	101, 1029, 10461, 10538, 1236, 1380, 146206, 1493, 150372, 159296, 170575, 1794, 1880, 2185, 22806, 2302, 23228, 2323, 23598, 2529, 257101, 26191, 29760, 30009, 3071, 3087, 3108, 3111, 3120, 324, 3398, 3458, 355, 3559, 3574, 3593, 3594, 3600, 3635, 3659, 3662, 3676, 3702, 3718, 3815, 387357, 3964, 399, 4066, 4179, 4436, 4602, 5075, 50943, 51561, 5316, 53335, 54440, 55340, 5734, 57379, 57580, 5777…
GO:0030048	actin filament-based movement	GOBP	69	-0.0783369	0.614569	2.43579e-13	3.52423e-11	up in HPV(-)	122786, 1674, 2626, 4430, 4604, 4620, 4621, 4624, 4625, 4626, 4627, 4628, 4632, 4633, 4634, 4635, 4703, 477, 5350, 55742, 58, 6331, 6717, 70, 7125, 7134, 7135, 7136, 7137, 7138, 7139, 7140, 7168, 7169, 7170, 7273, 817, 8557, 88
GO:0009887	organ morphogenesis	GOBP	732	-0.0333086	0.813019	5.02382e-13	7.06685e-11	up in HPV(-)	10395, 1041, 10413, 10468, 10512, 10787, 10804, 10913, 11331, 116039, 123016, 124590, 1277, 1278, 1280, 1289, 1290, 129446, 1295, 129880, 1300, 1301, 1305, 1311, 133, 145258, 1482, 1490, 1515, 153572, 161882, 1745, 1746, 1747, 1749, 182, 183, 1874, 1896, 1906, 1909, 1942, 1948, 2016, 2048, 2050, 2069, 2070, 2118, 2119, 2201, 2273, 2274, 2280, 22943, 2295, 2300, 2303, 23213, 24147, 249, 2535, 2580…
GO:0001501	skeletal system development	GOBP	392	-0.0425362	0.767708	6.19053e-13	8.2497e-11	up in HPV(-)	1009, 10234, 10468, 10631, 10655, 11173, 116039, 1277, 1278, 1280, 1281, 1290, 1300, 1301, 1305, 1311, 145258, 1490, 165, 1745, 1746, 1749, 176, 1906, 196527, 2019, 2131, 2200, 2201, 2303, 23213, 249, 27230, 2734, 2736, 2778, 3091, 3198, 3207, 3209, 3215, 3216, 3217, 3218, 3227, 3235, 3236, 3237, 3292, 3340, 3481, 3487, 3491, 353500, 3623, 3636, 4017, 4060, 4148, 415, 4188, 4256, 4313, 4322, 4323…
GO:0043588	skin development	GOBP	305	-0.0468194	0.747542	6.03222e-13	8.2497e-11	up in HPV(-)	1001, 10058, 1041, 10413, 10468, 10555, 10913, 10999, 1277, 1278, 1281, 1289, 1290, 1308, 1382, 1474, 147495, 1490, 1515, 151516, 1523, 1594, 16, 163778, 182, 1896, 2069, 207, 2171, 22943, 2312, 23581, 23764, 242, 25818, 25833, 25928, 26154, 26524, 2735, 2736, 2778, 2810, 28514, 3229, 3488, 353139, 353140, 353142, 353145, 3624, 3655, 3728, 3848, 3857, 3858, 3861, 3868, 3872, 388698, 3909, 3918, 4…
GO:0048468	cell development	GOBP	1546	-0.0241934	0.860405	1.14253e-12	1.48353e-10	up in HPV(-)	1000, 10052, 1009, 10096, 10100, 10109, 1021, 10211, 10290, 10319, 10324, 10371, 10381, 103910, 10398, 10411, 10413, 10417, 10458, 10487, 10494, 10505, 10512, 10570, 107, 1072, 1073, 10810, 10938, 10979, 11023, 11075, 11155, 11171, 11202, 122786, 123016, 1277, 1280, 1281, 1282, 1284, 1287, 1289, 1290, 1291, 1292, 1301, 133, 1400, 1410, 144165, 145258, 1459, 1460, 147040, 1471, 147906, 1482, 14873…
GO:0050851	antigen receptor-mediated signaling pathway	GOBP	136	0.0473778	1.34237	1.81697e-12	2.30029e-10	up in HPV(+)	11314, 1236, 146206, 1493, 150372, 23228, 257144, 26191, 27040, 3071, 3113, 3115, 3117, 3118, 3119, 3120, 3122, 3123, 3127, 3551, 3635, 3702, 387357, 3937, 4067, 4332, 4690, 4790, 4792, 50852, 50943, 5142, 5291, 53347, 54900, 54923, 5579, 5777, 5795, 596, 640, 6850, 695, 7294, 7454, 7462, 7535, 785, 83416, 84174, 84433, 915, 916, 920, 930, 940, 9402, 973, 974
GO:0030217	T cell differentiation	GOBP	172	0.0446391	1.31971	2.07711e-12	2.46793e-10	up in HPV(+)	101, 1029, 10538, 1236, 146206, 1493, 159296, 170575, 1794, 2302, 23598, 2529, 26191, 30009, 3071, 3108, 3111, 324, 3458, 355, 3559, 3574, 3593, 3594, 3600, 3659, 3662, 3702, 3718, 3815, 387357, 399, 4179, 4602, 5075, 50943, 51561, 5316, 53335, 54440, 55340, 5734, 57580, 596, 5971, 602, 6097, 6304, 6363, 64218, 6693, 6776, 6850, 6932, 7157, 7292, 7294, 7535, 814, 8320, 84433, 8456, 84807, 8546, 8…
GO:0030855	epithelial cell differentiation	GOBP	472	-0.0387599	0.785938	2.04216e-12	2.46793e-10	up in HPV(-)	1001, 1021, 1041, 10411, 10413, 1051, 1066, 122786, 1282, 1374, 1471, 1515, 1523, 1594, 163778, 1645, 1646, 170302, 1747, 1749, 1761, 182, 183, 1874, 2069, 207, 2150, 2303, 2312, 23135, 23581, 23657, 23764, 2535, 25833, 25937, 26154, 2626, 26524, 2668, 2697, 2735, 2736, 2810, 28514, 2947, 29842, 307, 3084, 3091, 3170, 3209, 3215, 338879, 3399, 353116, 353139, 353140, 353142, 353145, 3850, 3858, 3…
GO:0050863	regulation of T cell activation	GOBP	232	0.041272	1.29239	2.0956e-12	2.46793e-10	up in HPV(+)	101, 10148, 1029, 10385, 10673, 10859, 11151, 11314, 115650, 1236, 126259, 1326, 146206, 1493, 151888, 1725, 199, 201633, 2302, 2475, 26191, 27040, 29126, 29851, 3071, 3108, 3109, 3111, 3113, 3115, 3117, 3118, 3119, 3120, 3122, 3123, 3127, 3280, 3458, 3559, 3572, 3574, 3593, 3594, 3600, 3620, 3659, 3662, 3683, 3718, 3902, 3964, 4067, 4179, 4602, 4690, 50943, 5133, 51561, 54440, 54900, 55340, 5542…
GO:0048738	cardiac muscle tissue development	GOBP	141	-0.0603638	0.687195	2.46882e-12	2.84138e-10	up in HPV(-)	10052, 10290, 129446, 1301, 144165, 1482, 161882, 165904, 183, 1948, 2274, 2280, 22943, 2303, 23135, 23363, 2626, 2697, 27063, 3084, 4000, 4205, 4624, 4625, 4628, 4633, 4634, 50507, 5159, 5350, 57158, 5914, 5950, 60485, 650, 652, 6722, 6909, 6926, 70, 7048, 7134, 7135, 7137, 7139, 7168, 7273, 7472, 7474, 8048, 8557, 859, 90, 9096, 91624, 9241, 9472
GO:0090304	nucleic acid metabolic process	GOBP	4128	0.016413	1.10738	2.86201e-12	3.22071e-10	up in HPV(+)	10009, 100101467, 100128927, 100129654, 10013, 100131390, 100131827, 100289635, 100289678, 100316904, 10036, 10051, 10062, 10075, 101, 1017, 10181, 10194, 10224, 10236, 10250, 1027, 10270, 1028, 10283, 1029, 10309, 10318, 1032, 10336, 10352, 10389, 10472, 10475, 10481, 10499, 105, 10521, 10522, 10533, 10535, 10538, 10592, 10595, 10600, 10614, 10628, 1063, 10636, 10656, 10657, 10659, 10714, 10721,…
GO:0048731	system development	GOBP	3291	-0.0178205	0.895165	3.83034e-12	4.2167e-10	up in HPV(-)	100, 1000, 1001, 10016, 100506013, 10052, 10058, 1009, 10096, 10100, 1012, 10202, 1021, 10211, 10234, 10272, 10290, 10319, 10324, 10371, 10381, 103910, 10395, 10398, 1041, 10411, 10413, 10417, 10458, 10468, 10487, 10494, 10501, 10505, 1051, 10512, 1053, 10553, 10555, 10570, 10579, 10587, 10630, 10631, 10634, 10655, 107, 1072, 1073, 10787, 10804, 10810, 10913, 10938, 10959, 10971, 10972, 10999, 11…
GO:0051249	regulation of lymphocyte activation	GOBP	307	0.0377639	1.26451	3.95836e-12	4.24307e-10	up in HPV(+)	101, 10148, 1029, 10385, 10461, 10673, 10859, 11151, 11314, 115650, 117157, 1236, 126259, 1326, 146206, 1493, 150372, 151888, 1725, 1880, 199, 201633, 22806, 2302, 2323, 23495, 2475, 26191, 27040, 29126, 29851, 30009, 3071, 3108, 3109, 3111, 3113, 3115, 3117, 3118, 3119, 3120, 3122, 3123, 3127, 3280, 3398, 3458, 355, 3559, 3572, 3574, 3593, 3594, 3600, 3620, 3635, 3659, 3662, 3683, 3718, 3902, 39…
GO:0061564	axon development	GOBP	501	-0.037393	0.792643	4.02187e-12	4.24307e-10	up in HPV(-)	1009, 10100, 10211, 10371, 10381, 103910, 10398, 10417, 10458, 10487, 10494, 10505, 10512, 10570, 107, 1072, 11023, 11202, 123016, 1280, 1281, 1282, 1284, 1287, 1289, 1290, 1291, 1292, 1400, 1459, 1460, 148738, 150465, 170302, 1749, 1809, 1942, 1944, 1946, 1947, 1948, 1949, 2043, 2048, 2049, 2118, 2131, 2258, 22885, 23114, 23242, 2335, 23365, 23767, 23768, 2535, 25806, 2596, 25987, 2637, 2664, 26…
GO:0022616	DNA strand elongation	GOBP	37	0.061471	1.46524	4.21128e-12	4.35223e-10	up in HPV(+)	10714, 1763, 2237, 23649, 340533, 3978, 4171, 4172, 4173, 4174, 4175, 4176, 5111, 51659, 5422, 5424, 5983, 5984, 5985, 6118, 64858, 84296, 9837
GO:0006271	DNA strand elongation involved in DNA replication	GOBP	34	0.0622191	1.47207	5.56206e-12	5.54932e-10	up in HPV(+)	10714, 1763, 2237, 23649, 340533, 3978, 4171, 4172, 4173, 4174, 4175, 4176, 5111, 51659, 5422, 5424, 5983, 5984, 5985, 6118, 84296, 9837
GO:0019219	regulation of nucleobase-containing compound metabolic process	GOBP	3643	0.0166691	1.10915	5.69836e-12	5.54932e-10	up in HPV(+)	10009, 100101467, 100128927, 100129654, 10013, 100131390, 100131827, 100271715, 100289635, 100289678, 100316904, 10036, 10044, 10062, 101, 10125, 1017, 10181, 10194, 10224, 10235, 10266, 1027, 1028, 1029, 10318, 10336, 10347, 10389, 10472, 10475, 10481, 10499, 10521, 10522, 10538, 10564, 10595, 10600, 10614, 10628, 1063, 10636, 10641, 10656, 10657, 10745, 10768, 10781, 10782, 10847, 10859, 10865,…
GO:0048812	neuron projection morphogenesis	GOBP	559	-0.0355536	0.801755	5.68029e-12	5.54932e-10	up in HPV(-)	1009, 10096, 10211, 10371, 10381, 103910, 10398, 10417, 10458, 10487, 10494, 10505, 10512, 10570, 107, 1072, 1073, 11023, 11202, 123016, 1280, 1281, 1282, 1284, 1287, 1289, 1290, 1291, 1292, 1400, 1459, 1460, 148738, 150465, 1523, 170302, 1749, 1809, 1942, 1944, 1946, 1947, 1948, 1949, 2016, 2043, 2048, 2049, 2118, 2131, 2258, 22885, 23114, 23242, 2335, 23363, 23365, 23543, 23767, 23768, 2535, 25…
GO:0006941	striated muscle contraction	GOBP	105	-0.0657235	0.664683	5.95212e-12	5.68708e-10	up in HPV(-)	10324, 1482, 1490, 1837, 23630, 23676, 2626, 3270, 4151, 4608, 4621, 4624, 4625, 4626, 4632, 4633, 4634, 4635, 477, 4842, 5350, 55800, 5606, 6324, 6327, 6330, 6331, 6717, 70, 7125, 7134, 7135, 7136, 7137, 7138, 7140, 7168, 7273, 775, 779, 8048, 817, 845, 8557, 859, 9446
GO:0030239	myofibril assembly	GOBP	44	-0.0859116	0.58631	6.13812e-12	5.75619e-10	up in HPV(-)	10324, 1073, 11155, 1482, 165904, 1906, 23363, 27063, 4205, 4621, 4624, 4628, 4633, 5159, 58, 58529, 6722, 70, 71, 7139, 7168, 7273, 8048, 84665, 8557, 859
GO:0008544	epidermis development	GOBP	264	-0.0474887	0.74444	6.80877e-12	6.15708e-10	up in HPV(-)	1001, 1041, 10413, 10468, 10555, 10913, 1308, 1382, 1474, 147495, 1490, 1515, 1523, 1594, 16, 163778, 182, 1896, 2069, 207, 2171, 22943, 2312, 23581, 23764, 25818, 25833, 25928, 26154, 26524, 2735, 2736, 2778, 2810, 28514, 3229, 3488, 353139, 353140, 353142, 353145, 3624, 3857, 3858, 3861, 3868, 3872, 3909, 3918, 4097, 43847, 4488, 4831, 4909, 50604, 51083, 51384, 5154, 5351, 5453, 5454, 5467, 56…
GO:0031032	actomyosin structure organization	GOBP	59	-0.0786276	0.61346	6.73373e-12	6.15708e-10	up in HPV(-)	10324, 1073, 11155, 1264, 1482, 165904, 1906, 22998, 23363, 27063, 4205, 4621, 4624, 4627, 4628, 4633, 5159, 54566, 58, 58529, 6722, 70, 71, 7139, 7168, 7273, 8048, 84665, 8557, 859
GO:0042692	muscle cell differentiation	GOBP	278	-0.0464215	0.749393	8.24615e-12	7.32605e-10	up in HPV(-)	1000, 1013, 10290, 10324, 10345, 1073, 10938, 11155, 133, 144165, 1482, 150572, 1649, 165904, 182, 1827, 183, 1906, 1948, 2069, 207, 221662, 2274, 22943, 23135, 23363, 246329, 25988, 2626, 26287, 27063, 27231, 274, 3084, 30846, 3265, 3399, 341676, 3481, 3486, 3488, 3845, 3956, 4000, 4205, 4233, 4618, 4621, 4624, 4627, 4628, 463, 4633, 4656, 4776, 4842, 50507, 5159, 56603, 57462, 57616, 58, 58529,…
GO:0070192	chromosome organization involved in meiosis	GOBP	27	0.0645238	1.4933	8.68906e-12	7.58645e-10	up in HPV(+)	10051, 10388, 10592, 10734, 10919, 11144, 151246, 2177, 256126, 285498, 4292, 55706, 56154, 5889, 9985
GO:0007507	heart development	GOBP	399	-0.0400469	0.779677	1.31108e-11	1.12531e-09	up in HPV(-)	100506013, 10052, 10290, 10395, 10413, 10512, 10587, 10787, 1280, 1281, 1289, 129446, 129880, 1301, 133, 144165, 1462, 1482, 150572, 161882, 165904, 182, 183, 1848, 1906, 1909, 1942, 1948, 2050, 2200, 2274, 2280, 22943, 2300, 2303, 23135, 23363, 23509, 2535, 2626, 26508, 2697, 27063, 27130, 2719, 2736, 28514, 3084, 3091, 3209, 3399, 3491, 3728, 4000, 4151, 4205, 4331, 4488, 4624, 4625, 4628, 4633…
GO:0048667	cell morphogenesis involved in neuron differentiation	GOBP	548	-0.0348401	0.805318	2.44955e-11	2.06742e-09	up in HPV(-)	1009, 10096, 10211, 10371, 10381, 103910, 10398, 10417, 10458, 10487, 10494, 10505, 10512, 10570, 107, 1072, 1073, 11023, 123016, 1280, 1281, 1282, 1284, 1287, 1289, 1290, 1291, 1292, 1400, 1459, 1460, 148738, 150465, 1523, 170302, 1749, 1809, 1942, 1944, 1946, 1947, 1948, 1949, 2043, 2048, 2049, 2118, 2131, 2258, 22885, 23114, 23242, 2335, 23363, 23365, 23543, 23767, 23768, 2535, 25791, 25806, 2…
GO:0048856	anatomical structure development	GOBP	3848	-0.0162875	0.903734	2.59842e-11	2.15712e-09	up in HPV(-)	100, 1000, 1001, 10016, 100506013, 10052, 10058, 10059, 1009, 10096, 10100, 10109, 1012, 1013, 10202, 1021, 10211, 10234, 10272, 10290, 10319, 10324, 10345, 10371, 10381, 103910, 10395, 10398, 1041, 10411, 10413, 10417, 10435, 10458, 10468, 10487, 10493, 10494, 10501, 10505, 1051, 10512, 1053, 10553, 10555, 10570, 10579, 10587, 10602, 10627, 10630, 10631, 10634, 10644, 10655, 1066, 107, 1072, 107…
GO:0050778	positive regulation of immune response	GOBP	437	0.0327575	1.22578	2.87303e-11	2.34661e-09	up in HPV(+)	10062, 101, 10163, 10318, 10333, 10673, 11314, 115650, 117157, 118788, 1191, 1236, 1268, 1378, 1380, 146206, 1493, 150372, 1520, 1690, 2207, 2208, 2209, 2219, 2268, 23098, 23228, 23411, 257144, 257397, 259197, 26191, 26999, 27040, 2822, 2867, 3055, 3071, 3108, 3113, 3115, 3117, 3118, 3119, 3120, 3122, 3123, 3127, 340061, 3428, 353376, 3551, 3572, 3593, 3594, 3600, 3620, 3635, 3656, 3659, 3662, 36…
GO:0007411	axon guidance	GOBP	336	-0.0420321	0.770117	3.57083e-11	2.82542e-09	up in HPV(-)	10371, 10381, 103910, 10398, 10417, 10487, 10505, 10512, 10570, 1072, 11023, 123016, 1280, 1281, 1282, 1284, 1287, 1289, 1290, 1291, 1292, 1400, 1459, 1460, 148738, 170302, 1749, 1809, 1942, 1944, 1946, 1947, 1948, 1949, 2043, 2048, 2049, 2118, 2131, 22885, 23114, 23365, 23767, 23768, 2596, 2637, 2668, 2676, 27, 2736, 2817, 286, 3110, 3198, 323, 3265, 3312, 3320, 3326, 351, 3678, 3690, 3845, 388,…
GO:0097485	neuron projection guidance	GOBP	336	-0.0420321	0.770117	3.57083e-11	2.82542e-09	up in HPV(-)	10371, 10381, 103910, 10398, 10417, 10487, 10505, 10512, 10570, 1072, 11023, 123016, 1280, 1281, 1282, 1284, 1287, 1289, 1290, 1291, 1292, 1400, 1459, 1460, 148738, 170302, 1749, 1809, 1942, 1944, 1946, 1947, 1948, 1949, 2043, 2048, 2049, 2118, 2131, 22885, 23114, 23365, 23767, 23768, 2596, 2637, 2668, 2676, 27, 2736, 2817, 286, 3110, 3198, 323, 3265, 3312, 3320, 3326, 351, 3678, 3690, 3845, 388,…
GO:0007409	axonogenesis	GOBP	483	-0.036365	0.797723	3.7151e-11	2.89435e-09	up in HPV(-)	1009, 10211, 10371, 10381, 103910, 10398, 10417, 10458, 10487, 10494, 10505, 10512, 10570, 107, 1072, 11023, 123016, 1280, 1281, 1282, 1284, 1287, 1289, 1290, 1291, 1292, 1400, 1459, 1460, 148738, 150465, 170302, 1749, 1809, 1942, 1944, 1946, 1947, 1948, 1949, 2043, 2048, 2049, 2118, 2131, 2258, 22885, 23114, 23242, 2335, 23365, 23767, 23768, 2535, 25806, 2596, 25987, 2637, 2664, 2668, 2676, 27, …
GO:0007129	synapsis	GOBP	23	0.0650725	1.4984	4.12523e-11	3.16518e-09	up in HPV(+)	10388, 10734, 10919, 11144, 2177, 256126, 285498, 4292, 55706, 56154, 9985
GO:0007178	transmembrane receptor protein serine/threonine kinase signaling pathway	GOBP	259	-0.0462939	0.749988	4.24622e-11	3.20938e-09	up in HPV(-)	10272, 10468, 10979, 11167, 11171, 1278, 1281, 135228, 1460, 1482, 148738, 1749, 1761, 1874, 201163, 2200, 2201, 2280, 22938, 22943, 23089, 23213, 23625, 25805, 25928, 25937, 2626, 2719, 2734, 283149, 28996, 3209, 3309, 3491, 3624, 3625, 3654, 3693, 392255, 4052, 4488, 4609, 4624, 4738, 5045, 50515, 5054, 50964, 5154, 5155, 5159, 54829, 5499, 55273, 5654, 56937, 57154, 5796, 5829, 58533, 6422, 64…
GO:0044707	single-multicellular organism process	GOBP	4813	-0.0152066	0.909825	4.42021e-11	3.29175e-09	up in HPV(-)	100, 1000, 1001, 10016, 100506013, 10052, 10058, 1009, 10096, 10100, 1012, 10135, 10202, 1021, 10211, 10234, 10252, 10272, 10290, 10319, 10324, 10330, 10345, 10371, 10381, 103910, 10395, 10398, 1041, 10411, 10413, 10417, 10447, 10458, 10468, 10487, 10494, 10501, 10505, 1051, 10512, 10514, 10518, 1053, 10539, 10544, 10553, 10555, 10570, 10574, 10575, 10576, 10579, 10587, 10627, 10630, 10631, 10634…
GO:0002694	regulation of leukocyte activation	GOBP	345	0.0349694	1.24274	4.4877e-11	3.29358e-09	up in HPV(+)	10062, 10077, 101, 10148, 1029, 10385, 10461, 10673, 10859, 11151, 11314, 115650, 117157, 1236, 126259, 1268, 1269, 1326, 146206, 1493, 150372, 151888, 1725, 1880, 199, 201633, 2206, 2207, 2268, 22806, 2302, 2323, 23495, 2475, 26191, 27040, 29126, 29851, 30009, 3071, 3108, 3109, 3111, 3113, 3115, 3117, 3118, 3119, 3120, 3122, 3123, 3127, 3280, 3398, 3458, 355, 3559, 3572, 3574, 3593, 3594, 3600, …
GO:0003008	system process	GOBP	1095	-0.0256914	0.852432	5.75184e-11	4.13738e-09	up in HPV(-)	100, 1001, 10052, 10100, 10319, 10324, 10345, 10371, 103910, 10398, 10539, 10699, 107, 10725, 10769, 10804, 10810, 11133, 11171, 11202, 11281, 1131, 1144, 1146, 1160, 12, 123016, 124590, 1258, 1264, 1277, 1278, 1280, 129880, 1301, 1312, 1314, 132, 133, 136, 1410, 145226, 1482, 1490, 152, 16, 1613, 164312, 1645, 1674, 1687, 1727, 1827, 183, 1837, 1839, 185, 1874, 1906, 1909, 2010, 2028, 2048, 207,…
GO:0050870	positive regulation of T cell activation	GOBP	170	0.0424921	1.30222	5.80083e-11	4.13738e-09	up in HPV(+)	101, 10148, 10673, 10859, 11151, 115650, 1236, 126259, 1326, 146206, 1493, 151888, 1725, 199, 2475, 29126, 29851, 3071, 3108, 3109, 3113, 3115, 3117, 3118, 3119, 3120, 3122, 3123, 3127, 3280, 3458, 3559, 3572, 3574, 3593, 3594, 3600, 3683, 3964, 4067, 4179, 4602, 4690, 50943, 5133, 51561, 54440, 55340, 55423, 5777, 58515, 5879, 6352, 6363, 6693, 6776, 6850, 7186, 7292, 729230, 7409, 7412, 7535, 8…
GO:0002684	positive regulation of immune system process	GOBP	609	0.0289395	1.19704	6.17274e-11	4.34149e-09	up in HPV(+)	10062, 101, 10148, 10163, 10318, 10333, 10673, 10859, 11151, 11314, 115650, 117157, 118788, 1191, 1230, 1236, 1240, 126259, 1268, 1326, 1378, 1380, 146206, 1493, 150372, 151888, 1520, 1690, 1725, 1880, 199, 2185, 2206, 2207, 2208, 2209, 2219, 2268, 2302, 23098, 23228, 2323, 23411, 2475, 257144, 257397, 259197, 26191, 26999, 27040, 2822, 2867, 29126, 29851, 30009, 3055, 3071, 3108, 3109, 3113, 311…
GO:0031175	neuron projection development	GOBP	714	-0.0306327	0.826653	6.37155e-11	4.41994e-09	up in HPV(-)	1009, 10096, 10100, 10211, 10371, 10381, 103910, 10398, 10417, 10458, 10487, 10494, 10505, 10512, 10570, 107, 1072, 1073, 10938, 11023, 11075, 11202, 123016, 1280, 1281, 1282, 1284, 1287, 1289, 1290, 1291, 1292, 133, 1400, 1459, 1460, 148738, 150465, 1523, 1627, 170302, 1716, 1749, 1809, 1861, 1942, 1944, 1946, 1947, 1948, 1949, 2016, 2043, 2048, 2049, 207, 2118, 2131, 2182, 2258, 2288, 22885, 23…
GO:0032989	cellular component morphogenesis	GOBP	1054	-0.0260355	0.850611	6.46199e-11	4.4221e-09	up in HPV(-)	10059, 1009, 10096, 10109, 10211, 10319, 10324, 10371, 10381, 103910, 10395, 10398, 10417, 10435, 10458, 10487, 10494, 10505, 10512, 10570, 10602, 10627, 10630, 107, 1072, 1073, 10810, 10979, 11023, 11155, 11171, 11202, 114299, 114793, 118987, 121512, 122786, 123016, 1277, 1280, 1281, 1282, 1284, 1287, 1289, 1290, 1291, 1292, 129880, 1400, 145258, 1459, 1460, 147906, 1482, 148738, 150465, 1523, 1…
GO:0032943	mononuclear cell proliferation	GOBP	201	0.0404706	1.28596	7.52205e-11	5.07889e-09	up in HPV(+)	10148, 1029, 10385, 10673, 10859, 11151, 11314, 115650, 126259, 1380, 1435, 146206, 1493, 151888, 1725, 1794, 1880, 199, 22806, 2302, 23228, 23495, 26191, 27033, 29126, 3070, 3071, 3109, 3113, 3115, 3123, 3127, 3280, 3458, 3559, 3572, 3574, 3593, 3594, 3600, 3620, 3635, 3659, 3681, 3683, 3684, 401262, 4064, 4067, 4179, 4332, 4690, 50943, 51237, 51561, 5294, 54440, 5777, 58515, 596, 6304, 6352, 63…
GO:0046651	lymphocyte proliferation	GOBP	199	0.0404866	1.28609	8.59701e-11	5.72832e-09	up in HPV(+)	10148, 1029, 10385, 10673, 10859, 11151, 11314, 115650, 126259, 1380, 146206, 1493, 151888, 1725, 1794, 1880, 199, 22806, 2302, 23228, 23495, 26191, 27033, 29126, 3070, 3071, 3109, 3113, 3115, 3123, 3127, 3280, 3458, 3559, 3572, 3574, 3593, 3594, 3600, 3620, 3635, 3659, 3681, 3683, 3684, 401262, 4064, 4067, 4179, 4332, 4690, 50943, 51237, 51561, 5294, 54440, 5777, 58515, 596, 6304, 6352, 6363, 66…
GO:0051252	regulation of RNA metabolic process	GOBP	2961	0.0165484	1.10832	1.04153e-10	6.84977e-09	up in HPV(+)	10009, 100101467, 100128927, 100129654, 10013, 100131390, 100131827, 100289635, 100289678, 100316904, 10036, 10062, 101, 1017, 10181, 10194, 10224, 1027, 1028, 1029, 10318, 10336, 10389, 10472, 10475, 10481, 10499, 10521, 10522, 10538, 10595, 10600, 10614, 10628, 1063, 10636, 10656, 10657, 10745, 10768, 10781, 10782, 10847, 10859, 10865, 10915, 10919, 10943, 11040, 1105, 11063, 11074, 11100, 1116…
GO:0090092	regulation of transmembrane receptor protein serine/threonine kinase signaling pathway	GOBP	157	-0.054431	0.713005	1.36092e-10	8.83554e-09	up in HPV(-)	10272, 10468, 11171, 135228, 1460, 1761, 201163, 2200, 2201, 2280, 22938, 22943, 23089, 23213, 23625, 25805, 25928, 25937, 2626, 2719, 2734, 283149, 28996, 3209, 3309, 3491, 3624, 392255, 4052, 4488, 50515, 50964, 54829, 5499, 5654, 56937, 57154, 58533, 6422, 6423, 64750, 6498, 650, 652, 6664, 7040, 7041, 7046, 7048, 7057, 7080, 7316, 7474, 8312, 857, 858, 859, 8646, 90, 9241, 94031
GO:0030199	collagen fibril organization	GOBP	39	-0.0849866	0.58969	1.50407e-10	9.64126e-09	up in HPV(-)	1277, 1278, 1280, 1281, 1289, 1290, 1301, 140766, 2303, 302, 4010, 4017, 4060, 4320, 50509, 64175, 6423, 7046, 871, 8985, 9509
GO:0090287	regulation of cellular response to growth factor stimulus	GOBP	150	-0.055064	0.710205	1.74787e-10	1.1064e-08	up in HPV(-)	10016, 11171, 135228, 147372, 183, 1848, 201163, 2200, 2201, 22938, 23089, 23213, 23625, 25805, 26509, 2734, 2817, 283149, 28996, 3091, 3309, 3678, 3690, 4052, 4641, 4734, 4803, 50515, 5155, 54829, 5499, 55959, 5654, 56937, 56975, 57154, 58533, 64399, 64750, 6498, 6664, 7040, 7041, 7046, 7048, 7057, 7080, 7316, 7424, 7474, 79652, 81792, 8312, 858, 859, 860, 9241, 94031, 9982
GO:0007127	meiosis I	GOBP	59	0.0532786	1.39251	1.80183e-10	1.12648e-08	up in HPV(+)	10388, 10734, 10919, 11144, 150365, 2177, 256126, 25788, 26271, 285498, 2956, 3622, 378708, 4292, 4436, 4437, 50511, 55124, 55706, 56154, 5889, 7153, 7155, 9700, 9985
GO:0048646	anatomical structure formation involved in morphogenesis	GOBP	867	-0.0274965	0.842923	2.12713e-10	1.31363e-08	up in HPV(-)	100, 10016, 1012, 10324, 10395, 10411, 10512, 10553, 10655, 1072, 1073, 10787, 10913, 10938, 11155, 113026, 123016, 1277, 1280, 1282, 1284, 1289, 1290, 1291, 1295, 129880, 1301, 1306, 133, 14, 144165, 1464, 147372, 1482, 1490, 153572, 161882, 165904, 1749, 182, 183, 1848, 1874, 1896, 1906, 1909, 1942, 1948, 1950, 199221, 2028, 2048, 2049, 2050, 2069, 2132, 2152, 2201, 2274, 2280, 22873, 22885, 22…
GO:0030182	neuron differentiation	GOBP	985	-0.0260249	0.850667	2.26388e-10	1.38124e-08	up in HPV(-)	1009, 10096, 10100, 10211, 10371, 10381, 103910, 10398, 10417, 10458, 10487, 10494, 10505, 1051, 10512, 10570, 107, 1072, 1073, 10938, 11023, 11075, 11202, 123016, 124590, 1280, 1281, 1282, 1284, 1287, 1289, 1290, 1291, 1292, 133, 1400, 1459, 1460, 147040, 1482, 148738, 150465, 152, 1523, 1608, 1613, 1627, 1687, 170302, 1716, 1745, 1746, 1749, 1789, 1809, 182, 1861, 1942, 1944, 1946, 1947, 1948, …
GO:0006261	DNA-dependent DNA replication	GOBP	118	0.0454319	1.32623	2.49686e-10	1.50525e-08	up in HPV(+)	1017, 10714, 10721, 11284, 144455, 1763, 201973, 2237, 23649, 253714, 340533, 378708, 3978, 4171, 4172, 4173, 4174, 4175, 4176, 4796, 4998, 5111, 51426, 51455, 51659, 5422, 5424, 5426, 5427, 5429, 5983, 5984, 5985, 6118, 7153, 7155, 79733, 81620, 8243, 84296, 9126, 9134, 9837
GO:0007126	meiotic nuclear division	GOBP	137	0.0437903	1.31277	2.52678e-10	1.50537e-08	up in HPV(+)	10051, 1017, 10388, 10592, 10734, 10919, 11022, 11040, 11144, 122402, 143689, 150365, 151246, 151648, 162655, 2175, 2177, 24149, 245711, 256126, 25788, 26271, 27127, 285498, 286151, 2956, 29893, 3622, 378708, 400629, 4288, 4292, 4436, 4437, 4751, 50511, 55124, 55329, 55706, 56154, 5889, 7153, 7155, 7516, 8243, 8438, 84501, 8468, 85417, 89765, 9126, 9156, 9665, 9700, 9985
GO:0001944	vasculature development	GOBP	509	-0.0341762	0.808648	2.5566e-10	1.50542e-08	up in HPV(-)	1000, 10016, 10052, 1012, 10411, 10413, 10512, 10553, 10630, 113026, 1277, 1278, 1281, 1282, 1284, 1289, 1295, 1306, 133, 14, 1464, 147372, 1482, 1490, 1649, 1717, 1747, 182, 183, 1906, 1909, 1942, 1948, 1950, 196, 2028, 2048, 2049, 2050, 2069, 207, 2152, 2303, 2305, 2308, 23213, 2335, 23509, 2535, 255324, 2624, 2626, 2637, 2697, 2719, 27286, 28996, 290, 302, 306, 3091, 3164, 3198, 3209, 347, 349…
GO:0001568	blood vessel development	GOBP	481	-0.0348618	0.80521	2.96817e-10	1.67472e-08	up in HPV(-)	1000, 10016, 10052, 1012, 10411, 10413, 10512, 10553, 113026, 1277, 1278, 1281, 1282, 1284, 1289, 1295, 1306, 133, 14, 1464, 147372, 1482, 1490, 1649, 1717, 1747, 182, 183, 1906, 1909, 1942, 1948, 1950, 196, 2028, 2048, 2049, 2050, 2069, 207, 2152, 2303, 2305, 2308, 23213, 2335, 23509, 255324, 2624, 2626, 2637, 2697, 2719, 27286, 28996, 290, 302, 306, 3091, 3164, 3198, 3209, 347, 3491, 3552, 3569…
GO:0002682	regulation of immune system process	GOBP	985	0.0236473	1.15831	2.92104e-10	1.67472e-08	up in HPV(+)	10062, 10077, 101, 10125, 10148, 10163, 10219, 10225, 1027, 1029, 10318, 10333, 10385, 10461, 10475, 10673, 10859, 10870, 10906, 11006, 11126, 11151, 11240, 11314, 115650, 116, 117157, 118788, 1191, 120425, 1230, 1236, 1240, 126259, 1268, 1269, 131450, 1326, 133522, 134, 1378, 1380, 140685, 1435, 146206, 1493, 150372, 1512, 151888, 1520, 152831, 1690, 1725, 1794, 1880, 192670, 199, 200316, 201633…
GO:0006355	regulation of transcription, DNA-templated	GOBP	2847	0.0163374	1.10686	2.88454e-10	1.67472e-08	up in HPV(+)	10009, 100101467, 100128927, 100129654, 10013, 100131390, 100131827, 100289635, 100289678, 100316904, 10036, 10062, 101, 1017, 10194, 10224, 1027, 1028, 1029, 10318, 10336, 10389, 10472, 10475, 10481, 10499, 10521, 10522, 10538, 10595, 10600, 10614, 10628, 1063, 10636, 10656, 10657, 10745, 10781, 10782, 10847, 10859, 10865, 10915, 10919, 10943, 11040, 1105, 11063, 11074, 11100, 11168, 11218, 1123…
GO:0051216	cartilage development	GOBP	153	-0.0541384	0.714302	2.97639e-10	1.67472e-08	up in HPV(-)	11173, 116039, 1277, 1280, 1300, 1301, 1311, 1490, 1746, 1906, 23213, 2734, 2736, 2778, 3091, 3207, 3237, 3491, 353500, 4017, 4060, 4256, 4322, 4488, 50515, 5081, 51450, 5447, 5578, 55959, 5744, 5745, 5914, 5970, 6423, 64764, 649, 650, 652, 658, 6591, 6615, 6660, 7040, 7045, 7046, 7048, 7057, 7067, 7474, 7476, 7477, 7481, 8091, 81029, 81792, 860, 871, 9241, 960
GO:0051251	positive regulation of lymphocyte activation	GOBP	216	0.0386621	1.27159	3.21175e-10	1.7811e-08	up in HPV(+)	101, 10148, 10673, 10859, 11151, 115650, 1236, 126259, 1326, 146206, 1493, 151888, 1725, 1880, 199, 2323, 2475, 29126, 29851, 30009, 3071, 3108, 3109, 3113, 3115, 3117, 3118, 3119, 3120, 3122, 3123, 3127, 3280, 3458, 3559, 3572, 3574, 3593, 3594, 3600, 3635, 3683, 3964, 4067, 4179, 4602, 4690, 50943, 5133, 51561, 54440, 55340, 55423, 5777, 58515, 5879, 596, 6352, 6363, 6693, 6776, 6850, 695, 7186…
GO:1903046	meiotic cell cycle process	GOBP	72	0.0506326	1.3698	3.23581e-10	1.7811e-08	up in HPV(+)	10051, 10388, 10592, 10734, 10919, 11144, 150365, 151246, 151648, 2177, 256126, 25788, 26271, 285498, 2956, 3622, 378708, 4292, 4436, 4437, 50511, 55124, 55706, 56154, 5889, 7153, 7155, 84501, 9700, 9985
GO:0051171	regulation of nitrogen compound metabolic process	GOBP	3728	0.0149992	1.0977	4.06956e-10	2.21594e-08	up in HPV(+)	10009, 100101467, 100128927, 100129654, 10013, 100131390, 100131827, 100271715, 100289635, 100289678, 100316904, 10036, 10044, 10062, 101, 10125, 1017, 10181, 10194, 10224, 10235, 10266, 1027, 1028, 1029, 10318, 10336, 10347, 10389, 10472, 10475, 10481, 10499, 10521, 10522, 10538, 10564, 10595, 10600, 10614, 10628, 1063, 10636, 10641, 10656, 10657, 10745, 10768, 10781, 10782, 10847, 10859, 10865,…
GO:0006351	transcription, DNA-templated	GOBP	2949	0.015957	1.10425	4.78212e-10	2.57624e-08	up in HPV(+)	10009, 100101467, 100128927, 100129654, 10013, 100131390, 100131827, 100289635, 100289678, 100316904, 10036, 10062, 101, 1017, 10194, 10224, 10250, 1027, 1028, 1029, 10318, 10336, 10389, 10472, 10475, 10481, 10499, 10521, 10522, 10538, 10595, 10600, 10614, 10628, 1063, 10636, 10656, 10657, 10745, 10781, 10782, 10847, 10859, 10865, 10915, 10919, 10943, 11040, 1105, 11063, 11074, 11100, 11168, 1121…
GO:0070661	leukocyte proliferation	GOBP	210	0.0386279	1.27132	5.1287e-10	2.73387e-08	up in HPV(+)	10148, 1029, 10385, 10673, 10859, 11151, 11314, 115650, 1191, 126259, 1380, 1435, 146206, 1493, 151888, 1725, 1794, 1880, 199, 22806, 2302, 23228, 23495, 26191, 27033, 29126, 3070, 3071, 3109, 3113, 3115, 3123, 3127, 3280, 3458, 3559, 3572, 3574, 3593, 3594, 3600, 3620, 3635, 3659, 3681, 3683, 3684, 3815, 401262, 4064, 4067, 4179, 4254, 4332, 4690, 50943, 51237, 51561, 5294, 54440, 5777, 58515, 5…
GO:0002062	chondrocyte differentiation	GOBP	79	-0.0669939	0.659455	5.47756e-10	2.88942e-08	up in HPV(-)	11173, 116039, 1280, 1301, 1490, 23213, 2734, 2736, 3207, 3237, 4017, 4488, 50515, 5447, 5578, 55959, 5744, 5745, 5970, 6423, 64764, 650, 652, 658, 6591, 6660, 7040, 7045, 7046, 7476, 8091, 81029, 81792, 860, 871
GO:0048699	generation of neurons	GOBP	1072	-0.0245748	0.858368	5.57461e-10	2.91029e-08	up in HPV(-)	1009, 10096, 10100, 1021, 10211, 10371, 10381, 103910, 10398, 10417, 10458, 10487, 10494, 10505, 1051, 10512, 10570, 107, 1072, 1073, 10938, 11023, 11075, 11202, 123016, 124590, 1280, 1281, 1282, 1284, 1287, 1289, 1290, 1291, 1292, 133, 1400, 1459, 1460, 147040, 1482, 148738, 150465, 152, 1523, 1608, 1613, 1627, 1687, 170302, 1716, 1745, 1746, 1749, 1789, 1809, 182, 1861, 1942, 1944, 1946, 1947, …
GO:0022411	cellular component disassembly	GOBP	417	-0.0364188	0.797456	5.66143e-10	2.92546e-08	up in HPV(-)	10059, 10134, 10211, 10634, 1072, 1073, 10783, 10904, 11075, 11096, 11224, 119, 1277, 1278, 1280, 1281, 1282, 1284, 1287, 1288, 1289, 1290, 1291, 1292, 1295, 1300, 1301, 1305, 1306, 1308, 1471, 1513, 1514, 1515, 176, 1828, 1984, 2010, 2150, 2191, 2197, 2200, 2201, 2258, 2335, 23708, 24144, 28985, 2934, 3084, 329, 3312, 3396, 3831, 3909, 3912, 3915, 3918, 4000, 4137, 4312, 4313, 4314, 4316, 4319, …
GO:2001141	regulation of RNA biosynthetic process	GOBP	2883	0.0159288	1.10406	6.70519e-10	3.42981e-08	up in HPV(+)	10009, 100101467, 100128927, 100129654, 10013, 100131390, 100131827, 100289635, 100289678, 100316904, 10036, 10062, 101, 1017, 10194, 10224, 1027, 1028, 1029, 10318, 10336, 10389, 10472, 10475, 10481, 10499, 10521, 10522, 10538, 10595, 10600, 10614, 10628, 1063, 10636, 10656, 10657, 10745, 10781, 10782, 10847, 10859, 10865, 10915, 10919, 10943, 11040, 1105, 11063, 11074, 11100, 11168, 11218, 1123…
GO:0090101	negative regulation of transmembrane receptor protein serine/threonine kinase signaling pathway	GOBP	92	-0.0634623	0.674089	6.94837e-10	3.51865e-08	up in HPV(-)	10272, 10468, 11171, 135228, 2200, 2201, 22943, 23089, 23625, 25805, 25928, 2734, 283149, 28996, 3309, 4052, 50515, 50964, 54829, 5499, 5654, 56937, 57154, 58533, 6422, 6423, 64750, 6498, 7040, 7041, 7046, 7048, 7080, 7316, 7474, 857, 858, 8646, 90, 9241, 94031
GO:0010556	regulation of macromolecule biosynthetic process	GOBP	3205	0.0153264	1.09993	8.70367e-10	4.3639e-08	up in HPV(+)	10009, 100101467, 100128927, 100129654, 10013, 100131390, 100131827, 100289635, 100289678, 100316904, 10036, 10062, 101, 10148, 1017, 10194, 10224, 1027, 1028, 1029, 10318, 10333, 10336, 10347, 10389, 10472, 10475, 10481, 10499, 10521, 10522, 10538, 10595, 10600, 10614, 10628, 1063, 10636, 10656, 10657, 10745, 10781, 10782, 10847, 10859, 10865, 10915, 10919, 10943, 11040, 1105, 11063, 11074, 1110…
GO:0007130	synaptonemal complex assembly	GOBP	13	0.0690266	1.53568	9.11531e-10	4.52548e-08	up in HPV(+)	10388, 10734, 10919, 256126, 56154
GO:0051321	meiotic cell cycle	GOBP	145	0.0420629	1.29875	1.09161e-09	5.36693e-08	up in HPV(+)	10051, 1017, 10388, 10592, 10734, 10919, 11022, 11040, 11144, 122402, 143689, 150365, 151246, 151648, 162655, 2175, 2177, 24149, 245711, 256126, 25788, 26271, 27127, 285498, 286151, 2956, 29893, 3622, 378708, 400629, 4288, 4292, 4436, 4437, 4751, 4880, 50511, 55124, 55329, 55706, 56154, 5889, 7153, 7155, 7516, 8243, 8438, 84501, 8468, 85417, 89765, 9126, 9156, 9665, 9700, 9985
GO:0002252	immune effector process	GOBP	502	0.0290271	1.19769	1.14946e-09	5.59699e-08	up in HPV(+)	10077, 10125, 10163, 10333, 10475, 10538, 10859, 11314, 117157, 1191, 127544, 1378, 1380, 140564, 1512, 1524, 159296, 1621, 164668, 1794, 1880, 200315, 200316, 2185, 2206, 2207, 2208, 2209, 2219, 2268, 22904, 2302, 23228, 2529, 255520, 259197, 25939, 26999, 27040, 27350, 2867, 2956, 30009, 3055, 3108, 3109, 3119, 3120, 3123, 3127, 340061, 3428, 3454, 3458, 355, 3559, 3588, 3593, 3594, 3600, 3609,…
GO:2000112	regulation of cellular macromolecule biosynthetic process	GOBP	3123	0.0152573	1.09946	1.37031e-09	6.60881e-08	up in HPV(+)	10009, 100101467, 100128927, 100129654, 10013, 100131390, 100131827, 100289635, 100289678, 100316904, 10036, 10062, 101, 1017, 10194, 10224, 1027, 1028, 1029, 10318, 10336, 10347, 10389, 10472, 10475, 10481, 10499, 10521, 10522, 10538, 10595, 10600, 10614, 10628, 1063, 10636, 10656, 10657, 10745, 10781, 10782, 10847, 10859, 10865, 10915, 10919, 10943, 11040, 1105, 11063, 11074, 11100, 11168, 1121…
GO:0031294	lymphocyte costimulation	GOBP	67	0.0502313	1.36638	1.39817e-09	6.61715e-08	up in HPV(+)	10673, 115650, 1236, 126259, 1326, 1493, 151888, 2475, 29126, 29851, 3113, 3115, 3117, 3118, 3119, 3120, 3122, 3123, 3127, 3964, 4067, 5133, 5777, 5879, 6363, 6693, 7292, 7409, 84433, 8764, 9020, 915, 916, 920, 921, 940, 9402, 942
GO:0031295	T cell costimulation	GOBP	67	0.0502313	1.36638	1.39817e-09	6.61715e-08	up in HPV(+)	10673, 115650, 1236, 126259, 1326, 1493, 151888, 2475, 29126, 29851, 3113, 3115, 3117, 3118, 3119, 3120, 3122, 3123, 3127, 3964, 4067, 5133, 5777, 5879, 6363, 6693, 7292, 7409, 84433, 8764, 9020, 915, 916, 920, 921, 940, 9402, 942
GO:0040011	locomotion	GOBP	1255	-0.0224598	0.869725	1.41518e-09	6.63562e-08	up in HPV(-)	100, 1000, 10016, 100506013, 10082, 1012, 1021, 10344, 10371, 10381, 103910, 10395, 10398, 10410, 10417, 10487, 10505, 10512, 10570, 10630, 1072, 10787, 11009, 11023, 11171, 112616, 123016, 123920, 1277, 1278, 1280, 1281, 1282, 1284, 1287, 1289, 1290, 1291, 1292, 131578, 14, 1400, 140885, 1459, 1460, 1462, 146223, 1464, 147372, 147495, 148738, 1490, 152189, 1613, 1673, 170302, 1749, 1761, 1809, 1…
GO:0048666	neuron development	GOBP	810	-0.0270043	0.845505	1.45225e-09	6.74695e-08	up in HPV(-)	1009, 10096, 10100, 10211, 10371, 10381, 103910, 10398, 10417, 10458, 10487, 10494, 10505, 10512, 10570, 107, 1072, 1073, 10938, 11023, 11075, 11202, 123016, 1280, 1281, 1282, 1284, 1287, 1289, 1290, 1291, 1292, 133, 1400, 1459, 1460, 148738, 150465, 1523, 1608, 1627, 170302, 1716, 1749, 1809, 1861, 1942, 1944, 1946, 1947, 1948, 1949, 2016, 2019, 2043, 2048, 2049, 207, 2118, 2131, 2182, 2258, 228…
GO:0006281	DNA repair	GOBP	386	0.0314556	1.2159	1.53163e-09	6.98756e-08	up in HPV(+)	10036, 10075, 1017, 10309, 1032, 10535, 10714, 10721, 11073, 11277, 11284, 113510, 121642, 131870, 133746, 142, 143, 144715, 157570, 1643, 1763, 201299, 201973, 2139, 2140, 2175, 2176, 2177, 2178, 2187, 2237, 22909, 23137, 23411, 253714, 25788, 26122, 27033, 28990, 29072, 29128, 2956, 3148, 3150, 340533, 348654, 378708, 3978, 4292, 4436, 4437, 4796, 493861, 4968, 5111, 51426, 51455, 51514, 5378, …
GO:0050865	regulation of cell activation	GOBP	370	0.0318922	1.2192	1.51862e-09	6.98756e-08	up in HPV(+)	10062, 10077, 101, 10148, 1029, 10385, 10461, 10673, 10859, 11151, 11314, 115650, 117157, 1236, 126259, 1268, 1269, 1326, 146206, 1493, 150372, 151888, 1725, 1880, 199, 201633, 2039, 2206, 2207, 2268, 22806, 2302, 2323, 23495, 2475, 26191, 27040, 29126, 29851, 30009, 3071, 3108, 3109, 3111, 3113, 3115, 3117, 3118, 3119, 3120, 3122, 3123, 3127, 3280, 3398, 3458, 348, 355, 3559, 3572, 3574, 3593, 3…
GO:0006312	mitotic recombination	GOBP	37	0.0565609	1.4212	1.61525e-09	7.30322e-08	up in HPV(+)	10714, 1763, 2237, 23137, 23649, 25788, 348654, 3978, 4292, 5111, 5422, 5424, 5426, 5427, 5983, 5984, 5985, 6118, 7153, 7155, 79677
GO:0055002	striated muscle cell development	GOBP	128	-0.0557595	0.707142	1.651e-09	7.3988e-08	up in HPV(-)	10290, 10324, 1073, 11155, 144165, 1482, 150572, 1649, 165904, 1827, 183, 1906, 2274, 23363, 246329, 2626, 26287, 27063, 27231, 3399, 3486, 4000, 4205, 4621, 4624, 4628, 463, 4633, 4656, 5159, 57462, 58, 58529, 64754, 652, 6608, 6722, 6926, 70, 7040, 71, 7139, 7168, 7273, 779, 8048, 84665, 8557, 858, 859, 91624, 91653, 92737, 9472
GO:0055007	cardiac muscle cell differentiation	GOBP	77	-0.066182	0.662791	1.68379e-09	7.47958e-08	up in HPV(-)	10290, 144165, 1482, 165904, 183, 1948, 2274, 22943, 23135, 23363, 2626, 3084, 4000, 4205, 4624, 4628, 4633, 50507, 5159, 5914, 650, 652, 6722, 6926, 70, 7273, 8048, 8557, 859, 90, 91624, 9472
GO:0002696	positive regulation of leukocyte activation	GOBP	231	0.0367007	1.25619	1.76091e-09	7.75414e-08	up in HPV(+)	101, 10148, 10673, 10859, 11151, 115650, 1236, 126259, 1326, 146206, 1493, 151888, 1725, 1880, 199, 2206, 2207, 2268, 2323, 2475, 29126, 29851, 30009, 3071, 3108, 3109, 3113, 3115, 3117, 3118, 3119, 3120, 3122, 3123, 3127, 3280, 3458, 3559, 3572, 3574, 3593, 3594, 3600, 3635, 3683, 3964, 4067, 4179, 4602, 4690, 50943, 5133, 51561, 54440, 55340, 55423, 5777, 58515, 5879, 596, 6352, 6363, 6693, 677…
GO:0006310	DNA recombination	GOBP	199	0.0382632	1.26844	1.82343e-09	7.95799e-08	up in HPV(+)	10538, 10714, 11144, 11277, 113510, 1763, 201299, 2237, 22909, 23137, 23649, 253714, 25788, 285498, 2956, 29893, 30009, 3148, 3458, 348654, 378708, 3978, 4292, 4436, 4437, 4796, 493861, 50943, 5111, 5422, 5424, 5426, 5427, 54891, 56154, 56852, 57379, 5889, 5983, 5984, 5985, 6118, 63979, 6419, 64421, 672, 6932, 7153, 7155, 7292, 7374, 7516, 79677, 79725, 79728, 8438, 8741, 9156, 940, 9466, 959, 97…
GO:0042098	T cell proliferation	GOBP	143	0.0418077	1.29669	1.83863e-09	7.95799e-08	up in HPV(+)	10148, 1029, 10385, 10673, 10859, 11151, 115650, 126259, 146206, 1493, 151888, 1725, 1794, 199, 2302, 27033, 29126, 3071, 3109, 3113, 3115, 3123, 3127, 3280, 3458, 3559, 3572, 3593, 3594, 3600, 3620, 3659, 3681, 3683, 3684, 401262, 4179, 4690, 50943, 51561, 5294, 54440, 5777, 58515, 6304, 6352, 6363, 6693, 6776, 6850, 7157, 7292, 729230, 7293, 7356, 7412, 7535, 7852, 81704, 836, 84433, 8764, 896,…
GO:0050867	positive regulation of cell activation	GOBP	240	0.036254	1.2527	1.86212e-09	7.99132e-08	up in HPV(+)	101, 10148, 10673, 10859, 11151, 115650, 1236, 126259, 1326, 146206, 1493, 151888, 1725, 1880, 199, 2206, 2207, 2268, 2323, 2475, 29126, 29851, 30009, 3071, 3108, 3109, 3113, 3115, 3117, 3118, 3119, 3120, 3122, 3123, 3127, 3280, 3458, 3559, 3572, 3574, 3593, 3594, 3600, 3635, 3683, 3717, 3964, 4067, 4179, 4602, 4690, 50943, 5133, 51561, 5341, 54440, 55340, 55423, 5777, 58515, 5879, 596, 6352, 636…
GO:0060047	heart contraction	GOBP	141	-0.0536262	0.71658	2.07989e-09	8.8509e-08	up in HPV(-)	100, 10345, 10371, 10539, 133, 1482, 1490, 1674, 1839, 1906, 23630, 2626, 27129, 3270, 3728, 3753, 3768, 4205, 4624, 4625, 4632, 4633, 4634, 4635, 477, 4842, 5350, 5578, 55800, 5606, 6271, 6324, 6327, 6330, 6331, 6640, 6717, 70, 7054, 7067, 7134, 7137, 7139, 7168, 7273, 7531, 775, 8048, 817, 845, 8557, 857, 859, 8912, 9446
GO:0003015	heart process	GOBP	142	-0.0533467	0.717825	2.36593e-09	9.90171e-08	up in HPV(-)	100, 10345, 10371, 10539, 133, 1482, 1490, 1674, 1839, 1906, 23630, 2626, 27129, 3270, 3728, 3753, 3768, 4205, 4624, 4625, 4632, 4633, 4634, 4635, 477, 4842, 5350, 5578, 55800, 5606, 6271, 6324, 6327, 6330, 6331, 6640, 6717, 70, 7054, 7067, 7134, 7137, 7139, 7168, 7273, 7531, 775, 8048, 817, 845, 8557, 857, 859, 8912, 9446
GO:0006139	nucleobase-containing compound metabolic process	GOBP	5350	0.0133423	1.08645	2.35798e-09	9.90171e-08	up in HPV(+)	10009, 100101467, 100128927, 100129654, 10013, 100131390, 100131827, 10020, 100271715, 100289635, 100289678, 100316904, 10036, 10044, 10051, 10062, 10075, 101, 10112, 10125, 1017, 10181, 10194, 10224, 10235, 10236, 10250, 10266, 1027, 10270, 1028, 10283, 1029, 10309, 10318, 1032, 10336, 10347, 10352, 10380, 10389, 10472, 10475, 10481, 10499, 105, 10521, 10522, 10533, 10535, 10538, 10564, 10592, 1…
GO:0034641	cellular nitrogen compound metabolic process	GOBP	5668	0.0132337	1.08572	2.60014e-09	1.07927e-07	up in HPV(+)	10009, 100101467, 100128927, 100129654, 10013, 100131390, 100131827, 10020, 100271715, 100289635, 100289678, 100316904, 10036, 10044, 10051, 10062, 10075, 101, 10112, 10125, 10157, 1017, 10181, 10194, 10224, 10235, 10236, 10250, 10266, 1027, 10270, 1028, 10283, 1029, 10309, 10318, 1032, 10336, 10347, 10352, 10380, 10389, 10390, 10472, 10475, 10481, 10499, 105, 10521, 10522, 10533, 10535, 10538, 1…
GO:0060048	cardiac muscle contraction	GOBP	71	-0.0672563	0.658381	2.87508e-09	1.18369e-07	up in HPV(-)	1482, 1490, 23630, 2626, 3270, 4632, 4633, 4634, 4635, 477, 4842, 5350, 55800, 5606, 6324, 6327, 6330, 6331, 6717, 70, 7134, 7137, 7168, 7273, 775, 8048, 817, 845, 8557, 859, 9446
GO:0006259	DNA metabolic process	GOBP	811	0.0239917	1.16079	2.95402e-09	1.20638e-07	up in HPV(+)	10036, 10051, 10075, 1017, 10270, 1029, 10309, 1032, 10535, 10538, 10592, 10595, 1063, 10714, 10721, 10919, 11022, 1105, 11073, 11144, 11277, 11284, 113510, 114799, 121642, 122402, 124751, 131870, 133746, 140564, 142, 143, 143689, 144455, 144715, 148479, 157570, 163589, 1643, 164668, 1677, 1763, 1776, 1777, 1786, 1788, 1854, 200315, 200316, 201299, 201973, 2139, 2140, 2146, 2175, 2176, 2177, 2178…
GO:0030183	B cell differentiation	GOBP	83	0.0472776	1.34153	3.02371e-09	1.22496e-07	up in HPV(+)	1380, 150372, 159296, 170575, 1880, 2185, 22806, 23228, 29760, 3071, 3087, 3120, 3398, 3635, 3676, 3718, 3815, 3964, 4066, 4436, 4602, 53335, 57379, 5777, 596, 602, 64421, 6776, 6850, 695, 7157, 7253, 7412, 8326, 84433, 939, 959, 973, 9730
GO:0032501	multicellular organismal process	GOBP	4957	-0.0135235	0.919391	3.22009e-09	1.28398e-07	up in HPV(-)	100, 1000, 1001, 10016, 100506013, 10052, 10058, 1009, 10096, 10100, 1012, 10134, 10135, 10202, 1021, 10211, 10234, 10252, 10272, 10290, 10319, 10324, 10330, 10345, 10371, 10381, 103910, 10395, 10398, 1041, 10411, 10413, 10417, 10447, 10458, 10468, 10487, 10494, 10501, 10505, 1051, 10512, 10514, 10518, 1053, 10539, 10544, 10553, 10555, 10570, 10574, 10575, 10576, 10579, 10587, 10627, 10630, 10631…
GO:0046483	heterocycle metabolic process	GOBP	5476	0.0131947	1.08546	3.19967e-09	1.28398e-07	up in HPV(+)	10009, 100101467, 100128927, 100129654, 10013, 100131390, 100131827, 10020, 100271715, 100289635, 100289678, 100316904, 10036, 10044, 10051, 10062, 10075, 101, 10112, 10125, 1017, 10181, 10194, 10224, 10235, 10236, 10243, 10250, 10266, 1027, 10270, 1028, 10283, 1029, 10309, 10318, 1032, 10336, 10347, 10352, 10380, 10389, 10472, 10475, 10481, 10499, 105, 10521, 10522, 10533, 10535, 10538, 10564, 1…
GO:0002429	immune response-activating cell surface receptor signaling pathway	GOBP	201	0.0376978	1.26399	3.32237e-09	1.31441e-07	up in HPV(+)	10163, 11314, 1236, 1378, 1380, 146206, 1493, 150372, 2207, 2209, 2219, 2268, 23228, 257144, 26191, 26999, 27040, 2822, 2867, 3055, 3071, 3113, 3115, 3117, 3118, 3119, 3120, 3122, 3123, 3127, 3551, 3635, 3702, 3708, 387357, 3937, 4067, 4277, 4332, 4690, 4790, 4792, 50852, 50943, 5142, 51517, 5291, 53347, 54900, 54923, 5579, 5581, 5777, 5795, 5879, 596, 640, 6850, 695, 719, 7294, 7409, 7454, 7456,…
GO:0046631	alpha-beta T cell activation	GOBP	88	0.0465597	1.33556	3.35846e-09	1.31839e-07	up in HPV(+)	10148, 10538, 10859, 11314, 151888, 159296, 1794, 2529, 3071, 3120, 3458, 3593, 3594, 3600, 3659, 3662, 3702, 3718, 4602, 5075, 50943, 51561, 54440, 55340, 5734, 596, 5971, 602, 6097, 6304, 6363, 64218, 6850, 6932, 7292, 729230, 7294, 7535, 8320, 8546, 8764, 916, 9308, 940, 942, 944
GO:0000722	telomere maintenance via recombination	GOBP	26	0.0597765	1.44989	3.39617e-09	1.32294e-07	up in HPV(+)	10714, 1763, 2237, 23137, 23649, 3978, 5111, 5422, 5424, 5426, 5427, 5983, 5984, 5985, 6118, 79677
GO:0031326	regulation of cellular biosynthetic process	GOBP	3318	0.0145983	1.09497	3.57707e-09	1.38277e-07	up in HPV(+)	10009, 100101467, 100128927, 100129654, 10013, 100131390, 100131827, 100289635, 100289678, 100316904, 10036, 10062, 101, 10148, 1017, 10194, 10224, 10266, 1027, 1028, 1029, 10318, 10333, 10336, 10347, 10389, 10472, 10475, 10481, 10499, 10521, 10522, 10538, 10595, 10600, 10614, 10628, 1063, 10636, 10656, 10657, 10745, 10781, 10782, 10847, 10859, 10865, 10915, 10919, 10943, 11040, 1105, 11063, 1107…
GO:0070193	synaptonemal complex organization	GOBP	15	0.0659189	1.50631	3.74086e-09	1.43513e-07	up in HPV(+)	10388, 10734, 10919, 256126, 56154
GO:0061448	connective tissue development	GOBP	194	-0.0470828	0.74632	3.79461e-09	1.4448e-07	up in HPV(-)	11173, 116039, 1277, 1280, 1289, 1300, 1301, 1311, 1490, 1746, 1906, 2303, 23213, 2734, 2736, 2778, 3091, 3170, 3207, 3237, 3491, 353500, 38, 4017, 4060, 4256, 4322, 4488, 50515, 5081, 51450, 5155, 5159, 5447, 5467, 5578, 55959, 5744, 5745, 59, 5914, 5970, 6423, 64764, 649, 650, 652, 658, 6591, 6615, 6660, 7040, 7045, 7046, 7048, 7057, 7067, 7474, 7476, 7477, 7481, 79068, 8091, 81029, 81792, 860,…
GO:0002757	immune response-activating signal transduction	GOBP	334	0.0322798	1.22214	3.83573e-09	1.44956e-07	up in HPV(+)	10062, 101, 10163, 10318, 10333, 11314, 118788, 1236, 1378, 1380, 146206, 1493, 150372, 1520, 2207, 2209, 2219, 2268, 23098, 23228, 257144, 257397, 26191, 26999, 27040, 2822, 2867, 3055, 3071, 3113, 3115, 3117, 3118, 3119, 3120, 3122, 3123, 3127, 353376, 3551, 3635, 3656, 3659, 3662, 3684, 3689, 3702, 3708, 387357, 3937, 4067, 409, 4214, 4277, 4332, 4690, 4790, 4791, 4792, 50852, 50943, 51135, 51…
GO:0032774	RNA biosynthetic process	GOBP	3057	0.0148964	1.097	4.08697e-09	1.53307e-07	up in HPV(+)	10009, 100101467, 100128927, 100129654, 10013, 100131390, 100131827, 100289635, 100289678, 100316904, 10036, 10062, 101, 1017, 10194, 10224, 10250, 1027, 1028, 1029, 10318, 10336, 10389, 10472, 10475, 10481, 10499, 10521, 10522, 10533, 10538, 10595, 10600, 10614, 10628, 1063, 10636, 10656, 10657, 10745, 10781, 10782, 10847, 10859, 10865, 10915, 10919, 10943, 11040, 1105, 11063, 11074, 11100, 1116…
GO:0002253	activation of immune response	GOBP	368	0.031238	1.21426	4.15121e-09	1.54572e-07	up in HPV(+)	10062, 101, 10163, 10318, 10333, 11314, 118788, 1191, 1236, 1378, 1380, 146206, 1493, 150372, 1520, 2207, 2209, 2219, 2268, 23098, 23228, 257144, 257397, 26191, 26999, 27040, 2822, 2867, 3055, 3071, 3113, 3115, 3117, 3118, 3119, 3120, 3122, 3123, 3127, 340061, 3428, 353376, 3551, 3635, 3656, 3659, 3662, 3684, 3689, 3702, 3708, 387357, 3937, 4067, 409, 4179, 4214, 4277, 4332, 4690, 4790, 4791, 479…
GO:0002009	morphogenesis of an epithelium	GOBP	381	-0.0359504	0.799781	4.55669e-09	1.68431e-07	up in HPV(-)	10371, 10395, 10413, 10512, 1072, 10787, 11331, 1282, 1289, 129880, 133, 144165, 1460, 1482, 153572, 170690, 182, 183, 1839, 1861, 1906, 1909, 1950, 2118, 2119, 2295, 2303, 23213, 23242, 2535, 25928, 2626, 2637, 2668, 2697, 2719, 2736, 28514, 3091, 3170, 3207, 3209, 3217, 3237, 3265, 341640, 3491, 3569, 3678, 3728, 374, 3845, 3872, 3976, 4233, 4323, 4488, 4609, 4776, 5058, 5077, 51384, 5154, 5155…
GO:0033260	nuclear cell cycle DNA replication	GOBP	34	0.0565564	1.42116	4.62171e-09	1.69597e-07	up in HPV(+)	10714, 1763, 2237, 23649, 3978, 5111, 5422, 5424, 5426, 5427, 5983, 5984, 5985, 6118, 7884, 81620, 91603
GO:0007275	multicellular organismal development	GOBP	3738	-0.0143445	0.914713	4.9293e-09	1.79583e-07	up in HPV(-)	100, 1000, 1001, 10016, 100506013, 10052, 10058, 1009, 10096, 10100, 1012, 10202, 1021, 10211, 10234, 10252, 10272, 10290, 10319, 10324, 10371, 10381, 103910, 10395, 10398, 1041, 10411, 10413, 10417, 10447, 10458, 10468, 10487, 10494, 10501, 10505, 1051, 10512, 1053, 10553, 10555, 10570, 10579, 10587, 10630, 10631, 10634, 10655, 107, 1072, 1073, 10787, 10804, 10810, 10913, 10938, 10959, 10971, 10…
GO:0032944	regulation of mononuclear cell proliferation	GOBP	155	0.0401386	1.28331	5.06703e-09	1.83282e-07	up in HPV(+)	10148, 1029, 10385, 10673, 10859, 11151, 11314, 115650, 126259, 1435, 146206, 1493, 151888, 1725, 1880, 199, 22806, 2302, 23495, 26191, 29126, 3071, 3109, 3113, 3115, 3123, 3127, 3280, 3458, 3559, 3572, 3574, 3593, 3594, 3600, 3620, 3635, 3659, 3683, 4067, 4179, 4332, 4690, 50943, 51237, 51561, 54440, 5777, 58515, 596, 6352, 6363, 6693, 6776, 6850, 7292, 729230, 7293, 7356, 7412, 7535, 7940, 836,…
GO:0032502	developmental process	GOBP	4296	-0.013784	0.917904	5.12993e-09	1.84241e-07	up in HPV(-)	100, 1000, 1001, 10016, 100506013, 10052, 10058, 10059, 1009, 10096, 10100, 10109, 1012, 1013, 10202, 1021, 10211, 10234, 10252, 10272, 10290, 10319, 10324, 10345, 10371, 10381, 103910, 10395, 10398, 1041, 10411, 10413, 10417, 10435, 10447, 10458, 10468, 10487, 10493, 10494, 10501, 10505, 1051, 10512, 10514, 1053, 10553, 10555, 10570, 10579, 10587, 10602, 10627, 10630, 10631, 10634, 10644, 10655,…
GO:0019538	protein metabolic process	GOBP	4069	-0.0139721	0.916832	5.27755e-09	1.87847e-07	up in HPV(-)	10016, 10049, 10056, 10071, 10072, 10082, 10090, 10102, 10105, 10128, 10130, 10134, 10188, 10196, 10197, 1021, 10213, 1022, 10290, 10294, 10295, 10299, 10324, 10381, 10395, 10411, 10440, 10452, 10467, 10471, 10477, 10480, 10484, 10489, 10494, 1051, 10525, 1053, 10531, 10573, 10574, 10575, 10576, 10605, 10617, 10642, 10644, 10651, 10699, 107, 1072, 1075, 10765, 10769, 10783, 10808, 10884, 10897, 1…
GO:0022008	neurogenesis	GOBP	1138	-0.0225798	0.869076	5.30452e-09	1.87847e-07	up in HPV(-)	1000, 1009, 10096, 10100, 1021, 10211, 10319, 10371, 10381, 103910, 10398, 10417, 10458, 10487, 10494, 10505, 1051, 10512, 10570, 10579, 107, 1072, 1073, 10810, 10938, 11023, 11075, 11202, 123016, 124590, 1280, 1281, 1282, 1284, 1287, 1289, 1290, 1291, 1292, 133, 1400, 1459, 1460, 1462, 1464, 147040, 147495, 1482, 148738, 150465, 152, 1523, 1608, 1613, 1627, 1687, 170302, 1716, 1745, 1746, 1749, …
GO:0006725	cellular aromatic compound metabolic process	GOBP	5478	0.0129963	1.08412	5.37925e-09	1.8917e-07	up in HPV(+)	10009, 100101467, 100128927, 100129654, 10013, 100131390, 100131827, 10020, 100271715, 100289635, 100289678, 100316904, 10036, 10044, 10051, 10062, 10075, 101, 10112, 10125, 1017, 10181, 10194, 10224, 10235, 10236, 10250, 10266, 1027, 10270, 1028, 10283, 1029, 10309, 10318, 1032, 10336, 10347, 10352, 10380, 10389, 10472, 10475, 10481, 10499, 105, 10521, 10522, 10533, 10535, 10538, 10564, 10592, 1…
GO:0050670	regulation of lymphocyte proliferation	GOBP	154	0.0400566	1.28266	6.11365e-09	2.13514e-07	up in HPV(+)	10148, 1029, 10385, 10673, 10859, 11151, 11314, 115650, 126259, 146206, 1493, 151888, 1725, 1880, 199, 22806, 2302, 23495, 26191, 29126, 3071, 3109, 3113, 3115, 3123, 3127, 3280, 3458, 3559, 3572, 3574, 3593, 3594, 3600, 3620, 3635, 3659, 3683, 4067, 4179, 4332, 4690, 50943, 51237, 51561, 54440, 5777, 58515, 596, 6352, 6363, 6693, 6776, 6850, 7292, 729230, 7293, 7356, 7412, 7535, 7940, 836, 84433…
GO:0009889	regulation of biosynthetic process	GOBP	3343	0.0143103	1.09301	6.62068e-09	2.29638e-07	up in HPV(+)	10009, 100101467, 100128927, 100129654, 10013, 100131390, 100131827, 100289635, 100289678, 100316904, 10036, 10062, 101, 10148, 1017, 10194, 10224, 10266, 1027, 1028, 1029, 10318, 10333, 10336, 10347, 10389, 10472, 10475, 10481, 10499, 10521, 10522, 10538, 10595, 10600, 10614, 10628, 1063, 10636, 10656, 10657, 10745, 10781, 10782, 10847, 10859, 10865, 10915, 10919, 10943, 11040, 1105, 11063, 1107…
GO:0080090	regulation of primary metabolic process	GOBP	4706	0.0131576	1.08521	7.27742e-09	2.507e-07	up in HPV(+)	10009, 100101467, 100128927, 100129654, 10013, 100131390, 100131827, 10018, 100271715, 100289635, 100289678, 100316904, 10036, 10044, 10062, 101, 10125, 10148, 1017, 10181, 10194, 10224, 10235, 10266, 1027, 1028, 1029, 10309, 10318, 1032, 10333, 10336, 10347, 10389, 10406, 10472, 10475, 10481, 10499, 10521, 10522, 10533, 10538, 10550, 10564, 10595, 10600, 10614, 10628, 1063, 10636, 10641, 10656, …
GO:0055001	muscle cell development	GOBP	137	-0.0527146	0.720651	7.41422e-09	2.53686e-07	up in HPV(-)	10290, 10324, 1073, 11155, 133, 144165, 1482, 150572, 1649, 165904, 1827, 183, 1906, 2274, 23363, 246329, 2626, 26287, 27063, 27231, 3399, 3486, 4000, 4205, 4621, 4624, 4628, 463, 4633, 4656, 4776, 5159, 57462, 58, 58529, 64754, 652, 6608, 6722, 6926, 70, 7040, 71, 7139, 7168, 7273, 779, 8048, 8312, 84665, 8557, 858, 859, 91624, 91653, 92737, 9472
GO:0022610	biological adhesion	GOBP	918	-0.0244872	0.858835	7.65372e-09	2.60124e-07	up in HPV(-)	100, 1000, 1001, 1002, 1006, 1009, 10109, 1012, 1013, 1014, 1021, 10272, 10319, 10395, 10398, 1041, 10417, 10418, 10627, 10630, 10631, 10894, 10979, 11117, 11187, 1192, 1277, 1280, 1281, 1288, 1289, 1291, 1292, 1295, 1301, 1305, 1306, 1308, 1311, 131578, 140885, 1462, 1490, 152404, 1613, 165, 176, 1828, 183, 1861, 1896, 1942, 1946, 1947, 1948, 196264, 201163, 2043, 2049, 2050, 22795, 22798, 22801…
GO:0048705	skeletal system morphogenesis	GOBP	190	-0.0466805	0.748188	7.72131e-09	2.60672e-07	up in HPV(-)	116039, 1277, 1280, 1300, 1301, 1305, 1311, 145258, 1490, 1746, 1749, 2201, 2303, 249, 2734, 2778, 3198, 3207, 3215, 3216, 3217, 3218, 3227, 3235, 3236, 3237, 3340, 3636, 4188, 4256, 4313, 4322, 4323, 4325, 4488, 50515, 51450, 5159, 5447, 56603, 5744, 5914, 60529, 60676, 6422, 6423, 64399, 649, 652, 658, 6608, 6664, 6899, 7040, 7046, 7048, 7057, 7067, 7291, 7476, 8312, 860, 871, 9241, 9775
GO:0002443	leukocyte mediated immunity	GOBP	207	0.0366815	1.25604	8.19093e-09	2.74695e-07	up in HPV(+)	10125, 10538, 10859, 11314, 117157, 1191, 127544, 1378, 1380, 1512, 1621, 2206, 2207, 2208, 2209, 2268, 2302, 259197, 27040, 2956, 30009, 3108, 3119, 3120, 3123, 3127, 3458, 355, 3593, 3594, 3635, 3718, 3815, 387836, 3902, 4049, 4067, 4068, 409, 4179, 4292, 4436, 4542, 4843, 50943, 51311, 51561, 5272, 5294, 54440, 55340, 57379, 5777, 57823, 602, 6348, 653361, 6693, 6776, 6814, 6850, 695, 712, 712…
GO:0003007	heart morphogenesis	GOBP	187	-0.0467533	0.747849	9.31477e-09	3.10329e-07	up in HPV(-)	10395, 10413, 10512, 1280, 1289, 129446, 129880, 1301, 1482, 161882, 182, 1942, 2050, 2274, 2280, 2303, 2535, 2626, 26508, 2697, 27063, 28514, 3084, 3091, 3491, 4488, 4624, 4625, 4633, 4634, 4734, 51384, 55036, 55636, 55742, 57142, 57493, 58495, 5914, 5950, 60485, 6423, 650, 652, 6591, 6604, 6608, 6664, 6722, 6899, 6909, 6926, 70, 7054, 7057, 7134, 7135, 7137, 7139, 7168, 7273, 7291, 7472, 7474, …
GO:0002250	adaptive immune response	GOBP	197	0.0370855	1.25919	9.50514e-09	3.12558e-07	up in HPV(+)	10148, 10333, 10538, 10673, 10859, 115650, 1191, 1378, 1380, 1512, 1520, 2207, 2208, 2209, 2302, 23411, 246, 2956, 30009, 3108, 3119, 3120, 3123, 3127, 3458, 3512, 355, 3572, 3593, 3594, 3635, 3659, 3662, 3702, 3718, 4049, 4179, 4292, 4436, 4791, 50943, 51311, 51561, 5294, 54440, 55340, 57379, 5777, 5971, 602, 6097, 6363, 64092, 64218, 6693, 6850, 695, 712, 7124, 713, 714, 718, 7186, 727, 7292, 7…
GO:0048514	blood vessel morphogenesis	GOBP	421	-0.0338578	0.810249	9.4625e-09	3.12558e-07	up in HPV(-)	1000, 10016, 10052, 1012, 10411, 10413, 10553, 113026, 1282, 1284, 1295, 1306, 133, 14, 1464, 147372, 1482, 1490, 182, 183, 1906, 1909, 1942, 1948, 1950, 2028, 2048, 2049, 2050, 2069, 2152, 2303, 2305, 23213, 2335, 23509, 255324, 2624, 2626, 2637, 2697, 27286, 28996, 290, 302, 306, 3091, 3164, 3198, 3209, 347, 3491, 3552, 3569, 3576, 3606, 3678, 3690, 3848, 388, 4017, 4162, 4240, 4313, 4323, 4627…
GO:0034330	cell junction organization	GOBP	213	-0.0444186	0.75878	9.96261e-09	3.25488e-07	up in HPV(-)	1000, 1001, 1002, 10052, 1006, 1009, 1012, 1013, 10395, 10979, 11187, 129446, 1308, 1613, 1828, 1946, 201163, 23114, 2316, 2318, 2335, 23499, 2697, 2706, 29780, 29984, 347, 3655, 3678, 3690, 3728, 3801, 3861, 3909, 3915, 3918, 3982, 3987, 402, 4323, 4641, 4771, 49861, 5339, 54751, 55679, 55742, 5578, 57493, 57502, 5796, 5817, 5829, 5908, 60, 6281, 64065, 6422, 6591, 6615, 6722, 7040, 7057, 7070, …
GO:0032201	telomere maintenance via semi-conservative replication	GOBP	24	0.0596034	1.44833	1.05876e-08	3.43689e-07	up in HPV(+)	10714, 1763, 2237, 23649, 3978, 5111, 5422, 5424, 5426, 5427, 5983, 5984, 5985, 6118
GO:0001503	ossification	GOBP	310	-0.0382255	0.788552	1.09241e-08	3.52353e-07	up in HPV(-)	1009, 1021, 10272, 1051, 10514, 116039, 117581, 1192, 1213, 1277, 1280, 1291, 1300, 1305, 1462, 1490, 1513, 1594, 1749, 182, 196527, 207, 2079, 2131, 2132, 2201, 2274, 22800, 22801, 22856, 2303, 23051, 23560, 249, 25819, 25937, 2697, 27044, 2719, 2735, 2736, 2778, 3091, 3381, 3399, 3481, 3486, 3488, 3491, 353500, 3569, 3570, 3636, 374, 4256, 4313, 4322, 4323, 4325, 4330, 4488, 4656, 4745, 4882, 5…
GO:0007155	cell adhesion	GOBP	914	-0.0242118	0.860306	1.21202e-08	3.87337e-07	up in HPV(-)	100, 1000, 1001, 1002, 1006, 1009, 10109, 1012, 1013, 1014, 1021, 10272, 10319, 10395, 10398, 1041, 10417, 10418, 10627, 10630, 10631, 10894, 10979, 11117, 11187, 1192, 1277, 1280, 1281, 1288, 1289, 1291, 1292, 1295, 1301, 1305, 1306, 1308, 1311, 140885, 1462, 1490, 152404, 1613, 165, 176, 1828, 183, 1861, 1896, 1942, 1946, 1947, 1948, 196264, 201163, 2043, 2049, 2050, 22795, 22798, 22801, 2303, …
GO:0051179	localization	GOBP	4241	-0.0134743	0.919672	1.21616e-08	3.87337e-07	up in HPV(-)	100, 1000, 1001, 10016, 10043, 100506013, 10052, 10058, 10059, 10060, 10061, 10082, 10089, 10096, 10105, 10109, 1012, 10121, 10128, 10130, 10133, 10134, 10165, 10175, 10188, 10204, 1021, 10211, 10226, 10227, 10237, 10244, 10344, 10345, 10371, 10395, 10411, 10440, 10452, 10458, 10476, 10484, 10487, 10490, 10494, 10512, 10514, 10527, 1053, 10540, 10553, 10579, 10597, 10627, 10630, 10632, 10642, 106…
GO:0042693	muscle cell fate commitment	GOBP	13	-0.10797	0.511202	1.23086e-08	3.89568e-07	up in HPV(-)	1482, 22943, 4618, 4633, 4656, 6608, 6899, 6909, 6926, 90
GO:0045619	regulation of lymphocyte differentiation	GOBP	108	0.0431821	1.30782	1.36475e-08	4.2926e-07	up in HPV(+)	101, 1029, 146206, 1493, 150372, 22806, 2302, 2323, 3071, 3108, 3111, 3398, 355, 3559, 3574, 3593, 3594, 3600, 3635, 3659, 3662, 3718, 4179, 4602, 50943, 51561, 54440, 55340, 5777, 6097, 6363, 6776, 6850, 695, 7292, 7535, 814, 84433, 8456, 84807, 8546, 8876, 914, 9308, 939, 942, 9580, 972
GO:0034654	nucleobase-containing compound biosynthetic process	GOBP	3324	0.0140193	1.09103	1.3866e-08	4.30783e-07	up in HPV(+)	10009, 100101467, 100128927, 100129654, 10013, 100131390, 100131827, 100289635, 100289678, 100316904, 10036, 10062, 101, 1017, 10194, 10224, 10250, 10266, 1027, 1028, 1029, 10318, 1032, 10336, 10389, 10472, 10475, 10481, 10499, 10521, 10522, 10533, 10538, 10595, 10600, 10614, 10628, 1063, 10636, 10656, 10657, 10714, 10745, 10781, 10782, 10847, 10859, 10861, 10865, 10915, 10919, 10943, 11040, 1105…
GO:0048589	developmental growth	GOBP	257	-0.0409496	0.775315	1.3782e-08	4.30783e-07	up in HPV(-)	10371, 10505, 1144, 1311, 133, 1482, 150465, 183, 1848, 2016, 203447, 2069, 2258, 23242, 2335, 2596, 2626, 2697, 2736, 2778, 2934, 3084, 3207, 3237, 347, 3488, 351, 374, 3913, 3984, 4131, 4137, 4488, 4618, 4624, 4692, 4803, 5048, 50515, 5081, 51083, 51119, 51330, 5447, 55083, 5523, 55558, 5653, 57142, 57167, 5744, 5754, 57611, 5914, 5950, 60485, 6299, 6422, 6423, 652, 658, 6608, 6665, 6722, 6909,…
GO:0001649	osteoblast differentiation	GOBP	176	-0.0472738	0.745434	1.51798e-08	4.68722e-07	up in HPV(-)	1021, 1051, 10514, 117581, 1192, 1213, 1277, 1291, 1462, 1749, 182, 207, 2079, 2201, 2274, 22800, 22801, 23051, 23560, 249, 25819, 25937, 2697, 27044, 2735, 2736, 2778, 3381, 3399, 3481, 3486, 3488, 3491, 3569, 3570, 374, 4488, 4745, 537, 56975, 5701, 5744, 5745, 6238, 64093, 6422, 6423, 650, 652, 658, 6591, 6608, 6615, 6664, 7291, 7473, 7477, 7481, 8519, 860, 8646, 90, 9188, 9241, 9260
GO:0042129	regulation of T cell proliferation	GOBP	115	0.0422782	1.30049	1.79325e-08	5.50363e-07	up in HPV(+)	10148, 1029, 10385, 10673, 10859, 11151, 115650, 126259, 146206, 1493, 151888, 1725, 199, 2302, 29126, 3071, 3109, 3113, 3115, 3123, 3127, 3280, 3458, 3559, 3572, 3593, 3594, 3600, 3620, 3659, 3683, 4179, 4690, 50943, 51561, 54440, 5777, 58515, 6352, 6363, 6693, 6776, 6850, 7292, 729230, 7356, 7412, 7535, 836, 84433, 8764, 916, 940, 942
GO:0042102	positive regulation of T cell proliferation	GOBP	76	0.0466873	1.33662	1.82031e-08	5.55304e-07	up in HPV(+)	10148, 10673, 11151, 115650, 126259, 146206, 1725, 199, 29126, 3071, 3109, 3113, 3115, 3280, 3458, 3559, 3572, 3593, 3594, 3600, 3683, 4179, 4690, 50943, 51561, 54440, 58515, 6352, 6363, 6693, 6776, 6850, 7292, 729230, 7412, 7535, 84433, 916, 940, 942
GO:0070663	regulation of leukocyte proliferation	GOBP	159	0.0388061	1.27273	1.85284e-08	5.61844e-07	up in HPV(+)	10148, 1029, 10385, 10673, 10859, 11151, 11314, 115650, 126259, 1435, 146206, 1493, 151888, 1725, 1880, 199, 22806, 2302, 23495, 26191, 29126, 3071, 3109, 3113, 3115, 3123, 3127, 3280, 3458, 3559, 3572, 3574, 3593, 3594, 3600, 3620, 3635, 3659, 3683, 4067, 4179, 4254, 4332, 4690, 50943, 51237, 51561, 54440, 5777, 58515, 596, 6352, 6363, 6693, 6776, 6850, 7292, 729230, 7293, 7356, 7412, 7535, 7940…
GO:0060415	muscle tissue morphogenesis	GOBP	55	-0.0702851	0.646104	1.87665e-08	5.65675e-07	up in HPV(-)	129446, 1301, 1482, 161882, 2280, 2303, 27063, 3084, 4618, 4624, 4625, 4633, 4634, 4638, 5081, 650, 6899, 70, 7134, 7135, 7137, 7139, 7168, 7273, 7472, 7474, 8557
GO:0060485	mesenchyme development	GOBP	171	-0.0474524	0.744607	2.02374e-08	6.06403e-07	up in HPV(-)	10371, 10413, 10512, 1072, 10787, 11171, 1277, 145258, 147906, 1482, 182, 1906, 1909, 1942, 1947, 2295, 2303, 2316, 25805, 25937, 2626, 2637, 26508, 2668, 283149, 3084, 3091, 3170, 359845, 4017, 4488, 4609, 4734, 5077, 51384, 5159, 54949, 57142, 5754, 58495, 6422, 6423, 650, 652, 6591, 6608, 6615, 6664, 6899, 6909, 7040, 7041, 7046, 7057, 7080, 7291, 7472, 7474, 7477, 7481, 80326, 8091, 8828, 882…
GO:0050673	epithelial cell proliferation	GOBP	264	-0.0401014	0.779413	2.04482e-08	6.09116e-07	up in HPV(-)	1001, 10016, 1012, 1021, 10344, 10413, 10468, 1051, 11171, 11202, 11331, 116039, 1295, 1515, 1749, 1909, 1948, 2069, 207, 2118, 2152, 2191, 23213, 255324, 2719, 2810, 3091, 3164, 3265, 3569, 3690, 374, 383, 3912, 3915, 3987, 4017, 4163, 4323, 4609, 4830, 4831, 51162, 51384, 5155, 5268, 5365, 5467, 55612, 55679, 5578, 57521, 5796, 58189, 58495, 595, 599, 60485, 6331, 64127, 6422, 6423, 646, 650, 6…
GO:0034329	cell junction assembly	GOBP	188	-0.0457234	0.752651	2.12951e-08	6.30633e-07	up in HPV(-)	1000, 1001, 1002, 10052, 1006, 1009, 1012, 1013, 10395, 10979, 11187, 1308, 1613, 1828, 1946, 201163, 23114, 2316, 2318, 2335, 23499, 2697, 2706, 29780, 29984, 347, 3655, 3678, 3690, 3728, 3861, 3909, 3915, 3918, 3982, 3987, 402, 4323, 4641, 49861, 5339, 54751, 55679, 55742, 5578, 57493, 5796, 5817, 5829, 5908, 60, 6281, 6422, 6591, 6615, 6722, 7057, 7070, 71, 7205, 7414, 7481, 83660, 87, 88, 908…
GO:0044786	cell cycle DNA replication	GOBP	43	0.0526178	1.3868	2.16889e-08	6.38562e-07	up in HPV(+)	10714, 144455, 1763, 2237, 23649, 3978, 5111, 5422, 5424, 5426, 5427, 5983, 5984, 5985, 6118, 7884, 79733, 81620, 8243, 9126, 91603
GO:0006297	nucleotide-excision repair, DNA gap filling	GOBP	19	0.0614598	1.46514	2.25106e-08	6.58924e-07	up in HPV(+)	10714, 340533, 3978, 5111, 51426, 5424, 5426, 5427, 5983, 5984, 5985, 6118
GO:0030029	actin filament-based process	GOBP	499	-0.0307202	0.826204	2.43278e-08	7.08023e-07	up in HPV(-)	10095, 10096, 10109, 10324, 10344, 10391, 10395, 10411, 10435, 10458, 10487, 1072, 1073, 10787, 10810, 11133, 11155, 112464, 114793, 119, 121512, 122786, 1264, 129446, 1398, 1482, 1490, 1515, 1613, 1627, 165904, 1674, 1809, 1906, 1946, 2150, 2275, 22885, 22998, 23002, 2316, 23189, 23242, 23363, 23433, 23603, 23647, 2626, 26499, 27, 27063, 29108, 29109, 2934, 29780, 29984, 30846, 3265, 359845, 363…
GO:0001775	cell activation	GOBP	769	0.0230678	1.15414	2.64885e-08	7.66502e-07	up in HPV(+)	10062, 10077, 101, 10125, 10148, 10235, 1029, 10333, 10385, 10461, 10537, 10538, 10673, 10859, 11151, 11314, 1139, 115650, 117157, 1191, 120425, 1236, 126259, 1268, 1269, 1326, 1380, 1435, 146206, 146850, 1493, 150372, 151, 151888, 1524, 159296, 1607, 1609, 168667, 170575, 1725, 1794, 1880, 197358, 199, 200081, 201633, 202309, 2039, 2185, 2206, 2207, 2268, 22806, 22904, 2302, 23228, 2323, 23303, …
GO:0044767	single-organism developmental process	GOBP	4252	-0.0131048	0.921787	2.86288e-08	8.23728e-07	up in HPV(-)	100, 1000, 1001, 10016, 100506013, 10052, 10058, 10059, 1009, 10096, 10100, 10109, 1012, 1013, 10202, 1021, 10211, 10234, 10252, 10272, 10290, 10319, 10324, 10345, 10371, 10381, 103910, 10395, 10398, 1041, 10411, 10413, 10417, 10435, 10447, 10458, 10468, 10487, 10494, 10501, 10505, 1051, 10512, 10514, 1053, 10553, 10555, 10570, 10579, 10587, 10602, 10627, 10630, 10631, 10634, 10655, 1066, 107, 10…
GO:0009913	epidermal cell differentiation	GOBP	144	-0.0501386	0.73228	2.8889e-08	8.2652e-07	up in HPV(-)	1001, 1041, 10413, 1523, 1594, 163778, 182, 2069, 2312, 23581, 23764, 25833, 26154, 26524, 2735, 2736, 2810, 28514, 353139, 353140, 353142, 353145, 3858, 3872, 4097, 4488, 4831, 50604, 51083, 51384, 5453, 56603, 58495, 60485, 6278, 6424, 652, 6701, 6704, 6706, 7022, 7053, 7062, 7251, 7421, 7474, 84189, 84648
GO:0048644	muscle organ morphogenesis	GOBP	60	-0.0676738	0.656675	3.03368e-08	8.63064e-07	up in HPV(-)	129446, 1301, 145258, 1482, 161882, 2280, 2303, 27063, 27230, 3084, 3976, 4618, 4624, 4625, 4633, 4634, 4638, 5081, 650, 6899, 70, 7134, 7135, 7137, 7139, 7168, 7273, 7472, 7474, 8557
GO:0051270	regulation of cellular component movement	GOBP	547	-0.0292679	0.833694	3.36652e-08	9.47116e-07	up in HPV(-)	100, 10016, 10052, 1012, 1021, 10344, 10371, 10395, 10630, 11009, 11171, 1277, 1281, 131578, 14, 1460, 147372, 1613, 1809, 182, 183, 1839, 1906, 1909, 1942, 201163, 207, 2149, 2150, 2152, 22800, 2303, 23189, 23213, 23499, 23560, 23630, 23768, 26012, 2621, 2626, 2697, 27, 27286, 2768, 284114, 29108, 29984, 3036, 306, 3091, 3265, 3309, 338879, 347, 3486, 3488, 3491, 3569, 3570, 3576, 3667, 3678, 36…
GO:1901360	organic cyclic compound metabolic process	GOBP	5629	0.0122478	1.07909	3.35905e-08	9.47116e-07	up in HPV(+)	10009, 100101467, 100128927, 100129654, 10013, 100131390, 100131827, 10020, 100271715, 100289635, 100289678, 100316904, 10036, 10044, 10051, 10062, 10075, 101, 10112, 10125, 1017, 10181, 10194, 10224, 10235, 10236, 10243, 10250, 10266, 1027, 10270, 1028, 10283, 1029, 10309, 10318, 1032, 10336, 10347, 10352, 10380, 10389, 10472, 10475, 10481, 10499, 105, 10521, 10522, 10533, 10535, 10538, 1056, 10…
GO:0018130	heterocycle biosynthetic process	GOBP	3381	0.0135498	1.08785	3.51012e-08	9.82058e-07	up in HPV(+)	10009, 100101467, 100128927, 100129654, 10013, 100131390, 100131827, 100289635, 100289678, 100316904, 10036, 10062, 101, 1017, 10194, 10224, 10243, 10250, 10266, 1027, 1028, 1029, 10318, 1032, 10336, 10389, 10472, 10475, 10481, 10499, 10521, 10522, 10533, 10538, 10595, 10600, 10614, 10628, 1063, 10636, 10656, 10657, 10714, 10745, 10781, 10782, 10847, 10859, 10861, 10865, 10915, 10919, 10943, 1104…
GO:0071363	cellular response to growth factor stimulus	GOBP	595	-0.0281878	0.839309	3.56688e-08	9.92454e-07	up in HPV(-)	10016, 107, 10938, 10979, 11075, 11171, 11173, 113, 121512, 1277, 1278, 1280, 1281, 1284, 135228, 1398, 147372, 1490, 1749, 183, 1839, 1845, 1848, 1874, 1950, 2010, 201163, 2069, 207, 2200, 2201, 2250, 2280, 22938, 2308, 23089, 23213, 23365, 23625, 25791, 25805, 25937, 2621, 26508, 26509, 26574, 27018, 27063, 27161, 2734, 27429, 2817, 283149, 28996, 3036, 3084, 30844, 3091, 3164, 3265, 3309, 3340…
GO:0050864	regulation of B cell activation	GOBP	85	0.0448779	1.32167	3.63601e-08	1.00616e-06	up in HPV(+)	1029, 10673, 11314, 115650, 1493, 150372, 151888, 1880, 22806, 2302, 23495, 30009, 3071, 3398, 3458, 355, 3574, 3635, 4067, 4332, 50943, 51237, 54440, 5777, 596, 64092, 6776, 6850, 695, 7292, 7293, 836, 84174, 84433, 8741, 939, 940, 9466, 972
GO:0001763	morphogenesis of a branching structure	GOBP	190	-0.0448729	0.75664	3.779e-08	1.04005e-06	up in HPV(-)	10371, 10512, 11331, 1282, 1305, 133, 170690, 1746, 183, 1906, 1909, 1950, 2118, 2119, 2303, 23213, 2637, 2668, 2719, 2736, 3170, 3207, 3209, 3217, 3237, 3265, 3569, 374, 3845, 4233, 4323, 4488, 4609, 4776, 5058, 5154, 5155, 5499, 57142, 578, 5829, 6299, 6422, 6423, 64399, 650, 652, 6591, 6608, 6722, 6926, 7022, 7040, 7048, 7052, 7080, 7421, 7472, 7474, 7475, 7477, 859, 8829, 90, 9021, 9241, 960
GO:0061041	regulation of wound healing	GOBP	87	-0.0594556	0.691085	4.05304e-08	1.10944e-06	up in HPV(-)	10630, 135228, 1839, 1906, 196527, 2149, 2150, 2152, 2191, 2303, 23189, 286133, 302, 3170, 3265, 3848, 4638, 5054, 51330, 5154, 5155, 5270, 5328, 5578, 5592, 5624, 6665, 7048, 7057, 710, 84959, 857, 948
GO:0070665	positive regulation of leukocyte proliferation	GOBP	105	0.0425254	1.30249	4.092e-08	1.11408e-06	up in HPV(+)	10148, 10673, 11151, 115650, 126259, 1435, 146206, 1725, 1880, 199, 29126, 3071, 3109, 3113, 3115, 3280, 3458, 3559, 3572, 3574, 3593, 3594, 3600, 3683, 4067, 4179, 4254, 4690, 50943, 51561, 54440, 58515, 596, 6352, 6363, 6693, 6776, 6850, 7292, 729230, 7293, 7412, 7535, 84433, 916, 940, 942, 972
GO:0042060	wound healing	GOBP	570	-0.0285394	0.837477	4.34456e-08	1.17652e-06	up in HPV(-)	1001, 10398, 10411, 10487, 10544, 10627, 10630, 1072, 10938, 11009, 11069, 1192, 1277, 1278, 1281, 1289, 135228, 1398, 140885, 152, 1608, 160851, 161882, 1839, 1861, 1906, 1950, 196527, 2069, 207, 2149, 2150, 2151, 2152, 22927, 2303, 2316, 23186, 23189, 2335, 23428, 23499, 23657, 23764, 25833, 2596, 26153, 2621, 2624, 2626, 26509, 2697, 2734, 2768, 2770, 2778, 286133, 2888, 2934, 2977, 30008, 302…
GO:0042476	odontogenesis	GOBP	104	-0.0557784	0.707059	4.41862e-08	1.19021e-06	up in HPV(-)	10468, 10913, 116039, 1277, 1278, 133, 1745, 1746, 1747, 1896, 1906, 1909, 249, 25928, 2736, 3399, 3624, 3655, 3912, 401138, 4488, 4771, 5066, 54829, 56975, 58524, 6331, 64065, 650, 652, 6608, 6899, 7040, 7286, 7291, 7475, 7477, 80326, 860, 9313, 9622
GO:0045580	regulation of T cell differentiation	GOBP	84	0.0448039	1.32107	4.53707e-08	1.21565e-06	up in HPV(+)	101, 1029, 146206, 1493, 2302, 3071, 3108, 3111, 3559, 3574, 3593, 3594, 3600, 3659, 3662, 3718, 4179, 4602, 50943, 51561, 54440, 55340, 6097, 6363, 6776, 6850, 7292, 7535, 814, 84433, 8456, 84807, 8546, 8876, 914, 9308, 942, 9580, 972
GO:0040007	growth	GOBP	737	-0.0254989	0.853453	4.68668e-08	1.24912e-06	up in HPV(-)	10071, 1012, 10371, 10413, 10477, 10505, 10634, 11007, 1144, 123016, 1311, 133, 1410, 147040, 147906, 1482, 1490, 150465, 151242, 152404, 1594, 170302, 1717, 1735, 183, 1839, 1848, 185, 1906, 201163, 2016, 2019, 203447, 2069, 207, 2137, 2182, 2258, 2273, 2303, 2305, 23242, 23286, 2335, 23532, 23677, 259230, 2596, 26153, 2621, 2626, 26524, 2697, 27000, 2719, 27230, 2736, 27429, 2778, 2786, 2810, 2…
GO:0031424	keratinization	GOBP	39	-0.0766525	0.621037	4.77242e-08	1.26532e-06	up in HPV(-)	1001, 163778, 23581, 26154, 2810, 353139, 353140, 353142, 353145, 3872, 56603, 6701, 6704, 6706, 7053, 7062, 84648
GO:0030216	keratinocyte differentiation	GOBP	101	-0.0562399	0.705034	4.80407e-08	1.26707e-06	up in HPV(-)	1001, 1041, 10413, 1594, 163778, 182, 2069, 2312, 23581, 25833, 26154, 26524, 2810, 353139, 353140, 353142, 353145, 3858, 3872, 4488, 4831, 50604, 51384, 5453, 56603, 58495, 60485, 6278, 6701, 6704, 6706, 7022, 7053, 7062, 7251, 7421, 7474, 84648
GO:0009790	embryo development	GOBP	865	-0.0237744	0.862648	4.83706e-08	1.26916e-06	up in HPV(-)	100, 100506013, 10290, 10395, 10413, 1051, 10512, 10630, 10655, 1072, 10787, 10804, 10959, 113026, 116039, 124590, 1277, 1280, 1284, 1289, 1290, 1291, 1295, 129880, 1301, 133, 1437, 144165, 145258, 1482, 153572, 161882, 1738, 1745, 1746, 1749, 1789, 1845, 1848, 1906, 1909, 1942, 1947, 201163, 2016, 2019, 203447, 2048, 207, 2070, 2131, 2132, 2182, 2201, 221833, 22943, 2295, 2303, 23135, 23213, 232…
GO:0002520	immune system development	GOBP	653	0.0240625	1.1613	4.8745e-08	1.27239e-06	up in HPV(+)	10018, 101, 1028, 1029, 10425, 10461, 10537, 10538, 10859, 11006, 122618, 1230, 1233, 1236, 133522, 1380, 139716, 140685, 142, 1435, 1436, 146206, 147808, 1493, 150372, 157570, 159296, 164668, 167153, 170575, 1777, 1794, 1880, 2039, 204851, 2122, 2185, 219790, 2235, 22806, 22904, 2302, 2313, 23218, 23228, 2323, 23335, 23495, 23598, 23648, 2529, 257101, 26013, 26191, 27033, 2872, 28959, 2956, 2976…
GO:0019438	aromatic compound biosynthetic process	GOBP	3380	0.0133908	1.08678	5.04821e-08	1.31098e-06	up in HPV(+)	10009, 100101467, 100128927, 100129654, 10013, 100131390, 100131827, 100289635, 100289678, 100316904, 10036, 10062, 101, 1017, 10194, 10224, 10250, 10266, 1027, 1028, 1029, 10318, 1032, 10336, 10389, 10472, 10475, 10481, 10499, 10521, 10522, 10533, 10538, 10595, 10600, 10614, 10628, 1063, 10636, 10656, 10657, 10714, 10745, 10781, 10782, 10847, 10859, 10861, 10865, 10915, 10919, 10943, 11040, 1105…
GO:0022603	regulation of anatomical structure morphogenesis	GOBP	648	-0.0268772	0.846173	5.11457e-08	1.32144e-06	up in HPV(-)	10016, 10059, 10096, 10109, 10371, 103910, 10395, 10411, 10435, 10458, 10493, 10494, 10505, 10553, 10602, 10627, 10630, 10655, 1072, 1073, 10810, 10938, 10979, 11171, 11331, 114299, 114793, 116039, 118987, 121512, 1277, 1284, 1289, 1290, 133, 1471, 147372, 147906, 150465, 1523, 152503, 1723, 183, 1848, 1906, 1909, 1942, 2043, 2048, 2049, 2118, 2119, 2152, 2258, 22943, 2303, 23189, 23213, 23237, 2…
GO:0042221	response to chemical	GOBP	2761	-0.0147299	0.912525	5.26841e-08	1.35428e-06	up in HPV(-)	100, 1001, 10016, 10096, 10105, 1012, 10130, 10165, 10202, 10227, 10272, 10344, 10345, 10371, 10381, 103910, 10398, 10410, 10411, 10417, 10458, 10487, 10505, 1051, 10512, 10525, 1053, 10555, 10570, 10587, 10634, 1066, 107, 1072, 1075, 10808, 10897, 10938, 10954, 10972, 10979, 10999, 11009, 11015, 11023, 11031, 11044, 11075, 11171, 11173, 112616, 113, 116988, 119391, 121512, 123016, 123920, 1244, …
GO:0000902	cell morphogenesis	GOBP	989	-0.0223611	0.870258	5.40895e-08	1.38338e-06	up in HPV(-)	1009, 10096, 10109, 10211, 10319, 10371, 10381, 103910, 10395, 10398, 10417, 10435, 10458, 10487, 10494, 10505, 10512, 10570, 10602, 10627, 10630, 107, 1072, 1073, 10810, 10979, 11023, 11171, 11202, 114299, 114793, 118987, 121512, 122786, 123016, 1277, 1280, 1281, 1282, 1284, 1287, 1289, 1290, 1291, 1292, 129880, 1400, 145258, 1459, 1460, 147906, 148738, 150465, 1523, 152503, 161882, 170302, 1749…
GO:0007492	endoderm development	GOBP	68	-0.0641127	0.67137	5.52433e-08	1.40579e-06	up in HPV(-)	100506013, 10787, 1284, 1289, 1290, 1291, 1295, 1301, 1848, 2131, 22943, 23237, 2335, 2626, 3227, 3624, 3678, 3693, 3909, 3912, 3915, 4313, 4323, 55614, 5744, 7040, 7080, 8091, 9241
GO:0046632	alpha-beta T cell differentiation	GOBP	68	0.0468611	1.33806	5.57056e-08	1.41047e-06	up in HPV(+)	10538, 159296, 2529, 3071, 3458, 3593, 3594, 3659, 3662, 3702, 3718, 4602, 5075, 50943, 51561, 54440, 55340, 5734, 596, 5971, 602, 6097, 6304, 6363, 64218, 6850, 6932, 7292, 7294, 7535, 8320, 8546, 9308, 942, 944
GO:0070848	response to growth factor	GOBP	608	-0.0275386	0.842702	5.65301e-08	1.42422e-06	up in HPV(-)	10016, 107, 10938, 10979, 11075, 11171, 11173, 113, 121512, 1277, 1278, 1280, 1281, 1284, 135228, 1398, 147372, 1490, 1749, 183, 1839, 1845, 1848, 1874, 1950, 2010, 201163, 2069, 207, 2200, 2201, 2250, 2280, 22938, 2308, 23089, 23213, 23365, 23625, 25791, 25805, 25937, 2621, 26508, 26509, 26574, 27018, 27063, 27161, 2734, 27429, 2817, 283149, 28996, 3036, 3084, 30844, 3091, 3164, 3265, 3309, 3340…
GO:0031323	regulation of cellular metabolic process	GOBP	4693	0.0123255	1.07961	5.79978e-08	1.45397e-06	up in HPV(+)	10009, 100101467, 100128927, 100129654, 10013, 100131390, 100131827, 100271715, 100289635, 100289678, 100316904, 10036, 10044, 10062, 101, 10125, 10148, 1017, 10181, 10194, 10224, 10235, 10266, 1027, 1028, 1029, 10309, 10318, 1032, 10333, 10336, 10347, 10385, 10389, 10472, 10475, 10481, 10499, 10521, 10522, 10533, 10538, 10550, 10564, 10595, 10600, 10614, 10628, 1063, 10636, 10641, 10656, 10657, …
GO:0055003	cardiac myofibril assembly	GOBP	15	-0.100511	0.535456	6.03311e-08	1.50501e-06	up in HPV(-)	1482, 23363, 4205, 4628, 4633, 5159, 6722, 70, 7273, 8048, 8557
GO:0055013	cardiac muscle cell development	GOBP	48	-0.0712238	0.642346	7.40133e-08	1.83727e-06	up in HPV(-)	10290, 1482, 165904, 183, 2274, 23363, 2626, 4000, 4205, 4624, 4628, 4633, 5159, 652, 6722, 6926, 70, 7273, 8048, 8557, 859, 91624, 9472
GO:0050852	T cell receptor signaling pathway	GOBP	105	0.0419868	1.29814	7.44349e-08	1.83872e-06	up in HPV(+)	11314, 1236, 146206, 26191, 27040, 3113, 3115, 3117, 3118, 3119, 3120, 3122, 3123, 3127, 3551, 3635, 3702, 387357, 3937, 4690, 4790, 4792, 50852, 50943, 5142, 5291, 53347, 54923, 5777, 5795, 7294, 7454, 7535, 785, 84433, 915, 916, 920, 940, 9402
GO:0044271	cellular nitrogen compound biosynthetic process	GOBP	3436	0.0131434	1.08511	7.66817e-08	1.88503e-06	up in HPV(+)	10009, 100101467, 100128927, 100129654, 10013, 100131390, 100131827, 100289635, 100289678, 100316904, 10036, 10062, 101, 1017, 10194, 10224, 10250, 10266, 1027, 1028, 1029, 10318, 1032, 10336, 10389, 10472, 10475, 10481, 10499, 10521, 10522, 10533, 10538, 10595, 10600, 10614, 10628, 1063, 10636, 10656, 10657, 10714, 10745, 10781, 10782, 10847, 10859, 10861, 10865, 10915, 10919, 10943, 11040, 1105…
GO:0032946	positive regulation of mononuclear cell proliferation	GOBP	103	0.0420824	1.29891	8.37624e-08	2.04914e-06	up in HPV(+)	10148, 10673, 11151, 115650, 126259, 1435, 146206, 1725, 1880, 199, 29126, 3071, 3109, 3113, 3115, 3280, 3458, 3559, 3572, 3574, 3593, 3594, 3600, 3683, 4179, 4690, 50943, 51561, 54440, 58515, 596, 6352, 6363, 6693, 6776, 6850, 7292, 729230, 7293, 7412, 7535, 84433, 916, 940, 942, 972
GO:0002521	leukocyte differentiation	GOBP	366	0.0289915	1.19742	8.74446e-08	2.12894e-06	up in HPV(+)	101, 1029, 10461, 10537, 10538, 10859, 11006, 1230, 1236, 133522, 1380, 139716, 140685, 142, 1435, 1436, 146206, 1493, 150372, 159296, 170575, 1794, 1880, 2185, 22806, 22904, 2302, 23228, 2323, 23598, 2529, 257101, 26191, 28959, 29760, 30009, 3059, 3071, 3087, 3108, 3111, 3120, 324, 3398, 3428, 3458, 355, 3559, 3574, 3593, 3594, 3600, 3635, 3659, 3662, 3676, 3684, 3702, 3718, 3815, 387357, 3964, …
GO:0032990	cell part morphogenesis	GOBP	715	-0.025306	0.854476	8.98256e-08	2.17645e-06	up in HPV(-)	10059, 1009, 10096, 10211, 10371, 10381, 103910, 10398, 10417, 10458, 10487, 10494, 10505, 10512, 10570, 107, 1072, 1073, 11023, 11202, 123016, 1280, 1281, 1282, 1284, 1287, 1289, 1290, 1291, 1292, 129880, 1400, 1459, 1460, 148738, 150465, 1523, 170302, 1749, 1809, 1874, 1942, 1944, 1946, 1947, 1948, 1949, 199221, 2016, 2043, 2048, 2049, 2118, 2131, 2258, 22873, 22885, 22897, 23114, 2316, 23189, …
GO:0030097	hemopoiesis	GOBP	588	0.0245143	1.16456	9.45138e-08	2.27913e-06	up in HPV(+)	101, 1028, 1029, 10425, 10461, 10537, 10538, 10859, 11006, 122618, 1230, 1236, 133522, 1380, 139716, 140685, 142, 1435, 1436, 146206, 147808, 1493, 150372, 157570, 159296, 164668, 167153, 170575, 1777, 1794, 1880, 2039, 204851, 2122, 2185, 219790, 2235, 22806, 22904, 2302, 2313, 23218, 23228, 2323, 23335, 23495, 23598, 23648, 2529, 257101, 26013, 26191, 27033, 2872, 28959, 29760, 29843, 30009, 30…
GO:0007399	nervous system development	GOBP	1652	-0.0176484	0.896123	9.58813e-08	2.2903e-06	up in HPV(-)	1000, 10058, 1009, 10096, 10100, 1021, 10211, 10319, 10371, 10381, 103910, 10395, 10398, 10417, 10458, 10487, 10494, 10501, 10505, 1051, 10512, 10570, 10579, 10630, 107, 1072, 1073, 10787, 10810, 10938, 10971, 11023, 11075, 11202, 11281, 1131, 1152, 123016, 124590, 1280, 1281, 1282, 1284, 1287, 1289, 1290, 1291, 1292, 133, 1400, 144165, 145258, 1459, 1460, 1462, 1464, 147040, 1471, 147495, 1482, …
GO:0042100	B cell proliferation	GOBP	59	0.0478592	1.34639	9.56965e-08	2.2903e-06	up in HPV(+)	1029, 10673, 11314, 115650, 1380, 1493, 151888, 1880, 22806, 23228, 23495, 3071, 3574, 3635, 4064, 4067, 4332, 51237, 54440, 596, 7293, 836, 84433, 931, 959, 972, 973
GO:0050853	B cell receptor signaling pathway	GOBP	38	0.0524683	1.38551	1.01848e-07	2.42139e-06	up in HPV(+)	11314, 1493, 150372, 23228, 257144, 26191, 3071, 4067, 4332, 54923, 5579, 5777, 596, 640, 6850, 695, 7462, 83416, 930, 973, 974
GO:0050671	positive regulation of lymphocyte proliferation	GOBP	102	0.0420008	1.29825	1.02371e-07	2.42247e-06	up in HPV(+)	10148, 10673, 11151, 115650, 126259, 146206, 1725, 1880, 199, 29126, 3071, 3109, 3113, 3115, 3280, 3458, 3559, 3572, 3574, 3593, 3594, 3600, 3683, 4179, 4690, 50943, 51561, 54440, 58515, 596, 6352, 6363, 6693, 6776, 6850, 7292, 729230, 7293, 7412, 7535, 84433, 916, 940, 942, 972
GO:0002764	immune response-regulating signaling pathway	GOBP	427	0.0273264	1.18509	1.10767e-07	2.60895e-06	up in HPV(+)	10062, 101, 10125, 10163, 1027, 10318, 10333, 10859, 11314, 118788, 1236, 1378, 1380, 146206, 1493, 150372, 1512, 151888, 1520, 152831, 192670, 2065, 2206, 2207, 2209, 2210, 2219, 2247, 2261, 2268, 23098, 23228, 23239, 2475, 257144, 257397, 26191, 26523, 26999, 27040, 2822, 2867, 3055, 3071, 3113, 3115, 3117, 3118, 3119, 3120, 3122, 3123, 3127, 353376, 3551, 3635, 3656, 3659, 3662, 3684, 3689, 37…
GO:0019724	B cell mediated immunity	GOBP	89	0.0432522	1.30839	1.25436e-07	2.94077e-06	up in HPV(+)	10538, 1191, 1378, 1380, 2207, 2208, 2209, 2302, 2956, 30009, 3108, 3119, 3120, 3123, 3127, 3458, 355, 3635, 4049, 4179, 4292, 4436, 50943, 51311, 55340, 57379, 5777, 602, 695, 712, 7124, 713, 714, 718, 727, 7292, 730, 733, 84174, 8741, 9156, 939, 940, 9466, 959, 972
GO:0060350	endochondral bone morphogenesis	GOBP	48	-0.070264	0.646189	1.34222e-07	3.13225e-06	up in HPV(-)	1277, 1280, 1300, 1305, 1311, 1749, 249, 2778, 3207, 3237, 3636, 4322, 4323, 4325, 4488, 5447, 5744, 5914, 652, 7057, 860, 871
GO:0061138	morphogenesis of a branching epithelium	GOBP	182	-0.0440401	0.760566	1.37282e-07	3.18897e-06	up in HPV(-)	10371, 10512, 11331, 1282, 133, 170690, 183, 1906, 1909, 1950, 2118, 2119, 2303, 23213, 2637, 2668, 2719, 2736, 3170, 3207, 3209, 3217, 3237, 3265, 3569, 374, 3845, 4233, 4323, 4488, 4609, 4776, 5058, 5154, 5155, 5499, 578, 5829, 6299, 6422, 6423, 64399, 650, 652, 6591, 6608, 6722, 6926, 7022, 7040, 7048, 7052, 7080, 7421, 7472, 7474, 7475, 7477, 859, 8829, 90, 9021, 9241, 960
GO:0045058	T cell selection	GOBP	35	0.0529677	1.38982	1.48905e-07	3.44317e-06	up in HPV(+)	10538, 1236, 1794, 3108, 355, 3593, 3594, 3600, 3662, 387357, 51561, 596, 6693, 6850, 7535, 84433, 915, 916, 920, 940, 972
GO:0050818	regulation of coagulation	GOBP	69	-0.0621822	0.679473	1.6199e-07	3.72871e-06	up in HPV(-)	10544, 10630, 1906, 196527, 2149, 2150, 2152, 2191, 222537, 286133, 302, 308, 3170, 3848, 5054, 5154, 5155, 5270, 5328, 5578, 5592, 5624, 7057, 710, 84959, 857, 948
GO:0006807	nitrogen compound metabolic process	GOBP	5980	0.0115419	1.07436	1.69173e-07	3.84166e-06	up in HPV(+)	10009, 100101467, 100128927, 100129654, 10013, 100131390, 100131827, 10020, 100271715, 100289635, 100289678, 100316904, 10036, 10044, 10051, 10062, 10075, 10087, 101, 10112, 10125, 10157, 1017, 10181, 10194, 10224, 10235, 10236, 10243, 10250, 10266, 1027, 10270, 1028, 10283, 1029, 10309, 10318, 1032, 10333, 10336, 10347, 10352, 10380, 10389, 10390, 10472, 10475, 10481, 10499, 105, 10521, 10522, 1…
GO:0014031	mesenchymal cell development	GOBP	126	-0.0502973	0.731558	1.68646e-07	3.84166e-06	up in HPV(-)	10371, 10512, 1072, 11171, 1277, 145258, 147906, 182, 1906, 1909, 1942, 1947, 2295, 2303, 2316, 25805, 25937, 2637, 26508, 2668, 283149, 3084, 3091, 3170, 359845, 4017, 4488, 5077, 51384, 54949, 57142, 58495, 6422, 6423, 650, 6591, 6608, 6615, 6664, 6899, 7040, 7041, 7046, 7080, 7291, 7472, 7474, 8091, 8828, 8829, 90, 9241
GO:0090257	regulation of muscle system process	GOBP	154	-0.0466703	0.748236	1.68811e-07	3.84166e-06	up in HPV(-)	100, 10052, 10398, 10539, 1131, 1264, 132, 136, 1482, 1490, 152, 1613, 183, 1906, 2149, 23630, 2626, 2697, 3270, 3728, 3753, 4608, 4633, 4634, 4656, 477, 4842, 5350, 5578, 55800, 5592, 56923, 5743, 6324, 6327, 6330, 6331, 6588, 6640, 6717, 6722, 6915, 7125, 7134, 7135, 7137, 7138, 7139, 7140, 7168, 7273, 775, 817, 845, 84676, 857, 859, 8877, 8996, 9446, 9472
GO:0002460	adaptive immune response based on somatic recombination of immune receptors built from immunoglobulin superfamily domains	GOBP	174	0.0359271	1.25016	1.71576e-07	3.8616e-06	up in HPV(+)	10148, 10333, 10538, 10673, 10859, 115650, 1191, 1378, 1380, 1512, 2207, 2208, 2209, 2302, 2956, 30009, 3108, 3119, 3120, 3123, 3127, 3458, 355, 3593, 3594, 3635, 3662, 3718, 4049, 4179, 4292, 4436, 4791, 50943, 51311, 51561, 54440, 55340, 57379, 5777, 5971, 602, 6097, 6363, 64218, 6693, 695, 712, 7124, 713, 714, 718, 7186, 727, 7292, 729230, 730, 733, 84174, 8741, 9156, 925, 939, 940, 9466, 959,…
GO:0008016	regulation of heart contraction	GOBP	126	-0.0502795	0.731639	1.70833e-07	3.8616e-06	up in HPV(-)	100, 10052, 10345, 10371, 10539, 133, 1482, 1490, 1674, 1839, 1906, 23630, 2626, 2697, 27129, 3270, 3728, 3753, 3768, 4205, 4624, 4625, 4634, 4635, 477, 4842, 5350, 5578, 55800, 6271, 6324, 6327, 6330, 6331, 6640, 6717, 7054, 7067, 7139, 7168, 7531, 775, 8048, 817, 845, 857, 859, 8912, 9446
GO:0007049	cell cycle	GOBP	1417	0.0172749	1.11333	1.83673e-07	4.11559e-06	up in HPV(+)	10018, 10036, 10051, 10112, 1017, 1027, 10270, 10274, 1028, 1029, 10309, 1032, 10388, 10403, 10426, 10592, 10595, 1060, 10600, 10614, 10628, 1063, 10636, 10657, 10714, 10733, 10734, 10859, 10869, 10907, 10919, 10950, 10983, 11004, 11022, 11040, 11078, 11113, 11130, 11144, 11180, 11186, 11190, 114799, 115106, 116, 117583, 121441, 122402, 127933, 128239, 131870, 1326, 132660, 133746, 134353, 134359…
GO:0071840	cellular component organization or biogenesis	GOBP	4467	-0.0121268	0.927407	1.89336e-07	4.22378e-06	up in HPV(-)	1000, 1001, 1002, 10049, 10052, 10059, 1006, 10071, 1009, 10095, 10096, 10100, 10105, 10109, 1012, 10128, 1013, 10133, 10134, 10179, 10188, 10196, 10200, 10211, 10319, 10324, 10344, 10345, 10360, 10371, 10381, 10391, 103910, 10395, 10398, 10411, 10417, 10435, 10436, 10438, 10440, 10452, 10458, 10467, 10471, 10480, 10484, 10487, 10490, 10493, 10494, 10505, 10512, 10528, 10534, 10540, 10570, 10576,…
GO:0001525	angiogenesis	GOBP	350	-0.0334646	0.812232	1.9762e-07	4.3887e-06	up in HPV(-)	10016, 1012, 10411, 10553, 113026, 1282, 1284, 1295, 1306, 133, 14, 1464, 147372, 1490, 182, 183, 1906, 1909, 1942, 1948, 1950, 2028, 2048, 2049, 2050, 2069, 2152, 2303, 23213, 2335, 23509, 255324, 2624, 2626, 2637, 27286, 28996, 290, 302, 306, 3091, 3164, 347, 3491, 3552, 3569, 3576, 3606, 3678, 3690, 3848, 388, 4017, 4162, 4240, 4313, 4323, 4627, 4776, 5054, 51162, 51330, 5154, 5159, 55273, 557…
GO:0048598	embryonic morphogenesis	GOBP	495	-0.0288902	0.835653	1.98462e-07	4.3887e-06	up in HPV(-)	100506013, 10395, 10413, 1072, 10787, 10804, 10959, 116039, 124590, 1280, 1284, 1289, 1290, 1291, 1295, 129880, 1301, 133, 144165, 145258, 1482, 153572, 1738, 1746, 1749, 1848, 1906, 1942, 2019, 2048, 2070, 2131, 2132, 2201, 221833, 22943, 2295, 2303, 23135, 23213, 23242, 2335, 2535, 25806, 2624, 2626, 2637, 2668, 2697, 2719, 2735, 2736, 2768, 2778, 28514, 28996, 3091, 3170, 3198, 3207, 3209, 321…
GO:0035987	endodermal cell differentiation	GOBP	39	-0.0742605	0.630338	1.99454e-07	4.39147e-06	up in HPV(-)	1284, 1289, 1290, 1291, 1295, 1301, 1848, 22943, 2335, 3624, 3678, 3693, 3909, 3912, 4313, 4323, 8091
GO:0002697	regulation of immune effector process	GOBP	225	0.0330985	1.22838	2.11259e-07	4.63124e-06	up in HPV(+)	10077, 10475, 10859, 11314, 117157, 1378, 1794, 200316, 2206, 2207, 2208, 2209, 2268, 2302, 255520, 259197, 2867, 30009, 3055, 3109, 340061, 3458, 3559, 3593, 3594, 3600, 3662, 3718, 3902, 4049, 4067, 4068, 409, 4179, 4277, 4602, 4843, 50943, 51237, 51561, 5199, 54440, 55340, 5777, 5879, 60489, 6363, 6693, 6776, 6850, 695, 7105, 7124, 718, 7186, 727, 7292, 729230, 7293, 730, 733, 84106, 8741, 876…
GO:0090288	negative regulation of cellular response to growth factor stimulus	GOBP	89	-0.0565306	0.703762	2.24335e-07	4.89668e-06	up in HPV(-)	10016, 11171, 135228, 183, 2200, 2201, 23089, 23213, 23625, 25805, 2734, 2817, 283149, 3309, 4052, 4734, 50515, 54829, 5499, 55959, 5654, 56937, 57154, 58533, 64750, 6498, 7040, 7041, 7046, 7048, 7057, 7080, 7316, 7474, 81792, 858, 94031
GO:0002449	lymphocyte mediated immunity	GOBP	162	0.0363993	1.25384	2.30305e-07	5.00543e-06	up in HPV(+)	10538, 10859, 117157, 1191, 127544, 1378, 1380, 1512, 2207, 2208, 2209, 2302, 259197, 2956, 30009, 3108, 3119, 3120, 3123, 3127, 3458, 355, 3593, 3594, 3635, 387836, 3902, 4049, 4068, 409, 4179, 4292, 4436, 50943, 51311, 51561, 54440, 55340, 57379, 5777, 57823, 602, 6693, 6776, 695, 712, 7124, 713, 714, 718, 7186, 727, 7292, 730, 733, 84174, 8741, 9156, 925, 939, 940, 9466, 959, 972
GO:0060560	developmental growth involved in morphogenesis	GOBP	137	-0.0483152	0.740626	2.34376e-07	5.07214e-06	up in HPV(-)	10371, 10505, 1311, 150465, 2016, 2258, 23242, 2335, 351, 374, 3913, 3984, 4131, 4137, 4488, 4692, 4803, 5048, 51083, 51330, 5447, 55083, 5523, 55558, 57142, 5744, 5754, 57611, 5914, 6299, 6422, 6423, 652, 6608, 6909, 7022, 7040, 7057, 7473, 7474, 7477, 81565, 85407, 8828, 8829, 8851, 91584, 9201, 9625
GO:0060538	skeletal muscle organ development	GOBP	162	-0.0453377	0.754458	2.36415e-07	5.09449e-06	up in HPV(-)	10324, 11023, 1144, 144165, 150572, 1649, 1827, 2010, 22943, 23764, 245806, 246329, 26287, 26508, 26576, 27063, 27231, 2817, 283149, 29895, 3110, 3164, 3235, 3236, 3399, 3486, 3488, 4233, 4618, 463, 4634, 4656, 5081, 56603, 57462, 58, 6258, 6498, 652, 6608, 6664, 668, 6899, 6926, 7040, 7291, 779, 8048, 8531, 857, 858, 90, 9099, 91653, 9242, 92737
GO:0002263	cell activation involved in immune response	GOBP	147	0.0373539	1.2613	2.44576e-07	5.21559e-06	up in HPV(+)	10125, 10333, 10538, 10859, 11314, 117157, 1524, 159296, 1794, 1880, 2185, 2206, 2207, 2268, 22904, 23228, 27040, 2956, 30009, 3109, 3458, 3593, 3594, 3662, 3683, 3718, 3815, 3964, 4064, 4067, 4179, 4292, 4436, 4542, 4602, 50943, 51284, 51311, 51561, 5294, 5581, 5734, 57379, 5971, 602, 6097, 6348, 6363, 64218, 6814, 6850, 695, 7098, 7157, 7292, 729230, 7305, 7462, 8320, 84106, 8741, 911, 9156, 94…
GO:0002366	leukocyte activation involved in immune response	GOBP	147	0.0373539	1.2613	2.44576e-07	5.21559e-06	up in HPV(+)	10125, 10333, 10538, 10859, 11314, 117157, 1524, 159296, 1794, 1880, 2185, 2206, 2207, 2268, 22904, 23228, 27040, 2956, 30009, 3109, 3458, 3593, 3594, 3662, 3683, 3718, 3815, 3964, 4064, 4067, 4179, 4292, 4436, 4542, 4602, 50943, 51284, 51311, 51561, 5294, 5581, 5734, 57379, 5971, 602, 6097, 6348, 6363, 64218, 6814, 6850, 695, 7098, 7157, 7292, 729230, 7305, 7462, 8320, 84106, 8741, 911, 9156, 94…
GO:0048513	organ development	GOBP	2417	-0.0146607	0.912917	2.45629e-07	5.21559e-06	up in HPV(-)	100, 1001, 100506013, 10052, 10058, 10100, 10202, 1021, 10234, 10272, 10290, 10319, 10324, 10371, 10395, 1041, 10413, 10468, 1051, 10512, 1053, 10555, 10579, 10587, 10630, 10634, 1072, 10787, 10804, 10913, 10959, 10971, 10972, 10999, 11023, 11171, 11173, 113026, 11331, 1144, 1152, 116039, 119, 123016, 124590, 1277, 1278, 1280, 1281, 1282, 1289, 1290, 129446, 1295, 129880, 1300, 1301, 1305, 1308, …
GO:0048762	mesenchymal cell differentiation	GOBP	137	-0.0482475	0.740937	2.46155e-07	5.21559e-06	up in HPV(-)	10371, 10512, 1072, 11171, 1277, 145258, 147906, 182, 1906, 1909, 1942, 1947, 2295, 2303, 2316, 25805, 25937, 2637, 26508, 2668, 283149, 3084, 3091, 3170, 359845, 4017, 4488, 5077, 51384, 54949, 57142, 58495, 6422, 6423, 650, 652, 6591, 6608, 6615, 6664, 6899, 7040, 7041, 7046, 7080, 7291, 7472, 7474, 80326, 8091, 8828, 8829, 90, 9241
GO:0071559	response to transforming growth factor beta	GOBP	201	-0.0416062	0.772158	2.5367e-07	5.33023e-06	up in HPV(-)	10979, 11171, 1277, 1278, 1281, 1284, 135228, 1874, 201163, 2200, 2201, 2280, 22938, 23089, 23625, 25805, 25937, 27063, 2734, 283149, 28996, 3309, 3693, 383, 3987, 4052, 4609, 4738, 5045, 50507, 50515, 5054, 5138, 5139, 5154, 5155, 5159, 54829, 5499, 5654, 56937, 57154, 5796, 5829, 58533, 6375, 6422, 64750, 6498, 6660, 6664, 7040, 7041, 7046, 7048, 7050, 7057, 7071, 7080, 7316, 7472, 7474, 7476, …
GO:0071560	cellular response to transforming growth factor beta stimulus	GOBP	201	-0.0416062	0.772158	2.5367e-07	5.33023e-06	up in HPV(-)	10979, 11171, 1277, 1278, 1281, 1284, 135228, 1874, 201163, 2200, 2201, 2280, 22938, 23089, 23625, 25805, 25937, 27063, 2734, 283149, 28996, 3309, 3693, 383, 3987, 4052, 4609, 4738, 5045, 50507, 50515, 5054, 5138, 5139, 5154, 5155, 5159, 54829, 5499, 5654, 56937, 57154, 5796, 5829, 58533, 6375, 6422, 64750, 6498, 6660, 6664, 7040, 7041, 7046, 7048, 7050, 7057, 7071, 7080, 7316, 7472, 7474, 7476, …
GO:0007519	skeletal muscle tissue development	GOBP	155	-0.0459795	0.751454	2.60114e-07	5.44304e-06	up in HPV(-)	10324, 11023, 1144, 144165, 150572, 1649, 1827, 2010, 22943, 23764, 245806, 246329, 26287, 26508, 26576, 27063, 27231, 2817, 283149, 29895, 3164, 3235, 3236, 3399, 3486, 3488, 4233, 4618, 463, 4634, 4656, 5081, 56603, 57462, 58, 6258, 6498, 652, 6608, 6664, 668, 6899, 6926, 7040, 7291, 779, 8048, 8531, 857, 858, 90, 9099, 91653, 9242, 92737
GO:0009954	proximal/distal pattern formation	GOBP	27	-0.0821864	0.600042	2.92252e-07	6.09038e-06	up in HPV(-)	153572, 1745, 1746, 2019, 221833, 2735, 2736, 3207, 3227, 3235, 3236, 3237, 56603, 79192
GO:0048534	hematopoietic or lymphoid organ development	GOBP	620	0.0231925	1.15504	3.0161e-07	6.25965e-06	up in HPV(+)	10018, 101, 1028, 1029, 10425, 10461, 10537, 10538, 10859, 11006, 122618, 1230, 1236, 133522, 1380, 139716, 140685, 142, 1435, 1436, 146206, 147808, 1493, 150372, 157570, 159296, 164668, 167153, 170575, 1777, 1794, 1880, 2039, 204851, 2122, 2185, 219790, 2235, 22806, 22904, 2302, 2313, 23218, 23228, 2323, 23335, 23495, 23598, 23648, 2529, 257101, 26013, 26191, 27033, 2872, 28959, 29760, 29843, 30…
GO:0010648	negative regulation of cell communication	GOBP	802	-0.0230213	0.866695	3.33492e-07	6.89307e-06	up in HPV(-)	100, 1000, 10016, 10105, 10197, 10252, 10272, 10395, 10413, 10468, 10617, 10625, 10769, 11072, 11171, 112464, 11331, 115265, 1280, 133, 135228, 1437, 144165, 145258, 147040, 147495, 147906, 1482, 150290, 1649, 1745, 1746, 183, 1845, 1848, 1852, 1950, 197131, 201163, 2017, 207, 2150, 2200, 2201, 22821, 22941, 22943, 2305, 2308, 23089, 23189, 23213, 23286, 23365, 23532, 23624, 23625, 23677, 2537, 2…
GO:1901362	organic cyclic compound biosynthetic process	GOBP	3467	0.0124271	1.08029	3.43293e-07	7.06682e-06	up in HPV(+)	10009, 100101467, 100128927, 100129654, 10013, 100131390, 100131827, 100289635, 100289678, 100316904, 10036, 10062, 101, 1017, 10194, 10224, 10243, 10250, 10266, 1027, 1028, 1029, 10318, 1032, 10336, 10389, 10472, 10475, 10481, 10499, 10521, 10522, 10533, 10538, 10595, 10600, 10614, 10628, 1063, 10636, 10656, 10657, 10714, 10745, 10781, 10782, 1080, 10847, 10859, 10861, 10865, 10915, 10919, 10943…
GO:0010468	regulation of gene expression	GOBP	3450	0.0124221	1.08026	3.60011e-07	7.38096e-06	up in HPV(+)	10009, 100101467, 100128927, 100129654, 10013, 100131390, 100131827, 100289635, 100289678, 100316904, 10036, 10062, 101, 10103, 1017, 10181, 10194, 10224, 10266, 1027, 1028, 1029, 10318, 10336, 10389, 10437, 10472, 10475, 10481, 10499, 10521, 10522, 10538, 10595, 10600, 10614, 10628, 1063, 10636, 10656, 10657, 10745, 10768, 10781, 10782, 10847, 10859, 10865, 10869, 10915, 10919, 10943, 11022, 110…
GO:0050678	regulation of epithelial cell proliferation	GOBP	225	-0.0393316	0.783151	3.65576e-07	7.46483e-06	up in HPV(-)	1001, 10016, 1012, 1021, 10344, 10413, 11171, 11331, 116039, 1515, 1749, 1909, 1948, 2069, 207, 2118, 2152, 23213, 255324, 2719, 2810, 3091, 3164, 3265, 3569, 3690, 383, 3912, 3915, 3987, 4163, 4609, 4830, 4831, 51162, 5155, 5268, 5365, 5467, 55679, 5578, 57521, 5796, 58189, 58495, 595, 60485, 6331, 64127, 6422, 6423, 646, 650, 652, 6591, 6608, 6664, 6678, 6899, 7039, 7040, 7046, 7057, 7291, 7421…
GO:0055006	cardiac cell development	GOBP	50	-0.067587	0.657029	3.89106e-07	7.91339e-06	up in HPV(-)	10290, 1482, 165904, 182, 183, 2274, 23363, 2626, 4000, 4205, 4624, 4628, 4633, 5159, 652, 6722, 6926, 70, 7273, 8048, 8557, 859, 91624, 9472
GO:0001706	endoderm formation	GOBP	49	-0.0680084	0.655311	3.9296e-07	7.9598e-06	up in HPV(-)	1284, 1289, 1290, 1291, 1295, 1301, 1848, 22943, 2335, 2626, 3624, 3678, 3693, 3909, 3912, 4313, 4323, 8091, 9241
GO:0060443	mammary gland morphogenesis	GOBP	51	-0.0671249	0.658919	3.9683e-07	8.00616e-06	up in HPV(-)	11331, 2118, 2119, 25928, 2736, 3488, 374, 383, 4488, 5077, 5744, 6424, 652, 6909, 6926, 7022, 7040, 7048, 7421, 7474, 857, 859
GO:0048858	cell projection morphogenesis	GOBP	697	-0.0243104	0.859779	4.01643e-07	8.07111e-06	up in HPV(-)	1009, 10096, 10211, 10371, 10381, 103910, 10398, 10417, 10458, 10487, 10494, 10505, 10512, 10570, 107, 1072, 1073, 11023, 11202, 123016, 1280, 1281, 1282, 1284, 1287, 1289, 1290, 1291, 1292, 129880, 1400, 1459, 1460, 148738, 150465, 1523, 170302, 1749, 1809, 1874, 1942, 1944, 1946, 1947, 1948, 1949, 199221, 2016, 2043, 2048, 2049, 2118, 2131, 2258, 22873, 22885, 22897, 23114, 2316, 23189, 23242, …
GO:0030509	BMP signaling pathway	GOBP	100	-0.0533364	0.717872	4.15554e-07	8.31764e-06	up in HPV(-)	10272, 10468, 11167, 1482, 148738, 1749, 2200, 22943, 23213, 25928, 2626, 2719, 28996, 3209, 3491, 392255, 4488, 4624, 50964, 55273, 5654, 57154, 6422, 6423, 644815, 64750, 650, 652, 658, 6664, 7474, 857, 860, 8646, 90, 9241, 94031
GO:0023057	negative regulation of signaling	GOBP	802	-0.0227984	0.867896	4.36048e-07	8.69349e-06	up in HPV(-)	100, 1000, 10016, 10105, 10133, 10197, 10252, 10272, 10395, 10413, 10468, 10617, 10625, 10769, 11072, 11171, 112464, 11331, 115265, 1280, 133, 135228, 1437, 144165, 145258, 147040, 147495, 147906, 1482, 150290, 1649, 1745, 1746, 183, 1845, 1848, 1852, 1950, 197131, 201163, 2017, 207, 2150, 2200, 2201, 22821, 22941, 22943, 2305, 2308, 23089, 23189, 23213, 23286, 23365, 23532, 23624, 23625, 23677, …
GO:0016070	RNA metabolic process	GOBP	3672	0.0121169	1.07821	4.41393e-07	8.76554e-06	up in HPV(+)	10009, 100101467, 100128927, 100129654, 10013, 100131390, 100131827, 100289635, 100289678, 100316904, 10036, 10062, 101, 1017, 10181, 10194, 10224, 10236, 10250, 1027, 1028, 10283, 1029, 10318, 10336, 10352, 10389, 10472, 10475, 10481, 10499, 105, 10521, 10522, 10533, 10535, 10538, 10595, 10600, 10614, 10628, 1063, 10636, 10656, 10657, 10659, 10745, 10768, 10781, 10782, 10847, 10859, 10865, 10907…
GO:0035239	tube morphogenesis	GOBP	311	-0.0341689	0.808684	4.69838e-07	9.29398e-06	up in HPV(-)	10395, 10413, 10630, 1072, 10787, 10913, 11331, 1282, 129880, 133, 144165, 1460, 1482, 153572, 170690, 183, 1896, 1906, 1909, 1950, 2118, 2119, 2303, 23242, 2535, 25928, 2626, 2637, 2668, 2697, 2719, 2736, 28514, 3091, 3170, 3198, 3207, 3217, 3237, 3265, 374, 3845, 4233, 4323, 4488, 4609, 4776, 5058, 5077, 5216, 54815, 5499, 55036, 55083, 55636, 55740, 57167, 5744, 5754, 578, 5829, 58495, 5914, 6…
GO:0014902	myotube differentiation	GOBP	90	-0.0551003	0.710045	4.94556e-07	9.74486e-06	up in HPV(-)	10324, 10345, 10938, 144165, 1482, 150572, 1649, 1827, 221662, 246329, 26287, 27231, 30846, 3399, 3486, 4233, 4627, 463, 4656, 4842, 56603, 57462, 58, 64754, 652, 6608, 6899, 6926, 7040, 7067, 779, 8038, 84814, 858, 859, 8912, 91653, 9200, 92737
GO:0035051	cardiocyte differentiation	GOBP	98	-0.0534003	0.717587	5.13123e-07	1.00715e-05	up in HPV(-)	10290, 144165, 1482, 165904, 182, 183, 1948, 2274, 22943, 23135, 23363, 2626, 3084, 3728, 4000, 4205, 4624, 4628, 4633, 50507, 5159, 5914, 650, 652, 6608, 6722, 6909, 6926, 70, 7273, 7291, 8048, 8557, 859, 90, 91624, 9472, 9718
GO:0002768	immune response-regulating cell surface receptor signaling pathway	GOBP	307	0.0291691	1.19874	5.39895e-07	1.05561e-05	up in HPV(+)	10125, 10163, 1027, 10859, 11314, 1236, 1378, 1380, 146206, 1493, 150372, 151888, 152831, 192670, 2065, 2206, 2207, 2209, 2210, 2219, 2247, 2261, 2268, 23228, 23239, 2475, 257144, 257397, 26191, 26523, 26999, 27040, 2822, 2867, 3055, 3071, 3113, 3115, 3117, 3118, 3119, 3120, 3122, 3123, 3127, 3551, 3635, 3702, 3708, 3815, 387357, 3937, 4067, 4193, 4214, 4254, 4277, 4303, 4332, 4343, 4690, 4790, 4…
GO:0030154	cell differentiation	GOBP	2737	-0.013569	0.919132	5.54099e-07	1.07921e-05	up in HPV(-)	100, 1000, 1001, 10052, 1009, 10096, 10100, 10109, 1013, 10202, 1021, 10211, 10234, 10272, 10290, 10319, 10324, 10345, 10371, 10381, 103910, 10398, 1041, 10411, 10413, 10417, 10458, 10468, 10487, 10494, 10501, 10505, 1051, 10512, 10514, 1053, 10553, 10570, 10579, 10634, 1066, 107, 1072, 1073, 10810, 10913, 10938, 10979, 10981, 11007, 11023, 11075, 11155, 11171, 11173, 11197, 11202, 11281, 116039,…
GO:0003205	cardiac chamber development	GOBP	116	-0.0501015	0.732449	5.59282e-07	1.08513e-05	up in HPV(-)	10512, 129446, 1301, 1482, 161882, 182, 2274, 2280, 2303, 2535, 2626, 26508, 3084, 3091, 3209, 3491, 4488, 4624, 4625, 4633, 4634, 55742, 57167, 57493, 58495, 5914, 5950, 60485, 6299, 6331, 6423, 652, 6604, 6608, 6664, 6722, 6899, 6909, 6926, 7134, 7135, 7137, 7139, 7168, 7472, 7474, 7481, 7798, 859, 90, 9321, 9510
GO:0006937	regulation of muscle contraction	GOBP	124	-0.0487416	0.738665	6.14587e-07	1.18789e-05	up in HPV(-)	100, 10052, 10398, 1131, 1264, 136, 1482, 1490, 152, 1613, 1906, 2149, 23630, 2626, 2697, 3270, 3728, 3753, 4608, 4633, 4634, 477, 4842, 5350, 5578, 55800, 5592, 56923, 5743, 6324, 6327, 6330, 6331, 6640, 6717, 6722, 6915, 7125, 7134, 7135, 7137, 7138, 7139, 7140, 7168, 775, 817, 845, 857, 859, 8877, 9446
GO:0043383	negative T cell selection	GOBP	11	0.0639961	1.48841	6.43295e-07	1.23865e-05	up in HPV(+)	1236, 1794, 355, 387357, 6693, 7535, 916, 940, 972
GO:0003206	cardiac chamber morphogenesis	GOBP	97	-0.0529988	0.719379	7.52814e-07	1.44404e-05	up in HPV(-)	10512, 1301, 1482, 161882, 182, 2274, 2280, 2303, 2535, 2626, 26508, 3084, 3091, 3491, 4488, 4624, 4625, 4633, 4634, 55742, 57493, 58495, 5914, 5950, 60485, 6423, 6604, 6608, 6664, 6722, 6899, 6909, 6926, 7134, 7135, 7137, 7139, 7168, 7472, 7474, 7481, 859, 90, 9510
GO:0003013	circulatory system process	GOBP	329	-0.0327027	0.816087	8.43261e-07	1.61142e-05	up in HPV(-)	100, 10345, 10371, 10539, 10699, 1131, 1278, 133, 136, 1482, 1490, 152, 1674, 1727, 1827, 183, 1839, 185, 1874, 1906, 1909, 2028, 207, 2149, 2150, 2303, 23630, 2621, 2626, 26509, 2697, 27129, 2729, 290, 3269, 3270, 3291, 3352, 3363, 3728, 3753, 3768, 4018, 4205, 4624, 4625, 4632, 4633, 4634, 4635, 4688, 477, 4842, 4882, 5125, 5138, 5139, 5155, 5331, 5350, 5467, 55636, 5578, 55800, 5592, 5606, 574…
GO:0008015	blood circulation	GOBP	327	-0.032667	0.816268	9.34081e-07	1.77827e-05	up in HPV(-)	100, 10345, 10371, 10539, 10699, 1131, 1278, 133, 136, 1482, 1490, 152, 1674, 1727, 1827, 183, 1839, 185, 1874, 1906, 1909, 2028, 207, 2149, 2150, 2303, 23630, 2621, 2626, 26509, 2697, 27129, 2729, 290, 3269, 3270, 3291, 3352, 3363, 3728, 3753, 3768, 4018, 4205, 4624, 4625, 4632, 4633, 4634, 4635, 4688, 477, 4842, 4882, 5125, 5138, 5139, 5155, 5331, 5350, 5467, 55636, 5578, 55800, 5592, 5606, 574…
GO:0016064	immunoglobulin mediated immune response	GOBP	86	0.0415221	1.2944	1.0393e-06	1.97116e-05	up in HPV(+)	10538, 1191, 1378, 1380, 2207, 2208, 2209, 2302, 2956, 30009, 3108, 3119, 3120, 3123, 3127, 3458, 3635, 4049, 4179, 4292, 4436, 50943, 51311, 55340, 57379, 5777, 602, 712, 7124, 713, 714, 718, 727, 7292, 730, 733, 8741, 9156, 939, 940, 9466, 959, 972
GO:0003002	regionalization	GOBP	290	-0.0341849	0.808604	1.07166e-06	2.02497e-05	up in HPV(-)	10512, 10655, 10787, 145258, 1482, 153572, 1649, 1745, 1746, 1848, 1906, 2016, 2018, 2019, 221833, 22943, 2303, 23237, 23242, 23509, 25806, 2626, 2637, 2668, 27130, 2719, 2735, 2736, 28514, 28996, 3110, 3170, 3198, 3207, 3215, 3216, 3217, 3218, 3227, 3229, 3235, 3236, 3237, 3955, 4010, 4188, 4488, 4618, 4909, 5077, 5081, 50964, 5125, 5523, 5649, 56603, 58495, 58524, 60529, 6422, 6423, 64399, 650,…
GO:0007286	spermatid development	GOBP	66	0.0442448	1.31648	1.08459e-06	2.04177e-05	up in HPV(+)	1080, 10919, 11144, 124626, 150365, 163589, 29118, 3148, 347732, 3622, 3815, 4948, 50511, 51087, 51361, 55342, 55818, 57082, 7110, 83983, 84225, 90780, 9148, 9576, 9985
GO:0030510	regulation of BMP signaling pathway	GOBP	61	-0.0614835	0.682429	1.15882e-06	2.17343e-05	up in HPV(-)	10272, 2200, 22943, 23213, 25928, 2626, 2719, 28996, 3209, 3491, 4488, 50964, 5654, 57154, 6422, 6423, 652, 6664, 7474, 857, 8646, 9241, 94031
GO:0007167	enzyme linked receptor protein signaling pathway	GOBP	876	-0.0210807	0.877211	1.22994e-06	2.29808e-05	up in HPV(-)	1001, 10016, 1012, 10252, 10272, 10458, 10468, 107, 10849, 10979, 11167, 11171, 113, 121512, 1278, 1281, 133396, 135228, 1398, 1460, 1464, 147372, 1482, 148738, 1490, 152, 1749, 1761, 183, 1839, 1845, 1848, 1874, 1942, 1944, 1946, 1947, 1948, 1949, 1950, 1981, 201163, 2043, 2048, 2049, 2050, 2069, 207, 2152, 2200, 2201, 2250, 2280, 22938, 22943, 2303, 2308, 23089, 23189, 23213, 23365, 23433, 2362…
GO:0016049	cell growth	GOBP	350	-0.0314196	0.82262	1.23436e-06	2.29808e-05	up in HPV(-)	10071, 1012, 10371, 10505, 10634, 11007, 1410, 147906, 1490, 150465, 151242, 1594, 183, 1839, 185, 1906, 201163, 2016, 207, 2137, 2182, 2258, 2273, 2305, 23242, 2335, 23677, 259230, 26153, 2626, 27000, 2786, 2810, 29948, 3084, 323, 3300, 3485, 3486, 3487, 3488, 3489, 3490, 3491, 351, 3569, 3624, 3690, 3872, 3913, 3984, 4131, 4137, 4323, 4633, 4692, 4803, 5048, 51009, 51083, 51232, 51330, 5155, 52…
GO:0006325	chromatin organization	GOBP	541	0.0232093	1.15516	1.29483e-06	2.36715e-05	up in HPV(+)	10013, 10036, 10075, 1017, 1029, 10499, 10600, 10847, 10865, 10919, 10943, 1105, 11169, 11240, 112869, 114803, 117143, 148479, 1643, 1786, 1788, 196528, 2005, 2099, 2139, 2140, 2145, 2146, 22823, 23030, 23081, 23133, 23338, 23411, 23421, 23466, 23492, 23512, 25862, 26009, 26013, 26122, 26147, 27005, 27154, 2879, 29072, 29128, 3070, 30827, 3141, 3148, 3150, 3169, 3275, 3621, 3622, 3662, 3717, 3871…
GO:0006942	regulation of striated muscle contraction	GOBP	71	-0.0582245	0.696392	1.27882e-06	2.36715e-05	up in HPV(-)	10052, 1482, 1490, 23630, 2626, 2697, 3270, 3728, 3753, 4608, 4633, 4634, 477, 4842, 5350, 55800, 6324, 6327, 6330, 6331, 6640, 6717, 7135, 7140, 775, 817, 845, 859, 9446
GO:0030193	regulation of blood coagulation	GOBP	64	-0.0603073	0.687436	1.29151e-06	2.36715e-05	up in HPV(-)	10630, 1906, 196527, 2149, 2150, 2152, 2191, 286133, 302, 3170, 3848, 5054, 5154, 5155, 5270, 5328, 5578, 5592, 5624, 7057, 710, 84959, 857, 948
GO:0050679	positive regulation of epithelial cell proliferation	GOBP	124	-0.0476208	0.743829	1.29039e-06	2.36715e-05	up in HPV(-)	1001, 10016, 1012, 10344, 116039, 1749, 207, 2152, 255324, 3091, 3164, 3265, 3569, 3690, 383, 3912, 3915, 4609, 4830, 4831, 51162, 5155, 5365, 5578, 57521, 595, 6331, 64127, 6422, 646, 650, 652, 6608, 6664, 6899, 7039, 7040, 7291, 7424, 7472, 7474, 7476, 7857, 858, 8828, 8829, 9096, 9241
GO:1900046	regulation of hemostasis	GOBP	64	-0.0603073	0.687436	1.29151e-06	2.36715e-05	up in HPV(-)	10630, 1906, 196527, 2149, 2150, 2152, 2191, 286133, 302, 3170, 3848, 5054, 5154, 5155, 5270, 5328, 5578, 5592, 5624, 7057, 710, 84959, 857, 948
GO:0002376	immune system process	GOBP	1941	0.0142816	1.09281	1.32263e-06	2.40927e-05	up in HPV(+)	100049587, 10018, 10062, 10077, 10087, 101, 10120, 10125, 10148, 10163, 10219, 10225, 10261, 1027, 1028, 1029, 10318, 10326, 10333, 10385, 10425, 10437, 10461, 10462, 10475, 10537, 10538, 10628, 10673, 10859, 10870, 10906, 11004, 11006, 11074, 111, 11126, 11151, 112, 11240, 11277, 11314, 1139, 115650, 116, 117157, 118788, 1191, 120425, 122618, 1230, 1233, 1234, 1235, 1236, 1237, 1240, 126259, 126…
GO:0048863	stem cell differentiation	GOBP	276	-0.0346229	0.806406	1.33339e-06	2.42017e-05	up in HPV(-)	1000, 1021, 10371, 10413, 10512, 1072, 11171, 11281, 1277, 144165, 145258, 147906, 1482, 182, 1906, 1909, 1942, 1947, 2118, 2295, 2303, 2316, 25805, 25937, 2624, 2626, 2637, 26508, 2668, 283149, 28514, 3084, 3091, 3170, 359845, 3720, 3728, 3976, 399694, 4017, 4488, 4909, 5077, 51384, 51586, 54949, 5610, 57142, 57167, 5717, 58495, 590, 60485, 6343, 6422, 6423, 650, 652, 6591, 6608, 6615, 6660, 666…
GO:0007059	chromosome segregation	GOBP	156	0.0350723	1.24354	1.36164e-06	2.46262e-05	up in HPV(+)	10051, 10270, 10274, 10403, 10592, 1060, 1063, 10636, 10734, 11004, 11113, 11130, 114799, 146909, 148479, 151246, 151648, 152185, 157570, 220134, 23047, 23126, 23137, 23244, 23383, 25936, 27127, 29127, 324, 348995, 378708, 3833, 3834, 387103, 4292, 4751, 51203, 55755, 55920, 57082, 5889, 672, 7153, 7155, 7175, 79980, 8243, 83852, 83903, 9126, 9232, 9700, 9985
GO:0001958	endochondral ossification	GOBP	27	-0.0790299	0.611928	1.44816e-06	2.60053e-05	up in HPV(-)	1277, 1280, 1300, 1305, 1749, 249, 2778, 3636, 4322, 4323, 4325, 5744, 652, 860
GO:0036075	replacement ossification	GOBP	27	-0.0790299	0.611928	1.44816e-06	2.60053e-05	up in HPV(-)	1277, 1280, 1300, 1305, 1749, 249, 2778, 3636, 4322, 4323, 4325, 5744, 652, 860
GO:0044249	cellular biosynthetic process	GOBP	4703	0.0109136	1.07018	1.45577e-06	2.60495e-05	up in HPV(+)	10009, 100101467, 100128927, 100129654, 10013, 100131390, 100131827, 10026, 100289635, 100289678, 100316904, 10036, 10062, 10087, 101, 10148, 1017, 10194, 10224, 10243, 10250, 10266, 1027, 1028, 1029, 10318, 1032, 10327, 10333, 10336, 10347, 10352, 10389, 10390, 10472, 10475, 10481, 10499, 10521, 10522, 10533, 10535, 10538, 10595, 10600, 10614, 10628, 1063, 10636, 10656, 10657, 10714, 10721, 1074…
GO:0034645	cellular macromolecule biosynthetic process	GOBP	3900	0.0113466	1.07306	1.53488e-06	2.73685e-05	up in HPV(+)	10009, 100101467, 100128927, 100129654, 10013, 100131390, 100131827, 10026, 100289635, 100289678, 100316904, 10036, 10062, 101, 1017, 10194, 10224, 10250, 1027, 1028, 1029, 10318, 1032, 10336, 10347, 10352, 10389, 10472, 10475, 10481, 10499, 10521, 10522, 10533, 10535, 10538, 10595, 10600, 10614, 10628, 1063, 10636, 10656, 10657, 10714, 10721, 10745, 10781, 10782, 10847, 10859, 10865, 10915, 1091…
GO:0035295	tube development	GOBP	518	-0.0261902	0.849793	1.72907e-06	3.06353e-05	up in HPV(-)	100, 10272, 10395, 10413, 10512, 10630, 1072, 10787, 10913, 11331, 123016, 1281, 1282, 129880, 133, 144165, 145258, 1460, 1482, 1490, 1523, 153572, 170690, 1717, 182, 183, 1896, 1906, 1909, 1950, 1981, 2019, 2049, 2118, 2119, 2295, 2300, 2303, 23242, 2535, 25928, 25937, 26154, 2624, 2626, 2637, 26508, 2668, 2697, 27130, 2719, 2735, 2736, 282679, 28514, 3091, 3110, 3170, 3198, 3207, 3217, 3237, 32…
GO:0055008	cardiac muscle tissue morphogenesis	GOBP	50	-0.0649145	0.668033	1.73019e-06	3.06353e-05	up in HPV(-)	129446, 1301, 1482, 161882, 2280, 2303, 27063, 3084, 4624, 4625, 4633, 4634, 650, 70, 7134, 7135, 7137, 7139, 7168, 7273, 7472, 7474, 8557
GO:0009968	negative regulation of signal transduction	GOBP	771	-0.0219861	0.872289	1.74175e-06	3.07324e-05	up in HPV(-)	100, 1000, 10016, 10105, 10197, 10252, 10272, 10395, 10413, 10468, 10617, 10625, 11072, 11171, 112464, 11331, 115265, 1280, 133, 135228, 1437, 144165, 145258, 147040, 147495, 147906, 1482, 150290, 1649, 1745, 1746, 183, 1845, 1848, 1852, 1950, 197131, 201163, 2017, 207, 2150, 2200, 2201, 22821, 22943, 2305, 2308, 23089, 23189, 23213, 23286, 23365, 23532, 23624, 23625, 23677, 2537, 25805, 25928, 2…
GO:0009059	macromolecule biosynthetic process	GOBP	4005	0.0112007	1.07209	1.78316e-06	3.13539e-05	up in HPV(+)	10009, 100101467, 100128927, 100129654, 10013, 100131390, 100131827, 10026, 100289635, 100289678, 100316904, 10036, 10062, 101, 10148, 1017, 10194, 10224, 10250, 1027, 1028, 1029, 10318, 1032, 10333, 10336, 10347, 10352, 10389, 10472, 10475, 10481, 10499, 10521, 10522, 10533, 10535, 10538, 10595, 10600, 10614, 10628, 1063, 10636, 10656, 10657, 10714, 10721, 10745, 10781, 10782, 10847, 10859, 1086…
GO:0006810	transport	GOBP	3402	-0.0119589	0.928375	1.91186e-06	3.35005e-05	up in HPV(-)	100, 1001, 10016, 10043, 10052, 10058, 10059, 10060, 10061, 10089, 10096, 10105, 10109, 1012, 10121, 10128, 10130, 10133, 10134, 10165, 10175, 10188, 10204, 10226, 10227, 10237, 10244, 10345, 10411, 10440, 10452, 10458, 10476, 10484, 10487, 10490, 10514, 10527, 1053, 10540, 10553, 10597, 10627, 10632, 10642, 10644, 10650, 10651, 10652, 10681, 10699, 107, 1072, 10749, 10758, 10787, 10809, 10894, 1…
GO:0016043	cellular component organization	GOBP	4367	-0.0111004	0.933341	1.99587e-06	3.4852e-05	up in HPV(-)	1000, 1001, 1002, 10049, 10052, 10059, 1006, 10071, 1009, 10095, 10096, 10100, 10105, 10109, 1012, 10128, 1013, 10133, 10134, 10179, 10188, 10196, 10211, 10319, 10324, 10344, 10345, 10371, 10381, 10391, 103910, 10395, 10398, 10411, 10417, 10435, 10440, 10452, 10458, 10467, 10471, 10480, 10484, 10487, 10490, 10493, 10494, 10505, 10512, 10534, 10540, 10570, 10576, 10579, 10602, 10609, 10627, 10630,…
GO:0006986	response to unfolded protein	GOBP	128	-0.0462584	0.750153	2.15396e-06	3.74834e-05	up in HPV(-)	10130, 10525, 10808, 10897, 10954, 11015, 16, 1639, 1649, 1965, 2137, 23071, 25822, 267, 2673, 27129, 27230, 3300, 3309, 3312, 3316, 3320, 3326, 3329, 3576, 4000, 440275, 468, 51009, 51528, 51726, 55033, 55062, 5526, 55738, 55829, 5610, 578, 595, 6464, 64764, 6734, 7057, 7184, 7873, 8614, 871, 8988, 9114
GO:0060562	epithelial tube morphogenesis	GOBP	295	-0.0330336	0.81441	2.22714e-06	3.86242e-05	up in HPV(-)	10395, 10413, 1072, 10787, 11331, 1282, 129880, 133, 144165, 1460, 1482, 153572, 170690, 183, 1906, 1909, 1950, 2118, 2119, 2303, 23242, 2535, 25928, 2626, 2637, 2668, 2697, 2719, 2736, 28514, 3091, 3170, 3207, 3217, 3237, 3265, 374, 3845, 4233, 4323, 4488, 4609, 4776, 5058, 5077, 5216, 54815, 5499, 55036, 55083, 55740, 57167, 5744, 5754, 578, 5829, 58495, 5914, 6299, 6422, 6423, 64399, 650, 652,…
GO:0048515	spermatid differentiation	GOBP	70	0.0427449	1.30427	2.46004e-06	4.25175e-05	up in HPV(+)	1080, 10919, 11144, 124626, 150365, 163589, 29118, 3148, 347732, 3622, 3815, 4948, 50511, 51087, 51361, 55342, 55818, 57082, 7110, 83983, 84225, 90780, 9148, 9576, 9985
GO:0006270	DNA replication initiation	GOBP	27	0.052685	1.38738	2.50414e-06	4.31326e-05	up in HPV(+)	1017, 23649, 4171, 4172, 4173, 4174, 4175, 4176, 4998, 5422, 5426, 5427, 81620, 9134
GO:0006284	base-excision repair	GOBP	44	0.0475433	1.34375	2.55927e-06	4.39327e-05	up in HPV(+)	10075, 10309, 10714, 142, 1763, 2237, 3148, 340533, 3978, 4968, 5111, 5424, 5426, 55170, 55247, 6118, 7157, 7374, 7515, 8930
GO:0060349	bone morphogenesis	GOBP	78	-0.0551437	0.709853	2.57559e-06	4.40634e-05	up in HPV(-)	116039, 1277, 1280, 1300, 1305, 1311, 1749, 249, 2734, 2778, 3207, 3237, 3636, 4322, 4323, 4325, 4488, 5447, 56603, 5744, 5914, 60676, 6423, 652, 7040, 7057, 7291, 860, 871
GO:0045621	positive regulation of lymphocyte differentiation	GOBP	66	0.0432939	1.30873	2.60591e-06	4.44321e-05	up in HPV(+)	101, 146206, 2323, 3071, 3108, 3559, 3574, 3593, 3594, 3600, 3635, 4179, 4602, 50943, 51561, 54440, 55340, 6363, 6776, 6850, 695, 7292, 7535, 8546, 8876, 9308, 939, 942, 972
GO:0000724	double-strand break repair via homologous recombination	GOBP	60	0.0442355	1.31641	2.72887e-06	4.62174e-05	up in HPV(+)	113510, 22909, 23137, 253714, 25788, 348654, 3978, 4796, 56154, 5889, 6118, 63979, 672, 7516, 79677, 79728, 8438, 9985
GO:0000725	recombinational repair	GOBP	60	0.0442355	1.31641	2.72887e-06	4.62174e-05	up in HPV(+)	113510, 22909, 23137, 253714, 25788, 348654, 3978, 4796, 56154, 5889, 6118, 63979, 672, 7516, 79677, 79728, 8438, 9985
GO:0045684	positive regulation of epidermis development	GOBP	24	-0.0803179	0.60705	2.92128e-06	4.93112e-05	up in HPV(-)	10468, 1594, 2810, 3872, 4488, 4831, 50604, 51083, 5467, 6424, 652, 7421
GO:0019222	regulation of metabolic process	GOBP	5201	0.0103874	1.06668	3.13323e-06	5.25386e-05	up in HPV(+)	10009, 100101467, 100128927, 100129654, 10013, 100131390, 100131827, 10018, 100271715, 100289635, 100289678, 100316904, 10036, 10044, 10062, 101, 10103, 10125, 10148, 1017, 10181, 10194, 10224, 10235, 10266, 1027, 1028, 1029, 10309, 10318, 1032, 10333, 10336, 10347, 10385, 10389, 10406, 10437, 10472, 10475, 10481, 10499, 10521, 10522, 10533, 10538, 10550, 10564, 10595, 10600, 10614, 10628, 1063, …
GO:0045060	negative thymic T cell selection	GOBP	10	0.0631388	1.4805	3.1248e-06	5.25386e-05	up in HPV(+)	1236, 1794, 355, 6693, 7535, 916, 940, 972
GO:0006298	mismatch repair	GOBP	25	0.0531586	1.39147	3.3397e-06	5.5816e-05	up in HPV(+)	10535, 10714, 11277, 29072, 2956, 4292, 4436, 4437, 5111, 5378, 6118, 7161, 9156
GO:0035966	response to topologically incorrect protein	GOBP	135	-0.044544	0.758188	3.53668e-06	5.89136e-05	up in HPV(-)	10130, 10525, 10808, 10897, 10954, 11015, 16, 1639, 1649, 1861, 1965, 2137, 23071, 25822, 267, 2673, 27129, 27230, 3300, 3309, 3312, 3316, 3320, 3326, 3329, 3576, 4000, 440275, 468, 51009, 51528, 51726, 55033, 55062, 5526, 55738, 55829, 5610, 578, 595, 6464, 64764, 6734, 7057, 7184, 7873, 8614, 871, 8988, 9114
GO:2000145	regulation of cell motility	GOBP	484	-0.0261935	0.849776	3.57042e-06	5.92806e-05	up in HPV(-)	100, 10016, 1012, 1021, 10344, 10371, 10395, 10630, 11009, 11171, 1277, 1281, 131578, 14, 1460, 147372, 1613, 1809, 182, 183, 1839, 1906, 1909, 1942, 201163, 207, 2149, 2150, 2152, 22800, 2303, 23189, 23213, 23499, 23560, 23768, 26012, 2621, 27, 27286, 2768, 284114, 29108, 29984, 3036, 306, 3091, 3265, 3309, 338879, 347, 3486, 3488, 3491, 3569, 3570, 3576, 3667, 3678, 3690, 3868, 3909, 3910, 3912…
GO:0044057	regulation of system process	GOBP	306	-0.0318789	0.820276	3.71541e-06	6.14865e-05	up in HPV(-)	100, 10052, 10345, 10371, 10398, 10539, 10699, 10810, 11202, 1131, 1264, 132, 133, 136, 1482, 1490, 152, 1613, 1674, 183, 1839, 185, 1906, 207, 2149, 2150, 23630, 2621, 2626, 2697, 27129, 2744, 3269, 3270, 3358, 3569, 3623, 3624, 3625, 3728, 3753, 3768, 4205, 4608, 4624, 4625, 4633, 4634, 4635, 4656, 477, 4842, 51083, 5155, 5350, 5467, 5578, 55800, 5592, 56923, 5743, 57616, 6271, 6324, 6327, 6330…
GO:0060255	regulation of macromolecule metabolic process	GOBP	4397	0.0106136	1.06818	3.73116e-06	6.15459e-05	up in HPV(+)	10009, 100101467, 100128927, 100129654, 10013, 100131390, 100131827, 10018, 100289635, 100289678, 100316904, 10036, 10062, 101, 10103, 10148, 1017, 10181, 10194, 10224, 10266, 1027, 1028, 1029, 10309, 10318, 1032, 10333, 10336, 10347, 10389, 10406, 10437, 10472, 10475, 10481, 10499, 10521, 10522, 10533, 10538, 10550, 10595, 10600, 10614, 10628, 1063, 10636, 10656, 10657, 10745, 10768, 10781, 1078…
GO:0016477	cell migration	GOBP	904	-0.0198108	0.884161	3.88058e-06	6.3659e-05	up in HPV(-)	100, 1000, 10016, 100506013, 10082, 1012, 10344, 10371, 10395, 10487, 10512, 10630, 1072, 10787, 11009, 11023, 11171, 1277, 1278, 1281, 1289, 131578, 14, 140885, 1460, 1462, 1464, 147372, 147495, 1490, 170302, 1761, 1809, 182, 183, 1839, 185, 1861, 1906, 1909, 1942, 1947, 1948, 196527, 201163, 2018, 2028, 2043, 2049, 2050, 207, 2149, 2150, 2152, 2191, 2258, 22800, 22801, 2303, 23080, 23189, 23213…
GO:0050819	negative regulation of coagulation	GOBP	33	-0.0723662	0.637802	3.88441e-06	6.3659e-05	up in HPV(-)	10544, 1906, 2191, 222537, 302, 308, 3848, 5054, 5154, 5155, 5270, 5328, 5624, 7057, 710
GO:0006959	humoral immune response	GOBP	103	0.038227	1.26816	3.89916e-06	6.36947e-05	up in HPV(+)	10148, 1191, 1235, 1236, 1378, 1380, 1880, 2208, 2219, 2302, 29760, 3119, 3123, 3127, 3458, 3512, 3574, 4049, 4068, 4179, 4853, 5079, 5133, 51441, 5199, 5450, 55340, 5777, 596, 602, 6480, 712, 7124, 713, 714, 718, 727, 730, 733, 820, 8970, 9156, 9308, 931, 940, 9450, 951
GO:0006974	cellular response to DNA damage stimulus	GOBP	648	0.0207768	1.13783	4.0069e-06	6.50958e-05	up in HPV(+)	10018, 10036, 10075, 1017, 1027, 1029, 10309, 1032, 10535, 10538, 10600, 10714, 10721, 11073, 11186, 112399, 11277, 11284, 113510, 1191, 121642, 131870, 132671, 133746, 140733, 142, 143, 144455, 144715, 1493, 157570, 1643, 1763, 1859, 1869, 201299, 201973, 204851, 2139, 2140, 2175, 2176, 2177, 2178, 2187, 2237, 22909, 23137, 23409, 23411, 245711, 253714, 25788, 25896, 26122, 26471, 27033, 27113, …
GO:0044267	cellular protein metabolic process	GOBP	3427	-0.0115412	0.930788	4.01643e-06	6.50958e-05	up in HPV(-)	10049, 10056, 10071, 10090, 10102, 10105, 10128, 10130, 10188, 10196, 10197, 1021, 10213, 1022, 10290, 10294, 10295, 10299, 10324, 10381, 10395, 10411, 10440, 10452, 10467, 10471, 10477, 10480, 10484, 10489, 10494, 10525, 10573, 10574, 10575, 10576, 10605, 10617, 10642, 10644, 10651, 107, 1072, 1075, 10765, 10769, 10783, 10808, 10884, 10897, 10920, 10922, 10952, 10954, 10956, 10966, 10980, 11009,…
GO:0048585	negative regulation of response to stimulus	GOBP	913	-0.0196929	0.884809	4.0235e-06	6.50958e-05	up in HPV(-)	100, 1000, 10016, 10105, 10197, 1021, 10252, 10272, 10371, 10395, 10413, 10468, 10617, 10625, 11072, 11171, 11202, 112464, 11331, 115265, 1280, 1281, 133, 135228, 1437, 144165, 145258, 147040, 147495, 147906, 1482, 150290, 1604, 1649, 1745, 1746, 183, 1845, 1848, 1852, 1950, 197131, 201163, 2017, 2043, 207, 2150, 2200, 2201, 22821, 22943, 2305, 2308, 23089, 23189, 23213, 23286, 23365, 23532, 2362…
GO:0048869	cellular developmental process	GOBP	2908	-0.0121967	0.927004	4.07188e-06	6.55695e-05	up in HPV(-)	100, 1000, 1001, 10052, 10059, 1009, 10096, 10100, 10109, 1013, 10202, 1021, 10211, 10234, 10272, 10290, 10319, 10324, 10345, 10371, 10381, 103910, 10395, 10398, 1041, 10411, 10413, 10417, 10435, 10458, 10468, 10487, 10494, 10501, 10505, 1051, 10512, 10514, 1053, 10553, 10570, 10579, 10602, 10627, 10630, 10634, 1066, 107, 1072, 1073, 10810, 10913, 10938, 10979, 10981, 11007, 11023, 11075, 11155, …
GO:0051094	positive regulation of developmental process	GOBP	713	-0.0219544	0.872461	4.07867e-06	6.55695e-05	up in HPV(-)	100, 1000, 10016, 10059, 10096, 10109, 1013, 10371, 10411, 10468, 10494, 1051, 10655, 10938, 11197, 116039, 1192, 1277, 133, 1437, 147040, 147372, 1482, 1490, 150572, 152, 1523, 1594, 169200, 1749, 1761, 1789, 182, 183, 185, 1906, 1909, 1948, 2043, 2048, 2049, 207, 2119, 2152, 2201, 22938, 22943, 2303, 23051, 23242, 2335, 23363, 23529, 252995, 2547, 25805, 25819, 25937, 2621, 2624, 2626, 26508, 2…
GO:0001704	formation of primary germ layer	GOBP	105	-0.0487093	0.738814	4.17167e-06	6.66415e-05	up in HPV(-)	10787, 1284, 1289, 1290, 1291, 1295, 1301, 1848, 2132, 22943, 2303, 23135, 2335, 2626, 3170, 3207, 3624, 3678, 3690, 3693, 3909, 3912, 4313, 4323, 4771, 55614, 6423, 652, 6615, 6722, 6886, 7296, 7473, 79971, 8091, 8312, 8646, 90, 9241
GO:1901861	regulation of muscle tissue development	GOBP	97	-0.0501618	0.732175	4.17017e-06	6.66415e-05	up in HPV(-)	10324, 144165, 1482, 150572, 1649, 1948, 22943, 2626, 26287, 2697, 27231, 2817, 3084, 3399, 3486, 463, 4656, 56603, 57158, 5950, 60485, 650, 652, 6665, 6899, 6909, 6926, 7040, 7048, 7291, 7472, 8531, 859, 90, 9099, 91653, 9241, 9472
GO:0048638	regulation of developmental growth	GOBP	113	-0.0473617	0.745027	4.23732e-06	6.74773e-05	up in HPV(-)	10371, 10505, 1482, 150465, 1848, 203447, 2258, 2335, 2626, 2697, 3084, 3984, 4131, 4137, 4624, 4803, 5048, 51083, 51330, 5447, 5523, 55558, 57142, 57611, 5950, 60485, 6422, 6423, 652, 6665, 6909, 7048, 7472, 7473, 7474, 81565, 85407, 859, 8829, 8851, 91584, 9241, 9472, 9625
GO:0060571	morphogenesis of an epithelial fold	GOBP	23	-0.0803975	0.606749	4.42803e-06	7.02933e-05	up in HPV(-)	1072, 23213, 25928, 2736, 3091, 54815, 5744, 58495, 652, 7472, 7474, 7798, 9241
GO:0055024	regulation of cardiac muscle tissue development	GOBP	37	-0.0695352	0.649122	4.46733e-06	7.06955e-05	up in HPV(-)	144165, 1482, 1948, 22943, 2626, 2697, 3084, 57158, 5950, 60485, 650, 652, 6909, 7048, 7472, 859, 9241, 9472
GO:0016202	regulation of striated muscle tissue development	GOBP	96	-0.0502131	0.731942	4.51756e-06	7.12678e-05	up in HPV(-)	10324, 144165, 1482, 150572, 1649, 1948, 22943, 2626, 26287, 2697, 27231, 2817, 3084, 3399, 3486, 463, 4656, 56603, 57158, 5950, 60485, 650, 652, 6665, 6899, 6909, 6926, 7040, 7048, 7291, 7472, 8531, 859, 90, 9099, 91653, 9241, 9472
GO:0051149	positive regulation of muscle cell differentiation	GOBP	54	-0.0613992	0.682787	4.67624e-06	7.35418e-05	up in HPV(-)	1000, 1013, 150572, 1948, 3084, 341676, 3486, 4205, 4618, 463, 4656, 56603, 57616, 6300, 652, 6899, 7040, 7067, 84193, 859, 9043, 91653, 9472, 9643
GO:0097205	renal filtration	GOBP	17	-0.0874153	0.580856	5.08731e-06	7.9759e-05	up in HPV(-)	1909, 2149, 2150, 23213, 2621, 2697, 4162, 5155, 55959
GO:0010833	telomere maintenance via telomere lengthening	GOBP	39	0.0479726	1.34734	5.23364e-06	8.17998e-05	up in HPV(+)	10714, 1763, 2237, 23649, 3978, 5111, 5422, 5424, 5426, 5427, 5983, 5984, 5985, 6118, 8658
GO:0030512	negative regulation of transforming growth factor beta receptor signaling pathway	GOBP	64	-0.057724	0.698561	5.26508e-06	8.20381e-05	up in HPV(-)	11171, 135228, 2200, 2201, 23089, 23625, 25805, 2734, 283149, 3309, 4052, 50515, 54829, 5499, 5654, 56937, 57154, 58533, 64750, 6498, 7040, 7041, 7046, 7048, 7080, 7316, 858, 94031
GO:0061035	regulation of cartilage development	GOBP	50	-0.0627288	0.677168	5.34085e-06	8.29634e-05	up in HPV(-)	11173, 1490, 2734, 2736, 3207, 3237, 3491, 4017, 5447, 5744, 5914, 5970, 649, 650, 652, 6591, 6660, 7040, 7046, 7474, 7481, 81792, 860, 9241
GO:0016055	Wnt signaling pathway	GOBP	305	-0.0314427	0.822502	5.37935e-06	8.33059e-05	up in HPV(-)	1000, 1001, 10413, 10979, 11197, 1277, 144165, 145258, 1453, 1459, 1460, 147495, 147906, 1482, 1613, 1649, 1749, 1896, 2010, 22943, 2300, 23184, 23189, 23213, 23399, 23499, 2535, 25805, 25806, 25928, 25937, 25987, 2626, 26524, 27122, 27130, 2719, 2735, 283149, 2869, 29117, 3090, 343637, 3728, 388630, 4163, 4188, 4609, 4624, 50964, 51339, 51384, 54475, 54949, 5523, 55959, 5754, 59352, 595, 6299, 6…
GO:0010631	epithelial cell migration	GOBP	162	-0.0407798	0.776134	5.5543e-06	8.54923e-05	up in HPV(-)	10016, 100506013, 1012, 10371, 11171, 14, 1460, 147372, 183, 1839, 1906, 1942, 1948, 2050, 207, 2191, 2303, 23499, 27286, 306, 3091, 3164, 340719, 3690, 4017, 4163, 4233, 4627, 5155, 5216, 5217, 5467, 55612, 5578, 5743, 5801, 6273, 652, 6672, 6678, 6722, 7040, 7046, 7048, 7057, 7424, 7474, 7857, 8828, 8829, 9270, 949, 9564
GO:0090132	epithelium migration	GOBP	162	-0.0407798	0.776134	5.5543e-06	8.54923e-05	up in HPV(-)	10016, 100506013, 1012, 10371, 11171, 14, 1460, 147372, 183, 1839, 1906, 1942, 1948, 2050, 207, 2191, 2303, 23499, 27286, 306, 3091, 3164, 340719, 3690, 4017, 4163, 4233, 4627, 5155, 5216, 5217, 5467, 55612, 5578, 5743, 5801, 6273, 652, 6672, 6678, 6722, 7040, 7046, 7048, 7057, 7424, 7474, 7857, 8828, 8829, 9270, 949, 9564
GO:0002576	platelet degranulation	GOBP	71	-0.0555632	0.708005	5.58101e-06	8.56431e-05	up in HPV(-)	10487, 1072, 1950, 22927, 2316, 2335, 2621, 3309, 3481, 351, 3690, 3920, 5054, 5154, 5155, 5216, 6678, 7040, 7057, 7076, 710, 7273, 7277, 7414, 7424, 813, 87, 88, 948
GO:0048232	male gamete generation	GOBP	298	0.0272328	1.18441	5.66375e-06	8.66502e-05	up in HPV(+)	10018, 10149, 10406, 10420, 10461, 10656, 10693, 1080, 10863, 10919, 10983, 11022, 11063, 11113, 11144, 122402, 124626, 1268, 143689, 148327, 150365, 1512, 162655, 163589, 166378, 1788, 1869, 2302, 23411, 23598, 259266, 2879, 28981, 29118, 29127, 30812, 3148, 347732, 353189, 3622, 3633, 3815, 400629, 4292, 4485, 4948, 5050, 50511, 5079, 51087, 51174, 51314, 51361, 51460, 54457, 54558, 55124, 5534…
GO:0051155	positive regulation of striated muscle cell differentiation	GOBP	24	-0.0787794	0.612882	5.79771e-06	8.84325e-05	up in HPV(-)	150572, 1948, 3084, 341676, 4656, 56603, 652, 6899, 7067, 859, 9472, 9643
GO:0030888	regulation of B cell proliferation	GOBP	47	0.0458735	1.32988	5.97576e-06	9.08746e-05	up in HPV(+)	1029, 10673, 11314, 115650, 1493, 151888, 1880, 22806, 23495, 3071, 3574, 3635, 4067, 4332, 51237, 54440, 596, 7293, 836, 84433, 972
GO:0016568	chromatin modification	GOBP	486	0.0227849	1.15212	6.02445e-06	9.13408e-05	up in HPV(+)	10013, 10075, 1017, 1029, 10499, 10600, 10847, 10865, 10919, 10943, 1105, 11240, 112869, 114803, 117143, 148479, 1643, 1786, 1788, 196528, 2005, 2099, 2139, 2140, 2145, 2146, 22823, 23030, 23081, 23133, 23338, 23411, 23421, 23466, 23492, 23512, 25862, 26013, 26122, 26147, 27005, 27154, 29072, 29128, 3070, 30827, 3141, 3169, 3275, 3621, 3622, 3662, 3717, 387103, 408, 4504, 4582, 4602, 4678, 473, 5…
GO:0030111	regulation of Wnt signaling pathway	GOBP	196	-0.0375951	0.791648	6.22828e-06	9.41492e-05	up in HPV(-)	1000, 10413, 1277, 144165, 145258, 1453, 147495, 147906, 1482, 1613, 1649, 1749, 1896, 2010, 22943, 2300, 23189, 23213, 23399, 23499, 25805, 25928, 25937, 25987, 26524, 27122, 27130, 2719, 2735, 3090, 3728, 388630, 4163, 4188, 50964, 51339, 54475, 54949, 5523, 55959, 59352, 595, 6299, 6422, 6423, 6424, 64359, 650, 6591, 65981, 6788, 7088, 7472, 7474, 7476, 7481, 79971, 80114, 81029, 8312, 84133, …
GO:0040012	regulation of locomotion	GOBP	529	-0.0245855	0.858311	6.2553e-06	9.42762e-05	up in HPV(-)	100, 10016, 1012, 1021, 10344, 10371, 10395, 10410, 10630, 11009, 11171, 1277, 1281, 131578, 14, 1460, 147372, 1613, 1809, 182, 183, 1839, 1906, 1909, 1942, 1948, 201163, 207, 2149, 2150, 2152, 222537, 22800, 2303, 23189, 23213, 23499, 23560, 23768, 26012, 2621, 27, 27286, 2768, 284114, 29108, 29984, 3036, 306, 3091, 3265, 3309, 3352, 338879, 347, 3486, 3488, 3491, 3569, 3570, 3576, 3667, 3678, 3…
GO:0000280	nuclear division	GOBP	452	0.0233476	1.15615	6.41725e-06	9.64301e-05	up in HPV(+)	10051, 1017, 10270, 10274, 10388, 10403, 10592, 1060, 10600, 1063, 10636, 10734, 10907, 10919, 11004, 11022, 11040, 11078, 11113, 11130, 11144, 115106, 121441, 122402, 143689, 146909, 147841, 148479, 150365, 151246, 151648, 152185, 157313, 162655, 2175, 2177, 220134, 2261, 23047, 23113, 23122, 23126, 23137, 23244, 23331, 23354, 23383, 23421, 24149, 245711, 256126, 25788, 259266, 25936, 25970, 260…
GO:0022402	cell cycle process	GOBP	1055	0.0168458	1.11037	6.51071e-06	9.7545e-05	up in HPV(+)	10051, 10112, 1017, 1027, 10270, 10274, 1028, 1029, 1032, 10388, 10403, 10426, 10592, 10595, 1060, 10600, 1063, 10636, 10657, 10714, 10733, 10734, 10869, 10907, 10919, 11004, 11040, 11078, 11113, 11130, 11144, 11180, 11186, 11190, 114799, 115106, 121441, 127933, 128239, 131870, 132660, 133746, 134353, 144455, 144715, 146909, 147841, 148479, 150365, 151246, 151648, 152185, 153241, 157313, 163786, …
GO:0048754	branching morphogenesis of an epithelial tube	GOBP	152	-0.0415492	0.772431	6.58151e-06	9.8315e-05	up in HPV(-)	11331, 1282, 170690, 183, 1906, 1909, 1950, 2118, 2119, 2303, 2637, 2668, 2719, 2736, 3170, 3207, 3217, 3237, 3265, 374, 3845, 4233, 4323, 4488, 4609, 4776, 5058, 5499, 578, 5829, 6299, 6423, 64399, 650, 652, 6608, 6722, 6926, 7022, 7040, 7048, 7080, 7421, 7472, 7474, 7475, 7477, 859, 8829, 90, 9241, 960
GO:0030030	cell projection organization	GOBP	983	-0.0186352	0.890644	6.61825e-06	9.8573e-05	up in HPV(-)	1009, 10096, 10100, 10109, 1012, 10211, 10324, 10371, 10381, 103910, 10398, 10417, 10435, 10458, 10487, 10494, 10505, 10512, 10570, 107, 1072, 1073, 10787, 10810, 10938, 11023, 11075, 11202, 121512, 123016, 1280, 1281, 1282, 1284, 1287, 1289, 1290, 1291, 1292, 129880, 133, 1400, 1459, 1460, 148738, 150465, 1523, 1627, 170302, 1716, 1749, 1770, 1809, 1861, 1874, 1942, 1944, 1946, 1947, 1948, 1949,…
GO:0007283	spermatogenesis	GOBP	297	0.0269898	1.18262	7.41848e-06	0.000110168	up in HPV(+)	10018, 10149, 10406, 10420, 10461, 10656, 10693, 1080, 10863, 10919, 10983, 11022, 11063, 11113, 11144, 122402, 124626, 1268, 143689, 148327, 150365, 1512, 162655, 163589, 166378, 1788, 1869, 2302, 23411, 23598, 259266, 2879, 28981, 29118, 29127, 30812, 3148, 347732, 353189, 3622, 3633, 3815, 400629, 4292, 4485, 4948, 5050, 50511, 5079, 51087, 51174, 51314, 51361, 51460, 54457, 54558, 55124, 5534…
GO:0003094	glomerular filtration	GOBP	16	-0.0879265	0.579014	7.63024e-06	0.000112652	up in HPV(-)	1909, 2149, 2150, 23213, 2621, 2697, 4162, 5155, 55959
GO:0051234	establishment of localization	GOBP	3484	-0.0111366	0.933131	7.62311e-06	0.000112652	up in HPV(-)	100, 1001, 10016, 10043, 10052, 10058, 10059, 10060, 10061, 10089, 10096, 10105, 10109, 1012, 10121, 10128, 10130, 10133, 10134, 10165, 10175, 10188, 10204, 10211, 10226, 10227, 10237, 10244, 10345, 10411, 10440, 10452, 10458, 10476, 10484, 10487, 10490, 10514, 10527, 1053, 10540, 10553, 10597, 10627, 10632, 10642, 10644, 10650, 10651, 10652, 10681, 10699, 107, 1072, 10749, 10758, 10787, 10809, 1…
GO:0045665	negative regulation of neuron differentiation	GOBP	43	0.0465003	1.33507	7.65935e-06	0.000112753	up in HPV(+)	22882, 259266, 30012, 30812, 3280, 3398, 3670, 4211, 5080, 5087, 55755, 6657, 6900, 7161, 7267, 79191
GO:0043367	CD4-positive, alpha-beta T cell differentiation	GOBP	45	0.0459905	1.33084	7.90124e-06	0.000115976	up in HPV(+)	10538, 159296, 2529, 3071, 3593, 3594, 3662, 3718, 4602, 5075, 50943, 51561, 54440, 55340, 5734, 5971, 602, 6097, 6304, 6363, 64218, 7292, 9308, 942
GO:0044848	biological phase	GOBP	25	-0.0769499	0.61989	8.47646e-06	0.00012406	up in HPV(-)	1001, 1515, 207, 4488, 51083, 5467, 5743, 6422, 6424, 668, 7080
GO:0030514	negative regulation of BMP signaling pathway	GOBP	31	-0.0720441	0.63908	8.5442e-06	0.000124691	up in HPV(-)	10272, 2200, 22943, 25928, 28996, 50964, 5654, 57154, 6422, 6423, 7474, 857, 8646, 9241, 94031
GO:0090130	tissue migration	GOBP	166	-0.0396863	0.781426	8.62591e-06	0.000125522	up in HPV(-)	10016, 100506013, 1012, 10371, 10787, 11171, 14, 1460, 147372, 183, 1839, 1906, 1942, 1948, 2050, 207, 2191, 2303, 23499, 27286, 306, 3091, 3164, 340719, 3690, 4017, 4163, 4233, 4627, 5155, 5216, 5217, 5467, 55612, 5578, 5743, 5801, 6273, 652, 6672, 6678, 6722, 7040, 7046, 7048, 7057, 7424, 7474, 7857, 8828, 8829, 9270, 949, 9564
GO:0040008	regulation of growth	GOBP	492	-0.0249992	0.856107	8.78275e-06	0.000127438	up in HPV(-)	10071, 1012, 10371, 10413, 10477, 10505, 10634, 11007, 1410, 147040, 147906, 1482, 1490, 150465, 151242, 152404, 1594, 170302, 1735, 183, 1839, 1848, 185, 201163, 203447, 207, 2137, 2182, 2258, 2273, 2303, 2305, 23286, 2335, 23532, 23677, 2596, 26153, 2621, 2626, 26524, 2697, 27000, 2719, 27230, 27344, 27429, 2778, 2786, 2810, 28985, 29842, 29948, 29967, 3084, 3091, 323, 3297, 3300, 3485, 3486, 3…
GO:0050793	regulation of developmental process	GOBP	1512	-0.0152268	0.909711	9.02307e-06	0.000130551	up in HPV(-)	100, 1000, 1001, 10016, 10059, 10096, 10109, 1013, 1021, 10234, 10272, 10324, 10371, 103910, 10395, 10411, 10413, 10435, 10458, 10468, 10493, 10494, 10505, 1051, 10553, 10602, 10627, 10630, 10634, 10655, 1072, 1073, 10783, 10810, 10938, 10979, 11007, 11023, 11075, 11171, 11173, 11197, 11202, 11331, 114299, 114793, 116039, 117581, 118987, 1192, 121512, 122953, 1277, 1281, 1284, 1289, 1290, 133, 14…
GO:0016486	peptide hormone processing	GOBP	27	-0.0749631	0.627591	9.31675e-06	0.000134416	up in HPV(-)	10699, 183, 2028, 27344, 290, 4803, 5045, 5122, 5125, 5126, 9159, 9718
GO:0010831	positive regulation of myotube differentiation	GOBP	10	-0.0994913	0.53886	1.00064e-05	0.000143956	up in HPV(-)	150572, 4656, 56603, 6899, 7067, 859
GO:0014032	neural crest cell development	GOBP	46	-0.0630749	0.675714	1.04512e-05	0.000149928	up in HPV(-)	10371, 10512, 1072, 182, 1906, 1909, 1947, 2303, 2637, 2668, 3084, 3091, 5077, 58495, 6591, 6608, 6664, 6899, 7291, 8828, 8829, 90
GO:0002703	regulation of leukocyte mediated immunity	GOBP	106	0.036759	1.25664	1.0848e-05	0.000155182	up in HPV(+)	10859, 11314, 117157, 1378, 2206, 2207, 2208, 2209, 2268, 2302, 259197, 30009, 3458, 3593, 3594, 3718, 3902, 4049, 4067, 4068, 409, 4843, 50943, 51561, 54440, 55340, 5777, 6693, 6776, 6850, 695, 7124, 718, 7186, 7292, 729230, 84106, 8741, 940, 9466
GO:0044765	single-organism transport	GOBP	2855	-0.0116803	0.929983	1.14418e-05	0.000162756	up in HPV(-)	100, 1001, 10043, 10052, 10058, 10059, 10060, 10089, 10096, 10105, 10109, 10128, 10130, 10133, 10134, 10165, 10204, 10227, 10237, 10244, 10345, 10411, 10440, 10452, 10458, 10476, 10484, 10487, 10490, 10527, 1053, 10540, 10597, 10627, 10632, 10650, 10651, 10652, 10681, 10699, 107, 1072, 10749, 10758, 10787, 10809, 10913, 10938, 10952, 10953, 10956, 10959, 10971, 10972, 10981, 10999, 11031, 11046, …
GO:0045087	innate immune response	GOBP	725	0.0190261	1.12551	1.14367e-05	0.000162756	up in HPV(+)	100049587, 10062, 101, 10125, 10163, 10219, 1027, 10318, 10326, 10333, 10437, 10462, 10537, 10628, 10859, 10906, 11074, 111, 11151, 112, 11277, 117157, 118788, 1191, 1235, 127544, 1378, 1380, 140564, 1435, 1436, 146433, 1520, 152831, 1536, 163351, 164668, 1690, 192670, 199, 200315, 200316, 2065, 2206, 2207, 2209, 2210, 2219, 2247, 2261, 2268, 23087, 23098, 23239, 2475, 257397, 259197, 25939, 2604…
GO:0001935	endothelial cell proliferation	GOBP	88	-0.0500886	0.732508	1.16312e-05	0.000164988	up in HPV(-)	10016, 1012, 10344, 207, 2152, 23213, 3091, 3164, 3690, 383, 4017, 4323, 51162, 5155, 5365, 5578, 57521, 650, 652, 6678, 7046, 7057, 7472, 7474, 7857, 79400, 857, 858, 8828, 8829, 9270, 949
GO:0048634	regulation of muscle organ development	GOBP	98	-0.0481114	0.741564	1.17206e-05	0.00016579	up in HPV(-)	10324, 144165, 1482, 150572, 1649, 1948, 22943, 2626, 26287, 2697, 27231, 2817, 3084, 3399, 3486, 3569, 463, 4656, 56603, 57158, 5950, 60485, 650, 652, 6665, 6899, 6909, 6926, 7040, 7048, 7291, 7472, 8531, 859, 90, 9099, 91653, 9241, 9472
GO:0048706	embryonic skeletal system development	GOBP	114	-0.0453879	0.754222	1.2007e-05	0.000169369	up in HPV(-)	10655, 116039, 1277, 1280, 1301, 145258, 1745, 1746, 2131, 2303, 23213, 2778, 3198, 3207, 3215, 3216, 3217, 3218, 3227, 3235, 3236, 3237, 3340, 4188, 4323, 4325, 50515, 5081, 5125, 51450, 55959, 5950, 60529, 652, 6608, 6664, 6899, 7046, 7048, 7291, 7474, 7481, 8312, 860, 9241, 9775
GO:0006508	proteolysis	GOBP	1125	-0.0170438	0.899496	1.23148e-05	0.000173228	up in HPV(-)	10016, 10049, 10072, 10134, 10197, 10213, 10395, 10531, 10617, 10699, 1075, 10769, 10952, 10956, 11009, 11012, 11047, 11096, 11098, 11173, 11174, 11202, 116988, 12, 124739, 128488, 135228, 140766, 1410, 144165, 1453, 1471, 1474, 147968, 1490, 150684, 1513, 1514, 1515, 151516, 152503, 154214, 1611, 1649, 165, 170690, 1738, 175, 176, 183, 1861, 1950, 197131, 2028, 207, 2149, 2152, 2191, 220213, 230…
GO:0007140	male meiosis	GOBP	26	0.0510233	1.37313	1.35561e-05	0.000190161	up in HPV(+)	10388, 11022, 11040, 11144, 122402, 150365, 2175, 245711, 3622, 4292, 50511, 56154, 5889, 9985
GO:0010569	regulation of double-strand break repair via homologous recombination	GOBP	12	0.0591852	1.44457	1.3782e-05	0.000192796	up in HPV(+)	56154, 6118, 63979
GO:0017015	regulation of transforming growth factor beta receptor signaling pathway	GOBP	89	-0.0494401	0.735466	1.46333e-05	0.000204141	up in HPV(-)	11171, 135228, 201163, 2200, 2201, 22938, 23089, 23625, 25805, 2734, 283149, 28996, 3309, 4052, 50515, 54829, 5499, 5654, 56937, 57154, 58533, 64750, 6498, 6664, 7040, 7041, 7046, 7048, 7057, 7080, 7316, 8312, 858, 859, 94031
GO:0048870	cell motility	GOBP	957	-0.0181243	0.893477	1.50163e-05	0.000208336	up in HPV(-)	100, 1000, 10016, 100506013, 10082, 1012, 1021, 10344, 10371, 10395, 10487, 10512, 10630, 1072, 10787, 11009, 11023, 11171, 1277, 1278, 1281, 1289, 131578, 14, 140885, 1460, 1462, 1464, 147372, 147495, 1490, 1613, 170302, 1761, 1809, 182, 183, 1839, 185, 1861, 1906, 1909, 1942, 1947, 1948, 196527, 201163, 2018, 2028, 2043, 2049, 2050, 207, 2149, 2150, 2152, 2191, 2258, 22800, 22801, 2303, 23080, …
GO:0051674	localization of cell	GOBP	957	-0.0181243	0.893477	1.50163e-05	0.000208336	up in HPV(-)	100, 1000, 10016, 100506013, 10082, 1012, 1021, 10344, 10371, 10395, 10487, 10512, 10630, 1072, 10787, 11009, 11023, 11171, 1277, 1278, 1281, 1289, 131578, 14, 140885, 1460, 1462, 1464, 147372, 147495, 1490, 1613, 170302, 1761, 1809, 182, 183, 1839, 185, 1861, 1906, 1909, 1942, 1947, 1948, 196527, 201163, 2018, 2028, 2043, 2049, 2050, 207, 2149, 2150, 2152, 2191, 2258, 22800, 22801, 2303, 23080, …
GO:0007179	transforming growth factor beta receptor signaling pathway	GOBP	172	-0.0382051	0.788652	1.51841e-05	0.000209713	up in HPV(-)	10979, 11171, 1278, 1281, 135228, 1874, 201163, 2200, 2201, 2280, 22938, 23089, 23625, 25805, 25937, 2734, 283149, 28996, 3309, 3693, 4052, 4609, 4738, 5045, 50515, 5054, 5154, 5155, 5159, 54829, 5499, 5654, 56937, 57154, 5796, 5829, 58533, 64750, 6498, 6664, 7040, 7041, 7046, 7048, 7050, 7057, 7071, 7080, 7316, 7791, 8312, 858, 859, 867, 90, 94031
GO:0044319	wound healing, spreading of cells	GOBP	13	-0.0913554	0.566806	1.52398e-05	0.000209713	up in HPV(-)	1289, 1839, 1861, 3491, 3678, 4488, 7476
GO:0090505	epiboly involved in wound healing	GOBP	13	-0.0913554	0.566806	1.52398e-05	0.000209713	up in HPV(-)	1289, 1839, 1861, 3491, 3678, 4488, 7476
GO:0043616	keratinocyte proliferation	GOBP	29	-0.0721559	0.638636	1.54883e-05	0.000212555	up in HPV(-)	1001, 1012, 10413, 10468, 11202, 1515, 1948, 2069, 2810, 51384, 5467, 55612, 5796, 58495, 6591, 7421
GO:0003231	cardiac ventricle development	GOBP	87	-0.0497272	0.734155	1.56446e-05	0.000213543	up in HPV(-)	10512, 129446, 1301, 1482, 161882, 182, 2280, 2303, 2535, 2626, 26508, 3084, 3091, 3209, 3491, 4624, 4625, 4633, 4634, 57167, 57493, 60485, 6299, 6331, 6423, 6604, 6664, 6926, 7134, 7135, 7137, 7139, 7168, 7474, 7481, 7798, 9321
GO:0045061	thymic T cell selection	GOBP	19	0.0541219	1.39982	1.56345e-05	0.000213543	up in HPV(+)	1236, 1794, 3108, 355, 6693, 7535, 84433, 915, 916, 940, 972
GO:0007369	gastrulation	GOBP	150	-0.040275	0.778572	1.60704e-05	0.000218765	up in HPV(-)	100506013, 10787, 116039, 1284, 1289, 1290, 1291, 1295, 1301, 145258, 1738, 1848, 2131, 2132, 22943, 2303, 23135, 2335, 2626, 3170, 3207, 3624, 3678, 3690, 3693, 3728, 3909, 3912, 4313, 4323, 4771, 51339, 55614, 60626, 6423, 652, 6615, 6722, 6886, 7048, 7050, 7296, 7358, 7473, 7474, 79971, 8091, 8312, 8646, 90, 91663, 9241
GO:0030334	regulation of cell migration	GOBP	460	-0.0249999	0.856103	1.64974e-05	0.000223975	up in HPV(-)	100, 10016, 1012, 10344, 10371, 10395, 10630, 11009, 11171, 1277, 1281, 131578, 14, 1460, 147372, 1809, 182, 183, 1839, 1906, 1909, 1942, 201163, 207, 2149, 2150, 2152, 22800, 2303, 23189, 23213, 23499, 23560, 23768, 26012, 2621, 27286, 2768, 284114, 29108, 29984, 3036, 306, 3091, 3265, 3309, 347, 3486, 3488, 3491, 3569, 3570, 3576, 3667, 3678, 3690, 3868, 3909, 3910, 3912, 4000, 4163, 4233, 4314…
GO:0002026	regulation of the force of heart contraction	GOBP	25	-0.0753013	0.626273	1.68685e-05	0.000228401	up in HPV(-)	10539, 133, 4624, 4625, 4634, 4635, 477, 4842, 5350, 5578, 8048, 817, 857
GO:0009953	dorsal/ventral pattern formation	GOBP	89	-0.0491222	0.73692	1.72321e-05	0.000232702	up in HPV(-)	145258, 1649, 1848, 1906, 2019, 221833, 25806, 2735, 2736, 3110, 3170, 3207, 3237, 4010, 4188, 5081, 50964, 58495, 58524, 6422, 64399, 652, 658, 6608, 6656, 7050, 7080, 7473, 7476, 79659, 8022, 8312, 8646, 90, 9241
GO:0060348	bone development	GOBP	127	-0.0428582	0.766173	1.75414e-05	0.000236249	up in HPV(-)	10234, 116039, 1277, 1280, 1300, 1305, 1311, 1749, 196527, 23213, 249, 2734, 2778, 3207, 3237, 3292, 3636, 4322, 4323, 4325, 4488, 4882, 51119, 5358, 5447, 5479, 55959, 56603, 5744, 5914, 60676, 64175, 6423, 650, 652, 6678, 7040, 7057, 7291, 79001, 860, 871
GO:0042303	molting cycle	GOBP	94	-0.0480072	0.742045	1.8368e-05	0.000245828	up in HPV(-)	1001, 10468, 10913, 147495, 1515, 16, 162514, 1896, 196264, 207, 22943, 25928, 2778, 3229, 3488, 3624, 3861, 3868, 3872, 4488, 51083, 5154, 5467, 5743, 5970, 60485, 60529, 6608, 6615, 6635, 7022, 7053, 80326
GO:0042633	hair cycle	GOBP	94	-0.0480072	0.742045	1.8368e-05	0.000245828	up in HPV(-)	1001, 10468, 10913, 147495, 1515, 16, 162514, 1896, 196264, 207, 22943, 25928, 2778, 3229, 3488, 3624, 3861, 3868, 3872, 4488, 51083, 5154, 5467, 5743, 5970, 60485, 60529, 6608, 6615, 6635, 7022, 7053, 80326
GO:0043542	endothelial cell migration	GOBP	115	-0.0444561	0.758603	1.83983e-05	0.000245828	up in HPV(-)	10016, 1012, 14, 1460, 147372, 183, 1906, 1942, 1948, 2050, 207, 2191, 2303, 27286, 306, 3164, 3690, 4017, 4233, 4627, 5155, 5578, 5743, 6273, 652, 6672, 6678, 6722, 7040, 7046, 7057, 7424, 7474, 7857, 8828, 8829, 9270, 949, 9564
GO:0046634	regulation of alpha-beta T cell activation	GOBP	54	0.0430401	1.30666	1.85739e-05	0.000247521	up in HPV(+)	10148, 10859, 11314, 151888, 3071, 3120, 3593, 3594, 3659, 3662, 3718, 4602, 50943, 51561, 54440, 55340, 6363, 6850, 7292, 729230, 7535, 8546, 8764, 916, 9308, 940, 942
GO:0045214	sarcomere organization	GOBP	29	-0.0717069	0.64042	1.8679e-05	0.000248268	up in HPV(-)	1073, 11155, 1482, 165904, 1906, 27063, 4621, 4624, 6722, 71, 7139, 7168, 7273, 84665, 8557, 859
GO:0006323	DNA packaging	GOBP	108	0.0358659	1.24969	1.94016e-05	0.000257198	up in HPV(+)	10036, 10051, 10270, 1029, 10592, 10595, 148479, 1677, 23421, 29781, 3070, 3148, 387103, 4171, 4676, 4678, 50511, 50809, 51203, 54892, 55723, 55870, 57082, 5928, 5931, 64061, 64105, 64946, 7153, 7157, 7175, 79172, 79682, 8208, 83983, 8970, 983
GO:0001667	ameboidal cell migration	GOBP	229	-0.0335528	0.811787	1.95499e-05	0.000258487	up in HPV(-)	10016, 100506013, 1012, 10371, 10487, 10512, 1072, 10787, 11171, 14, 1460, 147372, 183, 1839, 1906, 1942, 1947, 1948, 2050, 207, 2191, 2303, 23499, 2637, 2668, 27286, 2768, 3036, 306, 3091, 3164, 340719, 3690, 4017, 4163, 4233, 4627, 5048, 5077, 5155, 5216, 5217, 5467, 55612, 5578, 5743, 5801, 58495, 60626, 6273, 652, 6608, 6672, 6678, 6722, 6899, 7040, 7046, 7048, 7057, 7076, 708, 7291, 7424, 74…
GO:0071229	cellular response to acid chemical	GOBP	131	-0.042117	0.769711	1.98542e-05	0.000261828	up in HPV(-)	1051, 1277, 1278, 1281, 1282, 1288, 1290, 1291, 1374, 1645, 1646, 1789, 19, 197131, 22938, 23677, 26012, 27, 27429, 2778, 302, 3843, 4313, 4314, 4830, 5155, 55004, 55022, 56034, 56603, 57521, 5754, 5914, 6281, 6422, 6899, 7472, 7473, 7474, 7475, 7477, 7481, 81029
GO:1901576	organic substance biosynthetic process	GOBP	4776	0.00959876	1.06147	2.07272e-05	0.00027263	up in HPV(+)	10009, 100101467, 100128927, 100129654, 10013, 100131390, 100131827, 10020, 10026, 100289635, 100289678, 100316904, 10036, 10062, 10087, 101, 10148, 1017, 10194, 10224, 10243, 10250, 10266, 1027, 1028, 1029, 10318, 1032, 10327, 10333, 10336, 10347, 10352, 10389, 10390, 10472, 10475, 10481, 10499, 10521, 10522, 10533, 10535, 10538, 10595, 10600, 10614, 10628, 1063, 10636, 10656, 10657, 10714, 1072…
GO:0065007	biological regulation	GOBP	8334	0.00984639	1.0631	2.09295e-05	0.000274577	up in HPV(+)	10000, 10008, 10009, 100101467, 100128927, 100129654, 10013, 100131390, 100131827, 10018, 10023, 100271715, 100289635, 100289678, 100316904, 10036, 10042, 10044, 10062, 10077, 10087, 101, 10103, 10125, 10126, 10148, 10149, 10161, 10163, 1017, 10181, 10194, 10219, 10224, 10225, 10235, 10261, 10266, 1027, 10270, 10277, 1028, 1029, 10293, 10297, 10309, 10318, 1032, 10326, 10333, 10336, 10343, 10347,…
GO:0007389	pattern specification process	GOBP	370	-0.0271794	0.844586	2.12744e-05	0.000278381	up in HPV(-)	10468, 10512, 10655, 10787, 123016, 1282, 129880, 145258, 1482, 153572, 1649, 1745, 1746, 1848, 1906, 1909, 1947, 2016, 2018, 2019, 221833, 22943, 2303, 23237, 23242, 23509, 25806, 25928, 2626, 2637, 2668, 2697, 27130, 2719, 2735, 2736, 28514, 28996, 3091, 3110, 3170, 3198, 3207, 3215, 3216, 3217, 3218, 3227, 3229, 3235, 3236, 3237, 3955, 4010, 4188, 4488, 4618, 4776, 4909, 5077, 50805, 5081, 509…
GO:0006935	chemotaxis	GOBP	564	-0.0225056	0.869477	2.20605e-05	0.000287184	up in HPV(-)	1012, 10344, 10371, 10381, 103910, 10398, 10417, 10487, 10505, 10512, 10570, 1072, 11023, 112616, 123016, 123920, 1280, 1281, 1282, 1284, 1287, 1289, 1290, 1291, 1292, 1400, 1459, 1460, 146223, 148738, 152189, 1673, 170302, 1749, 1809, 185, 1906, 1909, 1942, 1944, 1946, 1947, 1948, 1949, 196527, 2043, 2048, 2049, 2118, 2131, 2150, 2152, 22885, 23114, 23365, 23767, 23768, 2596, 2621, 2637, 2668, 2…
GO:0042330	taxis	GOBP	564	-0.0225056	0.869477	2.20605e-05	0.000287184	up in HPV(-)	1012, 10344, 10371, 10381, 103910, 10398, 10417, 10487, 10505, 10512, 10570, 1072, 11023, 112616, 123016, 123920, 1280, 1281, 1282, 1284, 1287, 1289, 1290, 1291, 1292, 1400, 1459, 1460, 146223, 148738, 152189, 1673, 170302, 1749, 1809, 185, 1906, 1909, 1942, 1944, 1946, 1947, 1948, 1949, 196527, 2043, 2048, 2049, 2118, 2131, 2150, 2152, 22885, 23114, 23365, 23767, 23768, 2596, 2621, 2637, 2668, 2…
GO:0051147	regulation of muscle cell differentiation	GOBP	110	-0.0448518	0.75674	2.24033e-05	0.000290898	up in HPV(-)	1000, 1013, 10324, 10938, 144165, 1482, 150572, 1649, 1827, 1906, 1948, 2069, 221662, 22943, 26287, 27231, 3084, 30846, 3399, 341676, 3486, 4205, 4618, 463, 4656, 56603, 57616, 6300, 650, 652, 6722, 6899, 6926, 7040, 7067, 84193, 84814, 859, 9043, 91653, 9472, 9643
GO:0046907	intracellular transport	GOBP	1368	-0.0151702	0.910031	2.25544e-05	0.000292111	up in HPV(-)	10016, 10043, 10105, 10128, 10133, 10134, 10165, 10204, 10345, 10440, 10452, 10476, 10484, 10490, 10514, 10527, 10553, 10597, 10627, 10632, 10651, 10652, 1072, 10749, 10913, 10938, 10945, 10952, 10953, 10956, 10959, 10971, 10972, 10981, 11014, 11031, 11037, 11142, 11224, 11236, 11267, 11269, 114879, 116988, 1174, 1213, 1314, 1315, 136, 1374, 1410, 144165, 147700, 147906, 1523, 152503, 155382, 163…
GO:0051797	regulation of hair follicle development	GOBP	13	-0.0902173	0.570829	2.28839e-05	0.000295623	up in HPV(-)	1001, 10468, 3872, 4488, 51083, 6608
GO:0009058	biosynthetic process	GOBP	4841	0.00952067	1.06095	2.30934e-05	0.00029757	up in HPV(+)	10009, 100101467, 100128927, 100129654, 10013, 100131390, 100131827, 10020, 10026, 100289635, 100289678, 100316904, 10036, 10062, 10087, 101, 10148, 1017, 10194, 10224, 10243, 10250, 10266, 1027, 1028, 1029, 10318, 1032, 10327, 10333, 10336, 10347, 10352, 10389, 10390, 10472, 10475, 10481, 10499, 10521, 10522, 10533, 10535, 10538, 10595, 10600, 10614, 10628, 1063, 10636, 10656, 10657, 10714, 1072…
GO:1902582	single-organism intracellular transport	GOBP	1154	-0.0162366	0.90402	2.54047e-05	0.000326522	up in HPV(-)	10043, 10105, 10128, 10133, 10134, 10165, 10204, 10345, 10440, 10452, 10476, 10484, 10527, 10597, 10627, 10632, 10651, 10652, 1072, 10749, 10913, 10938, 10952, 10953, 10956, 10959, 10971, 10972, 10981, 11031, 11142, 11224, 11236, 11267, 114879, 116988, 1174, 1213, 1314, 1315, 136, 1374, 144165, 147700, 147906, 1523, 152503, 155382, 1639, 1649, 1678, 1780, 183, 1896, 19, 1909, 1950, 1984, 2010, 20…
GO:0001837	epithelial to mesenchymal transition	GOBP	84	-0.0493776	0.735752	2.57368e-05	0.000329952	up in HPV(-)	11171, 1277, 145258, 147906, 1942, 2295, 2316, 25805, 25937, 26508, 283149, 3091, 3170, 359845, 4017, 4488, 51384, 54949, 57142, 58495, 6422, 6423, 650, 6591, 6615, 7040, 7041, 7046, 7080, 7291, 7472, 7474, 8091, 9241
GO:0045669	positive regulation of osteoblast differentiation	GOBP	55	-0.0574535	0.699737	2.59275e-05	0.000330818	up in HPV(-)	1051, 1192, 1749, 182, 2201, 23051, 2778, 3491, 3569, 3570, 4488, 4745, 537, 56975, 6423, 650, 652, 658, 6664, 7477, 8519, 860, 90, 9260
GO:0060688	regulation of morphogenesis of a branching structure	GOBP	48	-0.0601936	0.687922	2.5935e-05	0.000330818	up in HPV(-)	11331, 183, 2118, 2119, 23213, 2668, 3217, 4233, 5154, 57142, 6422, 652, 6591, 6608, 7040, 7472, 7474, 859, 9241
GO:0022612	gland morphogenesis	GOBP	108	-0.0448679	0.756664	2.62116e-05	0.000333507	up in HPV(-)	10371, 10512, 10913, 11331, 1896, 2118, 2119, 23213, 25928, 2736, 3209, 3488, 3569, 374, 383, 4233, 4488, 5077, 5154, 5155, 5268, 5744, 6422, 6424, 652, 6591, 6909, 6926, 7022, 7040, 7048, 7052, 7421, 7474, 857, 859, 8829, 9241, 960
GO:0032331	negative regulation of chondrocyte differentiation	GOBP	15	-0.0862121	0.585216	2.66525e-05	0.000338266	up in HPV(-)	11173, 2736, 5744, 652, 6591, 7046, 81792
GO:0045579	positive regulation of B cell differentiation	GOBP	11	0.0591951	1.44466	2.69512e-05	0.000341202	up in HPV(+)	3071, 3635, 6776, 6850, 695, 939
GO:1901019	regulation of calcium ion transmembrane transporter activity	GOBP	43	-0.0623441	0.67879	2.72145e-05	0.000342822	up in HPV(-)	10345, 10681, 1482, 2280, 3270, 5350, 57158, 57338, 6271, 6588, 6717, 6786, 79026, 817, 845, 84766, 859, 9446, 9472
GO:1903169	regulation of calcium ion transmembrane transport	GOBP	43	-0.0623441	0.67879	2.72145e-05	0.000342822	up in HPV(-)	10345, 10681, 1482, 2280, 3270, 5350, 57158, 57338, 6271, 6588, 6717, 6786, 79026, 817, 845, 84766, 859, 9446, 9472
GO:0071103	DNA conformation change	GOBP	162	0.0313067	1.21477	2.88833e-05	0.00036294	up in HPV(+)	10036, 10051, 10270, 1029, 10592, 10595, 1105, 148479, 1677, 1763, 23421, 25788, 29781, 3070, 3087, 3148, 387103, 4171, 4172, 4173, 4174, 4175, 4176, 4676, 4678, 50511, 50809, 51203, 54892, 55723, 55870, 57082, 5928, 5931, 64061, 64105, 64946, 7153, 7155, 7157, 7175, 79172, 79682, 8208, 83983, 83990, 8970, 983
GO:0044851	hair cycle phase	GOBP	15	-0.0859605	0.586132	2.91612e-05	0.000365526	up in HPV(-)	1001, 1515, 207, 4488, 51083, 5467, 5743
GO:0010595	positive regulation of endothelial cell migration	GOBP	53	-0.0579136	0.697739	2.93622e-05	0.000367136	up in HPV(-)	10016, 14, 147372, 183, 1906, 207, 2303, 27286, 306, 3690, 4233, 5155, 5578, 5743, 652, 6678, 7040, 7057, 7424, 7474, 8828, 8829, 9270, 949, 9564
GO:0060070	canonical Wnt signaling pathway	GOBP	190	-0.0354897	0.802074	3.12966e-05	0.000390359	up in HPV(-)	1000, 1001, 10413, 1277, 144165, 1453, 147906, 1482, 1613, 1649, 1749, 1896, 2010, 22943, 23399, 2535, 25805, 25928, 25937, 2626, 26524, 27122, 27130, 2719, 2735, 283149, 3728, 4163, 4609, 4624, 50964, 51339, 54475, 54949, 5523, 5754, 59352, 595, 6422, 6423, 6424, 650, 6591, 65981, 6608, 6788, 7472, 7473, 7474, 7476, 7477, 7481, 79971, 80114, 81029, 8312, 84133, 85407, 85458, 857, 9096, 9241
GO:0045582	positive regulation of T cell differentiation	GOBP	55	0.0421533	1.29948	3.1744e-05	0.000394968	up in HPV(+)	101, 146206, 3071, 3108, 3559, 3574, 3593, 3594, 4179, 4602, 50943, 51561, 54440, 55340, 6363, 6776, 6850, 7292, 7535, 8546, 8876, 9308, 942, 972
GO:0000723	telomere maintenance	GOBP	65	0.0403857	1.28529	3.29465e-05	0.000408924	up in HPV(+)	10714, 142, 1763, 2237, 23137, 23649, 3978, 5111, 5422, 5424, 5426, 5427, 5983, 5984, 5985, 6118, 64421, 64858, 79677, 8658
GO:0030036	actin cytoskeleton organization	GOBP	450	-0.024374	0.859439	3.31395e-05	0.000409313	up in HPV(-)	10095, 10096, 10109, 10324, 10344, 10391, 10395, 10411, 10435, 10458, 10487, 1072, 1073, 10787, 10810, 11133, 11155, 112464, 114793, 119, 121512, 1264, 129446, 1398, 1482, 1490, 1515, 1613, 1627, 165904, 1809, 1906, 1946, 2150, 2275, 22885, 22998, 23002, 2316, 23189, 23242, 23363, 23433, 23603, 23647, 26499, 27, 27063, 29108, 29109, 2934, 29780, 29984, 30846, 3265, 359845, 3636, 3693, 375, 3845, …
GO:0060603	mammary gland duct morphogenesis	GOBP	37	-0.0650302	0.667553	3.31089e-05	0.000409313	up in HPV(-)	11331, 2118, 2119, 25928, 2736, 374, 4488, 5744, 6926, 7022, 7040, 7421, 7474, 859
GO:0014033	neural crest cell differentiation	GOBP	53	-0.0576184	0.69902	3.34449e-05	0.000412081	up in HPV(-)	10371, 10512, 1072, 145258, 182, 1906, 1909, 1947, 2303, 2637, 2668, 3084, 3091, 5077, 58495, 6422, 6591, 6608, 6664, 6899, 7291, 80326, 8828, 8829, 90
GO:0060572	morphogenesis of an epithelial bud	GOBP	15	-0.0855026	0.587802	3.42963e-05	0.000421545	up in HPV(-)	23213, 25928, 2736, 5744, 652, 7472, 7474, 9241
GO:0000018	regulation of DNA recombination	GOBP	46	0.0438727	1.31344	3.47692e-05	0.000425292	up in HPV(+)	2956, 30009, 3458, 4292, 4436, 4437, 50943, 56154, 56852, 6118, 63979, 7292, 8741, 940, 9466
GO:0051239	regulation of multicellular organismal process	GOBP	1828	-0.013103	0.921797	3.47317e-05	0.000425292	up in HPV(-)	100, 1001, 10016, 10052, 10096, 1021, 10234, 10272, 10324, 10330, 10345, 10371, 10398, 10411, 10413, 10468, 10494, 10505, 1051, 10539, 10544, 10553, 10555, 10630, 10634, 10642, 10644, 10655, 10699, 1073, 10810, 11023, 11075, 11171, 11173, 11202, 1131, 11331, 116039, 117581, 1192, 1264, 1277, 1281, 1284, 1289, 1290, 132, 133, 136, 14, 1437, 144165, 1460, 147040, 1471, 147372, 147906, 1482, 1490, 1…
GO:0001936	regulation of endothelial cell proliferation	GOBP	77	-0.050335	0.731387	3.50611e-05	0.000427829	up in HPV(-)	10016, 1012, 10344, 207, 2152, 23213, 3091, 3164, 3690, 383, 51162, 5155, 5365, 5578, 57521, 650, 652, 6678, 7046, 7057, 7472, 7474, 7857, 857, 858, 8828, 8829
GO:0045216	cell-cell junction organization	GOBP	183	-0.035789	0.800584	3.63743e-05	0.000442787	up in HPV(-)	1000, 1001, 1002, 10052, 1006, 1009, 1012, 1013, 10395, 10979, 11187, 129446, 1613, 1828, 1946, 201163, 23114, 23499, 2697, 2706, 29984, 347, 3728, 3801, 3982, 3987, 402, 4323, 4641, 4771, 49861, 55679, 5578, 57493, 57502, 5796, 5817, 5829, 60, 6281, 64065, 6422, 6591, 6615, 6722, 7040, 7057, 7070, 71, 7205, 7414, 7481, 83660, 87, 88, 9074, 9080, 92140, 9253, 9270
GO:0048285	organelle fission	GOBP	480	0.0211449	1.14043	3.6477e-05	0.000442973	up in HPV(+)	10051, 1017, 10270, 10274, 10388, 10403, 10592, 1060, 10600, 1063, 10636, 10734, 10907, 10919, 11004, 11022, 11040, 11078, 11113, 11130, 11144, 115106, 121441, 122402, 143689, 146909, 147841, 148479, 150365, 151246, 151648, 152185, 157313, 162655, 2175, 2177, 220134, 2261, 23047, 23113, 23122, 23126, 23137, 23244, 23331, 23354, 23383, 23421, 24149, 245711, 256126, 25788, 259266, 25936, 25970, 260…
GO:0050794	regulation of cellular process	GOBP	7582	0.00922511	1.05901	3.79656e-05	0.000459947	up in HPV(+)	10000, 10008, 10009, 100101467, 100128927, 100129654, 10013, 100131390, 100131827, 10018, 10023, 100271715, 100289635, 100289678, 100316904, 10036, 10042, 10044, 10062, 10077, 10087, 101, 10103, 10125, 10126, 10148, 10149, 10161, 10163, 1017, 10181, 10194, 10219, 10224, 10235, 10261, 10266, 1027, 10270, 10277, 1028, 1029, 10293, 10297, 10309, 10318, 1032, 10326, 10333, 10336, 10343, 10347, 10385,…
GO:0042475	odontogenesis of dentin-containing tooth	GOBP	72	-0.0513136	0.726953	3.97599e-05	0.000480535	up in HPV(-)	10468, 10913, 133, 1745, 1746, 1747, 1896, 25928, 2736, 3655, 401138, 4488, 4771, 56975, 58524, 6331, 64065, 650, 652, 6608, 6899, 7475, 7477, 80326, 860, 9313, 9622
GO:0090504	epiboly	GOBP	14	-0.0867364	0.583312	4.02809e-05	0.000485673	up in HPV(-)	1289, 1839, 1861, 3491, 3678, 4488, 7476
GO:0060343	trabecula formation	GOBP	25	-0.0730333	0.635163	4.11545e-05	0.000495028	up in HPV(-)	1277, 1482, 2201, 2274, 2280, 4313, 4488, 58495, 5950, 6422, 6722, 859, 9510
GO:0032200	telomere organization	GOBP	66	0.0399018	1.28143	4.20958e-05	0.00050515	up in HPV(+)	10714, 142, 1763, 2237, 23137, 23649, 3978, 5111, 5422, 5424, 5426, 5427, 5983, 5984, 5985, 6118, 64421, 64858, 79677, 8658
GO:0001558	regulation of cell growth	GOBP	276	-0.0298304	0.830785	4.24903e-05	0.000508678	up in HPV(-)	10071, 1012, 10371, 10505, 10634, 11007, 1410, 147906, 1490, 150465, 151242, 1594, 183, 1839, 185, 201163, 207, 2137, 2182, 2258, 2273, 2305, 2335, 23677, 26153, 27000, 2786, 2810, 29948, 3084, 323, 3300, 3485, 3486, 3487, 3488, 3489, 3490, 3491, 3624, 3872, 3984, 4131, 4137, 4323, 4633, 4803, 5048, 51009, 51083, 51232, 51330, 5270, 54512, 5467, 55031, 55558, 5654, 57142, 57611, 58189, 60676, 642…
GO:0009792	embryo development ending in birth or egg hatching	GOBP	554	-0.0219108	0.872697	4.27301e-05	0.000510342	up in HPV(-)	100, 10290, 10395, 1051, 10512, 10655, 1072, 10787, 113026, 116039, 1277, 1280, 1301, 133, 1437, 144165, 145258, 1482, 1745, 1746, 1845, 1906, 1909, 201163, 2016, 2019, 203447, 207, 2131, 2182, 22943, 2303, 23213, 23242, 23509, 23760, 23764, 2535, 25988, 26115, 2624, 2626, 2637, 2697, 2736, 2768, 2778, 28514, 29924, 3091, 3110, 3170, 3198, 3207, 321, 3215, 3216, 3217, 3218, 3227, 3235, 3236, 3237…
GO:0010634	positive regulation of epithelial cell migration	GOBP	74	-0.0506077	0.730149	4.34841e-05	0.000518125	up in HPV(-)	10016, 14, 147372, 183, 1839, 1906, 207, 2303, 27286, 306, 3091, 3690, 4233, 5155, 5216, 5578, 5743, 652, 6678, 7040, 7048, 7057, 7424, 7474, 8828, 8829, 9270, 949, 9564
GO:0006302	double-strand break repair	GOBP	125	0.0333573	1.23035	4.39124e-05	0.000522001	up in HPV(+)	113510, 131870, 142, 157570, 1763, 2140, 2237, 22909, 23137, 253714, 25788, 348654, 3978, 4292, 4436, 4796, 5422, 56154, 5889, 6118, 63979, 6419, 64421, 672, 7157, 7516, 7913, 79184, 79677, 79728, 83990, 84142, 8438, 9665, 9985
GO:0030195	negative regulation of blood coagulation	GOBP	30	-0.0687782	0.652183	4.48359e-05	0.000530488	up in HPV(-)	1906, 2191, 302, 3848, 5054, 5154, 5155, 5270, 5328, 5624, 7057, 710
GO:1900047	negative regulation of hemostasis	GOBP	30	-0.0687782	0.652183	4.48359e-05	0.000530488	up in HPV(-)	1906, 2191, 302, 3848, 5054, 5154, 5155, 5270, 5328, 5624, 7057, 710
GO:2000147	positive regulation of cell motility	GOBP	257	-0.0306557	0.826535	4.54751e-05	0.000536798	up in HPV(-)	10016, 1012, 10344, 10371, 10630, 1277, 131578, 14, 147372, 183, 1839, 1906, 1909, 207, 2149, 2150, 2152, 22800, 2303, 26012, 2621, 27286, 284114, 29108, 29984, 306, 3091, 3265, 3309, 338879, 3491, 3569, 3570, 3576, 3667, 3678, 3690, 3912, 4233, 4323, 4638, 4641, 50507, 5054, 5154, 5155, 5159, 5216, 5578, 5649, 5743, 59352, 6278, 6375, 650, 652, 6591, 6615, 6678, 7040, 7048, 7057, 708, 7205, 7291…
GO:0006521	regulation of cellular amino acid metabolic process	GOBP	56	-0.0557983	0.706972	4.60079e-05	0.000541824	up in HPV(-)	10197, 10213, 1312, 1728, 4953, 5682, 5684, 5687, 5688, 5689, 5691, 5693, 5695, 5700, 5701, 5702, 5705, 5706, 5707, 5708, 5709, 5713, 5715, 5717, 5718, 5719, 9491
GO:0007156	homophilic cell adhesion	GOBP	100	-0.0450492	0.755811	4.67331e-05	0.000549087	up in HPV(-)	1000, 1001, 1002, 1006, 1009, 1012, 1013, 1014, 1828, 26167, 27253, 341640, 347902, 3897, 5098, 5099, 54510, 56097, 56099, 56100, 56101, 56103, 56104, 56121, 56123, 56124, 56125, 56128, 56129, 56130, 56131, 56133, 57526, 57717, 64084, 64881, 8641, 92211, 9708
GO:0031214	biomineral tissue development	GOBP	106	-0.0439861	0.760822	4.81195e-05	0.000564068	up in HPV(-)	116039, 1277, 1594, 196527, 2201, 24144, 249, 2621, 2697, 2719, 286077, 3091, 3381, 401138, 4256, 4322, 4488, 4745, 51119, 5251, 54829, 56975, 5743, 5745, 650, 652, 658, 6899, 7040, 7071, 7286, 7291, 7475, 7481, 90, 9270, 9313
GO:0000278	mitotic cell cycle	GOBP	841	0.0166934	1.10932	4.98223e-05	0.000582679	up in HPV(+)	10051, 10112, 1017, 1027, 10270, 10274, 1029, 1032, 10403, 10426, 10592, 1060, 10600, 1063, 10636, 10657, 10714, 10733, 10907, 10950, 11004, 11040, 11078, 11113, 11130, 11190, 114799, 115106, 121441, 128239, 132660, 134353, 144455, 146909, 147841, 148479, 151246, 151648, 152185, 157313, 157570, 1763, 1785, 1859, 1869, 1870, 1875, 199, 2146, 220134, 2237, 2261, 22981, 22995, 23047, 23087, 23113, 2…
GO:0043368	positive T cell selection	GOBP	21	0.051462	1.37687	5.06216e-05	0.000590663	up in HPV(+)	10538, 1794, 3108, 3593, 3594, 3662, 387357, 51561, 596, 7535, 915, 972
GO:0043009	chordate embryonic development	GOBP	549	-0.0217899	0.873353	5.08741e-05	0.000592245	up in HPV(-)	100, 10290, 10395, 1051, 10512, 10655, 1072, 10787, 113026, 116039, 1277, 1280, 1301, 133, 1437, 144165, 145258, 1482, 1745, 1746, 1845, 1906, 1909, 201163, 2016, 2019, 203447, 207, 2131, 22943, 2303, 23213, 23242, 23509, 23760, 23764, 2535, 25988, 26115, 2624, 2626, 2637, 2697, 2736, 2768, 2778, 28514, 29924, 3091, 3110, 3170, 3198, 3207, 321, 3215, 3216, 3217, 3218, 3227, 3235, 3236, 3237, 3297…
GO:0007267	cell-cell signaling	GOBP	922	-0.0172274	0.89847	5.26175e-05	0.000609736	up in HPV(-)	10052, 1006, 10060, 10089, 10135, 10344, 10411, 10458, 10505, 107, 10769, 11069, 11202, 113, 1131, 1144, 1146, 1312, 133, 1374, 149111, 152, 1627, 1728, 183, 1837, 1861, 1906, 1942, 1944, 1946, 1947, 1948, 1949, 2028, 2030, 2048, 2049, 2069, 2119, 2250, 2258, 2259, 22839, 22941, 22943, 2300, 23237, 23478, 23551, 23630, 24145, 2535, 2550, 2569, 25769, 26012, 26056, 26167, 2626, 2668, 2697, 2706, 2…
GO:0042108	positive regulation of cytokine biosynthetic process	GOBP	50	0.0424488	1.30187	5.25641e-05	0.000609736	up in HPV(+)	10148, 10333, 115650, 3458, 3593, 3659, 3662, 4050, 51284, 51311, 54106, 602, 6693, 6776, 6850, 7096, 7098, 7124, 729230, 84433, 916, 920, 940, 942, 943
GO:2000026	regulation of multicellular organismal development	GOBP	1154	-0.0155764	0.907737	5.35323e-05	0.000618922	up in HPV(-)	100, 1001, 10016, 10096, 1021, 10234, 10272, 10324, 10371, 10411, 10413, 10468, 10494, 10505, 10553, 10634, 10655, 1073, 10810, 11023, 11075, 11171, 11173, 11202, 11331, 116039, 1277, 1281, 1284, 1289, 1290, 133, 144165, 147040, 147372, 147906, 1482, 1490, 150465, 150572, 152, 1523, 1594, 161882, 1627, 1649, 169200, 1716, 1745, 1746, 1761, 1789, 1809, 182, 183, 1848, 1906, 1909, 1942, 1948, 1950,…
GO:0050871	positive regulation of B cell activation	GOBP	51	0.0422032	1.29989	5.41782e-05	0.000624962	up in HPV(+)	10673, 115650, 1880, 30009, 3071, 3458, 3574, 3635, 54440, 596, 6776, 6850, 695, 7292, 7293, 84433, 8741, 939, 940, 972
GO:0050789	regulation of biological process	GOBP	7966	0.0091608	1.05858	5.48387e-05	0.000631143	up in HPV(+)	10000, 10008, 10009, 100101467, 100128927, 100129654, 10013, 100131390, 100131827, 10018, 10023, 100271715, 100289635, 100289678, 100316904, 10036, 10042, 10044, 10062, 10077, 10087, 101, 10103, 10125, 10126, 10148, 10149, 10161, 10163, 1017, 10181, 10194, 10219, 10224, 10225, 10235, 10261, 10266, 1027, 10270, 10277, 1028, 1029, 10293, 10297, 10309, 10318, 1032, 10326, 10333, 10336, 10343, 10347,…
GO:0002063	chondrocyte development	GOBP	18	-0.0797216	0.609304	5.62179e-05	0.000642635	up in HPV(-)	1301, 23213, 4488, 50515, 55959, 6423, 860, 871
GO:0030879	mammary gland development	GOBP	124	-0.0410586	0.77479	5.61053e-05	0.000642635	up in HPV(-)	1051, 11331, 1723, 1950, 2030, 207, 2118, 2119, 25928, 2736, 3084, 3091, 3235, 3488, 353, 3667, 374, 383, 4488, 4830, 5066, 5077, 540, 5744, 595, 6424, 652, 6608, 6909, 6926, 7022, 7039, 7040, 7048, 7421, 7472, 7473, 7474, 7477, 857, 859, 8660, 8862
GO:0042634	regulation of hair cycle	GOBP	19	-0.0784618	0.614093	5.61207e-05	0.000642635	up in HPV(-)	1001, 10468, 162514, 3872, 4488, 51083, 6608
GO:0055117	regulation of cardiac muscle contraction	GOBP	61	-0.0536585	0.716436	5.66579e-05	0.000646207	up in HPV(-)	10052, 1482, 1490, 23630, 2626, 2697, 3270, 3728, 3753, 477, 4842, 5350, 55800, 6324, 6327, 6330, 6331, 6640, 6717, 775, 817, 845, 859, 9446
GO:0035710	CD4-positive, alpha-beta T cell activation	GOBP	49	0.0425071	1.30234	5.84977e-05	0.000665691	up in HPV(+)	10538, 159296, 2529, 3071, 3593, 3594, 3662, 3718, 4602, 5075, 50943, 51561, 54440, 55340, 5734, 5971, 602, 6097, 6304, 6363, 64218, 7292, 9308, 942
GO:0006024	glycosaminoglycan biosynthetic process	GOBP	98	-0.0449221	0.756409	5.8795e-05	0.000667573	up in HPV(-)	10082, 10090, 11046, 1213, 1462, 1464, 176, 1950, 2131, 2132, 222537, 22856, 2719, 2817, 3036, 3038, 3340, 4060, 50515, 5155, 5159, 54480, 55454, 56548, 633, 6383, 7040, 7358, 79369, 79586, 8534, 8704, 92126, 9469
GO:0051272	positive regulation of cellular component movement	GOBP	263	-0.029934	0.83025	5.92745e-05	0.000671513	up in HPV(-)	10016, 1012, 10344, 10371, 10630, 1277, 131578, 14, 147372, 183, 1839, 1906, 1909, 207, 2149, 2150, 2152, 22800, 2303, 26012, 2621, 27286, 284114, 29108, 29984, 306, 3091, 3265, 3309, 338879, 3491, 3569, 3570, 3576, 3667, 3678, 3690, 3912, 4233, 4323, 4638, 4641, 50507, 5054, 5154, 5155, 5159, 5216, 5578, 5649, 5743, 59352, 6278, 6375, 650, 652, 6591, 6615, 6678, 7040, 7046, 7048, 7057, 708, 7205…
GO:0040036	regulation of fibroblast growth factor receptor signaling pathway	GOBP	24	-0.0729381	0.635539	5.99667e-05	0.000677837	up in HPV(-)	1848, 23213, 2817, 5155, 55959, 56975, 64399, 7057, 7474, 860, 9241, 9982
GO:0006412	translation	GOBP	484	-0.0227991	0.867892	6.22689e-05	0.000702293	up in HPV(-)	10056, 10102, 10128, 10480, 10573, 10605, 10642, 10644, 10884, 10952, 11222, 11224, 11236, 122704, 123263, 124995, 128308, 132864, 16, 1613, 1653, 1734, 1917, 1936, 1964, 1965, 1981, 1983, 1984, 200916, 207, 2197, 219927, 23, 23034, 23478, 23480, 23708, 24140, 2597, 2617, 27161, 27230, 28985, 28998, 29074, 29088, 3396, 340719, 3488, 3508, 351, 3569, 3692, 3735, 3872, 440275, 5036, 51067, 51069, 5…
GO:0002455	humoral immune response mediated by circulating immunoglobulin	GOBP	34	0.0461578	1.33223	6.32375e-05	0.000711632	up in HPV(+)	1191, 1378, 1380, 2208, 2302, 3119, 3123, 3127, 4049, 4179, 55340, 5777, 602, 712, 7124, 713, 714, 718, 727, 730, 733, 9156
GO:0060828	regulation of canonical Wnt signaling pathway	GOBP	144	-0.0384206	0.787597	6.3737e-05	0.000715664	up in HPV(-)	1000, 10413, 1277, 144165, 1453, 147906, 1482, 1613, 1649, 1749, 1896, 2010, 22943, 23399, 25805, 25928, 25937, 26524, 27122, 27130, 2719, 2735, 3728, 4163, 50964, 51339, 54475, 54949, 5523, 59352, 6422, 6423, 6424, 650, 6591, 65981, 6788, 7472, 7474, 7476, 7481, 79971, 80114, 81029, 8312, 84133, 85407, 85458, 857, 9096, 9241
GO:0045577	regulation of B cell differentiation	GOBP	20	0.0516267	1.37829	6.41439e-05	0.000718639	up in HPV(+)	150372, 22806, 3071, 3398, 3635, 5777, 6776, 6850, 695, 84433, 939
GO:0051153	regulation of striated muscle cell differentiation	GOBP	74	-0.0497374	0.734108	6.43917e-05	0.000719822	up in HPV(-)	10324, 10938, 144165, 1482, 150572, 1649, 1906, 1948, 221662, 22943, 26287, 27231, 3084, 30846, 3399, 341676, 3486, 463, 4656, 56603, 650, 652, 6899, 6926, 7040, 7067, 84814, 859, 91653, 9472, 9643
GO:0030178	negative regulation of Wnt signaling pathway	GOBP	114	-0.042083	0.769873	6.71052e-05	0.000748503	up in HPV(-)	1000, 144165, 145258, 147495, 147906, 1482, 1649, 22943, 25928, 25937, 25987, 26524, 27122, 27130, 2719, 2735, 3090, 3728, 388630, 4163, 4188, 50964, 51339, 54949, 5523, 595, 6422, 6423, 6424, 64359, 650, 6591, 6788, 7088, 7474, 7481, 80114, 81029, 8312, 84133, 85407, 857, 9096, 9241
GO:0046643	regulation of gamma-delta T cell activation	GOBP	11	0.0578428	1.43257	6.74936e-05	0.000751182	up in HPV(+)	10859, 3071, 55340, 6097, 6776, 6850, 9580
GO:0030177	positive regulation of Wnt signaling pathway	GOBP	80	-0.0481935	0.741186	6.80485e-05	0.000755696	up in HPV(-)	10413, 1277, 1453, 1613, 1749, 1896, 23189, 23213, 23399, 23499, 25805, 2719, 3728, 51339, 54475, 5523, 55959, 59352, 6299, 6422, 6423, 6424, 650, 65981, 7472, 7476, 79971, 85407, 85458, 857
GO:0006023	aminoglycan biosynthetic process	GOBP	99	-0.044376	0.75898	7.00755e-05	0.000776504	up in HPV(-)	10082, 10090, 11046, 1213, 1462, 1464, 176, 1950, 2131, 2132, 222537, 22856, 2719, 2817, 3036, 3038, 3340, 4060, 50515, 5155, 5159, 54480, 55454, 56548, 633, 6383, 7040, 7358, 79369, 79586, 8534, 8704, 92126, 9469
GO:0006939	smooth muscle contraction	GOBP	76	-0.048841	0.738209	7.71334e-05	0.000852846	up in HPV(-)	100, 1131, 1264, 136, 152, 1613, 183, 1906, 1909, 2149, 219931, 23213, 2668, 3352, 3363, 4638, 477, 5592, 55959, 56923, 5743, 57616, 59, 6525, 6722, 6915, 7137, 775, 857, 8877
GO:2000651	positive regulation of sodium ion transmembrane transporter activity	GOBP	11	0.0576258	1.43064	7.77535e-05	0.00085783	up in HPV(+)	1756, 2745, 54997, 65268
GO:0006333	chromatin assembly or disassembly	GOBP	99	0.0348148	1.24155	8.47172e-05	0.000932626	up in HPV(+)	10036, 1029, 11240, 196528, 23421, 3070, 3148, 387103, 4171, 4676, 4678, 50809, 55723, 57082, 5928, 5931, 64061, 64105, 64946, 6597, 6599, 6601, 7157, 7175, 79172, 79682, 8208, 8289, 8479, 8970
GO:0048704	embryonic skeletal system morphogenesis	GOBP	89	-0.0457863	0.752357	8.56736e-05	0.000941109	up in HPV(-)	116039, 1280, 1301, 145258, 1746, 2303, 2778, 3198, 3207, 3215, 3216, 3217, 3218, 3227, 3235, 3236, 3237, 3340, 4188, 4323, 4325, 50515, 51450, 60529, 652, 6608, 6664, 6899, 7046, 7048, 7291, 8312, 860, 9241, 9775
GO:0048820	hair follicle maturation	GOBP	17	-0.0796241	0.609673	9.1808e-05	0.00100631	up in HPV(-)	1001, 1515, 207, 4488, 51083, 5467, 5743
GO:0031497	chromatin assembly	GOBP	77	0.0372403	1.26041	9.21167e-05	0.00100751	up in HPV(+)	10036, 1029, 23421, 3070, 3148, 387103, 4171, 4676, 4678, 50809, 55723, 57082, 5928, 5931, 64061, 64105, 64946, 7157, 7175, 79172, 79682, 8208, 8970
GO:0031589	cell-substrate adhesion	GOBP	249	-0.0299037	0.830407	9.32775e-05	0.00101801	up in HPV(-)	10109, 1012, 1021, 10395, 10894, 10979, 11117, 1277, 1281, 1295, 1305, 1308, 1490, 1613, 183, 1896, 1942, 1946, 2049, 22795, 22801, 23189, 2335, 23499, 2621, 29984, 347, 3491, 3655, 3678, 3690, 3693, 3912, 3915, 3956, 3987, 402, 4059, 4323, 4771, 4811, 50509, 5054, 51144, 51330, 5328, 5467, 54749, 55742, 57348, 5796, 5829, 5861, 5881, 6281, 63923, 64093, 6422, 6695, 6722, 7057, 7070, 708, 7205, 7…
GO:0060742	epithelial cell differentiation involved in prostate gland development	GOBP	11	0.0572706	1.42749	9.76834e-05	0.0010638	up in HPV(+)	10481, 3169, 6776
GO:0001942	hair follicle development	GOBP	82	-0.0468875	0.747226	9.97961e-05	0.00107754	up in HPV(-)	1001, 10468, 10913, 147495, 1515, 16, 1896, 207, 22943, 25928, 2778, 3229, 3488, 3624, 3872, 4488, 51083, 5154, 5467, 5743, 5970, 60485, 60529, 6608, 6615, 7022, 7053, 80326
GO:0002285	lymphocyte activation involved in immune response	GOBP	98	0.0346872	1.24057	9.97355e-05	0.00107754	up in HPV(+)	10538, 10859, 159296, 1880, 2185, 23228, 2956, 30009, 3109, 3458, 3593, 3594, 3662, 3683, 3718, 3964, 4064, 4179, 4292, 4436, 4602, 50943, 51561, 5734, 57379, 5971, 602, 6097, 6363, 64218, 7157, 7292, 8320, 8741, 911, 9156, 940, 942, 9466, 959
GO:0022404	molting cycle process	GOBP	82	-0.0468875	0.747226	9.97961e-05	0.00107754	up in HPV(-)	1001, 10468, 10913, 147495, 1515, 16, 1896, 207, 22943, 25928, 2778, 3229, 3488, 3624, 3872, 4488, 51083, 5154, 5467, 5743, 5970, 60485, 60529, 6608, 6615, 7022, 7053, 80326
GO:0022405	hair cycle process	GOBP	82	-0.0468875	0.747226	9.97961e-05	0.00107754	up in HPV(-)	1001, 10468, 10913, 147495, 1515, 16, 1896, 207, 22943, 25928, 2778, 3229, 3488, 3624, 3872, 4488, 51083, 5154, 5467, 5743, 5970, 60485, 60529, 6608, 6615, 7022, 7053, 80326
GO:0016192	vesicle-mediated transport	GOBP	1010	-0.0159115	0.905848	0.000100645	0.0010844	up in HPV(-)	10043, 10059, 10096, 10109, 1012, 10121, 10130, 10133, 10134, 10175, 10188, 10226, 10244, 10458, 10484, 10487, 10490, 1053, 10597, 10652, 1072, 10749, 10787, 10897, 10938, 10945, 10959, 10972, 11014, 11015, 11031, 11037, 11069, 11236, 114879, 1174, 1213, 1314, 1315, 133, 136, 136853, 1398, 1523, 152503, 1861, 19, 1950, 196051, 2150, 2181, 22925, 22927, 22943, 23085, 2316, 23233, 23237, 23256, 233…
GO:0000188	inactivation of MAPK activity	GOBP	27	-0.0688481	0.6519	0.000102432	0.0011013	up in HPV(-)	11072, 150290, 1845, 1848, 1852, 2873, 51562, 5578, 5998, 5999, 857
GO:0051649	establishment of localization in cell	GOBP	1932	-0.0119845	0.928227	0.000105717	0.00113422	up in HPV(-)	1001, 10016, 10043, 10059, 10096, 10105, 10128, 10133, 10134, 10165, 10204, 10244, 10345, 10411, 10440, 10452, 10476, 10484, 10487, 10490, 10514, 10527, 10540, 10553, 10597, 10627, 10632, 10651, 10652, 1072, 10749, 10758, 10913, 10938, 10945, 10952, 10953, 10956, 10959, 10971, 10972, 10981, 11014, 11031, 11037, 11069, 11142, 11224, 11236, 11267, 11269, 1131, 114879, 116988, 1174, 1213, 129880, 13…
GO:0060389	pathway-restricted SMAD protein phosphorylation	GOBP	37	-0.0620565	0.680004	0.000106319	0.00113827	up in HPV(-)	11171, 1460, 22943, 3624, 392255, 56937, 650, 652, 7040, 7046, 7048, 90, 9241
GO:0032330	regulation of chondrocyte differentiation	GOBP	38	-0.0614857	0.68242	0.000107136	0.00114459	up in HPV(-)	11173, 1490, 2734, 2736, 3207, 3237, 4017, 5447, 5744, 5970, 652, 6591, 6660, 7046, 81792, 860
GO:0002479	antigen processing and presentation of exogenous peptide antigen via MHC class I, TAP-dependent	GOBP	73	-0.0487973	0.73841	0.000107822	0.0011495	up in HPV(-)	10197, 10213, 10952, 23480, 2923, 3107, 3693, 4688, 5682, 5684, 5687, 5688, 5689, 5691, 5693, 5695, 5700, 5701, 5702, 5705, 5706, 5707, 5708, 5709, 5713, 5715, 5717, 5718, 5719, 7316, 948, 9491
GO:0030335	positive regulation of cell migration	GOBP	251	-0.0295395	0.832288	0.000108938	0.00115896	up in HPV(-)	10016, 1012, 10344, 10371, 10630, 1277, 131578, 14, 147372, 183, 1839, 1906, 1909, 207, 2149, 2150, 2152, 22800, 2303, 26012, 2621, 27286, 284114, 29108, 29984, 306, 3091, 3265, 3309, 3491, 3569, 3570, 3576, 3667, 3678, 3690, 3912, 4233, 4323, 4638, 4641, 50507, 5054, 5154, 5155, 5159, 5216, 5578, 5649, 5743, 59352, 6278, 6375, 650, 652, 6591, 6615, 6678, 7040, 7048, 7057, 708, 7205, 7424, 7474, …
GO:0045086	positive regulation of interleukin-2 biosynthetic process	GOBP	13	0.0552656	1.40981	0.000113542	0.0012054	up in HPV(+)	3662, 6776, 84433, 916, 920, 940, 942
GO:0000003	reproduction	GOBP	680	0.0173518	1.11386	0.000114975	0.00121806	up in HPV(+)	10018, 10051, 10149, 1017, 10343, 10388, 10406, 10420, 10426, 10461, 1047, 10522, 10592, 10656, 10693, 10734, 1080, 10863, 10919, 10983, 11022, 11040, 11063, 11113, 11144, 11218, 1139, 116, 122402, 124626, 1268, 139886, 143689, 148327, 1495, 150365, 1512, 151246, 151648, 1621, 162655, 163589, 166378, 1788, 18, 1869, 2057, 2099, 2175, 2176, 2177, 2185, 2302, 23411, 23598, 24149, 245711, 2475, 2561…
GO:0071230	cellular response to amino acid stimulus	GOBP	44	-0.0583087	0.696028	0.000115474	0.00122079	up in HPV(-)	1051, 1277, 1278, 1281, 1282, 1288, 1290, 1291, 1789, 197131, 23677, 26012, 3843, 4313, 4314, 55004, 56034, 57521
GO:0046629	gamma-delta T cell activation	GOBP	16	0.053054	1.39056	0.000116172	0.00122562	up in HPV(+)	10859, 120425, 3071, 4277, 55340, 6097, 6776, 6850, 9580
GO:0031055	chromatin remodeling at centromere	GOBP	22	0.0497313	1.36214	0.000117471	0.0012359	up in HPV(+)	23421, 3070, 387103, 57082, 5928, 5931, 64105, 64946, 79172, 79682
GO:0045995	regulation of embryonic development	GOBP	90	-0.0448807	0.756603	0.000117635	0.0012359	up in HPV(-)	10655, 116039, 1289, 1290, 1848, 203447, 22943, 23213, 2535, 25819, 2668, 3170, 3909, 3910, 3955, 5077, 5523, 5754, 6422, 6423, 652, 6615, 6909, 7050, 7472, 7474, 84667, 85407, 9096, 91663
GO:0033238	regulation of cellular amine metabolic process	GOBP	73	-0.0485844	0.739388	0.000117957	0.00123672	up in HPV(-)	10197, 10213, 1312, 1728, 2181, 3251, 4953, 5682, 5684, 5687, 5688, 5689, 5691, 5693, 5695, 5700, 5701, 5702, 5705, 5706, 5707, 5708, 5709, 5713, 5715, 5717, 5718, 5719, 6622, 79888, 949, 9491
GO:0090090	negative regulation of canonical Wnt signaling pathway	GOBP	88	-0.0452438	0.754898	0.000119021	0.00124529	up in HPV(-)	1000, 144165, 147906, 1482, 1649, 22943, 25928, 25937, 26524, 27122, 27130, 2719, 2735, 4163, 50964, 51339, 54949, 5523, 6422, 6423, 6424, 650, 6591, 6788, 7474, 7481, 80114, 81029, 8312, 84133, 85407, 857, 9096, 9241
GO:0046633	alpha-beta T cell proliferation	GOBP	22	0.049697	1.36185	0.00012012	0.0012542	up in HPV(+)	10148, 151888, 1794, 3593, 3600, 3659, 51561, 6850, 7292, 729230, 7535, 8764, 916, 940
GO:0006260	DNA replication	GOBP	279	0.0243745	1.16355	0.000123318	0.00128494	up in HPV(+)	10036, 1017, 10535, 1063, 10714, 10721, 10919, 11277, 11284, 114799, 144455, 144715, 157570, 1763, 1854, 201973, 2237, 2272, 23244, 23411, 23649, 253714, 25849, 286826, 29803, 340533, 378708, 3978, 4171, 4172, 4173, 4174, 4175, 4176, 4254, 4678, 4774, 4796, 4998, 51053, 5111, 51147, 51426, 51455, 51514, 51659, 5422, 5424, 5426, 5427, 5429, 56953, 5879, 5928, 5931, 5983, 5984, 5985, 6118, 6241, 63…
GO:0015804	neutral amino acid transport	GOBP	24	-0.0708264	0.643934	0.000126411	0.00131177	up in HPV(-)	23428, 54716, 55117, 55238, 6509, 6520, 6534, 8140, 92745
GO:0071495	cellular response to endogenous stimulus	GOBP	821	-0.0172164	0.898532	0.000126271	0.00131177	up in HPV(-)	1012, 10411, 10458, 1051, 10634, 107, 10938, 10979, 11031, 11075, 11171, 11173, 113, 1277, 1278, 1280, 1281, 1282, 1284, 1288, 1290, 1291, 132864, 135228, 1398, 1460, 1490, 1514, 1645, 1646, 1749, 1789, 1839, 1848, 1874, 1950, 1961, 197131, 1981, 201163, 2069, 207, 2200, 2201, 2250, 2280, 22938, 2303, 2308, 23089, 23189, 23213, 23433, 23625, 23677, 25805, 25937, 26012, 2626, 26508, 26524, 2673, 2…
GO:0044092	negative regulation of molecular function	GOBP	786	-0.0174164	0.897416	0.000143432	0.00148535	up in HPV(-)	10049, 10105, 10188, 10197, 10213, 10345, 10681, 10959, 11009, 11072, 11142, 114794, 116154, 12, 128488, 132864, 135228, 1410, 1471, 1474, 150290, 150684, 151242, 1594, 1604, 1611, 161882, 1649, 1728, 183, 1845, 1848, 1852, 207, 2167, 2280, 22925, 22927, 2316, 23504, 23560, 23624, 23677, 246184, 2537, 2550, 25793, 25824, 25937, 2621, 26472, 26508, 26524, 26973, 2719, 27344, 2764, 2810, 2873, 2910…
GO:0003151	outflow tract morphogenesis	GOBP	55	-0.053299	0.718038	0.000147831	0.00152779	up in HPV(-)	10512, 1482, 161882, 182, 2303, 2535, 26508, 3091, 4488, 4734, 55742, 5914, 6423, 6664, 6899, 6909, 6926, 7057, 7291, 7474, 7481
GO:0042492	gamma-delta T cell differentiation	GOBP	10	0.0576065	1.43047	0.000149182	0.00153548	up in HPV(+)	3071, 55340, 6097, 6776, 6850, 9580
GO:0061024	membrane organization	GOBP	754	-0.0177041	0.895813	0.000148939	0.00153548	up in HPV(-)	10052, 10059, 10105, 10133, 10211, 10345, 10484, 10490, 10493, 10627, 10783, 10952, 10959, 10971, 10972, 10979, 11031, 11187, 11224, 11267, 1174, 1213, 1289, 1314, 1315, 131578, 148229, 152503, 155382, 1861, 19, 196527, 2010, 207, 2119, 2150, 2181, 2197, 2258, 23114, 2316, 23241, 23250, 23399, 23433, 23478, 23480, 23499, 23682, 23788, 24, 2495, 255027, 257364, 26154, 2621, 26509, 26519, 26520, 26…
GO:0014002	astrocyte development	GOBP	13	-0.0844835	0.591536	0.000149564	0.00153629	up in HPV(-)	10100, 1021, 10319, 183, 3913, 5354, 5454
GO:0032410	negative regulation of transporter activity	GOBP	34	-0.0627912	0.676906	0.000154006	0.00157553	up in HPV(-)	10105, 10345, 10681, 183, 51719, 5350, 54602, 6588, 6622, 6717, 7291, 817, 845, 859, 88, 9446
GO:0043486	histone exchange	GOBP	25	0.0479948	1.34752	0.000153696	0.00157553	up in HPV(+)	23421, 387103, 4678, 50511, 57082, 5928, 5931, 64105, 64946, 79172, 79682, 81611
GO:0001938	positive regulation of endothelial cell proliferation	GOBP	59	-0.0518428	0.724566	0.000155213	0.00158467	up in HPV(-)	10016, 1012, 10344, 207, 2152, 3091, 3164, 3690, 383, 51162, 5155, 5365, 5578, 57521, 650, 652, 7472, 7474, 7857, 858, 8828, 8829
GO:1902105	regulation of leukocyte differentiation	GOBP	182	0.0279829	1.18994	0.000156619	0.00159581	up in HPV(+)	101, 1029, 10859, 11006, 1230, 133522, 140685, 1435, 146206, 1493, 150372, 22806, 2302, 2323, 28959, 3059, 3071, 3108, 3111, 324, 3398, 3458, 355, 3559, 3574, 3593, 3594, 3600, 3635, 3659, 3662, 3718, 4067, 4179, 4254, 4602, 50943, 51561, 54440, 54997, 55340, 55365, 5777, 6097, 6348, 6363, 6776, 6850, 695, 7098, 7124, 714, 7292, 7305, 7535, 814, 841, 84433, 8456, 84807, 8546, 8737, 8876, 914, 929…
GO:1903115	regulation of actin filament-based movement	GOBP	39	-0.059897	0.689191	0.00015804	0.00160706	up in HPV(-)	10052, 23630, 2626, 2697, 3728, 3753, 477, 5350, 55800, 6324, 6327, 6330, 6331, 6640, 6717, 7134, 817, 859
GO:0007044	cell-substrate junction assembly	GOBP	69	-0.0488839	0.738013	0.000158986	0.00161221	up in HPV(-)	10395, 10979, 1308, 1613, 1946, 2335, 23499, 29984, 347, 3655, 3678, 3690, 3861, 3909, 3915, 3918, 4323, 5339, 5796, 5829, 6281, 6422, 7057, 7070, 7205, 87, 88, 9270, 977
GO:2000027	regulation of organ morphogenesis	GOBP	140	-0.037027	0.794448	0.000159184	0.00161221	up in HPV(-)	11331, 183, 1906, 1909, 2118, 2119, 22943, 2303, 23213, 2535, 2668, 2719, 3207, 3217, 3227, 3237, 3728, 3976, 3987, 4233, 4609, 51339, 5154, 5447, 54829, 55679, 5754, 58524, 6422, 6423, 650, 652, 6591, 6608, 6899, 6909, 7040, 7291, 7472, 7474, 7475, 80326, 84133, 85407, 859, 860, 9241, 9313
GO:0072001	renal system development	GOBP	239	-0.0295072	0.832455	0.000159775	0.00161497	up in HPV(-)	10272, 10413, 10972, 116039, 123016, 1282, 1523, 153572, 170690, 182, 183, 185, 1909, 201163, 2018, 2028, 2200, 2303, 23213, 25937, 2650, 26508, 2668, 27130, 2719, 2736, 282679, 28514, 3207, 3217, 3227, 3237, 3399, 3655, 38, 3913, 3976, 4358, 4609, 4811, 4953, 5125, 5154, 5155, 5159, 5314, 55083, 55959, 57616, 59, 5914, 5950, 6299, 6422, 650, 652, 6608, 6664, 7040, 7046, 7474, 7475, 7477, 7481, 7…
GO:0007281	germ cell development	GOBP	141	0.0303987	1.20794	0.000160761	0.0016217	up in HPV(+)	10522, 1080, 10919, 11144, 11218, 124626, 150365, 163589, 2176, 2185, 2475, 259266, 26271, 268, 29118, 3148, 347732, 3622, 3815, 4292, 4436, 4880, 4948, 50511, 51087, 51361, 55124, 55342, 55818, 56853, 57082, 596, 7110, 7852, 83983, 84225, 85315, 90780, 9148, 9576, 9665, 9757, 9985
GO:0003208	cardiac ventricle morphogenesis	GOBP	55	-0.0530009	0.71937	0.000165874	0.00166664	up in HPV(-)	10512, 1301, 1482, 182, 2280, 2303, 2626, 26508, 3084, 3091, 4624, 4625, 4633, 4634, 6423, 6604, 6664, 7134, 7135, 7137, 7139, 7168
GO:0006334	nucleosome assembly	GOBP	64	0.0382515	1.26835	0.000165795	0.00166664	up in HPV(+)	10036, 23421, 3148, 387103, 4171, 4676, 4678, 50809, 55723, 57082, 5928, 5931, 64061, 64105, 64946, 79172, 79682, 8208, 8970
GO:0034080	CENP-A containing nucleosome assembly	GOBP	20	0.050115	1.3654	0.000172375	0.00172511	up in HPV(+)	23421, 387103, 57082, 5928, 5931, 64105, 64946, 79172, 79682
GO:0061641	CENP-A containing chromatin organization	GOBP	20	0.050115	1.3654	0.000172375	0.00172511	up in HPV(+)	23421, 387103, 57082, 5928, 5931, 64105, 64946, 79172, 79682
GO:0006457	protein folding	GOBP	192	-0.032238	0.818447	0.000176505	0.00176296	up in HPV(-)	10049, 10105, 10130, 10294, 10381, 10471, 10574, 10575, 10576, 10808, 10954, 11328, 1410, 146862, 16, 1861, 2280, 2286, 2288, 22948, 23071, 23184, 25822, 26973, 27000, 2923, 3300, 3309, 3312, 3320, 3326, 3329, 3690, 391634, 5034, 51645, 51726, 5202, 5203, 5479, 55033, 5768, 60, 60681, 64175, 6767, 6950, 7184, 7203, 7277, 7280, 7846, 80273, 81562, 84617, 84790, 8877, 908, 9529, 9532, 9601
GO:0002286	T cell activation involved in immune response	GOBP	53	0.0400427	1.28255	0.000180344	0.00179776	up in HPV(+)	10538, 10859, 3109, 3458, 3593, 3594, 3662, 3683, 3718, 4179, 4602, 51561, 5734, 5971, 602, 6097, 6363, 64218, 7157, 7292, 8320, 911, 942
GO:0007276	gamete generation	GOBP	395	0.020947	1.13903	0.000181052	0.00180127	up in HPV(+)	10018, 10149, 10406, 10420, 10461, 10522, 10656, 10693, 1080, 10863, 10919, 10983, 11022, 11063, 11113, 11144, 11218, 122402, 124626, 1268, 139886, 143689, 148327, 150365, 1512, 162655, 163589, 166378, 1788, 1869, 2176, 2177, 2185, 2302, 23411, 23598, 2475, 259266, 26271, 268, 2879, 28981, 29118, 29127, 30812, 3148, 3248, 347732, 353189, 3622, 3633, 3815, 400629, 4292, 4436, 4485, 4880, 4948, 505…
GO:0065004	protein-DNA complex assembly	GOBP	97	0.0338689	1.23427	0.000187297	0.00185975	up in HPV(+)	10036, 1060, 1063, 23126, 23421, 3070, 3148, 387103, 4171, 4676, 4678, 50809, 55723, 57082, 5928, 5931, 6118, 64061, 64105, 64946, 7480, 79172, 79682, 8208, 8554, 8970
GO:0006929	substrate-dependent cell migration	GOBP	22	-0.0715142	0.641188	0.000190699	0.00188982	up in HPV(-)	10371, 22801, 4628, 4983, 51330, 5155, 6386, 6591, 7424, 8828, 8829, 9270
GO:0006029	proteoglycan metabolic process	GOBP	82	-0.0453447	0.754425	0.000192195	0.00190093	up in HPV(-)	10082, 10090, 1280, 1301, 1462, 1464, 2131, 2132, 2137, 222537, 22856, 2300, 23213, 256691, 266722, 2719, 2817, 3073, 3340, 3423, 50515, 50859, 54480, 5467, 55454, 55959, 56548, 633, 6383, 650, 79586, 81792, 92126, 9469
GO:0071824	protein-DNA complex subunit organization	GOBP	117	0.0319611	1.21973	0.000193069	0.00190585	up in HPV(+)	10036, 1060, 1063, 196528, 23126, 23421, 29072, 3070, 3148, 387103, 4171, 4676, 4678, 50511, 50809, 55723, 57082, 5928, 5931, 6118, 64061, 64105, 64946, 6597, 6599, 6601, 7480, 79172, 79682, 81611, 8208, 8289, 8554, 8970
GO:0010470	regulation of gastrulation	GOBP	25	-0.0686154	0.652843	0.000196557	0.0019365	up in HPV(-)	116039, 1289, 1290, 1848, 22943, 3170, 6423, 7050, 91663
GO:0036037	CD8-positive, alpha-beta T cell activation	GOBP	10	0.057123	1.42618	0.000199492	0.0019616	up in HPV(+)	10859, 3071, 3458, 3659, 5075, 596, 6304, 8320, 944
GO:0050857	positive regulation of antigen receptor-mediated signaling pathway	GOBP	13	0.0543346	1.40168	0.000202056	0.00197913	up in HPV(+)	1236, 150372, 4067, 50852, 5579
GO:0060346	bone trabecula formation	GOBP	10	-0.0899322	0.571842	0.000202029	0.00197913	up in HPV(-)	1277, 2201, 4313, 4488, 6422
GO:2000379	positive regulation of reactive oxygen species metabolic process	GOBP	34	-0.0618665	0.680807	0.000212678	0.00207915	up in HPV(-)	140823, 183, 185, 2150, 2950, 50507, 5155, 5159, 55022, 6622, 7040, 7048, 7057, 79400, 948
GO:0001776	leukocyte homeostasis	GOBP	64	0.0378344	1.26507	0.000217033	0.00211764	up in HPV(+)	10018, 10673, 11151, 115650, 159296, 2207, 23495, 27040, 30061, 3071, 3458, 355, 3551, 3559, 3718, 4067, 4254, 50943, 5142, 5366, 55340, 596, 6776, 836, 8456, 972
GO:0060393	regulation of pathway-restricted SMAD protein phosphorylation	GOBP	33	-0.0623875	0.678607	0.000219822	0.00214073	up in HPV(-)	11171, 1460, 22943, 3624, 392255, 56937, 650, 652, 7040, 7046, 90, 9241
GO:0045597	positive regulation of cell differentiation	GOBP	516	-0.0204945	0.880412	0.000221233	0.00215034	up in HPV(-)	100, 1000, 10096, 10109, 1013, 10494, 1051, 11197, 1192, 1277, 133, 1437, 147040, 1482, 1490, 150572, 152, 1523, 1594, 169200, 1749, 1789, 182, 183, 185, 1948, 2043, 2048, 207, 2119, 2201, 22938, 23051, 2335, 23363, 23529, 252995, 2547, 25805, 25819, 25937, 2621, 2624, 2626, 26508, 2668, 2736, 274, 2778, 2810, 2817, 283149, 3084, 3091, 3170, 3207, 3237, 341676, 3486, 3491, 3569, 3570, 3624, 39225…
GO:0043086	negative regulation of catalytic activity	GOBP	616	-0.0188551	0.889428	0.000230323	0.0022344	up in HPV(-)	10049, 10105, 10188, 10197, 10213, 10959, 11009, 11072, 11142, 114794, 116154, 12, 128488, 132864, 135228, 1410, 1471, 1474, 150290, 151242, 1594, 1604, 1728, 183, 1845, 1848, 1852, 207, 2167, 2280, 22925, 23504, 23624, 23677, 246184, 2537, 2550, 25793, 25824, 25937, 2621, 26472, 26524, 26973, 2719, 27344, 2764, 2810, 2873, 29108, 2950, 302, 304, 306, 307, 308, 3164, 3170, 3265, 334, 340267, 3434…
GO:0048736	appendage development	GOBP	147	-0.0355097	0.801974	0.000231286	0.00223518	up in HPV(-)	10512, 116039, 1280, 1311, 1749, 2019, 2201, 221833, 22943, 2697, 2719, 2736, 2768, 2778, 3207, 3209, 3227, 3229, 3235, 3236, 3237, 3655, 4010, 4488, 4621, 50515, 5066, 5125, 51450, 55636, 56603, 57167, 578, 5914, 60529, 6299, 64093, 6423, 652, 658, 6664, 6909, 6926, 7291, 7473, 7474, 7476, 79659, 860, 9241
GO:0060173	limb development	GOBP	147	-0.0355097	0.801974	0.000231286	0.00223518	up in HPV(-)	10512, 116039, 1280, 1311, 1749, 2019, 2201, 221833, 22943, 2697, 2719, 2736, 2768, 2778, 3207, 3209, 3227, 3229, 3235, 3236, 3237, 3655, 4010, 4488, 4621, 50515, 5066, 5125, 51450, 55636, 56603, 57167, 578, 5914, 60529, 6299, 64093, 6423, 652, 658, 6664, 6909, 6926, 7291, 7473, 7474, 7476, 79659, 860, 9241
GO:0048537	mucosal-associated lymphoid tissue development	GOBP	12	0.0549245	1.40682	0.000234485	0.00225748	up in HPV(+)	159296, 3398, 6097, 6776, 785
GO:0048541	Peyer's patch development	GOBP	12	0.0549245	1.40682	0.000234485	0.00225748	up in HPV(+)	159296, 3398, 6097, 6776, 785
GO:0043370	regulation of CD4-positive, alpha-beta T cell differentiation	GOBP	25	0.0472834	1.34158	0.00023943	0.00230071	up in HPV(+)	3071, 3593, 3594, 3662, 3718, 4602, 50943, 51561, 54440, 55340, 6363, 7292, 9308, 942
GO:0001101	response to acid chemical	GOBP	241	-0.0286613	0.836843	0.000241473	0.00231224	up in HPV(-)	1051, 1072, 10972, 1244, 1277, 1278, 1281, 1282, 1288, 1290, 1291, 1374, 1490, 16, 1645, 1646, 1789, 19, 1906, 197131, 205860, 22938, 22943, 23677, 26012, 27, 27429, 2778, 2934, 302, 3482, 3485, 3490, 3569, 383, 3843, 4313, 4314, 4803, 4830, 5154, 5155, 5159, 55004, 55022, 56034, 56603, 5743, 57521, 5754, 590, 5914, 5950, 5970, 6258, 6281, 6422, 6672, 6678, 6899, 7054, 7132, 7472, 7473, 7474, 747…
GO:0034728	nucleosome organization	GOBP	84	0.0349206	1.24237	0.000241543	0.00231224	up in HPV(+)	10036, 196528, 23421, 29072, 3148, 387103, 4171, 4676, 4678, 50511, 50809, 55723, 57082, 5928, 5931, 64061, 64105, 64946, 6597, 6599, 6601, 79172, 79682, 81611, 8208, 8289, 8970
GO:0086004	regulation of cardiac muscle cell contraction	GOBP	36	-0.0602576	0.687649	0.000247016	0.00236017	up in HPV(-)	10052, 23630, 2626, 2697, 3728, 3753, 477, 5350, 55800, 6324, 6327, 6330, 6331, 6640, 6717, 817, 859
GO:0070972	protein localization to endoplasmic reticulum	GOBP	126	-0.0375815	0.791715	0.000260277	0.00248219	up in HPV(-)	10134, 10945, 10952, 10956, 11014, 11015, 11224, 2197, 23478, 23480, 29082, 2923, 3309, 337867, 6123, 6132, 6134, 6136, 6137, 6143, 6155, 6167, 6169, 6170, 6173, 6181, 6185, 6187, 6204, 6217, 6227, 6230, 6231, 6729, 6730, 6734, 6747, 7095, 9409
GO:0051128	regulation of cellular component organization	GOBP	1470	-0.0126535	0.924376	0.000262763	0.00250119	up in HPV(-)	10049, 10059, 10071, 10095, 10096, 10105, 10109, 1012, 10128, 10188, 10324, 10344, 10371, 103910, 10395, 10411, 10435, 10458, 10467, 10493, 10494, 10505, 10602, 10627, 10630, 10634, 1072, 1073, 10769, 10783, 10787, 10810, 10938, 10962, 10971, 10979, 11007, 11037, 11075, 11076, 11171, 11202, 114299, 114793, 118987, 119, 1213, 121512, 122953, 1277, 1289, 131578, 1398, 1410, 1437, 1471, 147906, 1482…
GO:0090183	regulation of kidney development	GOBP	45	-0.0555914	0.707881	0.000265885	0.00252616	up in HPV(-)	10413, 183, 1909, 201163, 25937, 2668, 3217, 3976, 4609, 5154, 5155, 5159, 652, 6608, 7040, 9241
GO:0006338	chromatin remodeling	GOBP	107	0.0323118	1.22239	0.000273954	0.00259309	up in HPV(+)	1029, 11240, 114803, 2099, 23411, 23421, 3070, 3169, 387103, 4602, 4678, 473, 50511, 50943, 55193, 57082, 57492, 5928, 5931, 6304, 64105, 64946, 6595, 6597, 6599, 6601, 7175, 79172, 79682, 81611, 8289, 8850, 9757
GO:0006458	'de novo' protein folding	GOBP	50	-0.0534724	0.717265	0.000273708	0.00259309	up in HPV(-)	10381, 10471, 10574, 10575, 10576, 10808, 1861, 2280, 22948, 27000, 3312, 3329, 5202, 5203, 60, 6950, 7203, 7277, 7280, 7846, 84617, 84790, 8877, 908
GO:0040017	positive regulation of locomotion	GOBP	272	-0.0268842	0.846136	0.000284794	0.00269067	up in HPV(-)	10016, 1012, 10344, 10371, 10630, 1277, 131578, 14, 147372, 183, 1839, 1906, 1909, 207, 2149, 2150, 2152, 22800, 2303, 26012, 2621, 27286, 284114, 29108, 29984, 306, 3091, 3265, 3309, 338879, 3491, 3569, 3570, 3576, 3667, 3678, 3690, 3912, 4233, 4323, 4638, 4641, 50507, 5054, 5154, 5155, 5159, 5216, 5578, 5649, 5743, 59352, 6278, 6375, 650, 652, 6591, 6615, 6678, 7040, 7048, 7057, 708, 7205, 7291…
GO:0043129	surfactant homeostasis	GOBP	10	-0.088482	0.577018	0.000300924	0.00283776	up in HPV(-)	26154, 5744, 6441, 79888
GO:0006952	defense response	GOBP	1184	0.0130176	1.08426	0.000309126	0.00290969	up in HPV(+)	100049587, 10062, 10077, 101, 10125, 10163, 10219, 1027, 10318, 10326, 10333, 10437, 10462, 10475, 10537, 10538, 10628, 10663, 10800, 10859, 10906, 11074, 111, 11126, 11151, 112, 11262, 11277, 1139, 116, 116379, 116842, 117157, 118788, 1191, 1230, 1233, 1234, 1235, 1236, 1268, 1269, 127544, 134, 135, 1378, 1380, 140564, 143, 1435, 1436, 1441, 146433, 150372, 1520, 1524, 152831, 1536, 163351, 1646…
GO:0009719	response to endogenous stimulus	GOBP	1125	-0.0140599	0.916332	0.000311679	0.00292827	up in HPV(-)	100, 1012, 10411, 10458, 1051, 10634, 107, 1072, 10938, 10972, 10979, 11031, 11075, 11171, 11173, 113, 1244, 1277, 1278, 1280, 1281, 1282, 1284, 1288, 1290, 1291, 132864, 133, 135228, 1398, 1410, 143686, 1460, 1471, 1490, 1514, 1515, 1594, 16, 1604, 163732, 1645, 1646, 1723, 1728, 1749, 1789, 182, 1827, 1828, 1839, 1848, 1874, 19, 1906, 1909, 1950, 1961, 197131, 1981, 201163, 2019, 2069, 207, 218…
GO:0045109	intermediate filament organization	GOBP	12	-0.0838776	0.593768	0.00031259	0.0029314	up in HPV(-)	10049, 3857, 3861, 3872, 4534, 4741, 4747, 5317
GO:0009611	response to wounding	GOBP	803	-0.016335	0.903467	0.000320086	0.00299615	up in HPV(-)	100, 1001, 10398, 10411, 10487, 10544, 10627, 10630, 1072, 10894, 10938, 11009, 11069, 11202, 1192, 1277, 1278, 1281, 1289, 133, 135228, 136, 1398, 140885, 1471, 1490, 152, 1604, 1608, 160851, 161882, 1809, 183, 1839, 185, 1861, 1906, 1909, 1950, 196527, 2043, 2069, 207, 2149, 2150, 2151, 2152, 2167, 2171, 22927, 2303, 2316, 23186, 23189, 2335, 23428, 23499, 23657, 23764, 25807, 25828, 25833, 259…
GO:0006336	DNA replication-independent nucleosome assembly	GOBP	30	0.0449146	1.32197	0.000323247	0.0030146	up in HPV(+)	23421, 387103, 4678, 55723, 57082, 5928, 5931, 64105, 64946, 79172, 79682
GO:0034724	DNA replication-independent nucleosome organization	GOBP	30	0.0449146	1.32197	0.000323247	0.0030146	up in HPV(+)	23421, 387103, 4678, 55723, 57082, 5928, 5931, 64105, 64946, 79172, 79682
GO:0042730	fibrinolysis	GOBP	17	-0.0755137	0.625447	0.000331299	0.00308401	up in HPV(-)	2191, 302, 3848, 5054, 5328, 7057, 710
GO:0046637	regulation of alpha-beta T cell differentiation	GOBP	36	0.0429524	1.30595	0.000342509	0.0031825	up in HPV(+)	3071, 3593, 3594, 3662, 3718, 4602, 50943, 51561, 54440, 55340, 6363, 6850, 7292, 7535, 8546, 9308, 942
GO:0061436	establishment of skin barrier	GOBP	14	-0.0798645	0.608763	0.000344648	0.00319651	up in HPV(-)	2312, 242, 26154, 2810, 3848, 388698, 56603, 59344
GO:0035115	embryonic forelimb morphogenesis	GOBP	27	-0.0651989	0.666853	0.000346767	0.00321029	up in HPV(-)	116039, 2019, 3207, 3209, 3235, 3237, 4488, 60529, 6926, 7291, 7473, 7476, 860
GO:0016265	death	GOBP	1744	-0.0115271	0.930869	0.000347696	0.00321302	up in HPV(-)	100, 10016, 10049, 10059, 10105, 10133, 10134, 10197, 10202, 10213, 10227, 10342, 10371, 10395, 10413, 10438, 1051, 10514, 10528, 10553, 10617, 10625, 1072, 10749, 1075, 10758, 10769, 10783, 10787, 10804, 10884, 10904, 10913, 10922, 10962, 10971, 11009, 11202, 121512, 1280, 1311, 133, 133396, 1410, 1437, 1459, 146227, 1471, 1482, 1490, 151126, 1514, 1515, 155061, 158471, 16, 1611, 1613, 1639, 164…
GO:0050817	coagulation	GOBP	457	-0.0209937	0.877685	0.000348834	0.00321766	up in HPV(-)	10398, 10411, 10487, 10544, 10627, 10630, 1072, 10938, 11069, 1192, 1277, 1278, 1281, 1398, 140885, 152, 1608, 160851, 161882, 1906, 1950, 196527, 207, 2149, 2150, 2151, 2152, 222537, 22927, 2316, 23186, 2335, 23428, 23657, 23764, 26153, 2621, 2624, 2626, 2734, 2768, 2770, 2778, 286133, 2888, 2977, 30008, 302, 308, 30846, 3170, 3265, 3309, 3481, 351, 3569, 3655, 3678, 3690, 3705, 3797, 3831, 3845…
GO:0050878	regulation of body fluid levels	GOBP	552	-0.0192526	0.887233	0.000351005	0.0032318	up in HPV(-)	100, 10398, 10411, 10487, 10544, 10627, 10630, 1072, 10938, 11069, 1131, 1192, 1277, 1278, 1281, 1314, 1398, 140885, 152, 1608, 160851, 161882, 1723, 1906, 1950, 196527, 2030, 2048, 207, 2149, 2150, 2151, 2152, 22927, 2312, 2316, 23186, 2335, 23428, 23657, 23764, 242, 26153, 26154, 2621, 2624, 2626, 2697, 2734, 2768, 2770, 2778, 2810, 286133, 2888, 2977, 30008, 302, 308, 30846, 3091, 3170, 3265, …
GO:0097186	amelogenesis	GOBP	13	-0.0814979	0.602614	0.000355834	0.00327031	up in HPV(-)	3655, 4488, 56975, 64065, 6899, 9313, 9622
GO:0002377	immunoglobulin production	GOBP	69	0.0362454	1.25264	0.000362997	0.00332408	up in HPV(+)	10538, 10673, 2956, 30009, 3119, 3120, 3123, 3127, 3458, 355, 4292, 4436, 4437, 50943, 51237, 54440, 54900, 57379, 7124, 7186, 7292, 7293, 7374, 8741, 9156, 940, 9466, 951, 959
GO:0032320	positive regulation of Ras GTPase activity	GOBP	265	0.0233946	1.15649	0.000362552	0.00332408	up in HPV(+)	100271715, 10125, 1102, 11138, 115703, 116, 1236, 128239, 128272, 153020, 1794, 201627, 2146, 2185, 221178, 22898, 2302, 23092, 23179, 23263, 25780, 25894, 26084, 27237, 3071, 3357, 374403, 393, 440107, 50618, 50650, 51291, 55160, 55619, 55785, 55843, 57186, 57465, 57533, 57580, 57589, 57822, 6363, 64283, 64786, 64926, 6654, 7074, 7249, 7409, 79735, 79958, 79961, 83478, 8477, 8502, 8567, 9459, 96…
GO:0002920	regulation of humoral immune response	GOBP	33	0.0437365	1.31233	0.000364442	0.00333129	up in HPV(+)	1236, 1378, 2208, 2302, 4049, 4179, 5199, 55340, 5777, 7124, 718, 727, 730, 733, 951
GO:0034508	centromere complex assembly	GOBP	32	0.0440251	1.31469	0.000370028	0.00336413	up in HPV(+)	1060, 1063, 23126, 23421, 3070, 387103, 57082, 5928, 5931, 64105, 64946, 79172, 79682
GO:0043547	positive regulation of GTPase activity	GOBP	432	0.0193674	1.1279	0.000369415	0.00336413	up in HPV(+)	100271715, 10044, 10125, 10235, 10564, 10636, 10641, 1102, 11138, 115703, 116, 116986, 117289, 120892, 1236, 126006, 126432, 128239, 128272, 153020, 1794, 201627, 2146, 2185, 221178, 22898, 2302, 23041, 23092, 23179, 23263, 23362, 23526, 23527, 255520, 257106, 25780, 25894, 26084, 266747, 27128, 27237, 2776, 29127, 3071, 3268, 3357, 343578, 374403, 393, 397, 408, 440107, 50618, 50650, 51291, 5173…
GO:0050855	regulation of B cell receptor signaling pathway	GOBP	12	0.0541397	1.39998	0.000368958	0.00336413	up in HPV(+)	11314, 150372, 23228, 257144, 26191, 4067, 5579, 5777, 83416
GO:0008219	cell death	GOBP	1740	-0.0114756	0.931167	0.000374158	0.00339559	up in HPV(-)	100, 10016, 10049, 10059, 10105, 10133, 10134, 10197, 10202, 10213, 10227, 10342, 10371, 10395, 10413, 10438, 1051, 10514, 10528, 10553, 10617, 10625, 1072, 10749, 1075, 10758, 10769, 10783, 10787, 10804, 10884, 10904, 10913, 10922, 10962, 10971, 11009, 11202, 121512, 1280, 1311, 133, 133396, 1410, 1437, 1459, 146227, 1471, 1482, 1490, 151126, 1514, 1515, 155061, 158471, 16, 1611, 1613, 1639, 164…
GO:0007423	sensory organ development	GOBP	404	-0.0220847	0.871754	0.000376471	0.00340438	up in HPV(-)	10319, 10804, 11023, 116039, 123016, 124590, 1280, 1282, 1289, 1290, 1295, 1301, 1410, 145258, 1471, 1523, 1687, 1749, 182, 1906, 2048, 2070, 22931, 2295, 2303, 23657, 24147, 2535, 25806, 25987, 2624, 2637, 2697, 2736, 28514, 28996, 3091, 3198, 3209, 3229, 341640, 3490, 3624, 388552, 3913, 3982, 4010, 4081, 4358, 4628, 4771, 4810, 4909, 51384, 51450, 5154, 5159, 525, 5523, 55584, 55636, 56603, 57…
GO:0051443	positive regulation of ubiquitin-protein transferase activity	GOBP	83	-0.0434578	0.763324	0.000376186	0.00340438	up in HPV(-)	10197, 10213, 246184, 51529, 5682, 5684, 5687, 5688, 5689, 5691, 5693, 5695, 5700, 5701, 5702, 5705, 5706, 5707, 5708, 5709, 5713, 5715, 5717, 5718, 5719, 57761, 65018, 7316, 7332, 8312, 8454, 91947, 9491, 996
GO:0060444	branching involved in mammary gland duct morphogenesis	GOBP	26	-0.0656948	0.664801	0.000381314	0.00344202	up in HPV(-)	11331, 2118, 2119, 374, 4488, 6926, 7022, 7040, 7421, 7474, 859
GO:0048864	stem cell development	GOBP	224	-0.0286988	0.836648	0.00038634	0.00348119	up in HPV(-)	1000, 10371, 10413, 10512, 1072, 11171, 1277, 145258, 147906, 182, 1906, 1909, 1942, 1947, 2295, 2303, 2316, 25805, 25937, 2624, 2637, 26508, 2668, 283149, 28514, 3084, 3091, 3170, 359845, 3976, 4017, 4488, 5077, 51384, 51586, 54949, 57142, 57167, 58495, 60485, 6343, 6422, 6423, 650, 6591, 6608, 6615, 6664, 6886, 6899, 6926, 7022, 7040, 7041, 7046, 7071, 7080, 7291, 7472, 7474, 7476, 79576, 8091,…
GO:0033561	regulation of water loss via skin	GOBP	17	-0.0749346	0.627702	0.000391949	0.00352545	up in HPV(-)	2312, 242, 26154, 2810, 3848, 388698, 56603, 59344, 6722
GO:0048588	developmental cell growth	GOBP	93	-0.0413941	0.773176	0.000400964	0.00359378	up in HPV(-)	10371, 10505, 150465, 183, 2016, 2258, 23242, 2335, 2626, 351, 3913, 3984, 4131, 4137, 4692, 4803, 5048, 51083, 51330, 55558, 57142, 57611, 6608, 7473, 7474, 81565, 859, 8828, 8829, 8851, 91584, 9201, 9472, 9625
GO:0051301	cell division	GOBP	650	0.0163399	1.10688	0.000400859	0.00359378	up in HPV(+)	10051, 10112, 1017, 10270, 10274, 1029, 10309, 10388, 10403, 10472, 10592, 1060, 10600, 10628, 1063, 10636, 10734, 10907, 10919, 11004, 11022, 11040, 11078, 11113, 11130, 11144, 115106, 117583, 121441, 122402, 143689, 144455, 146909, 147841, 148479, 150365, 151246, 151648, 152185, 157313, 162655, 1731, 2175, 2177, 220134, 2247, 2261, 23047, 23113, 23122, 23126, 23137, 23157, 23244, 23331, 23354, …
GO:0007154	cell communication	GOBP	4490	-0.00815736	0.950569	0.000401798	0.00359489	up in HPV(-)	100, 1000, 1001, 10016, 10045, 100506013, 10052, 10059, 1006, 10060, 10082, 10089, 10096, 10100, 10105, 10109, 1012, 10130, 10133, 10134, 10135, 10175, 10188, 10197, 1021, 10211, 10213, 1022, 10252, 10272, 10342, 10344, 10345, 10371, 10395, 10410, 10411, 10413, 10458, 10468, 10487, 10494, 10505, 10514, 10525, 10527, 10555, 10602, 10617, 10625, 10630, 10631, 10634, 10681, 107, 1072, 10725, 1075, 1…
GO:0048562	embryonic organ morphogenesis	GOBP	246	-0.0274621	0.843103	0.000402566	0.00359541	up in HPV(-)	10413, 10787, 10804, 116039, 124590, 1280, 129880, 1301, 145258, 1482, 1746, 1749, 1906, 1942, 2048, 2070, 2295, 2303, 2535, 25806, 2624, 2626, 2637, 2697, 2735, 2736, 2778, 28514, 28996, 3091, 3198, 3207, 3215, 3216, 3217, 3218, 3227, 3235, 3236, 3237, 3340, 4188, 4323, 4325, 50515, 51384, 51450, 525, 55036, 55584, 55636, 5754, 58495, 5950, 60529, 6169, 6299, 652, 6608, 6664, 668, 6722, 6899, 69…
GO:0010632	regulation of epithelial cell migration	GOBP	117	-0.0376823	0.791219	0.000409076	0.00362795	up in HPV(-)	10016, 10371, 11171, 14, 1460, 147372, 183, 1839, 1906, 1942, 207, 2303, 23499, 27286, 306, 3091, 3690, 4163, 4233, 5155, 5216, 5217, 5578, 5743, 5801, 652, 6672, 6678, 7040, 7048, 7057, 7424, 7474, 8828, 8829, 9270, 949, 9564
GO:0035107	appendage morphogenesis	GOBP	129	-0.0362019	0.798532	0.000407868	0.00362795	up in HPV(-)	10512, 116039, 1280, 1749, 2019, 2201, 221833, 22943, 2697, 2719, 2736, 2768, 2778, 3207, 3209, 3227, 3235, 3236, 3237, 4010, 4488, 4621, 50515, 5125, 51450, 55636, 56603, 57167, 578, 60529, 6299, 6423, 652, 658, 6664, 6909, 6926, 7291, 7473, 7474, 7476, 79659, 860, 9241
GO:0035108	limb morphogenesis	GOBP	129	-0.0362019	0.798532	0.000407868	0.00362795	up in HPV(-)	10512, 116039, 1280, 1749, 2019, 2201, 221833, 22943, 2697, 2719, 2736, 2768, 2778, 3207, 3209, 3227, 3235, 3236, 3237, 4010, 4488, 4621, 50515, 5125, 51450, 55636, 56603, 57167, 578, 60529, 6299, 6423, 652, 658, 6664, 6909, 6926, 7291, 7473, 7474, 7476, 79659, 860, 9241
GO:0050854	regulation of antigen receptor-mediated signaling pathway	GOBP	34	0.043236	1.30826	0.000408523	0.00362795	up in HPV(+)	11314, 1236, 150372, 23228, 257144, 26191, 4067, 50852, 53347, 5579, 5777, 5795, 83416
GO:0007596	blood coagulation	GOBP	454	-0.0208122	0.878675	0.000410995	0.0036386	up in HPV(-)	10398, 10411, 10487, 10544, 10627, 10630, 1072, 10938, 11069, 1192, 1277, 1278, 1281, 1398, 140885, 152, 1608, 160851, 161882, 1906, 1950, 196527, 207, 2149, 2150, 2151, 2152, 22927, 2316, 23186, 2335, 23428, 23657, 23764, 26153, 2621, 2624, 2626, 2734, 2768, 2770, 2778, 286133, 2888, 2977, 30008, 302, 308, 30846, 3170, 3265, 3309, 3481, 351, 3569, 3655, 3678, 3690, 3705, 3797, 3831, 3845, 3848, …
GO:0042254	ribosome biogenesis	GOBP	163	-0.0327721	0.815735	0.000415056	0.00366814	up in HPV(-)	10200, 10360, 10436, 10438, 10528, 10813, 10969, 114049, 118460, 124995, 1736, 23212, 23246, 23560, 26574, 29102, 345630, 3692, 404672, 4809, 4839, 5036, 51013, 51077, 51096, 51119, 51154, 51187, 51202, 51388, 54475, 54512, 55299, 55505, 55636, 55720, 5901, 6169, 6217, 6227, 6230, 64282, 705, 708, 84916, 88745, 9136, 92856, 9775, 9790
GO:0007512	adult heart development	GOBP	14	-0.0791026	0.611652	0.000426355	0.00376143	up in HPV(-)	1482, 2697, 4331, 4624, 4625, 4628, 55636, 7273, 8557
GO:0002706	regulation of lymphocyte mediated immunity	GOBP	83	0.0341154	1.23617	0.000428836	0.00377674	up in HPV(+)	10859, 117157, 1378, 2207, 2208, 2209, 2302, 259197, 30009, 3458, 3593, 3594, 3902, 4049, 4068, 409, 50943, 51561, 54440, 55340, 5777, 6693, 6776, 695, 7124, 718, 7186, 7292, 8741, 940, 9466
GO:0060420	regulation of heart growth	GOBP	32	-0.0609713	0.684606	0.000430637	0.00378601	up in HPV(-)	1482, 1848, 2626, 2697, 3084, 4624, 5950, 60485, 6909, 7048, 7472, 859, 9241, 9472
GO:0050886	endocrine process	GOBP	52	-0.0513801	0.726652	0.000439981	0.00386147	up in HPV(-)	10699, 183, 185, 1906, 2028, 2149, 2150, 290, 3291, 3623, 3624, 3625, 51083, 5125, 6926, 90226, 91608
GO:0042445	hormone metabolic process	GOBP	132	-0.0356725	0.801163	0.000441967	0.00386549	up in HPV(-)	10202, 10699, 1312, 133, 145226, 1645, 1646, 1734, 1735, 183, 2028, 2230, 231, 27122, 27344, 290, 3091, 3292, 3481, 4803, 5045, 51083, 51109, 51144, 5122, 5125, 5126, 5447, 5653, 56603, 5950, 650, 7173, 83875, 8614, 8912, 9159, 949, 9718
GO:0048875	chemical homeostasis within a tissue	GOBP	12	-0.0826139	0.59845	0.000441277	0.00386549	up in HPV(-)	26154, 5744, 6441, 79888, 9455
GO:0001822	kidney development	GOBP	225	-0.0283425	0.838502	0.000450744	0.00393546	up in HPV(-)	10272, 10413, 10972, 116039, 1523, 153572, 170690, 182, 183, 185, 1909, 201163, 2028, 2200, 2303, 23213, 25937, 2650, 26508, 2668, 27130, 2719, 2736, 282679, 28514, 3207, 3217, 3227, 3237, 3399, 38, 3913, 3976, 4358, 4609, 4811, 4953, 5125, 5154, 5155, 5159, 5314, 55083, 55959, 57616, 59, 5914, 6299, 6422, 650, 652, 6608, 6664, 7040, 7046, 7475, 7477, 7481, 79192, 793, 8829, 9241, 9244, 9510, 960
GO:0010469	regulation of receptor activity	GOBP	77	-0.0442448	0.759599	0.000453947	0.00395661	up in HPV(-)	149111, 152, 1950, 2069, 23624, 255324, 26508, 27092, 334, 3481, 351, 5054, 50944, 5328, 5649, 58533, 636, 6464, 7039, 859, 88
GO:0002292	T cell differentiation involved in immune response	GOBP	36	0.042464	1.30199	0.000455451	0.00396289	up in HPV(+)	10538, 3458, 3593, 3594, 3662, 3718, 4179, 4602, 51561, 5734, 5971, 602, 6097, 6363, 64218, 7292, 8320, 942
GO:0032633	interleukin-4 production	GOBP	27	0.0453488	1.32555	0.000469603	0.00407903	up in HPV(+)	3123, 3127, 3662, 3702, 4853, 50943, 54440, 7292, 7294, 7356, 916, 9308, 942
GO:0007599	hemostasis	GOBP	459	-0.0204856	0.880461	0.000476745	0.00413396	up in HPV(-)	10398, 10411, 10487, 10544, 10627, 10630, 1072, 10938, 11069, 1192, 1277, 1278, 1281, 1398, 140885, 152, 1608, 160851, 161882, 1906, 1950, 196527, 207, 2149, 2150, 2151, 2152, 22927, 2316, 23186, 2335, 23428, 23657, 23764, 26153, 2621, 2624, 2626, 2734, 2768, 2770, 2778, 286133, 2888, 2977, 30008, 302, 308, 30846, 3170, 3265, 3309, 3481, 351, 3569, 3655, 3678, 3690, 3705, 3797, 3831, 3845, 3848, …
GO:0007431	salivary gland development	GOBP	37	-0.0577043	0.698647	0.000478788	0.00414459	up in HPV(-)	10371, 10512, 10913, 1471, 1896, 29842, 3569, 4233, 5154, 5155, 6591, 7040, 7052, 8829
GO:0009952	anterior/posterior pattern specification	GOBP	179	-0.031164	0.823928	0.000482936	0.00417336	up in HPV(-)	10512, 10655, 10787, 1649, 2018, 2019, 22943, 2303, 23237, 23242, 23509, 2626, 2637, 2719, 28514, 28996, 3170, 3198, 3207, 3215, 3216, 3217, 3218, 3227, 3229, 3235, 3236, 3237, 3955, 4488, 4618, 5077, 5125, 5523, 60529, 6422, 6423, 650, 652, 6608, 6722, 6899, 6926, 7046, 7273, 7472, 7473, 7474, 79971, 8312, 84667, 85407, 8557, 9096, 9241
GO:0023014	signal transduction by phosphorylation	GOBP	554	-0.0187747	0.889872	0.000484277	0.00417782	up in HPV(-)	1000, 10045, 11072, 11183, 112464, 133396, 136, 1398, 1410, 1464, 1490, 150290, 152, 183, 1845, 1848, 1852, 1906, 1909, 1942, 1950, 201163, 203447, 2043, 207, 2149, 2150, 2258, 2259, 2305, 2308, 23286, 23624, 238, 242, 255324, 25807, 2621, 284996, 2873, 28996, 29108, 2914, 2950, 29937, 3084, 3265, 3340, 3358, 3481, 3486, 3487, 3491, 3569, 3570, 3589, 3606, 3654, 3845, 3976, 4055, 4188, 4205, 4233…
GO:0006886	intracellular protein transport	GOBP	745	-0.0163879	0.90317	0.000487014	0.00419428	up in HPV(-)	10016, 10043, 10133, 10134, 10204, 10440, 10452, 10484, 10490, 10527, 10627, 10651, 1072, 10913, 10938, 10945, 10952, 10953, 10956, 10959, 10971, 10972, 11014, 11031, 11037, 11142, 11224, 116988, 1174, 1213, 1314, 1315, 144165, 147906, 1678, 183, 1896, 1950, 1984, 2010, 207, 2149, 2181, 2197, 2316, 23189, 23203, 23214, 23241, 23379, 23478, 23480, 23499, 23625, 257364, 25793, 25805, 25937, 2621, 2…
GO:0010646	regulation of cell communication	GOBP	2298	-0.0100325	0.939556	0.000491235	0.00422346	up in HPV(-)	100, 1000, 1001, 10016, 10045, 10059, 10105, 1012, 10134, 10197, 10211, 10252, 10272, 10342, 10344, 10345, 10395, 10411, 10413, 10435, 10458, 10468, 10555, 10617, 10625, 10631, 10681, 10725, 1075, 10758, 10769, 10783, 10809, 10913, 10920, 10962, 10971, 11009, 11033, 11069, 11072, 11171, 11183, 112464, 1131, 11331, 115265, 115557, 116988, 121512, 123920, 125058, 1258, 1277, 1280, 1281, 133, 133396…
GO:0046640	regulation of alpha-beta T cell proliferation	GOBP	19	0.0488382	1.35461	0.000500389	0.00429487	up in HPV(+)	10148, 151888, 3593, 3659, 51561, 6850, 7292, 729230, 7535, 8764, 916, 940
GO:0007435	salivary gland morphogenesis	GOBP	33	-0.0597418	0.689856	0.00052	0.00445564	up in HPV(-)	10371, 10512, 10913, 1896, 3569, 4233, 5154, 5155, 6591, 7040, 7052, 8829
GO:0031954	positive regulation of protein autophosphorylation	GOBP	14	-0.0783054	0.61469	0.0005299	0.0045328	up in HPV(-)	4803, 5154, 5155, 7424
GO:0000165	MAPK cascade	GOBP	532	-0.0189618	0.888838	0.00054324	0.00463907	up in HPV(-)	1000, 10045, 11072, 11183, 112464, 133396, 136, 1398, 1410, 1464, 1490, 150290, 152, 183, 1845, 1848, 1852, 1906, 1909, 1942, 1950, 201163, 203447, 2043, 207, 2149, 2150, 2258, 2259, 2305, 2308, 23286, 23624, 238, 242, 255324, 25807, 2621, 284996, 2873, 28996, 29108, 2914, 2950, 29937, 3084, 3265, 3340, 3358, 3481, 3486, 3487, 3491, 3569, 3570, 3589, 3606, 3654, 3845, 3976, 4055, 4188, 4205, 4233…
GO:1903321	negative regulation of protein modification by small protein conjugation or removal	GOBP	114	-0.0373209	0.792998	0.000560041	0.00477449	up in HPV(-)	10196, 10197, 10213, 23551, 23560, 246184, 2729, 3300, 3984, 51529, 55611, 5682, 5684, 5687, 5688, 5689, 5691, 5693, 5695, 5700, 5701, 5702, 5705, 5706, 5707, 5708, 5709, 5713, 5715, 5717, 5718, 5719, 64359, 7316, 857, 9491, 9529, 9636, 9683, 996
GO:0032413	negative regulation of ion transmembrane transporter activity	GOBP	27	-0.0635777	0.673606	0.000569067	0.00484328	up in HPV(-)	10345, 10681, 183, 51719, 5350, 6588, 6717, 817, 845, 859, 88, 9446
GO:2001257	regulation of cation channel activity	GOBP	53	-0.0502623	0.731718	0.000570434	0.00484677	up in HPV(-)	10345, 10681, 1482, 2280, 23630, 3270, 3753, 51083, 5350, 57158, 57338, 6271, 6717, 6786, 79026, 817, 845, 84766, 9446, 9472
GO:0010941	regulation of cell death	GOBP	1200	-0.0130395	0.922161	0.000578501	0.00489439	up in HPV(-)	100, 10016, 10049, 10059, 10105, 10134, 10197, 10202, 10213, 10395, 10413, 1051, 10553, 10617, 10625, 1072, 1075, 10769, 10962, 10971, 11009, 121512, 1280, 1311, 133, 133396, 1410, 1437, 1471, 1482, 1490, 155061, 16, 1611, 1613, 1649, 1687, 1723, 1728, 1745, 183, 1848, 1906, 1909, 1917, 1961, 196527, 201163, 2017, 207, 2149, 2152, 2191, 2274, 22822, 2303, 2308, 23365, 23529, 23532, 23786, 238, 25…
GO:0033077	T cell differentiation in thymus	GOBP	69	0.0354583	1.24652	0.00057731	0.00489439	up in HPV(+)	101, 1029, 1236, 1794, 2302, 3108, 324, 355, 50943, 596, 6097, 6693, 6776, 7157, 7535, 814, 84433, 8456, 84807, 8876, 915, 916, 940, 972
GO:0060445	branching involved in salivary gland morphogenesis	GOBP	23	-0.0669145	0.659781	0.000578937	0.00489439	up in HPV(-)	10371, 10512, 3569, 4233, 5154, 5155, 6591, 7052, 8829
GO:0010033	response to organic substance	GOBP	2029	-0.0103773	0.937544	0.000602632	0.00508622	up in HPV(-)	100, 10016, 10096, 1012, 10130, 10345, 10410, 10411, 10458, 1051, 10525, 1053, 10555, 10634, 107, 1072, 1075, 10808, 10897, 10938, 10954, 10972, 10979, 11009, 11015, 11031, 11075, 11171, 11173, 113, 121512, 1244, 1277, 1278, 1280, 1281, 1282, 1284, 1288, 1290, 1291, 1292, 1312, 132864, 133, 133396, 135228, 1374, 1398, 1410, 143686, 1437, 1460, 1471, 147372, 1490, 1514, 1515, 1594, 16, 1604, 1613,…
GO:0006289	nucleotide-excision repair	GOBP	79	0.0340185	1.23542	0.000606637	0.00509454	up in HPV(+)	10714, 11284, 1643, 2176, 22909, 23411, 3150, 340533, 3978, 4968, 5111, 51426, 5424, 5426, 5427, 55247, 5983, 5984, 5985, 6118, 7157, 7508
GO:0034332	adherens junction organization	GOBP	94	-0.0401602	0.779128	0.000605436	0.00509454	up in HPV(-)	1000, 1001, 1002, 1006, 1009, 1012, 1013, 10395, 10979, 1613, 1946, 23499, 29984, 347, 3728, 4323, 5796, 5817, 5829, 60, 6281, 6422, 7057, 7070, 71, 7205, 7414, 87, 88, 9253, 9270
GO:0060307	regulation of ventricular cardiac muscle cell membrane repolarization	GOBP	11	-0.0834833	0.595225	0.000605964	0.00509454	up in HPV(-)	23630, 2697, 3753, 6324, 6330, 6331, 6640, 859
GO:0044802	single-organism membrane organization	GOBP	619	-0.0175075	0.896908	0.000620823	0.00520504	up in HPV(-)	10059, 10105, 10133, 10211, 10345, 10484, 10493, 10627, 10783, 10952, 10959, 10971, 10972, 10979, 11031, 11187, 11224, 1213, 1289, 1314, 1315, 131578, 148229, 1861, 19, 196527, 2010, 207, 2119, 2181, 2197, 2258, 23114, 2316, 23241, 23250, 23399, 23433, 23478, 23480, 23499, 23682, 23788, 24, 255027, 257364, 26154, 2621, 26509, 26519, 26520, 2664, 2668, 27230, 2810, 284114, 286, 29082, 29763, 29928…
GO:0048872	homeostasis of number of cells	GOBP	187	0.02569	1.1731	0.000624395	0.00522634	up in HPV(+)	10018, 10472, 10673, 11151, 115650, 1435, 146206, 159296, 1777, 2039, 2176, 2207, 2235, 23495, 27040, 29843, 30061, 3059, 3071, 3148, 3398, 3458, 355, 3551, 3559, 3574, 3635, 3717, 3718, 3815, 4067, 4254, 4602, 4891, 50943, 5142, 5316, 5366, 54440, 54536, 54977, 55340, 55553, 56154, 5926, 596, 6597, 6667, 6688, 6776, 836, 8456, 92, 924, 972, 9733, 9770
GO:0006968	cellular defense response	GOBP	44	0.0398589	1.28108	0.000626181	0.00523264	up in HPV(+)	10219, 11126, 1234, 1235, 135, 1524, 2185, 3579, 3702, 3822, 3823, 4046, 4068, 4332, 50852, 5551, 653361, 6693, 729230, 7293, 7305, 7716, 9214, 930
GO:0003333	amino acid transmembrane transport	GOBP	38	-0.0562818	0.704851	0.000634963	0.00529729	up in HPV(-)	124935, 1374, 23428, 23657, 54407, 54716, 55089, 55117, 55238, 5565, 6509, 6541, 8140, 9057, 92745
GO:0002076	osteoblast development	GOBP	17	-0.073186	0.634561	0.000639307	0.00532475	up in HPV(-)	2736, 4488, 5744, 5745, 860
GO:0010562	positive regulation of phosphorus metabolic process	GOBP	732	-0.0161679	0.904406	0.000643542	0.00533786	up in HPV(-)	1000, 10130, 10188, 10395, 10411, 10487, 10525, 107, 10897, 10900, 10920, 10954, 11009, 11015, 11183, 112464, 113, 133, 133396, 136, 1398, 1437, 1453, 1460, 1464, 1490, 152, 1639, 1649, 183, 19, 1906, 1909, 1942, 1946, 1950, 1965, 201163, 203447, 2043, 2069, 207, 2137, 2149, 2150, 2181, 2258, 23286, 23529, 23568, 238, 242, 2535, 255324, 26012, 2621, 2673, 27230, 2778, 28996, 29108, 2914, 2977, 29…
GO:0045937	positive regulation of phosphate metabolic process	GOBP	732	-0.0161679	0.904406	0.000643542	0.00533786	up in HPV(-)	1000, 10130, 10188, 10395, 10411, 10487, 10525, 107, 10897, 10900, 10920, 10954, 11009, 11015, 11183, 112464, 113, 133, 133396, 136, 1398, 1437, 1453, 1460, 1464, 1490, 152, 1639, 1649, 183, 19, 1906, 1909, 1942, 1946, 1950, 1965, 201163, 203447, 2043, 2069, 207, 2137, 2149, 2150, 2181, 2258, 23286, 23529, 23568, 238, 242, 2535, 255324, 26012, 2621, 2673, 27230, 2778, 28996, 29108, 2914, 2977, 29…
GO:0050707	regulation of cytokine secretion	GOBP	88	0.032843	1.22643	0.000644043	0.00533786	up in HPV(+)	10333, 10385, 10859, 1236, 1436, 146206, 192683, 2219, 2268, 22900, 260434, 26253, 283420, 2867, 29126, 3123, 3127, 3357, 3454, 3458, 4067, 50943, 51311, 54106, 5552, 5734, 6348, 6363, 6850, 7096, 7100, 7124, 727, 7292, 7293, 81793, 8764, 914, 9966
GO:0007062	sister chromatid cohesion	GOBP	34	0.0423863	1.30137	0.000659656	0.00543082	up in HPV(+)	114799, 151246, 23047, 23126, 23137, 23244, 23383, 27127, 5889, 8243, 83903, 9126, 9700, 9985
GO:0016458	gene silencing	GOBP	89	0.0326971	1.22532	0.000656831	0.00543082	up in HPV(+)	1017, 11022, 113802, 122402, 143689, 1786, 1788, 192670, 23133, 23409, 23411, 246175, 25904, 26523, 3070, 3784, 4087, 4343, 54487, 5460, 55124, 55553, 57379, 57472, 57690, 57708, 6597, 6839, 8468, 8994, 90459, 9337, 9757
GO:0023051	regulation of signaling	GOBP	2295	-0.00980425	0.940889	0.000660328	0.00543082	up in HPV(-)	100, 1000, 1001, 10016, 10045, 10059, 10105, 1012, 10133, 10134, 10197, 10211, 10252, 10272, 10342, 10344, 10345, 10395, 10411, 10413, 10435, 10458, 10468, 10555, 10617, 10625, 10631, 10681, 10725, 1075, 10758, 10769, 10783, 10809, 10913, 10920, 10962, 10971, 11009, 11033, 11069, 11072, 11171, 11183, 112464, 1131, 11331, 115265, 115557, 116988, 121512, 123920, 125058, 1258, 1277, 1280, 1281, 133,…
GO:0043462	regulation of ATPase activity	GOBP	36	-0.0572161	0.70077	0.000661694	0.00543082	up in HPV(-)	10049, 10105, 10598, 169200, 4624, 4634, 4635, 483, 5216, 5217, 5350, 6588, 7134, 7137, 7139, 7140, 7168, 7169
GO:0070098	chemokine-mediated signaling pathway	GOBP	36	0.0418031	1.29666	0.000660046	0.00543082	up in HPV(+)	10663, 11240, 1230, 1233, 1234, 1235, 1236, 1237, 1240, 1524, 2185, 2826, 2833, 3579, 3627, 6091, 6352, 643, 729230, 7852, 9034
GO:1903289	regulation of ATP catabolic process	GOBP	36	-0.0572161	0.70077	0.000661694	0.00543082	up in HPV(-)	10049, 10105, 10598, 169200, 4624, 4634, 4635, 483, 5216, 5217, 5350, 6588, 7134, 7137, 7139, 7140, 7168, 7169
GO:0006612	protein targeting to membrane	GOBP	168	-0.0312989	0.823238	0.000671548	0.00550278	up in HPV(-)	10627, 10952, 10959, 11224, 2197, 23241, 23478, 23480, 2621, 2664, 286, 29082, 302, 4641, 5064, 51024, 5174, 55690, 5830, 6123, 6132, 6134, 6136, 6137, 6143, 6155, 6167, 6169, 6170, 6173, 6181, 6185, 6187, 6204, 6217, 6227, 6230, 6231, 6386, 6729, 6730, 6734, 6747, 7095, 85377, 8851, 91663, 9270, 9409
GO:0086002	cardiac muscle cell action potential involved in contraction	GOBP	26	-0.0637777	0.672769	0.00067649	0.00553432	up in HPV(-)	10052, 23630, 2697, 3728, 3753, 55800, 6324, 6327, 6330, 6331, 6640, 859
GO:0051084	'de novo' posttranslational protein folding	GOBP	45	-0.0526801	0.720805	0.000705101	0.00575909	up in HPV(-)	10381, 10471, 10574, 10575, 10576, 10808, 1861, 22948, 3312, 5202, 5203, 60, 6950, 7203, 7277, 7280, 7846, 84617, 84790, 8877, 908
GO:0002287	alpha-beta T cell activation involved in immune response	GOBP	35	0.0419381	1.29775	0.000716965	0.00583242	up in HPV(+)	10538, 3458, 3593, 3594, 3662, 3718, 4602, 51561, 5734, 5971, 602, 6097, 6363, 64218, 7292, 8320, 942
GO:0002293	alpha-beta T cell differentiation involved in immune response	GOBP	35	0.0419381	1.29775	0.000716965	0.00583242	up in HPV(+)	10538, 3458, 3593, 3594, 3662, 3718, 4602, 51561, 5734, 5971, 602, 6097, 6363, 64218, 7292, 8320, 942
GO:0031397	negative regulation of protein ubiquitination	GOBP	109	-0.0373861	0.792677	0.000717535	0.00583242	up in HPV(-)	10196, 10197, 10213, 23551, 23560, 246184, 2729, 3984, 51529, 55611, 5682, 5684, 5687, 5688, 5689, 5691, 5693, 5695, 5700, 5701, 5702, 5705, 5706, 5707, 5708, 5709, 5713, 5715, 5717, 5718, 5719, 64359, 7316, 857, 9491, 9529, 9636, 9683, 996
GO:0042981	regulation of apoptotic process	GOBP	1145	-0.013076	0.921952	0.000724939	0.00588316	up in HPV(-)	100, 10016, 10049, 10059, 10105, 10134, 10197, 10202, 10213, 10395, 10413, 1051, 10553, 10617, 10625, 1072, 1075, 10769, 10962, 10971, 11009, 121512, 1280, 1311, 133, 133396, 1410, 1437, 1482, 1490, 16, 1611, 1613, 1649, 1687, 1723, 1728, 1745, 183, 1848, 1906, 1909, 1917, 1961, 196527, 201163, 2017, 207, 2149, 2152, 2191, 2274, 22822, 2303, 2308, 23365, 23529, 23532, 23786, 238, 2537, 2539, 2550…
GO:0071310	cellular response to organic substance	GOBP	1548	-0.0114428	0.931357	0.000733205	0.00594072	up in HPV(-)	10016, 1012, 10130, 10410, 10411, 10458, 1051, 10525, 1053, 10555, 10634, 107, 10897, 10938, 10954, 10979, 11009, 11015, 11031, 11075, 11171, 11173, 113, 121512, 1277, 1278, 1280, 1281, 1282, 1284, 1288, 1290, 1291, 132864, 133396, 135228, 1374, 1398, 1437, 1460, 147372, 1490, 1514, 1594, 16, 1604, 1613, 1639, 1645, 1646, 1649, 1749, 1789, 1809, 183, 1839, 1845, 1848, 1861, 1874, 19, 1906, 1946, …
GO:0030168	platelet activation	GOBP	214	-0.0279728	0.840431	0.000736346	0.00595664	up in HPV(-)	10398, 10411, 10487, 10627, 10630, 1072, 11069, 1192, 1277, 1278, 1281, 1398, 152, 1608, 160851, 1950, 207, 2149, 2151, 22927, 2316, 2335, 23657, 2621, 2768, 2770, 2778, 3309, 3481, 351, 3569, 3690, 388, 388552, 3920, 4627, 5054, 5154, 5155, 5216, 5270, 5578, 5592, 5908, 60, 6464, 6678, 6722, 6915, 7040, 7057, 7076, 71, 710, 7225, 7273, 7277, 7414, 7424, 7534, 813, 84959, 87, 88, 9002, 9158, 9162…
GO:0030889	negative regulation of B cell proliferation	GOBP	15	0.050548	1.36908	0.000740132	0.00596751	up in HPV(+)	1029, 11314, 1493, 151888, 23495, 3635, 4067, 4332, 836
GO:0051017	actin filament bundle assembly	GOBP	92	-0.0399689	0.780055	0.000741225	0.00596751	up in HPV(-)	10395, 10411, 10458, 119, 1490, 1809, 27, 29109, 29984, 3693, 3984, 4430, 4771, 50507, 5058, 50944, 51474, 5216, 5217, 6281, 6422, 6624, 6722, 7168, 7430, 7481, 7791, 8500, 8522, 87, 9270, 9639
GO:0061572	actin filament bundle organization	GOBP	92	-0.0399689	0.780055	0.000741225	0.00596751	up in HPV(-)	10395, 10411, 10458, 119, 1490, 1809, 27, 29109, 29984, 3693, 3984, 4430, 4771, 50507, 5058, 50944, 51474, 5216, 5217, 6281, 6422, 6624, 6722, 7168, 7430, 7481, 7791, 8500, 8522, 87, 9270, 9639
GO:0051437	positive regulation of ubiquitin-protein ligase activity involved in mitotic cell cycle	GOBP	70	-0.0445065	0.758365	0.000745419	0.00598985	up in HPV(-)	10197, 10213, 246184, 51529, 5682, 5684, 5687, 5688, 5689, 5691, 5693, 5695, 5700, 5701, 5702, 5705, 5706, 5707, 5708, 5709, 5713, 5715, 5717, 5718, 5719, 7316, 8454, 9491, 996
GO:0061337	cardiac conduction	GOBP	44	-0.0529221	0.719722	0.000747548	0.00598985	up in HPV(-)	10052, 10345, 23630, 2697, 3270, 3728, 3753, 4205, 477, 5350, 55800, 6324, 6327, 6330, 6331, 6717, 7531, 775, 817, 845
GO:1902107	positive regulation of leukocyte differentiation	GOBP	102	0.0311335	1.21347	0.000746777	0.00598985	up in HPV(+)	101, 1230, 133522, 140685, 1435, 146206, 2323, 3059, 3071, 3108, 3398, 3458, 3559, 3574, 3593, 3594, 3600, 3635, 4179, 4254, 4602, 50943, 51561, 54440, 54997, 55340, 6363, 6776, 6850, 695, 7124, 7292, 7535, 841, 8546, 8737, 8876, 9308, 939, 942, 972
GO:0043067	regulation of programmed cell death	GOBP	1155	-0.0129891	0.92245	0.000750086	0.00600069	up in HPV(-)	100, 10016, 10049, 10059, 10105, 10134, 10197, 10202, 10213, 10395, 10413, 1051, 10553, 10617, 10625, 1072, 1075, 10769, 10962, 10971, 11009, 121512, 1280, 1311, 133, 133396, 1410, 1437, 1471, 1482, 1490, 16, 1611, 1613, 1649, 1687, 1723, 1728, 1745, 183, 1848, 1906, 1909, 1917, 1961, 196527, 201163, 2017, 207, 2149, 2152, 2191, 2274, 22822, 2303, 2308, 23365, 23529, 23532, 23786, 238, 2537, 2539…
GO:0016339	calcium-dependent cell-cell adhesion	GOBP	29	-0.061124	0.683956	0.000757632	0.0060515	up in HPV(-)	1000, 1012, 1014, 1828, 26167, 5098, 53827, 56123, 56125, 56130, 56131, 56133, 57717, 8641
GO:0042310	vasoconstriction	GOBP	55	-0.0486874	0.738915	0.000767883	0.00612372	up in HPV(-)	1131, 133, 152, 183, 185, 1906, 1909, 207, 2149, 2697, 3269, 3352, 3363, 477, 5743, 59, 6640, 6915, 775, 7873, 857
GO:0051351	positive regulation of ligase activity	GOBP	88	-0.0405768	0.777113	0.000772079	0.0061475	up in HPV(-)	10197, 10213, 246184, 51529, 5682, 5684, 5687, 5688, 5689, 5691, 5693, 5695, 5700, 5701, 5702, 5705, 5706, 5707, 5708, 5709, 5713, 5715, 5717, 5718, 5719, 57761, 65018, 7316, 7332, 8312, 8454, 91947, 9491, 996
GO:0060419	heart growth	GOBP	44	-0.0527808	0.720354	0.000781381	0.0062118	up in HPV(-)	1482, 183, 1848, 2303, 2626, 2697, 3084, 4624, 5950, 60485, 6909, 7048, 7472, 859, 9241, 9472
GO:0009966	regulation of signal transduction	GOBP	2074	-0.0100512	0.939447	0.00079835	0.00632683	up in HPV(-)	100, 1000, 1001, 10016, 10045, 10059, 10105, 1012, 10134, 10197, 10211, 10252, 10272, 10342, 10344, 10395, 10411, 10413, 10435, 10468, 10555, 10617, 10625, 10631, 10681, 10725, 1075, 10758, 10769, 10783, 10809, 10913, 10920, 10962, 10971, 11009, 11033, 11069, 11072, 11171, 11183, 112464, 11331, 115265, 115557, 116988, 121512, 123920, 125058, 1258, 1277, 1280, 1281, 133, 133396, 135228, 136, 1398,…
GO:0051436	negative regulation of ubiquitin-protein ligase activity involved in mitotic cell cycle	GOBP	66	-0.0453288	0.754499	0.000797568	0.00632683	up in HPV(-)	10197, 10213, 246184, 51529, 5682, 5684, 5687, 5688, 5689, 5691, 5693, 5695, 5700, 5701, 5702, 5705, 5706, 5707, 5708, 5709, 5713, 5715, 5717, 5718, 5719, 7316, 9491, 996
GO:1901021	positive regulation of calcium ion transmembrane transporter activity	GOBP	18	-0.071026	0.643136	0.000812391	0.00642805	up in HPV(-)	10345, 1482, 57158, 6271, 6786, 84766, 9446, 9472
GO:0002699	positive regulation of immune effector process	GOBP	107	0.0304945	1.20866	0.000824386	0.00651278	up in HPV(+)	10859, 11314, 117157, 2206, 2207, 2208, 2209, 2268, 259197, 2867, 30009, 3109, 3458, 3593, 3594, 3902, 4049, 4067, 4068, 4179, 4602, 4843, 50943, 51561, 54440, 55340, 6363, 6776, 6850, 7124, 718, 7186, 7292, 729230, 8741, 940, 942, 951, 972
GO:0002274	myeloid leukocyte activation	GOBP	122	0.0292091	1.19904	0.000833814	0.0065739	up in HPV(+)	10062, 10077, 10125, 10333, 10537, 10538, 11314, 1191, 1268, 1269, 1435, 1524, 1794, 199, 2206, 2207, 2268, 22904, 27040, 3579, 3662, 3815, 3937, 399, 4067, 4542, 51284, 51311, 5294, 55340, 5581, 57580, 5971, 6348, 6352, 6542, 6688, 6814, 6850, 695, 7096, 7098, 729230, 7305, 7462, 7852, 814, 84106, 914, 942, 951, 962, 972
GO:0050808	synapse organization	GOBP	146	-0.0327232	0.815983	0.00083472	0.0065739	up in HPV(-)	11202, 1282, 1287, 2048, 2049, 2119, 2149, 22941, 23114, 26167, 27286, 3084, 351, 3913, 4734, 4761, 5058, 5064, 50944, 51339, 55906, 56123, 56125, 56130, 56131, 56133, 5649, 57502, 57717, 5789, 64284, 6620, 6622, 6640, 7058, 7474, 7476, 7477, 779, 84189, 92737
GO:0051641	cellular localization	GOBP	2204	-0.00975168	0.941197	0.000855155	0.00672439	up in HPV(-)	1001, 10016, 10043, 10059, 10096, 10105, 1012, 10128, 10133, 10134, 10165, 10204, 10211, 10244, 10345, 10411, 10440, 10452, 10476, 10484, 10487, 10490, 10494, 10514, 10527, 10540, 10553, 10579, 10597, 10627, 10632, 10651, 10652, 1072, 10749, 10758, 10913, 10938, 10945, 10952, 10953, 10956, 10959, 10971, 10972, 10979, 10981, 11014, 11015, 11031, 11037, 11069, 11142, 11187, 11224, 11236, 11267, 112…
GO:0032879	regulation of localization	GOBP	1598	-0.0111326	0.933155	0.000865762	0.00679724	up in HPV(-)	100, 1001, 10016, 10052, 10059, 10089, 10105, 1012, 10188, 1021, 10344, 10345, 10371, 10395, 10411, 10630, 10681, 10699, 10787, 10913, 10938, 10971, 11009, 11037, 11069, 11142, 11171, 11236, 1131, 1192, 1213, 123016, 1277, 1281, 131578, 1318, 136, 1374, 14, 140738, 1410, 144453, 1460, 147372, 147906, 1482, 149111, 152, 1613, 162514, 1649, 1809, 182, 183, 1839, 185, 1861, 1896, 19, 1906, 1909, 194…
GO:0050730	regulation of peptidyl-tyrosine phosphorylation	GOBP	164	-0.0310208	0.824661	0.000875012	0.00685923	up in HPV(-)	10188, 11009, 133396, 1437, 1464, 152, 183, 1942, 1946, 1950, 2069, 23529, 23568, 23624, 255324, 2621, 284114, 3084, 30844, 334, 3481, 351, 3569, 3570, 3589, 3678, 3690, 3976, 4771, 50604, 5154, 5155, 5159, 54209, 5578, 56034, 5649, 58533, 64127, 6422, 6423, 6464, 7039, 7132, 7424, 80725, 84632, 857, 8829, 885, 9244, 948, 960, 975
GO:0031581	hemidesmosome assembly	GOBP	12	-0.0799309	0.608512	0.000880768	0.00689368	up in HPV(-)	1308, 3655, 3861, 3909, 3915, 3918, 5339, 977
GO:0045666	positive regulation of neuron differentiation	GOBP	60	-0.0466266	0.748439	0.000904368	0.00705658	up in HPV(-)	10096, 147040, 1482, 152, 1789, 2119, 26508, 2736, 3170, 3569, 392255, 4674, 4761, 4803, 5914, 6299, 650, 652, 6664, 7050, 7077, 9043, 9628, 9638
GO:0045667	regulation of osteoblast differentiation	GOBP	97	-0.0385933	0.786752	0.000903164	0.00705658	up in HPV(-)	1021, 1051, 117581, 1192, 1749, 182, 2201, 23051, 25819, 2778, 3399, 3488, 3491, 3569, 3570, 374, 4488, 4745, 537, 56975, 64093, 6422, 6423, 650, 652, 658, 6591, 6664, 7291, 7477, 8519, 860, 8646, 90, 9241, 9260
GO:0042590	antigen processing and presentation of exogenous peptide antigen via MHC class I	GOBP	77	-0.0422734	0.768963	0.000923161	0.00719213	up in HPV(-)	10197, 10213, 10952, 23480, 2923, 3107, 3693, 4688, 5682, 5684, 5687, 5688, 5689, 5691, 5693, 5695, 5700, 5701, 5702, 5705, 5706, 5707, 5708, 5709, 5713, 5715, 5717, 5718, 5719, 7316, 948, 9491
GO:0072210	metanephric nephron development	GOBP	34	-0.0572073	0.700808	0.000931136	0.00724313	up in HPV(-)	153572, 2668, 3913, 3976, 5155, 5159, 55083, 6299, 652, 6608, 79192
GO:0032964	collagen biosynthetic process	GOBP	25	-0.0634259	0.674241	0.000942154	0.00731759	up in HPV(-)	1277, 1289, 1490, 2149, 25824, 3569, 3570, 383, 5159, 5467, 652, 7040, 871, 9697
GO:0034968	histone lysine methylation	GOBP	75	0.0336439	1.23255	0.000996953	0.00773135	up in HPV(+)	10919, 1786, 2145, 2146, 22823, 23411, 26147, 29072, 30827, 4602, 5079, 51742, 5252, 54790, 54880, 54904, 55818, 55870, 5926, 6419, 64324, 672, 6839, 7468, 7799, 80335, 83852, 84444, 84787, 9070, 90780, 9757
GO:0045123	cellular extravasation	GOBP	35	0.0412853	1.29249	0.00101386	0.00785043	up in HPV(+)	101, 120425, 3676, 3684, 3695, 50512, 5294, 5734, 6376, 6404, 7124, 729230, 7412
GO:0051482	positive regulation of cytosolic calcium ion concentration involved in phospholipase C-activating G-protein coupled signaling pathway	GOBP	10	-0.0836591	0.594575	0.001017	0.00786276	up in HPV(-)	185, 1906, 1909, 2149, 3358, 7052
GO:0035272	exocrine system development	GOBP	46	-0.0510746	0.728033	0.00102189	0.00788849	up in HPV(-)	10371, 10512, 10913, 1471, 1896, 29842, 3481, 3569, 4233, 5154, 5155, 6591, 6608, 7040, 7052, 8829
GO:0050680	negative regulation of epithelial cell proliferation	GOBP	98	-0.0380684	0.789323	0.00103168	0.00795194	up in HPV(-)	1021, 11171, 11331, 1515, 1948, 2069, 2118, 23213, 2719, 2810, 3987, 4163, 5467, 55679, 5796, 58189, 60485, 6422, 6423, 652, 6591, 6678, 7040, 7046, 7057, 7421, 7474, 7857, 857, 858
GO:0001990	regulation of systemic arterial blood pressure by hormone	GOBP	26	-0.0622501	0.679186	0.00104047	0.00800753	up in HPV(-)	10699, 183, 185, 1906, 2028, 2149, 2150, 290, 3291, 5125, 91608
GO:0045773	positive regulation of axon extension	GOBP	26	-0.0622099	0.679356	0.00105199	0.00807163	up in HPV(-)	2335, 3984, 4131, 4137, 4803, 5048, 51330, 57611, 81565, 8829
GO:0050869	negative regulation of B cell activation	GOBP	29	0.0431282	1.30738	0.00105077	0.00807163	up in HPV(+)	1029, 11314, 1493, 151888, 2302, 23495, 3398, 355, 3635, 4067, 4332, 50943, 64092, 836, 84174
GO:0003158	endothelium development	GOBP	79	-0.0414399	0.772956	0.00106277	0.00812969	up in HPV(-)	10411, 1460, 182, 183, 2150, 2303, 23135, 2697, 2947, 3084, 3209, 3215, 4233, 4478, 5138, 5155, 55273, 57493, 5908, 652, 7430, 7476, 7477, 80781, 81792, 8829, 8985, 90, 91663
GO:0043044	ATP-dependent chromatin remodeling	GOBP	46	0.0384283	1.26975	0.0010615	0.00812969	up in HPV(+)	23421, 387103, 4678, 50511, 57082, 5928, 5931, 64105, 64946, 6597, 6599, 6601, 79172, 79682, 81611, 8289
GO:0050663	cytokine secretion	GOBP	106	0.0301002	1.2057	0.0010817	0.00826204	up in HPV(+)	10333, 10385, 10859, 1236, 127544, 1436, 146206, 192683, 2206, 2219, 2268, 22900, 260434, 26253, 283420, 2867, 29126, 3123, 3127, 3357, 3454, 3458, 3937, 4067, 4853, 50943, 51311, 54106, 5552, 5734, 58484, 6348, 6363, 6850, 7096, 7100, 7124, 727, 7292, 7293, 81793, 8764, 914, 9966
GO:0003073	regulation of systemic arterial blood pressure	GOBP	60	-0.0460381	0.751181	0.00109435	0.00834605	up in HPV(-)	10699, 183, 185, 1906, 2028, 2149, 2150, 2621, 2697, 290, 3291, 5125, 5155, 5331, 65125, 7137, 7168, 7873, 8870, 91608
GO:2000106	regulation of leukocyte apoptotic process	GOBP	62	0.0353605	1.24577	0.00109809	0.00836196	up in HPV(+)	101, 1029, 10859, 1236, 2207, 23411, 27113, 3059, 3620, 3718, 4067, 4254, 6097, 6352, 6363, 6776, 695, 7157, 81704, 841, 84807, 84941, 939, 972
GO:0030968	endoplasmic reticulum unfolded protein response	GOBP	82	-0.0406597	0.776713	0.00112668	0.00856685	up in HPV(-)	10130, 10525, 10897, 10954, 11015, 16, 1639, 1649, 1965, 2137, 267, 2673, 27230, 3309, 3576, 4000, 440275, 468, 51009, 51726, 55033, 55062, 5526, 55738, 55829, 5610, 578, 595, 6464, 6734, 7184, 8614, 9114
GO:0002474	antigen processing and presentation of peptide antigen via MHC class I	GOBP	98	-0.0378151	0.790566	0.00113094	0.00858631	up in HPV(-)	10134, 10197, 10213, 10484, 10952, 23480, 2923, 3107, 3693, 4688, 5682, 5684, 5687, 5688, 5689, 5691, 5693, 5695, 5700, 5701, 5702, 5705, 5706, 5707, 5708, 5709, 5713, 5715, 5717, 5718, 5719, 7316, 948, 9491
GO:0021670	lateral ventricle development	GOBP	11	-0.0809227	0.604773	0.00113611	0.00861265	up in HPV(-)	1021, 25987, 4628, 9253
GO:0034620	cellular response to unfolded protein	GOBP	83	-0.0404053	0.777942	0.00114924	0.00869216	up in HPV(-)	10130, 10525, 10897, 10954, 11015, 16, 1639, 1649, 1965, 2137, 267, 2673, 27230, 3309, 3576, 4000, 440275, 468, 51009, 51726, 55033, 55062, 5526, 55738, 55829, 5610, 578, 595, 6464, 6734, 7184, 8614, 9114
GO:0045595	regulation of cell differentiation	GOBP	1087	-0.0128722	0.92312	0.00115003	0.00869216	up in HPV(-)	100, 1000, 10096, 10109, 1013, 1021, 10234, 10272, 10324, 10371, 10413, 10468, 10494, 10505, 1051, 10634, 1073, 10938, 11007, 11023, 11075, 11171, 11173, 11197, 11202, 117581, 1192, 122953, 1277, 1281, 1289, 1290, 133, 1437, 144165, 147040, 147906, 1482, 1490, 150465, 150572, 152, 1523, 1594, 161882, 1627, 1649, 169200, 1716, 1745, 1746, 1749, 1789, 1809, 182, 1827, 183, 1848, 185, 19, 1906, 1942…
GO:0060541	respiratory system development	GOBP	185	-0.0287849	0.836201	0.00116862	0.0088195	up in HPV(-)	100, 10272, 10290, 10630, 1490, 1523, 1717, 1749, 1896, 1981, 26154, 2626, 2719, 2735, 2736, 3110, 3170, 3265, 383, 3845, 3976, 4323, 5154, 5499, 55036, 55107, 55636, 5744, 57493, 5754, 57616, 5914, 5950, 60485, 64399, 6441, 652, 6664, 6678, 7048, 7067, 7080, 7472, 7474, 7477, 7481, 7965, 8022, 8312, 8985, 9241, 9242, 9509
GO:0010830	regulation of myotube differentiation	GOBP	52	-0.0483732	0.740359	0.00117209	0.0088325	up in HPV(-)	10324, 10938, 144165, 1482, 150572, 1649, 221662, 26287, 27231, 30846, 3399, 3486, 463, 4656, 56603, 652, 6899, 6926, 7040, 7067, 84814, 859, 91653
GO:0030323	respiratory tube development	GOBP	164	-0.0303056	0.828335	0.00118642	0.00892725	up in HPV(-)	100, 10272, 10630, 1490, 1523, 1717, 1981, 26154, 2626, 2719, 2735, 2736, 3170, 3265, 383, 3845, 3976, 4323, 5125, 5154, 5499, 55036, 5744, 57493, 5754, 57616, 5950, 60485, 64399, 6441, 652, 6664, 6678, 7048, 7067, 7080, 7472, 7474, 7477, 7481, 7965, 8022, 8985, 9241, 9509
GO:0001655	urogenital system development	GOBP	273	-0.0241588	0.860589	0.00119108	0.00894888	up in HPV(-)	10272, 10413, 10972, 116039, 123016, 1282, 1523, 153572, 170690, 182, 183, 185, 1909, 196, 201163, 2018, 2028, 2048, 2049, 2200, 2288, 2303, 23213, 25937, 2624, 2650, 26508, 2668, 27130, 2719, 2736, 282679, 28514, 3207, 3209, 3217, 3227, 3237, 3399, 3655, 38, 3913, 3976, 4358, 4609, 4811, 4953, 5125, 5154, 5155, 5159, 5268, 5314, 55083, 55959, 57616, 59, 5914, 5950, 6299, 6422, 650, 652, 6608, 66…
GO:0035967	cellular response to topologically incorrect protein	GOBP	88	-0.0393579	0.783023	0.00119283	0.00894888	up in HPV(-)	10130, 10525, 10897, 10954, 11015, 16, 1639, 1649, 1861, 1965, 2137, 267, 2673, 27230, 3309, 3576, 4000, 440275, 468, 51009, 51726, 55033, 55062, 5526, 55738, 55829, 5610, 578, 595, 6464, 6734, 7184, 8614, 9114
GO:0023052	signaling	GOBP	4427	-0.00748274	0.954562	0.00119737	0.00895639	up in HPV(-)	100, 1000, 1001, 10016, 10045, 100506013, 10052, 10059, 1006, 10060, 10082, 10089, 10096, 10100, 10105, 10109, 1012, 10130, 10133, 10134, 10135, 10175, 10188, 10197, 1021, 10211, 10213, 1022, 10252, 10272, 10342, 10344, 10345, 10371, 10395, 10410, 10411, 10413, 10458, 10468, 10487, 10494, 10505, 10514, 10525, 10527, 10555, 10602, 10617, 10625, 10630, 10631, 10681, 107, 1072, 10725, 1075, 10758, 1…
GO:0044700	single organism signaling	GOBP	4427	-0.00748274	0.954562	0.00119737	0.00895639	up in HPV(-)	100, 1000, 1001, 10016, 10045, 100506013, 10052, 10059, 1006, 10060, 10082, 10089, 10096, 10100, 10105, 10109, 1012, 10130, 10133, 10134, 10135, 10175, 10188, 10197, 1021, 10211, 10213, 1022, 10252, 10272, 10342, 10344, 10345, 10371, 10395, 10410, 10411, 10413, 10458, 10468, 10487, 10494, 10505, 10514, 10525, 10527, 10555, 10602, 10617, 10625, 10630, 10631, 10681, 107, 1072, 10725, 1075, 10758, 1…
GO:0002260	lymphocyte homeostasis	GOBP	53	0.0367306	1.25642	0.00122059	0.00911663	up in HPV(+)	10018, 10673, 11151, 115650, 23495, 27040, 30061, 3071, 355, 3551, 3559, 3718, 4067, 50943, 5366, 55340, 596, 6776, 836, 8456, 972
GO:0006878	cellular copper ion homeostasis	GOBP	12	-0.078542	0.613787	0.00123315	0.0091969	up in HPV(-)	1318, 334, 351, 375, 4502, 540, 5621, 6341
GO:0010466	negative regulation of peptidase activity	GOBP	167	-0.0299646	0.830093	0.00123894	0.00922647	up in HPV(-)	10049, 11009, 12, 128488, 135228, 1410, 1471, 1474, 183, 207, 2537, 25824, 2621, 2719, 27344, 2810, 3164, 334, 340267, 351, 3569, 4018, 404203, 5045, 5054, 50859, 51050, 51232, 5266, 5268, 5270, 5447, 54475, 55031, 55795, 57630, 58189, 5896, 59082, 6423, 6622, 6653, 6695, 7057, 7076, 7077, 7078, 710, 8301, 8434, 871, 9491, 960
GO:0009612	response to mechanical stimulus	GOBP	151	-0.0312679	0.823396	0.00125671	0.00934504	up in HPV(-)	1277, 1281, 1301, 1827, 183, 1909, 207, 22927, 2626, 2697, 27063, 2736, 3481, 3485, 3569, 3625, 3728, 4055, 4323, 477, 4803, 50964, 5138, 5270, 55584, 5743, 578, 58, 5970, 6416, 664, 7048, 7057, 7132, 7273, 8048, 8061, 84189, 8557, 8772
GO:0006605	protein targeting	GOBP	489	-0.018397	0.891963	0.00127292	0.00944037	up in HPV(-)	10133, 10440, 10452, 10527, 10627, 10651, 1072, 10913, 10952, 10953, 10956, 10959, 10971, 11142, 11224, 116988, 144165, 147906, 1678, 183, 1896, 1950, 2010, 207, 2149, 2197, 2316, 23189, 23203, 23241, 23478, 23480, 23625, 25793, 25805, 25937, 2621, 26519, 26520, 26521, 2664, 286, 29082, 2923, 29928, 302, 3320, 3326, 347, 3569, 3606, 3728, 3839, 3843, 4000, 402569, 4188, 4641, 4734, 5064, 51024, 5…
GO:0030204	chondroitin sulfate metabolic process	GOBP	52	-0.048103	0.741603	0.00127326	0.00944037	up in HPV(-)	10082, 10090, 1462, 1464, 22856, 256691, 2719, 2817, 3073, 3423, 50515, 50859, 54480, 55454, 56548, 633, 6383, 79586, 92126, 9469
GO:0050927	positive regulation of positive chemotaxis	GOBP	22	-0.0649794	0.667763	0.00127576	0.00944507	up in HPV(-)	1012, 2150, 2152, 3576, 5578, 7424, 7857, 9048
GO:0002440	production of molecular mediator of immune response	GOBP	104	0.0299648	1.20469	0.00128678	0.00951281	up in HPV(+)	10538, 10673, 10859, 2207, 2867, 2956, 30009, 3119, 3120, 3123, 3127, 3458, 355, 3718, 3815, 4292, 4436, 4437, 50943, 51237, 54440, 54900, 55340, 57379, 695, 7124, 7186, 7292, 7293, 7374, 8741, 8764, 9156, 940, 9466, 951, 959, 972, 9865
GO:0071887	leukocyte apoptotic process	GOBP	80	0.0325207	1.22397	0.0012899	0.00952196	up in HPV(+)	10018, 101, 1029, 10859, 1236, 2207, 23411, 27113, 3059, 3458, 355, 3559, 356, 3620, 3718, 4067, 4254, 6097, 6352, 6363, 6776, 695, 7157, 81704, 841, 84807, 84941, 8737, 939, 972
GO:0007160	cell-matrix adhesion	GOBP	164	-0.0300721	0.829538	0.00130783	0.00964027	up in HPV(-)	1012, 1021, 10395, 10894, 10979, 1281, 1305, 1308, 1490, 1613, 183, 1896, 1946, 22795, 22801, 2335, 23499, 29984, 347, 3655, 3690, 3693, 3987, 4059, 4323, 4771, 4811, 50509, 5054, 5328, 54749, 5796, 5829, 6281, 63923, 6422, 6722, 7057, 7070, 7205, 7414, 7424, 7791, 81792, 83700, 8496, 8499, 8500, 87, 88, 8910, 9270, 948, 960
GO:0033124	regulation of GTP catabolic process	GOBP	466	0.0171552	1.1125	0.00131159	0.009642	up in HPV(+)	100271715, 10044, 10125, 10235, 10564, 10636, 10641, 1102, 11138, 11153, 115703, 116, 116986, 117289, 120892, 1236, 126006, 126432, 128239, 128272, 153020, 1794, 201627, 2146, 2185, 221178, 22898, 2302, 23041, 23092, 23179, 23263, 23362, 23526, 23527, 2475, 255520, 257106, 25780, 25894, 26034, 26084, 266747, 27128, 27237, 2776, 29127, 3071, 3268, 3357, 343578, 374403, 393, 397, 408, 409, 440107, …
GO:0045076	regulation of interleukin-2 biosynthetic process	GOBP	18	0.0475483	1.34379	0.00131378	0.009642	up in HPV(+)	3662, 3902, 50943, 64170, 6776, 84433, 916, 920, 940, 942
GO:2000725	regulation of cardiac muscle cell differentiation	GOBP	15	-0.0731959	0.634522	0.00131255	0.009642	up in HPV(-)	144165, 1948, 22943, 650, 652, 859, 9472
GO:0030017	sarcomere	GOCC	153	-0.0868845	0.582775	3.22317e-32	2.02738e-29	up in HPV(-)	10049, 10060, 10324, 103910, 10398, 10539, 10627, 1073, 10979, 11155, 113146, 115557, 127294, 129446, 131377, 1410, 1674, 2274, 2275, 2280, 22927, 2318, 23363, 23676, 26287, 26548, 27063, 274, 286, 29765, 29780, 3270, 347273, 3728, 375, 3753, 4313, 4619, 4620, 4621, 4624, 4625, 4626, 4632, 4633, 4634, 4635, 4703, 5058, 55742, 55800, 5687, 57158, 57159, 58, 6271, 6334, 6717, 70, 7134, 7135, 7136, …
GO:0031012	extracellular matrix	GOCC	345	-0.0669521	0.659627	8.01318e-32	2.52014e-29	up in HPV(-)	1006, 10082, 10319, 10417, 10418, 10631, 11096, 11117, 11173, 11174, 126638, 1278, 1280, 1281, 1282, 1284, 1287, 1288, 1290, 1291, 1292, 1293, 1295, 1300, 1301, 1303, 1306, 1308, 136227, 1397, 140766, 1462, 147372, 1490, 165, 170689, 170690, 176, 2152, 2200, 2201, 2202, 2239, 22795, 22798, 2335, 23767, 23768, 24144, 249, 255631, 256691, 2719, 2734, 2817, 284217, 284297, 30008, 302, 304, 3371, 340…
GO:0043292	contractile fiber	GOCC	187	-0.0808238	0.605144	2.28853e-31	4.79829e-29	up in HPV(-)	10049, 10060, 10324, 103910, 10398, 10539, 10627, 1073, 10979, 11155, 113146, 115557, 127294, 129446, 131377, 1410, 1674, 2274, 2275, 2280, 22927, 2318, 23363, 23676, 26287, 26548, 2697, 27063, 274, 286, 29765, 29780, 29895, 3270, 347273, 3728, 375, 3753, 4313, 4604, 4619, 4620, 4621, 4624, 4625, 4626, 4632, 4633, 4634, 4635, 4703, 4892, 5058, 5339, 55742, 55800, 5687, 57158, 57159, 58, 59, 6271,…
GO:0030016	myofibril	GOCC	176	-0.0818858	0.601164	6.15062e-31	9.08682e-29	up in HPV(-)	10049, 10060, 10324, 103910, 10398, 10539, 10627, 1073, 10979, 11155, 113146, 115557, 127294, 129446, 131377, 1410, 1674, 2274, 2275, 2280, 22927, 2318, 23363, 23676, 26287, 26548, 27063, 274, 286, 29765, 29780, 3270, 347273, 3728, 375, 3753, 4313, 4604, 4619, 4620, 4621, 4624, 4625, 4626, 4632, 4633, 4634, 4635, 4703, 4892, 5058, 5339, 55742, 55800, 5687, 57158, 57159, 58, 6271, 6334, 6341, 6717…
GO:0044449	contractile fiber part	GOCC	169	-0.0828367	0.597622	7.22323e-31	9.08682e-29	up in HPV(-)	10049, 10060, 10324, 103910, 10398, 10539, 10627, 1073, 10979, 11155, 113146, 115557, 127294, 129446, 131377, 1410, 1674, 2274, 2275, 2280, 22927, 2318, 23363, 23676, 26287, 26548, 27063, 274, 286, 29765, 29780, 29895, 3270, 347273, 3728, 375, 3753, 4313, 4619, 4620, 4621, 4624, 4625, 4626, 4632, 4633, 4634, 4635, 4703, 5058, 5339, 55742, 55800, 5687, 57158, 57159, 58, 59, 6271, 6334, 6717, 70, 7…
GO:0005578	proteinaceous extracellular matrix	GOCC	285	-0.0664861	0.66154	4.57591e-27	4.79708e-25	up in HPV(-)	10082, 10319, 10417, 10418, 10631, 11096, 11117, 11173, 11174, 126638, 1278, 1280, 1281, 1282, 1284, 1287, 1288, 1290, 1291, 1292, 1293, 1295, 1300, 1301, 1303, 1306, 1308, 136227, 140766, 1462, 1490, 170689, 170690, 176, 2200, 2201, 2202, 2239, 22795, 22798, 2335, 23767, 23768, 24144, 255631, 256691, 2719, 2817, 284217, 30008, 302, 304, 3371, 340267, 341640, 3655, 3688, 3908, 3909, 3910, 3912, 3…
GO:0005576	extracellular region	GOCC	3333	-0.0258843	0.851411	1.0401e-23	9.34606e-22	up in HPV(-)	100, 1000, 10016, 100506013, 10058, 10072, 10082, 10085, 1009, 10095, 10096, 10109, 1012, 10121, 1013, 10130, 10135, 1014, 10202, 10204, 10211, 10213, 10234, 10272, 10294, 10319, 10342, 10344, 10371, 103910, 10409, 1041, 10410, 10411, 10417, 10418, 10447, 10458, 10468, 10476, 10487, 10493, 10494, 10512, 10518, 10525, 10539, 10540, 10544, 10552, 10574, 10575, 10576, 10598, 10606, 10617, 10627, 106…
GO:0044421	extracellular region part	GOCC	2939	-0.025715	0.852307	8.28081e-22	6.51079e-20	up in HPV(-)	100, 1000, 10016, 100506013, 10058, 10072, 10082, 10085, 1009, 10095, 10096, 10109, 1012, 10121, 1013, 10130, 10135, 1014, 10202, 10204, 10211, 10213, 10234, 10272, 10294, 10319, 10342, 10344, 103910, 10409, 1041, 10410, 10411, 10417, 10418, 10447, 10458, 10476, 10487, 10493, 10494, 10512, 10518, 10525, 10539, 10540, 10544, 10552, 10574, 10575, 10576, 10598, 10606, 10617, 10627, 10631, 10632, 106…
GO:0031674	I band	GOCC	105	-0.0832559	0.596067	1.14785e-21	8.0222e-20	up in HPV(-)	10049, 103910, 10398, 10539, 10627, 1073, 10979, 11155, 113146, 129446, 1410, 1674, 2274, 2275, 2280, 2318, 23363, 26287, 26548, 27063, 274, 286, 29780, 3270, 347273, 3728, 3753, 4624, 4625, 4634, 4703, 5058, 55742, 55800, 57158, 57159, 6271, 6334, 6717, 70, 775, 779, 79933, 8048, 81493, 845, 84665, 84676, 8557, 859, 88, 91156, 91624, 91977, 9499
GO:0005924	cell-substrate adherens junction	GOCC	369	-0.0534283	0.717462	4.26407e-20	2.6821e-18	up in HPV(-)	1000, 10095, 10096, 10109, 1012, 10211, 10395, 10487, 10518, 10525, 10544, 1072, 10787, 10867, 10971, 10979, 1213, 1264, 1464, 1948, 2017, 2191, 2273, 2274, 2275, 22800, 22801, 23011, 23114, 2314, 2316, 23164, 2318, 23603, 23676, 23768, 2535, 25996, 26136, 26574, 2697, 2768, 2783, 28964, 2923, 2934, 29780, 308, 3309, 3312, 3371, 3482, 3655, 3675, 3678, 3688, 3690, 3693, 3728, 375, 388, 3897, 3984…
GO:0030055	cell-substrate junction	GOCC	372	-0.0529858	0.719437	7.40662e-20	4.23524e-18	up in HPV(-)	1000, 10095, 10096, 10109, 1012, 10211, 10395, 10487, 10518, 10525, 10544, 1072, 10787, 10867, 10971, 10979, 1213, 1264, 1308, 1464, 1948, 2017, 2191, 2273, 2274, 2275, 22800, 22801, 23011, 23114, 2314, 2316, 23164, 2318, 23603, 23676, 23768, 2535, 25996, 26136, 26574, 2697, 2768, 2783, 28964, 2923, 2934, 29780, 308, 3309, 3312, 3371, 3482, 3655, 3675, 3678, 3688, 3690, 3693, 3728, 375, 388, 3897…
GO:0005694	chromosome	GOCC	638	0.0385945	1.27106	2.41161e-19	1.16685e-17	up in HPV(+)	10036, 10051, 10062, 10274, 1029, 10320, 10388, 10403, 10472, 10592, 1060, 1063, 10714, 10734, 10919, 11004, 11073, 11130, 11144, 11168, 11169, 11240, 11339, 114799, 144715, 147841, 147872, 151246, 151648, 157313, 157570, 1677, 1786, 1788, 2099, 2146, 2177, 220134, 22893, 23047, 23076, 23081, 23122, 23126, 23137, 23157, 23244, 23347, 23383, 23411, 23421, 23466, 23468, 23492, 23512, 23514, 23649, …
GO:0005925	focal adhesion	GOCC	364	-0.0527927	0.720301	2.31747e-19	1.16685e-17	up in HPV(-)	1000, 10095, 10096, 10109, 1012, 10211, 10395, 10487, 10525, 10544, 1072, 10787, 10867, 10971, 10979, 1213, 1264, 1464, 1948, 2017, 2191, 2273, 2274, 2275, 22800, 22801, 23011, 23114, 2314, 2316, 23164, 2318, 23603, 23768, 2535, 25996, 26136, 26574, 2697, 2768, 2783, 28964, 2923, 2934, 29780, 308, 3309, 3312, 3371, 3482, 3655, 3675, 3678, 3688, 3690, 3693, 3728, 375, 388, 3897, 3984, 3987, 4082, …
GO:0044444	cytoplasmic part	GOCC	6311	-0.0197711	0.884379	6.22818e-19	2.79823e-17	up in HPV(-)	100, 100128731, 10016, 100272147, 100287932, 10049, 10052, 10056, 10058, 10059, 10060, 10061, 10071, 10082, 10090, 10096, 10102, 10105, 10109, 1012, 10121, 10128, 10130, 10135, 10162, 10165, 10175, 10188, 10196, 10197, 10202, 10204, 1021, 10211, 10213, 1022, 10226, 10237, 10244, 10252, 10272, 10294, 10295, 10299, 10324, 10328, 10330, 10345, 103910, 10395, 10398, 10400, 10410, 10413, 10423, 10430,…
GO:0030018	Z disc	GOCC	91	-0.0819521	0.600916	1.38117e-18	5.79172e-17	up in HPV(-)	10049, 103910, 10398, 10539, 10627, 11155, 113146, 129446, 1410, 1674, 2274, 2275, 2280, 2318, 23363, 26548, 274, 286, 29780, 3270, 347273, 3728, 3753, 4624, 4625, 4703, 5058, 55742, 55800, 57158, 57159, 6271, 6334, 6717, 775, 79933, 8048, 81493, 845, 84665, 84676, 8557, 859, 88, 91156, 91624, 91977, 9499
GO:0070161	anchoring junction	GOCC	443	-0.0478828	0.742619	2.6893e-18	1.05723e-16	up in HPV(-)	1000, 1001, 10095, 10096, 10109, 1012, 10188, 10211, 10395, 1041, 10487, 10518, 10525, 10544, 1072, 10787, 10867, 10971, 10979, 11187, 1213, 1264, 1464, 165904, 1674, 1948, 2017, 2191, 2273, 2274, 2275, 22800, 22801, 23011, 23114, 2314, 2316, 23164, 2318, 23603, 23676, 23768, 2535, 25996, 26136, 26574, 2697, 2768, 2783, 28964, 2923, 2934, 29780, 308, 3309, 3312, 3371, 3482, 3655, 3675, 3678, 3688…
GO:0044427	chromosomal part	GOCC	552	0.0383013	1.26874	2.23111e-17	8.25511e-16	up in HPV(+)	10036, 10051, 10062, 10274, 1029, 10320, 10388, 10403, 10592, 1060, 1063, 10714, 10734, 11004, 11130, 11144, 11168, 11169, 11240, 11339, 114799, 144715, 147841, 147872, 151246, 151648, 157570, 1677, 1786, 1788, 2099, 2146, 220134, 23047, 23076, 23081, 23122, 23126, 23137, 23157, 23244, 23383, 23411, 23421, 23466, 23468, 23492, 23512, 23649, 253714, 2551, 256126, 25777, 26013, 27022, 27085, 27127,…
GO:0005912	adherens junction	GOCC	426	-0.0462841	0.750033	1.67092e-16	5.83895e-15	up in HPV(-)	1000, 1001, 10095, 10096, 10109, 1012, 10188, 10211, 10395, 10487, 10518, 10525, 10544, 1072, 10787, 10867, 10971, 10979, 1213, 1264, 1464, 165904, 1674, 1948, 2017, 2191, 2273, 2274, 2275, 22800, 22801, 23011, 23114, 2314, 2316, 23164, 2318, 23603, 23676, 23768, 2535, 25996, 26136, 26574, 2697, 2768, 2783, 28964, 2923, 2934, 29780, 308, 3309, 3312, 3371, 3482, 3655, 3675, 3678, 3688, 3690, 3693,…
GO:0005737	cytoplasm	GOCC	8396	-0.0177174	0.895739	4.50145e-15	1.49022e-13	up in HPV(-)	100, 1001, 100128731, 10016, 100272147, 100287932, 10049, 10052, 10056, 10058, 10059, 10060, 10061, 10071, 10072, 10082, 1009, 10090, 10095, 10096, 10102, 10105, 10109, 1012, 10121, 10128, 10130, 10135, 10162, 10165, 10175, 10188, 10196, 10197, 10200, 10202, 10204, 10209, 1021, 10211, 10213, 1022, 10226, 10237, 10244, 10248, 10252, 10272, 10294, 10295, 10299, 10324, 10328, 10330, 10342, 10345, 10…
GO:0005634	nucleus	GOCC	5505	0.0172266	1.113	9.46213e-15	2.97584e-13	up in HPV(+)	10000, 10009, 100101467, 100128927, 100129654, 10013, 100131390, 100131827, 100289678, 100316904, 10036, 10042, 10048, 10051, 10062, 10075, 10087, 10181, 10194, 10217, 10224, 10236, 10250, 1027, 10274, 1028, 10283, 1029, 10293, 10309, 1031, 10311, 10318, 1032, 10320, 10336, 10388, 10389, 10403, 10420, 10425, 1047, 10472, 10481, 10499, 105, 10521, 10522, 10535, 10537, 10538, 10569, 10592, 1060, 10…
GO:0000228	nuclear chromosome	GOCC	319	0.041069	1.29076	3.75152e-14	1.12367e-12	up in HPV(+)	10036, 10062, 10388, 10403, 10472, 10592, 1060, 10714, 10734, 11073, 11144, 11168, 144715, 151648, 157570, 1677, 1788, 2146, 23081, 23126, 23347, 23411, 23468, 23492, 23512, 23514, 23649, 253714, 2551, 256126, 25777, 27022, 27033, 27127, 285498, 29128, 2956, 29803, 340533, 3622, 3659, 3662, 4087, 4089, 4171, 4172, 4292, 4436, 4437, 4582, 4678, 4751, 4796, 4998, 5080, 5111, 5422, 5424, 5426, 5427,…
GO:0000795	synaptonemal complex	GOCC	22	0.0751822	1.59557	5.23083e-14	1.49554e-12	up in HPV(+)	10388, 10734, 256126, 27127, 285498, 4292, 8468, 9126, 9985
GO:0043230	extracellular organelle	GOCC	2305	-0.0216209	0.87427	9.02982e-14	2.18452e-12	up in HPV(-)	1000, 10016, 10058, 10072, 10085, 1009, 10095, 10096, 10109, 1012, 10121, 1013, 10130, 10135, 1014, 10202, 10204, 10211, 10213, 10294, 10342, 103910, 10409, 1041, 10410, 10411, 10417, 10447, 10458, 10476, 10487, 10493, 10494, 10512, 10525, 10539, 10540, 10544, 10552, 10574, 10575, 10576, 10598, 10606, 10617, 10627, 10632, 10652, 107, 1072, 1073, 1075, 10787, 10808, 10810, 10878, 10894, 10920, 109…
GO:0044454	nuclear chromosome part	GOCC	286	0.0419138	1.29755	8.46935e-14	2.18452e-12	up in HPV(+)	10036, 10062, 10388, 10403, 1060, 10714, 10734, 11168, 144715, 151648, 157570, 1677, 1788, 2146, 23081, 23126, 23411, 23468, 23492, 23512, 23649, 253714, 2551, 256126, 25777, 27022, 27127, 285498, 29128, 2956, 29803, 340533, 3622, 3659, 3662, 4087, 4089, 4171, 4172, 4292, 4582, 4678, 4796, 4998, 5080, 5111, 5422, 5424, 5426, 5427, 54556, 5457, 54737, 55723, 57658, 57805, 5928, 5991, 6118, 6304, 6…
GO:0065010	extracellular membrane-bounded organelle	GOCC	2305	-0.0216209	0.87427	9.02982e-14	2.18452e-12	up in HPV(-)	1000, 10016, 10058, 10072, 10085, 1009, 10095, 10096, 10109, 1012, 10121, 1013, 10130, 10135, 1014, 10202, 10204, 10211, 10213, 10294, 10342, 103910, 10409, 1041, 10410, 10411, 10417, 10447, 10458, 10476, 10487, 10493, 10494, 10512, 10525, 10539, 10540, 10544, 10552, 10574, 10575, 10576, 10598, 10606, 10617, 10627, 10632, 10652, 107, 1072, 1073, 1075, 10787, 10808, 10810, 10878, 10894, 10920, 109…
GO:0070062	extracellular vesicular exosome	GOCC	2305	-0.0216209	0.87427	9.02982e-14	2.18452e-12	up in HPV(-)	1000, 10016, 10058, 10072, 10085, 1009, 10095, 10096, 10109, 1012, 10121, 1013, 10130, 10135, 1014, 10202, 10204, 10211, 10213, 10294, 10342, 103910, 10409, 1041, 10410, 10411, 10417, 10447, 10458, 10476, 10487, 10493, 10494, 10512, 10525, 10539, 10540, 10544, 10552, 10574, 10575, 10576, 10598, 10606, 10617, 10627, 10632, 10652, 107, 1072, 1073, 1075, 10787, 10808, 10810, 10878, 10894, 10920, 109…
GO:0031982	vesicle	GOCC	2929	-0.0197615	0.884432	1.06666e-13	2.48492e-12	up in HPV(-)	100, 1000, 10016, 10058, 10059, 10072, 10085, 1009, 10095, 10096, 10109, 1012, 10121, 1013, 10130, 10135, 1014, 10188, 10202, 10204, 10211, 10213, 10272, 10294, 10342, 103910, 10409, 1041, 10410, 10411, 10417, 10447, 10458, 10476, 10484, 10487, 10490, 10493, 10494, 10512, 10525, 10539, 10540, 10544, 10548, 10552, 10567, 10574, 10575, 10576, 10598, 10606, 10617, 10627, 10632, 10652, 107, 1072, 107…
GO:0031988	membrane-bounded vesicle	GOCC	2850	-0.0196882	0.884835	2.18344e-13	4.90494e-12	up in HPV(-)	100, 1000, 10016, 10058, 10059, 10072, 10085, 1009, 10095, 10096, 10109, 1012, 10121, 1013, 10130, 10135, 1014, 10188, 10202, 10204, 10211, 10213, 10272, 10294, 10342, 103910, 10409, 1041, 10410, 10411, 10417, 10447, 10458, 10476, 10484, 10487, 10490, 10493, 10494, 10512, 10525, 10539, 10540, 10544, 10552, 10567, 10574, 10575, 10576, 10598, 10606, 10617, 10627, 10632, 10652, 107, 1072, 1073, 1075…
GO:0005615	extracellular space	GOCC	857	-0.0301559	0.829106	3.0458e-12	6.60624e-11	up in HPV(-)	100, 100506013, 10082, 1012, 10135, 10234, 10272, 10344, 10418, 10512, 10518, 1072, 1073, 1075, 10797, 10878, 10940, 11009, 11012, 11167, 11202, 112616, 114904, 1192, 12, 123920, 1278, 1280, 1281, 128240, 1292, 1293, 1303, 1306, 1314, 133, 135228, 137902, 1437, 1462, 146223, 147372, 148738, 1490, 1513, 1514, 1515, 152189, 159686, 165, 1809, 183, 1839, 1906, 1950, 2069, 2152, 218, 2191, 2197, 2200…
GO:0044420	extracellular matrix part	GOCC	115	-0.0643742	0.67028	3.52597e-12	7.39277e-11	up in HPV(-)	1006, 10319, 1278, 1280, 1281, 1282, 1284, 1287, 1288, 1290, 1295, 1301, 1303, 1306, 1308, 2200, 2201, 22795, 22798, 2335, 284217, 30008, 302, 304, 3371, 340267, 341640, 3655, 3688, 3908, 3909, 3910, 3912, 3913, 3915, 3918, 401138, 4017, 4060, 4237, 4811, 50509, 5803, 6622, 6678, 7045, 7058, 7076, 7077, 7078, 79875, 8076, 80781, 9510, 954
GO:0000793	condensed chromosome	GOCC	161	0.0441899	1.31603	8.66331e-11	1.75781e-09	up in HPV(+)	10051, 10388, 10403, 10592, 1060, 1063, 10734, 11004, 11073, 11130, 11144, 144715, 147841, 151246, 151648, 2177, 220134, 23122, 23137, 23157, 23421, 256126, 25777, 26013, 27127, 285498, 3148, 348995, 378708, 387103, 4288, 4292, 4751, 493861, 54821, 55055, 57082, 64105, 64946, 6839, 701, 7153, 79019, 79172, 79677, 79682, 79980, 8243, 8468, 84787, 9126, 9735, 9985
GO:0000794	condensed nuclear chromosome	GOCC	61	0.0554694	1.4116	1.24022e-10	2.43781e-09	up in HPV(+)	10388, 10403, 1060, 10734, 11073, 11144, 144715, 151648, 256126, 25777, 27127, 285498, 4292, 4751, 6839, 701, 8243, 8468, 84787, 9126, 9985
GO:0012505	endomembrane system	GOCC	2853	-0.0171099	0.899127	1.54348e-10	2.94196e-09	up in HPV(-)	100128731, 10016, 10052, 10058, 10059, 10071, 10082, 10090, 10096, 10109, 10128, 10130, 10162, 10175, 10188, 10202, 10204, 10211, 10226, 10237, 10244, 10272, 10299, 10328, 10330, 10345, 10400, 10410, 10411, 10423, 10430, 10447, 10484, 10490, 10494, 10505, 10525, 10527, 10536, 10553, 10555, 10567, 10579, 10597, 10598, 10602, 10617, 10631, 10652, 1066, 10749, 1075, 10897, 10938, 10945, 10952, 10954…
GO:0008278	cohesin complex	GOCC	10	0.0770815	1.61451	5.11539e-10	9.46348e-09	up in HPV(+)	10734, 151246, 151648, 27127, 8243, 9126, 9985
GO:0005788	endoplasmic reticulum lumen	GOCC	161	-0.0523382	0.722338	6.90655e-10	1.24121e-08	up in HPV(-)	10130, 10345, 10525, 10536, 1066, 10954, 10956, 1278, 1280, 1281, 1282, 1284, 1287, 1288, 1290, 1291, 1292, 1293, 1295, 1300, 1301, 1303, 1305, 1306, 1308, 136227, 23071, 23241, 23753, 255631, 25870, 2621, 283208, 2882, 2923, 3270, 3309, 340075, 340267, 415, 4909, 493869, 5034, 50509, 51060, 51148, 5154, 5155, 51661, 51726, 5479, 55033, 56034, 5624, 57333, 590, 60681, 64175, 7184, 7473, 7475, 747…
GO:0015629	actin cytoskeleton	GOCC	359	-0.0376383	0.791435	1.83835e-09	3.21201e-08	up in HPV(-)	10095, 10096, 10109, 10121, 10391, 103910, 10398, 10458, 10487, 10540, 10552, 10602, 10627, 10634, 1072, 1073, 10801, 10979, 11034, 119, 121512, 124590, 134265, 1410, 1627, 1639, 1809, 2274, 2275, 22885, 23002, 23012, 2316, 23164, 23237, 23242, 23433, 23603, 26284, 26512, 27, 27129, 27147, 273, 274, 29109, 2934, 29765, 29895, 359845, 3728, 4082, 4430, 4604, 4606, 4608, 4619, 4620, 4621, 4624, 462…
GO:0005916	fascia adherens	GOCC	12	-0.114797	0.489966	2.07063e-09	3.52007e-08	up in HPV(-)	1000, 165904, 1674, 2697, 3728, 4892, 7414, 83660
GO:0042641	actomyosin	GOCC	60	-0.0714639	0.641388	2.23633e-09	3.70171e-08	up in HPV(-)	103910, 10398, 10627, 10634, 10801, 10979, 1627, 2275, 22885, 23002, 29109, 4624, 4625, 4627, 4628, 4638, 51474, 54751, 55740, 58, 5829, 6624, 6804, 70, 7168, 7170, 7171, 7791, 9260, 9578
GO:0005783	endoplasmic reticulum	GOCC	1233	-0.0217998	0.873299	5.14647e-09	8.24688e-08	up in HPV(-)	100128731, 10016, 10052, 10058, 10130, 10162, 10175, 10237, 10299, 10328, 10330, 10345, 10400, 10423, 10430, 10484, 10505, 10525, 10536, 10555, 10597, 10598, 10652, 1066, 10749, 1075, 10897, 10945, 10952, 10954, 10956, 10959, 10970, 10972, 10999, 11009, 11014, 11015, 11145, 11236, 11328, 11343, 114879, 125704, 126410, 1278, 1280, 1281, 1282, 1284, 1287, 1288, 1290, 1291, 1292, 1293, 1295, 129642,…
GO:0030054	cell junction	GOCC	936	-0.0245026	0.858753	5.24444e-09	8.24688e-08	up in HPV(-)	100, 1000, 1001, 10052, 10059, 10095, 10096, 10109, 1012, 10188, 10211, 10395, 10409, 1041, 10487, 10518, 10525, 10544, 10567, 1072, 10787, 10804, 10809, 10867, 10971, 10979, 11171, 11187, 1131, 1134, 114088, 1144, 1146, 1213, 122786, 1244, 1264, 129446, 1305, 1308, 134265, 1464, 1627, 165904, 1674, 1837, 1948, 201163, 2017, 2043, 2191, 2258, 2273, 2274, 2275, 22800, 22801, 22941, 23011, 23034, 2…
GO:0005657	replication fork	GOCC	53	0.0532425	1.39219	9.97693e-09	1.53061e-07	up in HPV(+)	10714, 1786, 23649, 253714, 29128, 340533, 4172, 4796, 5111, 5422, 5424, 5426, 5427, 5889, 5981, 5983, 5984, 6118, 7157, 7516, 83637
GO:0005604	basement membrane	GOCC	85	-0.0616069	0.681907	1.27926e-08	1.91584e-07	up in HPV(-)	10319, 1280, 1282, 1284, 1287, 1288, 1295, 1306, 1308, 2200, 22795, 22798, 2335, 284217, 30008, 302, 304, 3371, 340267, 341640, 3655, 3688, 3908, 3909, 3910, 3912, 3913, 3915, 3918, 401138, 4017, 4811, 6678, 7045, 7058, 7076, 7077, 7078, 80781, 9510, 954
GO:0043005	neuron projection	GOCC	622	-0.0278673	0.840982	2.67475e-08	3.9126e-07	up in HPV(-)	100, 1006, 10109, 1012, 10188, 10272, 10371, 10409, 10458, 10540, 10642, 10769, 11075, 1131, 11332, 114088, 1258, 1400, 147700, 1515, 152, 1627, 1809, 1826, 1837, 1855, 2017, 2043, 2048, 2049, 2258, 2288, 22941, 23034, 23108, 23109, 23114, 23154, 2316, 23237, 23242, 23413, 23710, 2535, 2550, 25791, 25814, 25828, 2596, 26012, 26232, 2664, 267, 274, 2778, 282679, 286, 2898, 2914, 29966, 3084, 323, …
GO:0014704	intercalated disc	GOCC	43	-0.0747113	0.628574	4.49211e-08	6.39863e-07	up in HPV(-)	1000, 10052, 165904, 1674, 2258, 23363, 2697, 3688, 3728, 4619, 4892, 5058, 6324, 6330, 6331, 7414, 7533, 817, 83660
GO:0042101	T cell receptor complex	GOCC	14	0.0673724	1.51997	4.57772e-08	6.39863e-07	up in HPV(+)	50852, 5777, 6850, 7535, 84433, 915, 916, 917, 919, 920, 925, 926
GO:0009897	external side of plasma membrane	GOCC	192	0.0369287	1.25797	5.67537e-08	7.76044e-07	up in HPV(+)	1048, 10666, 10859, 1139, 115650, 1230, 1233, 1234, 1236, 124975, 1380, 1493, 154796, 1889, 2206, 2207, 2208, 2209, 2322, 2323, 23495, 2686, 2811, 2833, 29126, 2936, 29851, 3120, 3123, 3127, 3383, 343413, 3458, 355, 3559, 356, 3560, 3561, 3572, 3594, 3605, 3676, 3683, 3684, 3815, 3824, 5133, 51744, 57823, 5788, 6338, 6340, 6402, 643, 64805, 6504, 6517, 6693, 7124, 7293, 7412, 7852, 8741, 8764, 87…
GO:0032993	protein-DNA complex	GOCC	229	0.0346025	1.23991	8.74966e-08	1.17096e-06	up in HPV(+)	10274, 10320, 10403, 1060, 1063, 10714, 10734, 11004, 11130, 11169, 11339, 147841, 151246, 151648, 157570, 1786, 1788, 220134, 23047, 23122, 23157, 23244, 23421, 23468, 23649, 27085, 27127, 3070, 3087, 324, 340533, 348995, 3662, 378708, 387103, 4172, 4288, 4751, 4796, 50809, 5422, 5424, 5426, 5427, 54737, 54821, 55055, 55166, 55193, 55920, 57082, 6118, 64105, 64946, 6612, 6667, 6839, 701, 7175, 7…
GO:0097458	neuron part	GOCC	752	-0.024162	0.860573	1.806e-07	2.36662e-06	up in HPV(-)	100, 1006, 10109, 1012, 10188, 10272, 10371, 10409, 10458, 10490, 10518, 10540, 10642, 10769, 11075, 1131, 11332, 114088, 1258, 1400, 147700, 1515, 152, 1627, 1723, 1728, 1809, 1826, 1837, 1855, 1917, 2017, 2043, 2048, 2049, 2258, 2288, 22941, 23034, 23085, 23108, 23109, 23114, 23154, 2316, 23237, 23242, 23413, 23710, 24, 2535, 2550, 25791, 25814, 25828, 2596, 26012, 26232, 2664, 267, 26747, 274,…
GO:0044291	cell-cell contact zone	GOCC	49	-0.0691094	0.650842	2.28213e-07	2.9295e-06	up in HPV(-)	1000, 10052, 165904, 1674, 201163, 2258, 23363, 2697, 3688, 3728, 4619, 4892, 5058, 6324, 6330, 6331, 7414, 7533, 79026, 817, 83660, 83700
GO:0000775	chromosome, centromeric region	GOCC	155	0.0379025	1.2656	2.56408e-07	3.22562e-06	up in HPV(+)	10274, 10320, 10403, 1060, 1063, 10734, 11004, 11130, 11169, 11339, 147841, 151246, 151648, 157570, 1786, 1788, 220134, 23047, 23122, 23157, 23244, 23421, 23468, 27085, 27127, 3070, 324, 348995, 378708, 387103, 4288, 4751, 54821, 55055, 55166, 55193, 55920, 57082, 64105, 64946, 6612, 6839, 701, 7175, 79019, 79172, 79682, 79980, 8243, 84787, 8658, 9126, 91687, 9735, 9985
GO:0032432	actin filament bundle	GOCC	52	-0.066844	0.66007	4.02963e-07	4.96988e-06	up in HPV(-)	103910, 10398, 10627, 10634, 10801, 10979, 1410, 2275, 22885, 23002, 29109, 4624, 4625, 4627, 4628, 4638, 51474, 54751, 55740, 58, 5829, 6624, 7168, 7170, 7171, 7791, 9260
GO:0005654	nucleoplasm	GOCC	1362	0.0171321	1.11234	4.48042e-07	5.41959e-06	up in HPV(+)	100128927, 10013, 10051, 10062, 10181, 10236, 10250, 1027, 10274, 1029, 10309, 10499, 10569, 10592, 10636, 10714, 10721, 10907, 10919, 10943, 11052, 11073, 11100, 11168, 11169, 112399, 11262, 112869, 11339, 114034, 114799, 1153, 117143, 121642, 126382, 131870, 132660, 133522, 134353, 142, 144715, 148479, 149628, 157570, 1605, 1609, 1643, 1677, 1763, 1810, 1854, 1859, 1875, 204851, 2063, 2099, 210…
GO:0016460	myosin II complex	GOCC	23	-0.0850932	0.589299	5.71198e-07	6.77893e-06	up in HPV(-)	103910, 10398, 10627, 29895, 4619, 4620, 4621, 4624, 4625, 4626, 4627, 4628, 4632, 4634
GO:0031091	platelet alpha granule	GOCC	50	-0.0670163	0.659364	5.9499e-07	6.93054e-06	up in HPV(-)	1950, 2335, 2621, 3481, 351, 3690, 5054, 5154, 5155, 5270, 6622, 6678, 7040, 7042, 7057, 7058, 7076, 710, 7423, 7424, 88, 948
GO:0036477	somatodendritic compartment	GOCC	437	-0.0290931	0.834601	7.46023e-07	8.53179e-06	up in HPV(-)	100, 10188, 10371, 10490, 10642, 10769, 11075, 1131, 114088, 1400, 1515, 1627, 1723, 1728, 1855, 1917, 2017, 2043, 2048, 2049, 2258, 2288, 22941, 23034, 23109, 23154, 2316, 23237, 23242, 23413, 23710, 2550, 25814, 25828, 26012, 26232, 267, 2778, 282679, 2898, 2914, 29966, 347, 351, 3623, 3751, 383, 3908, 3916, 392617, 4131, 4133, 4311, 4628, 4651, 4692, 477, 4842, 4983, 5048, 5058, 5064, 5066, 50…
GO:0031093	platelet alpha granule lumen	GOCC	37	-0.0730707	0.635016	8.39526e-07	9.11135e-06	up in HPV(-)	1950, 2335, 2621, 3481, 351, 5054, 5154, 5155, 6678, 7040, 7042, 7057, 7076, 710, 7423, 7424, 88
GO:0042613	MHC class II protein complex	GOCC	14	0.063904	1.48756	8.18162e-07	9.11135e-06	up in HPV(+)	3108, 3109, 3111, 3112, 3113, 3117, 3118, 3119, 3120, 3122, 3123, 3127, 972
GO:0044428	nuclear part	GOCC	2357	0.0136102	1.08826	8.40156e-07	9.11135e-06	up in HPV(+)	10009, 100128927, 10013, 10036, 10042, 10051, 10062, 10181, 10236, 10250, 1027, 10274, 10283, 1029, 10293, 10309, 10336, 10388, 10389, 10403, 1047, 10472, 10499, 10521, 10569, 10592, 1060, 1063, 10636, 10714, 10721, 10733, 10734, 10741, 10865, 10905, 10907, 10919, 10943, 11052, 11073, 11100, 11124, 11144, 11168, 11169, 11180, 112399, 11262, 11277, 11284, 112869, 11322, 11339, 113510, 113878, 1140…
GO:0016020	membrane	GOCC	6580	-0.0105883	0.936316	1.02138e-06	1.0889e-05	up in HPV(-)	100, 1000, 1001, 100128731, 10016, 1002, 100287932, 10049, 100507588, 10052, 10056, 10058, 10059, 1006, 10060, 10061, 10071, 10072, 10082, 1009, 10090, 10096, 10100, 10105, 10109, 1012, 10128, 1013, 10130, 1014, 10162, 10165, 10175, 10186, 10188, 10197, 10204, 10211, 10226, 10227, 10237, 10244, 10252, 10294, 10299, 10319, 10328, 10330, 10345, 10371, 10391, 10395, 10400, 10409, 10410, 10411, 10413…
GO:0001725	stress fiber	GOCC	51	-0.0652817	0.66651	1.2307e-06	1.29019e-05	up in HPV(-)	103910, 10398, 10627, 10634, 10801, 10979, 2275, 22885, 23002, 29109, 4624, 4625, 4627, 4628, 4638, 51474, 54751, 55740, 58, 5829, 6624, 7168, 7170, 7171, 7791, 9260
GO:0031672	A band	GOCC	31	-0.0762266	0.622683	1.33398e-06	1.37553e-05	up in HPV(-)	10324, 127294, 131377, 2274, 23363, 23676, 286, 4619, 4620, 4633, 4634, 4635, 6271, 84676
GO:0005859	muscle myosin complex	GOCC	16	-0.0923628	0.563269	1.41409e-06	1.43461e-05	up in HPV(-)	10398, 29895, 4619, 4620, 4621, 4624, 4625, 4626, 4632, 4634
GO:0000785	chromatin	GOCC	314	0.028545	1.1941	1.69077e-06	1.68808e-05	up in HPV(+)	10036, 10062, 10274, 1029, 10320, 1060, 1063, 11168, 11240, 11339, 114799, 157570, 1677, 1786, 1788, 2099, 2146, 23047, 23076, 23081, 23126, 23244, 23383, 23411, 23466, 23468, 23492, 23512, 2551, 26013, 27022, 27085, 29128, 2956, 3070, 3150, 3151, 3398, 3622, 3659, 3662, 408, 4087, 4089, 4171, 4176, 4582, 4613, 4678, 5080, 50809, 5394, 5422, 54556, 5457, 54737, 55719, 55723, 56915, 57658, 57805, …
GO:0031981	nuclear lumen	GOCC	1996	0.0140052	1.09094	1.8582e-06	1.82626e-05	up in HPV(+)	10009, 100128927, 10013, 10036, 10051, 10062, 10181, 10236, 10250, 1027, 10274, 1029, 10293, 10309, 10388, 10403, 10472, 10499, 10521, 10569, 10592, 1060, 1063, 10636, 10714, 10721, 10733, 10734, 10741, 10865, 10905, 10907, 10919, 10943, 11052, 11073, 11100, 11144, 11168, 11169, 112399, 11262, 11277, 11284, 112869, 11339, 113510, 114034, 114799, 1153, 116986, 117143, 121642, 126382, 131870, 13266…
GO:0005921	gap junction	GOCC	21	-0.0838855	0.593739	2.85342e-06	2.76123e-05	up in HPV(-)	10052, 10804, 1627, 24145, 2697, 2707, 375519, 56666, 57165, 794
GO:0042383	sarcolemma	GOCC	92	-0.05169	0.725254	3.18606e-06	3.03641e-05	up in HPV(-)	10060, 10211, 10518, 113146, 1291, 1292, 1293, 1674, 1837, 1909, 2318, 274, 286, 302, 3688, 3908, 3916, 477, 4842, 5339, 5962, 6324, 633, 6331, 6442, 6444, 6445, 6640, 6717, 7430, 779, 79026, 81493, 817, 8291, 859, 8910, 8912, 9499, 966
GO:0030894	replisome	GOCC	24	0.0554777	1.41167	4.85058e-06	4.55376e-05	up in HPV(+)	10714, 23649, 340533, 4172, 4796, 5422, 5424, 5426, 5427, 6118
GO:0005794	Golgi apparatus	GOCC	1125	-0.0176336	0.896205	5.90934e-06	5.45761e-05	up in HPV(-)	10058, 10059, 10071, 10082, 10090, 10096, 10109, 10175, 10226, 10272, 10423, 10447, 10484, 10490, 10494, 10567, 10579, 10597, 10631, 10652, 10749, 1075, 10897, 10945, 10955, 10959, 10963, 10972, 11012, 11014, 11031, 11046, 11075, 11137, 11154, 11226, 11237, 11282, 114805, 117248, 1174, 118430, 120071, 1212, 1213, 121512, 1314, 1315, 136227, 1410, 1453, 1462, 1464, 146664, 1490, 1523, 152503, 1669…
GO:0044432	endoplasmic reticulum part	GOCC	868	-0.0197609	0.884435	5.98689e-06	5.45761e-05	up in HPV(-)	100128731, 10016, 10052, 10130, 10162, 10175, 10237, 10299, 10328, 10345, 10400, 10423, 10430, 10484, 10525, 10536, 10555, 1066, 10897, 10945, 10952, 10954, 10956, 10959, 10970, 10972, 10999, 11014, 11015, 11236, 11328, 11343, 114879, 125704, 126410, 1278, 1280, 1281, 1282, 1284, 1287, 1288, 1290, 1291, 1292, 1293, 1295, 129642, 13, 1300, 1301, 1303, 1305, 1306, 1308, 133022, 136227, 138311, 1548…
GO:0043601	nuclear replisome	GOCC	22	0.0559349	1.41568	7.18735e-06	6.45835e-05	up in HPV(+)	10714, 23649, 340533, 4172, 4796, 5422, 5424, 5426, 5427, 6118
GO:0043596	nuclear replication fork	GOCC	30	0.0523449	1.38445	7.91687e-06	7.01367e-05	up in HPV(+)	10714, 23649, 253714, 340533, 4172, 4796, 5111, 5422, 5424, 5426, 5427, 6118, 83637
GO:0042470	melanosome	GOCC	93	-0.0495176	0.735112	9.51935e-06	8.20229e-05	up in HPV(-)	10130, 10211, 10575, 10972, 10981, 1213, 23682, 27044, 2923, 302, 304, 3309, 3312, 3320, 3326, 3688, 3690, 3916, 4323, 483, 5034, 5479, 5862, 5878, 5901, 6386, 6509, 6513, 7054, 7184, 7306, 7529, 7531, 7534, 7879, 813, 89781, 9601
GO:0048770	pigment granule	GOCC	93	-0.0495176	0.735112	9.51935e-06	8.20229e-05	up in HPV(-)	10130, 10211, 10575, 10972, 10981, 1213, 23682, 27044, 2923, 302, 304, 3309, 3312, 3320, 3326, 3688, 3690, 3916, 4323, 483, 5034, 5479, 5862, 5878, 5901, 6386, 6509, 6513, 7054, 7184, 7306, 7529, 7531, 7534, 7879, 813, 89781, 9601
GO:0005865	striated muscle thin filament	GOCC	17	-0.0860118	0.585945	1.02571e-05	8.71854e-05	up in HPV(-)	29765, 58, 7134, 7135, 7136, 7137, 7138, 7139, 7140, 7168, 7169, 7170, 7171
GO:0042995	cell projection	GOCC	1208	-0.0165469	0.902278	1.16406e-05	9.76258e-05	up in HPV(-)	100, 1000, 1006, 10096, 10109, 1012, 10188, 1021, 10272, 10324, 10371, 10409, 10458, 10540, 10630, 10642, 1069, 1072, 10769, 10787, 10809, 10810, 10979, 10999, 11075, 11155, 1131, 11332, 114088, 1192, 1212, 121512, 123016, 1258, 127602, 128240, 129880, 134265, 1400, 1464, 147700, 1515, 152, 158135, 1627, 1738, 1767, 1770, 1778, 1809, 1826, 1837, 1855, 192668, 196385, 199221, 2017, 2028, 2043, 204…
GO:0098552	side of membrane	GOCC	265	0.0282229	1.19172	1.18162e-05	9.77945e-05	up in HPV(+)	1048, 10666, 10859, 1139, 115650, 120892, 1230, 1233, 1234, 1236, 124975, 1380, 1493, 154796, 1889, 2206, 2207, 2208, 2209, 2261, 2322, 2323, 23495, 26191, 2686, 2811, 2833, 29126, 2936, 29851, 3113, 3117, 3118, 3119, 3120, 3122, 3123, 3127, 3383, 343413, 3458, 355, 3551, 3559, 356, 3560, 3561, 3572, 3594, 3605, 3676, 3683, 3684, 3815, 3824, 5023, 5133, 51744, 56928, 5778, 57823, 5788, 6338, 6340…
GO:0005856	cytoskeleton	GOCC	1615	-0.0145674	0.913446	1.21369e-05	9.91442e-05	up in HPV(-)	10059, 10095, 10096, 10109, 10121, 10128, 10211, 10324, 10391, 103910, 10398, 10409, 1041, 10458, 10459, 10487, 10540, 10544, 10552, 10574, 10575, 10576, 10579, 10602, 10625, 10627, 10634, 10644, 1069, 1072, 1073, 10749, 10763, 10769, 10783, 10801, 10808, 10810, 10897, 10970, 10979, 11007, 11034, 11076, 11099, 11155, 114088, 115098, 119, 1198, 1213, 121391, 121512, 122786, 123016, 124590, 1264, 1…
GO:0030425	dendrite	GOCC	308	-0.030144	0.829167	1.28337e-05	0.000103492	up in HPV(-)	100, 10188, 10371, 10642, 10769, 1131, 114088, 1400, 1627, 1855, 2017, 2043, 2048, 2049, 2258, 22941, 23034, 23109, 23154, 2316, 23237, 23242, 23413, 23710, 2550, 25814, 25828, 26012, 26232, 267, 2778, 282679, 2898, 2914, 29966, 347, 351, 3751, 3908, 3916, 392617, 4131, 4133, 4311, 4628, 477, 4842, 4983, 5058, 5064, 50944, 5126, 51399, 5332, 54873, 5499, 55243, 55361, 55450, 5578, 5649, 57120, 57…
GO:0005901	caveola	GOCC	62	-0.0561233	0.705545	1.68585e-05	0.000134228	up in HPV(-)	1012, 1013, 10211, 10395, 112464, 1946, 2149, 26509, 284119, 30846, 3480, 3667, 477, 483, 6331, 6513, 6608, 7048, 7223, 775, 7804, 83483, 858, 859, 867, 8912, 949
GO:0034774	secretory granule lumen	GOCC	43	-0.0634226	0.674255	1.81984e-05	0.000143085	up in HPV(-)	1950, 2335, 2621, 3481, 351, 5054, 5122, 5126, 5154, 5155, 6678, 7040, 7042, 7057, 7076, 710, 7423, 7424, 88
GO:0000502	proteasome complex	GOCC	63	-0.055373	0.708843	2.06989e-05	0.000160736	up in HPV(-)	10197, 10213, 11047, 197131, 3300, 51371, 5684, 5687, 5688, 5689, 5691, 5693, 5694, 5695, 5700, 5701, 5702, 5705, 5708, 5709, 5713, 5715, 5717, 5718, 5719, 7979, 90637, 9491, 9690
GO:0005583	fibrillar collagen trimer	GOCC	13	-0.0907836	0.568824	2.14859e-05	0.000164813	up in HPV(-)	1278, 1280, 1281, 1290, 1301, 4060, 50509
GO:0005796	Golgi lumen	GOCC	65	-0.0546203	0.712166	2.21258e-05	0.000167676	up in HPV(-)	10071, 10082, 118430, 1462, 1464, 1673, 176, 2239, 2621, 2719, 27333, 2817, 4060, 4320, 4323, 4325, 4803, 5045, 5125, 5624, 633, 6383, 7040, 7473, 7475, 7476, 7477, 81029
GO:0001726	ruffle	GOCC	144	-0.0402827	0.778535	2.3672e-05	0.000177258	up in HPV(-)	1021, 10324, 10458, 10630, 1072, 121512, 2017, 2191, 23189, 23242, 23286, 23499, 23647, 2778, 2934, 302, 3678, 3688, 3690, 378, 4210, 4627, 4641, 4651, 4771, 4830, 4831, 5058, 50649, 51330, 51429, 51763, 55612, 57403, 5962, 6277, 64411, 7168, 7430, 81848, 83660, 8522, 91663, 9260, 9265, 9270, 9564
GO:0042555	MCM complex	GOCC	11	0.061897	1.46912	2.632e-05	0.000194768	up in HPV(+)	253714, 4171, 4172, 4173, 4174, 4175, 4176, 4796, 84515
GO:0031252	cell leading edge	GOCC	293	-0.0296443	0.831747	2.87832e-05	0.000210519	up in HPV(-)	1000, 10096, 10109, 1021, 10324, 10458, 10630, 10642, 1072, 10787, 10810, 10979, 11075, 121512, 1464, 1639, 1809, 2017, 2191, 22885, 23109, 23189, 23242, 23286, 23499, 23516, 23603, 23647, 23710, 2535, 26499, 273, 2778, 286, 2934, 29780, 29959, 302, 323, 3636, 3678, 3688, 3690, 3693, 378, 4163, 4210, 4627, 4628, 4638, 4641, 4642, 4651, 468, 4771, 4830, 4831, 5048, 5058, 5064, 50649, 51330, 51429,…
GO:0005840	ribosome	GOCC	197	-0.0347737	0.805651	3.52075e-05	0.000254546	up in HPV(-)	10196, 10573, 10884, 11222, 11224, 122704, 124995, 128308, 200916, 2197, 219927, 23, 26747, 28957, 28998, 29074, 29088, 3396, 347, 440275, 51069, 51081, 51116, 51258, 51264, 51373, 51642, 51649, 51650, 55168, 55173, 60488, 6123, 6134, 6136, 6137, 6143, 6154, 6155, 6166, 6167, 6169, 6170, 6173, 6181, 6182, 6183, 6187, 6191, 6204, 6217, 6227, 6230, 6231, 6238, 63875, 64928, 64969, 64975, 64979, 650…
GO:0016528	sarcoplasm	GOCC	59	-0.0554513	0.708498	3.59007e-05	0.000256608	up in HPV(-)	10345, 2280, 2318, 286, 3270, 4842, 5339, 5350, 56681, 57158, 57338, 6271, 6588, 6695, 6717, 7057, 779, 813, 817, 845, 8996
GO:0016459	myosin complex	GOCC	59	-0.0552515	0.709378	3.92134e-05	0.000277137	up in HPV(-)	103910, 10398, 10627, 29895, 4430, 4604, 4606, 4608, 4619, 4620, 4621, 4624, 4625, 4626, 4627, 4628, 4632, 4633, 4634, 4635, 4637, 4641, 4642, 4651, 84700
GO:0048471	perinuclear region of cytoplasm	GOCC	487	-0.0232532	0.865447	4.11353e-05	0.00028749	up in HPV(-)	10049, 10059, 1012, 10128, 1022, 10484, 10490, 10597, 10642, 10801, 10920, 10938, 10970, 11075, 11076, 11145, 11155, 11226, 1192, 1453, 1490, 1780, 19, 199720, 2009, 2181, 2288, 23108, 2316, 23242, 23286, 23363, 23413, 23560, 25814, 25819, 25824, 2589, 2590, 2591, 2597, 267, 27183, 2778, 2783, 284110, 2934, 29959, 302, 307, 30844, 30846, 3265, 340719, 347, 3482, 351, 3625, 3675, 375, 381, 3912, 3…
GO:0031983	vesicle lumen	GOCC	56	-0.0559831	0.70616	4.45685e-05	0.000304713	up in HPV(-)	100, 10525, 10808, 1950, 2335, 2621, 3320, 3481, 351, 5054, 5122, 5126, 5154, 5155, 6678, 7040, 7042, 7057, 7076, 710, 7184, 7423, 7424, 88
GO:0060205	cytoplasmic membrane-bounded vesicle lumen	GOCC	56	-0.0559831	0.70616	4.45685e-05	0.000304713	up in HPV(-)	100, 10525, 10808, 1950, 2335, 2621, 3320, 3481, 351, 5054, 5122, 5126, 5154, 5155, 6678, 7040, 7042, 7057, 7076, 710, 7184, 7423, 7424, 88
GO:0032982	myosin filament	GOCC	19	-0.0791474	0.611482	4.87139e-05	0.000329474	up in HPV(-)	4604, 4606, 4608, 4619, 4620, 4621, 4624, 4625, 4626, 4627, 4628
GO:0098589	membrane region	GOCC	1206	-0.0151564	0.910109	6.0304e-05	0.000403523	up in HPV(-)	1000, 100128731, 10016, 10052, 1012, 10128, 1013, 10130, 1014, 10162, 10175, 10211, 10237, 10299, 10328, 10345, 10395, 10400, 10423, 10430, 10484, 10555, 10630, 10804, 10897, 10945, 10952, 10954, 10956, 10959, 10970, 10972, 10999, 11014, 11015, 11236, 112464, 1131, 11328, 11343, 114879, 1212, 123016, 1244, 125704, 126410, 129642, 129880, 13, 133022, 138311, 1464, 154807, 1603, 1604, 1717, 1727, 1…
GO:0030141	secretory granule	GOCC	212	-0.0327169	0.816015	6.38056e-05	0.00042246	up in HPV(-)	10272, 10959, 10972, 1114, 1198, 148229, 1738, 1950, 23237, 2335, 25818, 26056, 26154, 2617, 2621, 27344, 306, 3329, 3481, 351, 3688, 3690, 3916, 3920, 4688, 5054, 5066, 51083, 5122, 5125, 5126, 5154, 5155, 5270, 55591, 5650, 5865, 6447, 6498, 6556, 6622, 6678, 6717, 6804, 6809, 6861, 6915, 6950, 7040, 7042, 7057, 7058, 7076, 710, 7423, 7424, 7857, 7879, 858, 88, 89781, 90423, 9043, 9066, 908, 91…
GO:0005923	tight junction	GOCC	94	0.0365865	1.2553	7.96906e-05	0.000516757	up in HPV(+)	10686, 117583, 120425, 1364, 1365, 1366, 137075, 1525, 153562, 154796, 1741, 23562, 260425, 27134, 324, 50855, 55870, 57530, 65266, 65267, 6904, 79778, 79983, 84552, 84612, 9071, 9223, 9414
GO:0070160	occluding junction	GOCC	94	0.0365865	1.2553	7.96906e-05	0.000516757	up in HPV(+)	10686, 117583, 120425, 1364, 1365, 1366, 137075, 1525, 153562, 154796, 1741, 23562, 260425, 27134, 324, 50855, 55870, 57530, 65266, 65267, 6904, 79778, 79983, 84552, 84612, 9071, 9223, 9414
GO:0043296	apical junction complex	GOCC	108	0.0349717	1.24276	8.69115e-05	0.00055783	up in HPV(+)	10686, 117583, 120425, 1364, 1365, 1366, 137075, 144100, 1495, 1525, 153562, 154796, 1741, 23562, 25945, 260425, 27134, 324, 50855, 5586, 55870, 57530, 65266, 65267, 6904, 79778, 79983, 84552, 84612, 85302, 9071, 9223, 9414
GO:0036379	myofilament	GOCC	20	-0.0761531	0.622967	9.09392e-05	0.000577786	up in HPV(-)	29765, 58, 7134, 7135, 7136, 7137, 7138, 7139, 7140, 7168, 7169, 7170, 7171
GO:0044297	cell body	GOCC	301	-0.027438	0.843229	9.86035e-05	0.000620216	up in HPV(-)	100, 10188, 10490, 10574, 10575, 10576, 11075, 11332, 128240, 1400, 1515, 1723, 1728, 1809, 1855, 1917, 2043, 2048, 2288, 22941, 22948, 23109, 23154, 2316, 23242, 23710, 25814, 25828, 26012, 267, 2783, 2898, 29966, 347, 3623, 383, 3916, 4133, 4628, 4651, 4692, 5048, 5066, 50940, 51083, 5126, 5373, 547, 5499, 55238, 55273, 55361, 55450, 5578, 57142, 57154, 57596, 5796, 5881, 5914, 6334, 6383, 6416…
GO:0044431	Golgi apparatus part	GOCC	688	-0.0188639	0.889379	0.000104186	0.000648843	up in HPV(-)	10071, 10082, 10090, 10096, 10175, 10423, 10484, 10631, 10652, 10897, 10945, 10959, 10972, 11031, 11046, 11226, 11237, 11282, 114805, 117248, 1174, 118430, 120071, 1212, 1213, 1314, 1315, 1462, 1464, 146664, 1523, 166929, 1673, 176, 2131, 2132, 222537, 2239, 22856, 23011, 23085, 2316, 23213, 23256, 23413, 23423, 23760, 25789, 2583, 2589, 2590, 2591, 259230, 26056, 26086, 2621, 26229, 2650, 2697, …
GO:0043025	neuronal cell body	GOCC	262	-0.0288966	0.83562	0.0001156	0.000712869	up in HPV(-)	100, 10188, 10490, 11075, 1400, 1515, 1723, 1728, 1855, 1917, 2043, 2048, 2288, 22941, 23109, 23154, 2316, 23242, 25814, 25828, 26012, 267, 2898, 29966, 347, 3623, 383, 3916, 4133, 4628, 4651, 4692, 5048, 5066, 50940, 51083, 5126, 5373, 547, 5499, 55238, 55273, 55361, 55450, 5578, 57142, 57154, 57596, 5796, 5881, 5914, 6334, 6383, 6416, 6509, 6608, 6620, 6653, 6861, 7040, 7042, 7054, 7077, 7150, …
GO:0016023	cytoplasmic membrane-bounded vesicle	GOCC	829	-0.0170377	0.89953	0.000137754	0.00083884	up in HPV(-)	100, 10059, 10130, 10188, 10211, 10272, 10447, 10484, 10490, 10525, 10567, 10575, 10652, 10808, 10938, 10945, 10959, 10971, 10972, 10981, 11031, 1114, 113146, 114088, 117248, 1174, 119, 1198, 1212, 1213, 1314, 1315, 148229, 1738, 1809, 1855, 19, 1950, 2098, 220082, 22822, 23011, 2312, 23237, 23256, 2335, 23423, 2348, 23677, 23682, 23710, 2535, 257364, 25818, 25977, 26056, 26154, 2617, 2621, 26503…
GO:0045202	synapse	GOCC	452	-0.0224191	0.869944	0.000138695	0.00083884	up in HPV(-)	1000, 10059, 1006, 10096, 10109, 1013, 10490, 10505, 10518, 10567, 1131, 1134, 11343, 114088, 1144, 1146, 1258, 1287, 1674, 1837, 1855, 1947, 2043, 2149, 22839, 22941, 23034, 23085, 23237, 23413, 23504, 2550, 2556, 2569, 2596, 26012, 26503, 26747, 27286, 273, 274, 284612, 286, 2898, 2914, 3084, 323, 351, 3675, 3678, 3688, 375, 3897, 3913, 392617, 399694, 4131, 4311, 4357, 4627, 4628, 4741, 477, 4…
GO:0031430	M band	GOCC	20	-0.0744063	0.629767	0.000161918	0.000969967	up in HPV(-)	10324, 127294, 2274, 23363, 23676, 286, 6271, 84676
GO:0001772	immunological synapse	GOCC	28	0.0485669	1.35232	0.00017063	0.00101251	up in HPV(+)	11151, 146206, 27040, 3001, 3002, 3383, 3683, 3932, 399, 5795, 7535, 84433, 916, 940, 951, 963
GO:0031410	cytoplasmic vesicle	GOCC	905	-0.0161161	0.904697	0.000176173	0.00103563	up in HPV(-)	100, 10016, 10059, 10130, 10188, 10211, 10272, 10447, 10484, 10490, 10525, 10548, 10567, 10575, 10652, 10808, 10938, 10945, 10959, 10971, 10972, 10981, 11031, 1114, 113146, 114088, 117248, 1174, 119, 1198, 1212, 1213, 1314, 1315, 148229, 1515, 1738, 1809, 1855, 19, 1950, 2028, 2098, 220082, 22822, 23011, 2312, 23237, 23256, 23299, 2335, 23413, 23423, 2348, 23677, 23682, 23710, 2535, 257364, 25818…
GO:0030427	site of polarized growth	GOCC	112	-0.0402573	0.778658	0.000183469	0.00106854	up in HPV(-)	10188, 10409, 10540, 10642, 11075, 1809, 1826, 1855, 2043, 2258, 2288, 22941, 23242, 25791, 2596, 267, 323, 3675, 3831, 4137, 4628, 4747, 5048, 5058, 55361, 57451, 57616, 57698, 5881, 6620, 6622, 6786, 6809, 7070, 7077, 8829, 8851, 8882, 91653, 9479, 9625
GO:0001518	voltage-gated sodium channel complex	GOCC	10	-0.0905741	0.569565	0.000188641	0.00108858	up in HPV(-)	55800, 6324, 6327, 6329, 6330, 6331, 6334, 6335
GO:0030426	growth cone	GOCC	111	-0.0400958	0.77944	0.000210146	0.00120165	up in HPV(-)	10188, 10409, 10540, 10642, 11075, 1809, 1826, 1855, 2043, 2258, 2288, 22941, 23242, 25791, 2596, 267, 323, 3675, 3831, 4137, 4628, 4747, 5048, 5058, 57451, 57616, 57698, 5881, 6620, 6622, 6786, 6809, 7070, 7077, 8829, 8851, 8882, 91653, 9479, 9625
GO:0044451	nucleoplasm part	GOCC	599	0.017707	1.11632	0.000240806	0.00136457	up in HPV(+)	10013, 10250, 1029, 10569, 10636, 10943, 11052, 11073, 112869, 11339, 114034, 117143, 133522, 149628, 1609, 1810, 1859, 204851, 2122, 2145, 2146, 2175, 2176, 2178, 2187, 2189, 22823, 23137, 23269, 23338, 2334, 23411, 23468, 23512, 23515, 2475, 253714, 25896, 25898, 26009, 26060, 26122, 26147, 27154, 27332, 2872, 30827, 3428, 3622, 378708, 4034, 4193, 4261, 4299, 4300, 4646, 473, 4796, 4968, 51147…
GO:0005801	cis-Golgi network	GOCC	35	-0.060974	0.684594	0.000247914	0.00139231	up in HPV(-)	10945, 10972, 11014, 1490, 23256, 26229, 27333, 2801, 3985, 51226, 51399, 54463, 57410, 58485, 79929, 83548, 9321, 9950
GO:0005838	proteasome regulatory particle	GOCC	15	-0.0790669	0.611788	0.000297113	0.00165384	up in HPV(-)	10213, 5700, 5705, 5708, 5709, 5713, 5715, 5717, 5718, 5719
GO:0022624	proteasome accessory complex	GOCC	23	-0.0690134	0.651231	0.000329929	0.00181166	up in HPV(-)	10197, 10213, 5700, 5701, 5702, 5705, 5708, 5709, 5713, 5715, 5717, 5718, 5719
GO:0030663	COPI-coated vesicle membrane	GOCC	13	-0.0820781	0.600445	0.000331226	0.00181166	up in HPV(-)	10945, 10959, 1314, 1315, 23423, 372, 51226, 57410
GO:0031594	neuromuscular junction	GOCC	45	-0.054906	0.710903	0.00035104	0.00190348	up in HPV(-)	1013, 10518, 1134, 1287, 1674, 2043, 2149, 3084, 351, 3688, 4627, 4628, 4741, 5270, 6640, 6695, 81493, 817, 859, 8851
GO:0044450	microtubule organizing center part	GOCC	100	0.0334977	1.23143	0.000372275	0.00200138	up in HPV(+)	10426, 10733, 11190, 117178, 121441, 132320, 134359, 152185, 163786, 22832, 25886, 282809, 347240, 3932, 5108, 5116, 51174, 51364, 54535, 54875, 55125, 55755, 55835, 672, 7153, 80254, 84376, 8481, 85302, 85444, 8658, 8924, 89891, 899, 9662, 9696, 9814
GO:0030137	COPI-coated vesicle	GOCC	16	-0.0763283	0.622289	0.000422098	0.00225	up in HPV(-)	10945, 10959, 10972, 1314, 1315, 23423, 372, 51226, 55690, 57410
GO:0005721	pericentric heterochromatin	GOCC	12	0.056062	1.4168	0.000455529	0.00240779	up in HPV(+)	10320, 1060, 157570, 1786, 23468, 3070
GO:0043197	dendritic spine	GOCC	80	-0.043596	0.762668	0.000462506	0.0024243	up in HPV(-)	10642, 2017, 2043, 22941, 23109, 23237, 26232, 351, 3751, 3908, 4131, 4628, 477, 4842, 4983, 5064, 50944, 54873, 5499, 57451, 729993, 88, 8851, 8898, 9127, 9912
GO:0042611	MHC protein complex	GOCC	25	0.047993	1.34751	0.000472586	0.00245667	up in HPV(+)	3108, 3109, 3111, 3112, 3113, 3117, 3118, 3119, 3120, 3122, 3123, 3127, 972
GO:0000790	nuclear chromatin	GOCC	192	0.0263876	1.1782	0.000508692	0.00262268	up in HPV(+)	10036, 10062, 11168, 157570, 1677, 1788, 2146, 23081, 23126, 23411, 23468, 23492, 23512, 2551, 27022, 29128, 2956, 3622, 3659, 3662, 4087, 4089, 4582, 4678, 5080, 54556, 5457, 54737, 55723, 57658, 57805, 5928, 5991, 6304, 6595, 6597, 6599, 6601, 6688, 7157, 79809, 81611, 8208, 84265, 84787, 864, 8914
GO:0072562	blood microparticle	GOCC	67	-0.0463765	0.749603	0.000517064	0.00264417	up in HPV(-)	10518, 10878, 1192, 12, 183, 2335, 23549, 253461, 2934, 308, 3312, 3848, 4478, 5216, 5705, 58, 590, 60, 6386, 6513, 70, 7040, 71, 710, 715, 716, 72, 7534, 84000, 8547
GO:0044391	ribosomal subunit	GOCC	130	-0.0353797	0.802622	0.00055692	0.00282502	up in HPV(-)	11222, 11224, 122704, 124995, 128308, 2197, 28957, 28998, 29088, 3396, 51081, 51116, 51258, 51264, 51373, 51650, 55168, 60488, 6123, 6134, 6136, 6137, 6143, 6154, 6155, 6167, 6169, 6170, 6173, 6181, 6182, 6183, 6187, 6191, 6204, 6217, 6227, 6230, 6231, 64975, 64979
GO:0044309	neuron spine	GOCC	82	-0.0424807	0.767973	0.0005993	0.00301568	up in HPV(-)	10642, 2017, 2043, 22941, 23109, 23237, 26232, 351, 3751, 3908, 4131, 4628, 477, 4842, 4983, 5064, 50944, 54873, 5499, 57451, 729993, 88, 8851, 8898, 9127, 9912
GO:0005942	phosphatidylinositol 3-kinase complex	GOCC	14	0.0537429	1.39653	0.000629451	0.00314226	up in HPV(+)	146850, 23533, 2475, 5289, 5291, 5294, 8503
GO:0031090	organelle membrane	GOCC	2354	-0.00970742	0.941456	0.000644686	0.00319297	up in HPV(-)	100128731, 10016, 100287932, 10052, 10058, 10059, 10090, 10096, 10105, 10128, 10130, 10162, 10165, 10175, 10188, 10211, 10226, 10237, 10244, 10299, 10328, 10345, 10400, 10410, 10423, 10430, 10440, 10476, 10484, 10490, 10493, 10548, 10555, 10632, 10651, 10652, 10897, 10938, 10945, 10952, 10953, 10954, 10956, 10959, 10970, 10971, 10972, 10981, 10999, 11014, 11015, 11031, 11046, 11194, 11226, 11236,…
GO:0005623	cell	GOCC	12073	0.0125012	1.08079	0.000695603	0.00339174	up in HPV(+)	10000, 100049587, 10009, 100101467, 100128927, 100129654, 10013, 100131390, 100131827, 100132417, 10018, 10020, 10023, 10026, 100289678, 100316904, 10036, 10042, 10044, 10048, 10051, 10062, 10075, 10077, 10087, 101, 10103, 10125, 10126, 10148, 10149, 10157, 10161, 10163, 10181, 10194, 10217, 10219, 10224, 10225, 10235, 10236, 10242, 10250, 10261, 1027, 10274, 10277, 1028, 10283, 1029, 10293, 1029…
GO:0044464	cell part	GOCC	12073	0.0125012	1.08079	0.000695603	0.00339174	up in HPV(+)	10000, 100049587, 10009, 100101467, 100128927, 100129654, 10013, 100131390, 100131827, 100132417, 10018, 10020, 10023, 10026, 100289678, 100316904, 10036, 10042, 10044, 10048, 10051, 10062, 10075, 10077, 10087, 101, 10103, 10125, 10126, 10148, 10149, 10157, 10161, 10163, 10181, 10194, 10217, 10219, 10224, 10225, 10235, 10236, 10242, 10250, 10261, 1027, 10274, 10277, 1028, 10283, 1029, 10293, 1029…
GO:0005793	endoplasmic reticulum-Golgi intermediate compartment	GOCC	63	-0.046106	0.750864	0.000826186	0.00399747	up in HPV(-)	10130, 10897, 10945, 10959, 10972, 1315, 23071, 2335, 23423, 290, 3309, 4121, 5034, 51226, 51290, 57410, 5862, 6836, 81876, 871, 90411
GO:0043256	laminin complex	GOCC	10	-0.0842707	0.592319	0.000955685	0.00458875	up in HPV(-)	284217, 3908, 3909, 3910, 3912, 3913, 3915, 3918
GO:0030315	T-tubule	GOCC	31	-0.0588203	0.693818	0.00103671	0.00494006	up in HPV(-)	113146, 1909, 274, 477, 5962, 6324, 6331, 6717, 7430, 779, 79026, 817, 8291, 859
GO:0030126	COPI vesicle coat	GOCC	11	-0.0814838	0.602668	0.00107407	0.00507965	up in HPV(-)	1314, 1315, 23423, 372, 51226, 57410
GO:0098588	bounding membrane of organelle	GOCC	1816	-0.0103073	0.937952	0.00111486	0.00523317	up in HPV(-)	100128731, 10016, 10052, 10058, 10059, 10090, 10096, 10128, 10130, 10162, 10175, 10211, 10226, 10237, 10244, 10299, 10328, 10345, 10400, 10410, 10423, 10430, 10484, 10490, 10493, 10548, 10555, 10651, 10652, 10897, 10938, 10945, 10952, 10953, 10954, 10956, 10959, 10970, 10972, 10981, 10999, 11014, 11015, 11031, 11046, 11226, 11236, 11237, 11267, 11282, 11328, 11343, 114805, 114879, 117248, 1174, 1…
GO:0005829	cytosol	GOCC	2479	-0.00900263	0.945588	0.00123318	0.0057128	up in HPV(-)	100, 10049, 10056, 10059, 10096, 10109, 10121, 10135, 10196, 10197, 10204, 1021, 10213, 10252, 10294, 103910, 10395, 10398, 10413, 10458, 10484, 10540, 10552, 10570, 10574, 10575, 10576, 10598, 10605, 10606, 10642, 10644, 10652, 1069, 10783, 10787, 10804, 10808, 10809, 10900, 10910, 10971, 10979, 11069, 11145, 11171, 11224, 11267, 112936, 113026, 11332, 114879, 1152, 115557, 1158, 117283, 1174, 1…
GO:0015934	large ribosomal subunit	GOCC	71	-0.0428007	0.766447	0.00124428	0.0057128	up in HPV(-)	11222, 11224, 122704, 124995, 128308, 28998, 29088, 3396, 51258, 51264, 6123, 6134, 6136, 6137, 6143, 6154, 6155, 6167, 6169, 6170, 6173, 6181, 6182, 64975, 64979
GO:0031258	lamellipodium membrane	GOCC	17	-0.070892	0.643672	0.00123744	0.0057128	up in HPV(-)	10630, 1072, 10787, 10979, 1464, 2191, 26499, 3690, 84168
GO:0005882	intermediate filament	GOCC	80	-0.0407738	0.776163	0.00126229	0.00575349	up in HPV(-)	10763, 121391, 126917, 1674, 22941, 2312, 23581, 2697, 286887, 3728, 374454, 3848, 3850, 3853, 3854, 3857, 3858, 3861, 3868, 4000, 4741, 4747, 5317, 5630, 631, 6509, 730755, 81493, 8829, 9119
GO:0005814	centriole	GOCC	70	0.0348239	1.24162	0.00137035	0.00620108	up in HPV(+)	10426, 10733, 11190, 121441, 132320, 134359, 152185, 163786, 22832, 25886, 282809, 347240, 5116, 51174, 54535, 54875, 55125, 55835, 7153, 80254, 8481, 85302, 85444, 8924, 89891, 899, 9662, 9696, 9814
GO:0014701	junctional sarcoplasmic reticulum membrane	GOCC	10	-0.0823182	0.59955	0.00149495	0.00671659	up in HPV(-)	10345, 57158, 57338, 845
GO:0043240	Fanconi anaemia nuclear complex	GOCC	10	0.0555081	1.41194	0.00154703	0.00690127	up in HPV(+)	2175, 2176, 2178, 2187, 2189, 378708, 55120
GO:0001673	male germ cell nucleus	GOCC	13	0.0526151	1.38678	0.0015766	0.00693484	up in HPV(+)	10734, 11073, 4292, 9985
GO:0005913	cell-cell adherens junction	GOCC	42	-0.0514121	0.726508	0.00157107	0.00693484	up in HPV(-)	1000, 1001, 165904, 1674, 2697, 3655, 3728, 3801, 4627, 4892, 7414, 7791, 83660
GO:0000777	condensed chromosome kinetochore	GOCC	83	0.0327018	1.22535	0.00161562	0.00705711	up in HPV(+)	10403, 1060, 1063, 11004, 11130, 147841, 151246, 151648, 220134, 23122, 23157, 23421, 348995, 378708, 387103, 4751, 54821, 55055, 57082, 64105, 64946, 701, 79019, 79172, 79682, 79980, 8243, 9735, 9985
GO:0016529	sarcoplasmic reticulum	GOCC	53	-0.0470049	0.746681	0.00163493	0.00709223	up in HPV(-)	10345, 2280, 286, 3270, 4842, 5350, 56681, 57158, 57338, 6271, 6588, 6717, 7057, 779, 813, 817, 845
GO:0071944	cell periphery	GOCC	3417	-0.00770984	0.953216	0.00186746	0.00804541	up in HPV(-)	100, 1000, 1001, 1002, 10052, 10058, 1006, 10060, 10061, 10071, 10072, 10082, 1009, 10100, 10109, 1012, 1013, 10130, 1014, 10165, 10188, 10211, 10244, 10252, 10330, 10345, 10395, 10409, 10410, 10411, 10423, 10458, 10486, 10487, 10501, 10505, 10518, 10539, 10544, 10567, 10617, 10630, 10652, 10681, 10699, 107, 1072, 10787, 10804, 10867, 10894, 10900, 10913, 10938, 10955, 10966, 10970, 10972, 10979,…
GO:0005922	connexon complex	GOCC	13	-0.075058	0.627221	0.00192509	0.00823731	up in HPV(-)	10052, 10804, 2697, 2707, 375519, 57165
GO:0005811	lipid particle	GOCC	48	-0.047984	0.742151	0.00206041	0.00868716	up in HPV(-)	10226, 10938, 10970, 1727, 2167, 2181, 2597, 302, 3654, 51097, 54947, 55102, 5878, 5908, 79888, 858, 90627
GO:0030057	desmosome	GOCC	22	-0.0632301	0.675062	0.00207166	0.00868716	up in HPV(-)	1041, 11187, 3728, 5317, 64065, 83700
GO:0044463	cell projection part	GOCC	588	-0.0161703	0.904393	0.00206233	0.00868716	up in HPV(-)	100, 1006, 10188, 10272, 10409, 10540, 10630, 10642, 1069, 1072, 10787, 10979, 10999, 11075, 1131, 1212, 123016, 1258, 129880, 1464, 147700, 152, 1767, 1770, 1809, 1826, 1855, 192668, 199221, 2017, 2043, 2191, 2258, 22873, 2288, 22919, 22941, 23109, 23114, 2316, 23189, 23237, 23242, 23286, 2348, 23499, 23710, 24, 2535, 25791, 2596, 26232, 26499, 267, 2736, 274, 2768, 286, 2914, 2947, 323, 3326, 3…
GO:0030660	Golgi-associated vesicle membrane	GOCC	36	-0.053121	0.718833	0.00219013	0.00912314	up in HPV(-)	10945, 10959, 1174, 1212, 1213, 1314, 1315, 23423, 2697, 372, 51226, 55738, 57410, 8218
GO:0044422	organelle part	GOCC	5934	-0.00661361	0.959732	0.00227622	0.00940899	up in HPV(-)	100, 100128731, 10016, 100287932, 10049, 10052, 10058, 10059, 10060, 10061, 10071, 10082, 10090, 10095, 10096, 10105, 10109, 10121, 10128, 10130, 10162, 10165, 10175, 10188, 10197, 10200, 10202, 10204, 10211, 10213, 1022, 10226, 10237, 10244, 10248, 10295, 10299, 10324, 10328, 10345, 10360, 103910, 10398, 10400, 10409, 10410, 10413, 10423, 10430, 10436, 10438, 10440, 10459, 10476, 10484, 10487, 1…
GO:0044430	cytoskeletal part	GOCC	1152	-0.0117609	0.929518	0.00228867	0.00940899	up in HPV(-)	10059, 10095, 10096, 10109, 10121, 10128, 10211, 103910, 10398, 10459, 10487, 10540, 10544, 10574, 10575, 10576, 10579, 10627, 10634, 1069, 1072, 10749, 10763, 10769, 10783, 10801, 10808, 10897, 10979, 11007, 11034, 11076, 115098, 119, 1213, 121391, 123016, 126917, 127602, 127829, 129880, 134265, 1400, 1410, 1453, 147700, 1613, 1627, 1639, 1674, 171568, 1767, 1770, 1778, 1780, 1781, 1783, 1809, 1…
GO:0098644	complex of collagen trimers	GOCC	11	-0.0780118	0.615812	0.00233988	0.00955705	up in HPV(-)	1282, 1284, 1287, 1288, 1291, 1293, 1295
GO:0016605	PML body	GOCC	85	0.0316173	1.21712	0.00239862	0.00973376	up in HPV(+)	10636, 11073, 204851, 23137, 23411, 23468, 23515, 2475, 2872, 4034, 4261, 51588, 55743, 6118, 6304, 6497, 6612, 6670, 7157, 79677, 8554, 9063, 94241, 9641, 9994
GO:0003677	DNA binding	GOMF	2007	0.0328066	1.22615	1.30264e-27	1.24271e-24	up in HPV(+)	100101467, 100128927, 100129654, 10013, 100131390, 100131827, 100289635, 100289678, 10042, 10062, 10075, 10181, 10194, 10224, 10250, 10270, 1029, 10320, 10388, 10389, 10472, 10481, 10522, 10538, 1060, 10657, 10721, 10745, 10781, 10782, 10847, 10865, 10943, 11004, 1105, 11063, 11073, 11144, 11168, 11169, 11218, 11262, 11284, 113835, 114803, 115196, 115560, 116412, 117608, 118738, 121274, 121549, 1…
GO:0005198	structural molecule activity	GOMF	508	-0.0441487	0.760053	4.15024e-17	1.97967e-14	up in HPV(-)	10095, 10096, 10109, 10319, 10381, 10398, 10573, 10763, 10884, 11117, 11222, 11224, 119, 1212, 1213, 121391, 122961, 124995, 1277, 1278, 1280, 1281, 1282, 128308, 1287, 1288, 1289, 1290, 1301, 1303, 1306, 1311, 1314, 1315, 1410, 1674, 176, 182, 200916, 2197, 219927, 2200, 2201, 22941, 2312, 23286, 26287, 284217, 286, 286887, 28998, 29074, 29088, 29775, 29895, 30008, 3728, 374454, 3850, 3853, 3854…
GO:0005509	calcium ion binding	GOMF	531	-0.0381089	0.789124	3.84014e-13	1.22116e-10	up in HPV(-)	1000, 1001, 1002, 1006, 10085, 1009, 1012, 1013, 1014, 10165, 103910, 10398, 10518, 10627, 1069, 10938, 11167, 113026, 11328, 114780, 126638, 1311, 144406, 1462, 147372, 147968, 1608, 182, 1823, 1837, 1950, 2009, 2200, 2201, 2202, 222663, 2312, 23213, 23413, 25769, 2591, 26167, 2621, 26548, 27253, 28514, 2934, 29895, 30008, 302, 304, 306, 308, 30844, 312, 3241, 3270, 3309, 338324, 341640, 3714, 3…
GO:0008092	cytoskeletal protein binding	GOMF	669	-0.0336854	0.811118	2.28194e-12	5.44242e-10	up in HPV(-)	10095, 10096, 10109, 10128, 10391, 10458, 10486, 10487, 10540, 10552, 10602, 10634, 1069, 1072, 1073, 10749, 10783, 10808, 10810, 11034, 11076, 1108, 11155, 116154, 119, 124590, 1264, 127829, 129446, 1410, 142678, 147700, 1627, 165904, 1674, 1780, 1861, 2009, 2010, 2258, 2275, 2288, 22885, 22919, 22921, 22998, 23012, 23022, 2314, 2316, 23164, 2318, 23242, 23281, 23363, 23603, 23710, 24145, 2597, …
GO:0003676	nucleic acid binding	GOMF	3313	0.0156301	1.10201	4.08869e-10	7.80123e-08	up in HPV(+)	100101467, 100128927, 100129654, 10013, 100131390, 100131827, 100132406, 100289635, 100289678, 10042, 10062, 10075, 10181, 10194, 10224, 10236, 10250, 10270, 1029, 10320, 10388, 10389, 10425, 10472, 10481, 105, 10521, 10522, 10535, 10538, 10569, 1060, 10656, 10657, 10659, 10721, 10745, 10781, 10782, 10847, 10865, 10915, 10943, 11004, 11022, 1105, 11052, 11063, 11073, 11100, 11144, 11151, 11168, 1…
GO:0008307	structural constituent of muscle	GOMF	40	-0.081012	0.604437	1.18138e-09	1.87839e-07	up in HPV(-)	10398, 26287, 29895, 4604, 4606, 4608, 4626, 4632, 4633, 4634, 4637, 5339, 6525, 7168, 7169, 7171, 7273, 8048, 8557, 88, 91624, 9499
GO:0005518	collagen binding	GOMF	56	-0.0709139	0.643584	6.87827e-09	9.37409e-07	up in HPV(-)	1311, 131578, 147372, 1513, 1514, 22801, 2335, 3675, 3688, 4060, 4322, 4811, 50509, 5058, 51144, 5118, 5154, 5155, 5479, 54829, 64175, 6678, 7057, 7092, 84168, 871, 9289, 960
GO:0044822	poly(A) RNA binding	GOMF	1071	-0.0228891	0.867407	9.37605e-09	1.11809e-06	up in HPV(-)	10102, 10128, 10209, 10248, 10360, 10436, 10528, 10539, 10573, 10575, 10642, 10644, 10749, 10813, 10849, 10884, 10923, 10929, 10940, 10952, 10963, 10969, 10970, 10992, 11056, 11072, 11171, 11222, 11224, 11333, 114049, 115098, 118460, 1213, 124245, 124995, 132, 132864, 138428, 1653, 1656, 165904, 1662, 1728, 1736, 1964, 1965, 1981, 1983, 1984, 2079, 219654, 2197, 219927, 221662, 22827, 2288, 22919…
GO:0004222	metalloendopeptidase activity	GOMF	86	-0.0600221	0.688656	2.67752e-08	2.83817e-06	up in HPV(-)	10531, 11096, 11173, 11174, 140766, 170689, 170690, 2191, 23203, 388630, 4311, 4313, 4314, 4316, 4319, 4322, 4325, 4326, 5251, 54507, 57486, 649, 7092, 7093, 79875, 80070, 8038, 81792, 9313, 9507, 9509, 9510, 9718, 9986
GO:0003779	actin binding	GOMF	344	-0.0344454	0.807296	1.0039e-07	8.70651e-06	up in HPV(-)	10095, 10096, 10109, 10391, 10486, 10487, 10552, 1072, 1073, 10810, 11034, 116154, 119, 1264, 129446, 142678, 1627, 165904, 2010, 2275, 22885, 22921, 22998, 23012, 23022, 2314, 2316, 23164, 2318, 23242, 23603, 24145, 27, 2764, 29109, 2934, 29765, 29780, 3636, 3688, 4210, 442721, 4430, 4478, 4604, 4606, 4619, 4620, 4621, 4624, 4625, 4626, 4627, 4633, 4634, 4635, 4638, 4641, 4642, 4644, 4771, 4892,…
GO:1901363	heterocyclic compound binding	GOMF	4938	0.0121631	1.07852	9.41694e-08	8.70651e-06	up in HPV(+)	10000, 100101467, 100128927, 100129654, 10013, 100131390, 100131827, 100132406, 10020, 100289635, 100289678, 10042, 10051, 10062, 10075, 10112, 1017, 10181, 10194, 10224, 10236, 10243, 10250, 10270, 1029, 10320, 10347, 10388, 10389, 10396, 10420, 10425, 10461, 10472, 10481, 105, 10521, 10522, 10535, 10538, 10569, 10592, 10595, 1060, 10656, 10657, 10659, 10693, 10721, 10733, 10745, 10781, 10782, 1…
GO:0097159	organic cyclic compound binding	GOMF	4984	0.0117517	1.07577	2.34546e-07	1.86464e-05	up in HPV(+)	10000, 100101467, 100128927, 100129654, 10013, 100131390, 100131827, 100132406, 10020, 100289635, 100289678, 10042, 10051, 10062, 10075, 10112, 1017, 10181, 10194, 10224, 10236, 10243, 10250, 10270, 1029, 10320, 10347, 10388, 10389, 10396, 10420, 10425, 10461, 10472, 10481, 105, 10521, 10522, 10535, 10538, 10569, 10592, 10595, 1060, 10656, 10657, 10659, 10693, 10721, 10733, 10745, 10781, 10782, 1…
GO:0003723	RNA binding	GOMF	1401	-0.0177153	0.89575	6.63218e-07	4.73873e-05	up in HPV(-)	10056, 10102, 10128, 10200, 10209, 10248, 10360, 10436, 10438, 10480, 10528, 10539, 10573, 10575, 10605, 10642, 10644, 10749, 10813, 10849, 10884, 10923, 10929, 10930, 10940, 10952, 10963, 10969, 10970, 10992, 11056, 11072, 11171, 11222, 11224, 11269, 11333, 114049, 115098, 118460, 1213, 124245, 124995, 132, 132864, 138428, 16, 1653, 1656, 165904, 1662, 1728, 1736, 1746, 1917, 1936, 1964, 1965, 1…
GO:0008083	growth factor activity	GOMF	113	-0.0499236	0.73326	7.94755e-07	4.73873e-05	up in HPV(-)	1437, 1490, 182, 183, 1839, 1950, 2069, 2202, 2250, 2258, 2259, 22943, 23529, 255324, 2668, 2764, 29937, 29948, 3084, 3481, 353500, 3569, 3589, 3623, 3624, 3625, 3714, 374, 392255, 3976, 4803, 4909, 5154, 5155, 56034, 6320, 649, 650, 652, 7039, 7040, 7042, 7076, 7423, 7424, 7873, 8909, 9048, 9135
GO:0015175	neutral amino acid transmembrane transporter activity	GOMF	19	-0.0881467	0.578222	7.72673e-07	4.73873e-05	up in HPV(-)	10955, 23428, 23657, 347735, 55117, 55238, 6509, 6520, 92745
GO:0048407	platelet-derived growth factor binding	GOMF	11	-0.102517	0.528822	7.71837e-07	4.73873e-05	up in HPV(-)	1277, 1278, 1280, 1281, 1282, 1289, 1291, 5154, 5155, 5159
GO:0005520	insulin-like growth factor binding	GOMF	23	-0.082546	0.598702	1.23077e-06	6.90681e-05	up in HPV(-)	1490, 3482, 3485, 3486, 3487, 3488, 3489, 3490, 3491, 51232, 5654, 8840, 94031
GO:0019838	growth factor binding	GOMF	111	-0.0489732	0.737603	1.80069e-06	9.54366e-05	up in HPV(-)	10952, 1277, 1278, 1280, 1281, 1282, 1289, 1291, 135228, 1490, 27286, 2817, 3482, 3485, 3486, 3487, 3488, 3489, 3490, 3491, 3570, 4052, 5045, 51232, 5154, 5155, 5159, 5654, 6187, 6331, 7046, 7048, 7057, 83888, 8829, 8840, 90, 9158, 9180, 94031, 948, 9982
GO:0001071	nucleic acid binding transcription factor activity	GOMF	906	0.0182445	1.12006	2.6291e-06	0.000127231	up in HPV(+)	100101467, 100131827, 100289635, 10062, 10320, 10389, 10472, 10538, 10745, 10782, 10902, 10943, 11063, 11262, 115560, 117608, 118738, 121274, 124961, 137814, 140612, 144455, 145873, 147923, 147929, 158431, 1628, 162962, 162966, 163131, 163255, 168620, 1869, 1870, 1875, 195828, 199704, 1999, 2005, 2063, 2099, 2103, 2117, 2120, 2122, 220929, 22797, 22806, 22809, 22835, 22882, 2290, 2298, 2301, 2301…
GO:0003700	sequence-specific DNA binding transcription factor activity	GOMF	905	0.0182406	1.12003	2.66733e-06	0.000127231	up in HPV(+)	100101467, 100131827, 100289635, 10062, 10320, 10389, 10472, 10538, 10745, 10782, 10902, 10943, 11063, 11262, 115560, 117608, 118738, 121274, 124961, 137814, 140612, 144455, 145873, 147923, 147929, 158431, 1628, 162962, 162966, 163131, 163255, 168620, 1869, 1870, 1875, 195828, 199704, 1999, 2005, 2063, 2099, 2103, 2117, 2120, 2122, 220929, 22797, 22806, 22809, 22835, 22882, 2290, 2298, 2301, 2301…
GO:0005201	extracellular matrix structural constituent	GOMF	55	-0.0616332	0.681795	2.93543e-06	0.000133353	up in HPV(-)	11117, 1277, 1278, 1280, 1281, 1282, 1287, 1288, 1289, 1290, 1301, 1303, 1306, 1311, 176, 2200, 2201, 284217, 30008, 3910, 3912, 3915, 4060, 4148, 4256, 50509, 633, 7286, 7837, 8076
GO:0008237	metallopeptidase activity	GOMF	146	-0.0427475	0.766701	4.55316e-06	0.000197442	up in HPV(-)	10072, 10213, 10531, 10617, 11096, 11173, 11174, 140766, 165, 170689, 170690, 2028, 2191, 23203, 2346, 23549, 290, 388630, 4311, 4313, 4314, 4316, 4319, 4322, 4325, 4326, 5069, 5119, 51200, 5251, 54507, 56265, 57486, 6051, 60676, 649, 7092, 7093, 79875, 80070, 8038, 81792, 92949, 9313, 9507, 9509, 9510, 9718, 9986
GO:0003785	actin monomer binding	GOMF	15	-0.0883136	0.577623	9.10236e-06	0.00037755	up in HPV(-)	23242, 27, 4633, 4634, 4635, 51474, 5217, 63876
GO:0038023	signaling receptor activity	GOMF	662	0.0193022	1.12745	9.57483e-06	0.000380599	up in HPV(+)	10062, 10148, 10149, 10161, 10261, 10266, 10333, 10347, 10461, 10663, 10902, 11126, 11188, 11314, 1139, 1143, 116379, 116443, 1230, 1233, 1234, 1235, 1236, 1237, 1240, 126259, 1268, 1269, 134, 135, 1364, 1365, 1378, 1380, 1436, 1439, 1441, 150372, 151, 1512, 1524, 155, 165082, 165140, 1880, 1951, 202018, 2051, 2057, 2063, 2065, 2099, 2103, 2123, 2185, 2207, 2209, 2210, 221188, 2219, 2261, 22953, …
GO:0005179	hormone activity	GOMF	48	-0.0617409	0.681339	1.12271e-05	0.000428427	up in HPV(-)	100506013, 1114, 1314, 133, 183, 1906, 2520, 252995, 2922, 3481, 3623, 3624, 3625, 388581, 3972, 51083, 5744, 6343, 8614, 885, 8862, 90226
GO:0004872	receptor activity	GOMF	857	0.0167511	1.10971	2.53798e-05	0.000931245	up in HPV(+)	10062, 10148, 10149, 10161, 10219, 10261, 10266, 10333, 10347, 10461, 10497, 10663, 10902, 11006, 11126, 11188, 11314, 1139, 1143, 114836, 116379, 116443, 1230, 1233, 1234, 1235, 1236, 1237, 1240, 124222, 126259, 1268, 1269, 134, 135, 1364, 1365, 1378, 1380, 1436, 1439, 1441, 150372, 151, 1512, 151888, 1524, 1525, 154796, 155, 1605, 165082, 165140, 1880, 1951, 202018, 2051, 2057, 2063, 2065, 2099…
GO:0003735	structural constituent of ribosome	GOMF	142	-0.0399528	0.780133	3.08886e-05	0.00105242	up in HPV(-)	10573, 10884, 11222, 11224, 124995, 128308, 200916, 2197, 219927, 28998, 29074, 29088, 51069, 51116, 51258, 51264, 51373, 51649, 51650, 55168, 6123, 6132, 6134, 6136, 6137, 6143, 6154, 6155, 6166, 6167, 6169, 6170, 6173, 6181, 6182, 6183, 6187, 6191, 6217, 6227, 6230, 6231, 63875, 64928, 64960, 64969, 64975, 64979, 9553
GO:0003924	GTPase activity	GOMF	195	-0.0351724	0.803657	2.99891e-05	0.00105242	up in HPV(-)	10059, 10381, 10681, 10801, 10938, 10981, 11031, 116988, 127829, 148252, 1917, 1983, 22800, 22931, 23011, 23433, 23551, 23560, 23682, 23708, 25923, 2768, 2770, 2778, 2783, 2790, 2791, 28511, 29984, 30844, 375, 379, 381, 388, 402, 51655, 5413, 57381, 57403, 5861, 5862, 5878, 5881, 5899, 5901, 5908, 6236, 64284, 6729, 6734, 7277, 7280, 7732, 7846, 7879, 84617, 84790, 9077, 9669
GO:0004175	endopeptidase activity	GOMF	288	-0.0294326	0.832842	3.93e-05	0.00125667	up in HPV(-)	10531, 10699, 1075, 11012, 11096, 11098, 11173, 11174, 11202, 140766, 147968, 1513, 1514, 1515, 151516, 170689, 170690, 2191, 23203, 23581, 23621, 25807, 25818, 27429, 284366, 2923, 388630, 4018, 4311, 4313, 4314, 4316, 4319, 4322, 4325, 4326, 43847, 5045, 5069, 5122, 5125, 5126, 5251, 5328, 54507, 55486, 5550, 5624, 5650, 5653, 5654, 5655, 5682, 5684, 5687, 5688, 5689, 5691, 5693, 5694, 5695, 57…
GO:0004896	cytokine receptor activity	GOMF	72	0.0344639	1.23885	3.95179e-05	0.00125667	up in HPV(+)	10148, 10663, 116379, 1230, 1233, 1234, 1235, 1236, 1237, 1240, 1439, 1441, 1524, 2057, 2322, 2826, 2833, 3454, 3455, 3559, 3560, 3561, 3568, 3572, 3579, 3587, 3588, 3590, 3593, 3594, 3977, 50615, 55540, 643, 729230, 7852, 84818, 9034, 9466, 972
GO:0004861	cyclin-dependent protein serine/threonine kinase inhibitor activity	GOMF	12	0.0440225	1.31467	5.99687e-05	0.00173364	up in HPV(+)	1027, 1028, 1029, 1031, 1032, 836, 8850
GO:0008376	acetylgalactosaminyltransferase activity	GOMF	31	-0.0669453	0.659655	5.95122e-05	0.00173364	up in HPV(-)	11226, 114805, 117248, 22856, 2583, 2589, 2590, 2591, 283358, 338707, 374378, 54480, 55454, 55568, 79586
GO:0044325	ion channel binding	GOMF	73	-0.0500103	0.732865	5.96535e-05	0.00173364	up in HPV(-)	10060, 2258, 2273, 2280, 23630, 24145, 3270, 3326, 4842, 55690, 55800, 57120, 6281, 6330, 6331, 6640, 6717, 7531, 7533, 817, 8557, 859, 87, 88, 9472, 9783
GO:0001968	fibronectin binding	GOMF	23	-0.0728657	0.635825	7.28476e-05	0.00204402	up in HPV(-)	10272, 131578, 1490, 1513, 1514, 284297, 3486, 3488, 3675, 3688, 3690, 4018, 4237, 51144, 6423, 7057
GO:0003684	damaged DNA binding	GOMF	52	0.0352939	1.24525	8.06634e-05	0.00219865	up in HPV(+)	10721, 11284, 1643, 2189, 2237, 2956, 3148, 4436, 4968, 51426, 51455, 5429, 55247, 56852, 6118, 7157, 7161, 7508, 7515
GO:0016712	oxidoreductase activity, acting on paired donors, with incorporation or reduction of molecular oxygen, reduced flavin or flavoprotein as one donor, and incorporation of one atom of oxygen	GOMF	13	0.0426895	1.30382	8.77888e-05	0.0023264	up in HPV(+)	1545, 1571, 1573, 1580, 199974, 260293
GO:0008227	G-protein coupled amine receptor activity	GOMF	17	-0.0781894	0.615133	0.000121107	0.00309895	up in HPV(-)	1131, 152, 3269, 3352, 3358, 3363
GO:0016538	cyclin-dependent protein serine/threonine kinase regulator activity	GOMF	21	0.0396054	1.27907	0.000123438	0.00309895	up in HPV(+)	1027, 1028, 1029, 1031, 1032, 81928, 836, 8850, 9134
GO:0005200	structural constituent of cytoskeleton	GOMF	81	-0.0460492	0.751129	0.000149706	0.00366204	up in HPV(-)	10095, 10096, 10109, 10381, 1674, 286, 3853, 3854, 3857, 3861, 3868, 4137, 4478, 4741, 4747, 54566, 58, 60, 631, 636, 71, 7139, 7168, 7277, 7280, 7846, 84617, 84790
GO:0004871	signal transducer activity	GOMF	938	0.0144357	1.09386	0.000188728	0.00439139	up in HPV(+)	10062, 10148, 10149, 10161, 10261, 10266, 1027, 10293, 10333, 10347, 10461, 10475, 10497, 10499, 10636, 10663, 10902, 11126, 11184, 11188, 11314, 1139, 1143, 116, 116379, 116443, 1230, 1233, 1234, 1235, 1236, 1237, 1240, 126259, 1268, 1269, 1326, 134, 135, 1364, 1365, 1378, 1380, 1436, 1439, 1441, 150372, 151, 1512, 1524, 155, 165082, 165140, 1796, 1880, 1951, 202018, 2051, 2057, 2063, 2065, 2099…
GO:0060089	molecular transducer activity	GOMF	938	0.0144357	1.09386	0.000188728	0.00439139	up in HPV(+)	10062, 10148, 10149, 10161, 10261, 10266, 1027, 10293, 10333, 10347, 10461, 10475, 10497, 10499, 10636, 10663, 10902, 11126, 11184, 11188, 11314, 1139, 1143, 116, 116379, 116443, 1230, 1233, 1234, 1235, 1236, 1237, 1240, 126259, 1268, 1269, 1326, 134, 135, 1364, 1365, 1378, 1380, 1436, 1439, 1441, 150372, 151, 1512, 1524, 155, 165082, 165140, 1796, 1880, 1951, 202018, 2051, 2057, 2063, 2065, 2099…
GO:0042393	histone binding	GOMF	123	0.0275669	1.18687	0.000236799	0.00537872	up in HPV(+)	10600, 10943, 1105, 112869, 114803, 148479, 22823, 23038, 23133, 23411, 23468, 23492, 23512, 26013, 26147, 29128, 2956, 3621, 3622, 3717, 4171, 4678, 4796, 51147, 51460, 5252, 54454, 54556, 54737, 54892, 55023, 55170, 55705, 55723, 5579, 5928, 6595, 6597, 7913, 8019, 81611, 8208, 84295, 90780
GO:0070330	aromatase activity	GOMF	12	0.0408211	1.28877	0.000256901	0.00569962	up in HPV(+)	1545, 1573, 1580, 199974, 260293
GO:0003682	chromatin binding	GOMF	367	0.0197047	1.13027	0.000298092	0.00639343	up in HPV(+)	10274, 10499, 1063, 10865, 11168, 11169, 114803, 148479, 1786, 1788, 2005, 201973, 2099, 2140, 2145, 2146, 22893, 22907, 23133, 23468, 23492, 23512, 23598, 23636, 2551, 26009, 26013, 26471, 27319, 29128, 2956, 3015, 3070, 3087, 3150, 3151, 3622, 3642, 3670, 378708, 4087, 4089, 4211, 4602, 4603, 473, 4851, 4998, 5080, 51087, 51316, 51317, 5422, 5424, 5426, 55193, 55758, 55777, 5579, 55814, 55870, …
GO:0010576	metalloenzyme regulator activity	GOMF	12	-0.0833108	0.595863	0.000301577	0.00639343	up in HPV(-)	26998, 50859, 6423, 6695, 7076, 7077, 7078, 8434
GO:0001637	G-protein coupled chemoattractant receptor activity	GOMF	21	0.0376624	1.26372	0.000320279	0.00650099	up in HPV(+)	10663, 1230, 1233, 1234, 1235, 1236, 1237, 1240, 1524, 2826, 2833, 3579, 643, 729230, 7852, 9034
GO:0004950	chemokine receptor activity	GOMF	21	0.0376624	1.26372	0.000320279	0.00650099	up in HPV(+)	10663, 1230, 1233, 1234, 1235, 1236, 1237, 1240, 1524, 2826, 2833, 3579, 643, 729230, 7852, 9034
GO:0004888	transmembrane signaling receptor activity	GOMF	575	0.0166791	1.10922	0.000339138	0.00668512	up in HPV(+)	10148, 10149, 10161, 10261, 10333, 10347, 10461, 10663, 11126, 11188, 1139, 1143, 116379, 116443, 1230, 1233, 1234, 1235, 1236, 1237, 1240, 1268, 1269, 134, 135, 1364, 1365, 1378, 1380, 1436, 1439, 1441, 150372, 151, 1512, 1524, 155, 165082, 165140, 1880, 1951, 202018, 2051, 2057, 2065, 2123, 2185, 2207, 2209, 2210, 221188, 2261, 22953, 2322, 23266, 2359, 2487, 2558, 2562, 2567, 26212, 266977, 27…
GO:0046332	SMAD binding	GOMF	62	-0.0486884	0.73891	0.000343366	0.00668512	up in HPV(-)	1278, 1281, 1290, 2280, 22938, 2316, 2626, 27063, 28996, 4205, 56937, 57154, 64750, 6498, 650, 658, 7041, 7046, 7048, 7050, 8091, 8312, 90
GO:0050839	cell adhesion molecule binding	GOMF	152	-0.0333429	0.812847	0.000499408	0.0095287	up in HPV(-)	10085, 1012, 10518, 11096, 11187, 1281, 1289, 1490, 2191, 2335, 26548, 3491, 3655, 3675, 3678, 3688, 3690, 3693, 3728, 3897, 3912, 3913, 4240, 4478, 53827, 55357, 57451, 57502, 5789, 5817, 5829, 63923, 6423, 7057, 7070, 7077, 7223, 7430, 83700, 87, 88, 8851, 977
GO:0004867	serine-type endopeptidase inhibitor activity	GOMF	64	-0.0470373	0.746531	0.00050959	0.00953234	up in HPV(-)	12, 128488, 1293, 135228, 183, 27344, 334, 340267, 351, 404203, 5045, 5054, 51232, 5266, 5268, 5270, 58189, 6690, 6695, 710, 8434, 871
GO:0022829	wide pore channel activity	GOMF	16	-0.0746561	0.62879	0.00053737	0.00985867	up in HPV(-)	10052, 10452, 24145, 2697, 2706, 2707, 56666, 57165
