# Supplementary material for: Subtypes of HPV-Positive Head and Neck Cancers Are Associated with HPV Characteristics, Copy Number Alterations, PIK3CA Mutation, and Pathway Signatures
Source: Oxford University Press journal article supplement (doi:10.1158/1078-0432.ccr-16-0323), 2016-04-18
Supplement: 10780432ccr160323-sup-159763_1_supp_3420021_94kl7h.docx [file 10780432ccr160323-sup-159763_1_supp_3420021_94kl7h.docx]

# Supplementary Methods and Figures

## Supplementary methods:

### RNA-seq analysis of the host gene expression

The RNA-seq library sizes ranged from 33 to 78 million reads (average of 47 million). The raw sequences were aligned to hg19 using Tophat2 v2.0.11(1) with default parameters, resulting in an alignment rate of 48%-92% (average 86%). Quality control was performed using FastQC(2) and RSeQC (3) before and after alignment. Gene expression levels were quantified using HTSeq v0.6.1p1 with the ‘intersection-strict’ option (4). Genes expressed at least 1 CPM in at least 10% of the samples were kept for downstream analysis. Normalization and differential expression testing were performed using the Bioconductor package edgeR v3.8.5 (edgeR-robust) (5,6), and adjustments for multiple testing were made using the standard False Discovery Rate approach.

### Measuring HPV gene expression, and detection of HPV subtypes and genic integration

The libraries were also aligned to HPV genomes (downloaded from NCBI) using rnaSTAR v2.3.0 (7) to allow gapped alignment over splicing junctions. We aligned to the HPV genomes of all high-risk types: 16, 18, 31, 33, 35, 39, 45, 51, 52, 56, 58, 59, 66 and 68. STAR first-pass alignment detected the most abundant splice junctions, which were then used in the second-pass alignment. All of the quantification and analyses below were based on the second-pass alignment. Samples were classified as HPV(+) if they had more than 500 read pairs aligned to any HPV genome, and HPV type was determined as the type which had the most reads aligned. No samples had between 50 and 1000 reads aligned to HPV, resulting in a very clear separation between HPV positive and HPV negative. Overall we identified 14 HPV type16, one type18, one type33, and two type35. Virus integration events resulting in HPV-host fusion transcripts were identified using VirusSeq (8) with the default parameters. A positive integration event was defined as having at least four discordant read pairs and at least one junction spanning read. A tumor sample was called genic integration positive if it contained at least one identified integration event.

HPV is a small genome with short oncogenes, therefore in order to optimize the comparability between UM data and TCGA data in terms of HPV gene expression and splicing, all UM libraries were trimmed to the first 48 base pairs (as 48bp was the length of the TCGA RNA-seq reads) for the alignment to HPV genomes. This was implemented after observing differences in the E6 transcript reads profile between cohorts when not trimming UM sample reads; the trimming removed these artefactual differences. HPV gene expression levels were represented in the form of “count per million (cpm) value”, which were calculated as the number of read pairs aligned to the HPV genome and intersected with each gene, and then divided by the total library size and multiplied by one million.

### Computing full-length E6 percentages

E6 is expressed in two main forms: (1) a full-length E6 isoform and (2) various spliced isoforms of E6, collectively referred to as E6*. We define full-length E6 percentage as the ratio of full-length E6 and all E6 transcripts. Because all E6* skip the first intron, we can compute full-length E6 percentage as the ratio of the average coverage level in the first intron (approximate full-length E6 level) divided by the average coverage level in the first exon (approximate all E6 transcript level). We used rnaSTAR to identify the first introns for E6*, which are, in the format of [donor-acceptor], [227-408], [234-415], [232-508] and [233-414] for type16, 18, 33 and 35, accordingly. The average coverage of read pairs within the intron (i.e. 227-408 for HPV-16) was then divided by the average coverage of read pairs within exon1 (i.e. 82-227 for HPV-16), where coverage was computed by dividing the number of reads by the feature width (Fig S3E).

### Finding unique pathways in each HPV(+) cluster

To understand how the pathways were dysregulated in the context of all UM HNC tumors, we ran edgeR and LRpath to find uniquely up- or down-regulated gene sets in each cluster (non-HPV, HPV-KRT and HPV-IMU). To do this, we constructed a model matrix for edgeR with three group labels: non-HPV, HPV-KRT and HPV-IMU, and then ran edgeR GLM with the contrast matrix (HPV-KRT vs non-HPV + HPV-IMU) to find genes uniquely up- or down-regulated in HPV-KRT (the same step is repeated on HPV-IMU). Finally, we ran LRpath directional test to identify significantly enriched pathways.

### Unsupervised clustering of gene expression values

Standard hierarchical clustering was performed on the median-centered log-transformed count per million (log-cpm) values. Genes used for clustering were chosen based on the following procedure. First, we calculated the rank of the variance and the rank of mean log-cpm for each gene analyzed. Then we used the rank difference between variance and mean to sort the gene list. Genes with a higher rank of variance than rank of the mean were considered more variable, to account for the strong mean-variance relationship. Different thresholds (top 5000 genes to all genes) were used to choose the gene list, but the clusters were robust to these differences, with at most one sample switching clusters. In addition, different distance measures (Euclidean distance, centered and uncentered correlation), linkages (complete, average and single) were also tested; again, the clusters were robust to the different parameters used. We also performed consensus clustering (9) using recommended parameters provided in the user manual, which produced the same clustering results. The final clusters reported were using genes with a positive rank difference (6922 genes), uncentered Pearson’s correlation and average linkage. The same clustering method was performed on UM+TCGA HPV(+) samples, using genes with a positive rank difference (6780 genes), uncentered Perason’s correlation and average linkage. The consensus clustering results are presented in Fig S1A,B.

### Pathway scores

Sample-wise pathway scores were calculated for four selected representative gene sets: E6 regulated genes, EMT genes, T-cell activation (GO: 0042110) and keratinocyte differentiation (GO: 0030216). E6 regulated genes were derived from table 1 in Duffy *et al* (10). EMT genes were cancer EMT markers defined in table 1 in Zeisberg *et al* (11). First, for each gene in the pathway, we ranked the samples according to their expression levels. For each sample, the ranks of the genes were summed, and the resulting values were then centered by mean and scaled by standard deviation across samples to give the final scores. For E6 negatively regulated genes, we ranked the expression levels in descending order, because the direction of regulation is known to be opposite.

### RNA-seq mutation calling

Pre-processing and variant calling were performed following GATK Best Practices for RNA-seq data (12) for identification of single nucleotide polymorphisms (SNPs) and small indels. Briefly, paired-end reads were aligned to the human genome using STAR v2.3.0(7). GATK v3.2-2 was used for indel realignment and base recalibration. Variants were called for each sample using HaplotypeCaller. Variants which fell under any of the following criteria were filtered out: quality scores less than 25 (QUAL<25), strong strand bias (FS > 30), normalized quality score (QD < 2.0), or variants part of a SNP cluster (defined as 2 SNPs within 35 bps) indicating a false positive. Resulting variants were filtered by SnpEff v4.0e (12) to retain variants predicted to disrupt the primary structure of the protein. Rare and damaging variants were identified using ANNOVAR (version released Nov12, 2014) (13). Rare variants were defined as variants that are present in less than 5% of 1000 Genomes (14) and NHLBI Exome Sequencing Project subjects (15). Damaging variants were those predicted to be damaging by either PolyPhen-2(16) or SIFT (17), stored in the ljb23 database.

RNA-seq variant calling has the limitation that it can only uncover expressed mutations that are greater than a certain coverage. For PIK3CA, showcased in the main text, all of the samples had an average coverage level that satisfied the minimum requirement (8X) to call variants.

A gene is denoted as mutated if it contains at least one predicted damaging mutation. Gene mutation percent in a group was defined as the percent of samples containing at least one mutated copy. The mutation percent was calculated for each subtype (HPV-KRT and HPV-IMU) in each cohort (UM and TCGA) separately.

1. Kim D, Pertea G, Trapnell C, Pimentel H, Kelley R, Salzberg SL. TopHat2: accurate alignment of transcriptomes in the presence of insertions, deletions and gene fusions. Genome Biol. 2013;14:R36.

2. Andrews S. FastQC A Quality Control tool for High Throughput Sequence Data. http://www.bioinformatics.babraham.ac.uk/projects/fastqc/. 2010.

3. Wang L, Wang S, Li W. RSeQC: quality control of RNA-seq experiments. Bioinformatics. 2012;28:2184–5.

4. Anders S, Pyl PT, Huber W. HTSeq A Python framework to work with high-throughput sequencing data. bioRxiv. 2014;31:002824.

5. Robinson MD, McCarthy DJ, Smyth GK. edgeR: a Bioconductor package for differential expression analysis of digital gene expression data. Bioinformatics. 2010;26:139–40.

6. Zhou X, Lindsay H, Robinson MD. Robustly detecting differential expression in RNA sequencing data using observation weights. Nucleic Acids Res. 2014;42:1–10.

7. Dobin A, Davis CA, Schlesinger F, Drenkow J, Zaleski C, Jha S, et al. STAR: ultrafast universal RNA-seq aligner. Bioinformatics. 2013;29:15–21.

8. Chen Y, Yao H, Thompson EJ, Tannir NM, Weinstein JN, Su X. VirusSeq: software to identify viruses and their integration sites using next-generation sequencing of human cancer tissue. Bioinformatics. 2013;29:266–7.

9. Monti S, Tamayo P, Mesirov J, Golub T. Consensus clustering: A resampling based method for class discovery and visualization of gene expression microarray data. Mach Learn. 2003;52:91–118.

10. Duffy CL, Phillips SL, Klingelhutz AJ. Microarray analysis identifies differentiation-associated genes regulated by human papillomavirus type 16 E6. Virology. 2003;314:196–205.

11. Zeisberg M, Neilson EG. Biomarkers for epithelial-mesenchymal transitions. J Clin Invest. 2009;119:1429–37.

12. DePristo MA, Banks E, Poplin R, Garimella K V, Maguire JR, Hartl C, et al. A framework for variation discovery and genotyping using next-generation DNA sequencing data. Nat Genet. 2011;43:491–8.

13. Wang K, Li M, Hakonarson H. ANNOVAR: functional annotation of genetic variants from high-throughput sequencing data. Nucleic Acids Res. 2010;38:e164.

14. McVean GA, Altshuler (Co-Chair) DM, Durbin (Co-Chair) RM, Abecasis GR, Bentley DR, Chakravarti A, et al. An integrated map of genetic variation from 1,092 human genomes. Nature. 2012;491:56–65.

15. Fu W, O’Connor TD, Jun G, Kang HM, Abecasis G, Leal SM, et al. Analysis of 6,515 exomes reveals the recent origin of most human protein-coding variants. Nature. 2012;493:216–20.

16. Adzhubei IA, Schmidt S, Peshkin L, Ramensky VE, Gerasimova A, Bork P, et al. A method and server for predicting damaging missense mutations. Nat Methods. 2010;7:248–9.

17. Pauline C. Ng and Steven Henikoff. SIFT: predicting amino acid changes that affect protein function. Nucleic Acids Res. 2003;31:3812–4.

## Supplementary Figures

**Figure S1. Focal amplification of chr11q13 and chr11q22 in HPV(-) tumors and far-end deletion of chr11q in HPV(+) tumors.** The top panel shows the gene expression fold changes (log transformed) between HPV(-) and HPV(+) samples. Up-regulated genes in HPV(-) tumors is colored in red and up-regulated in HPV(+) tumors is in blue. The bottom panel shows the CNA of the tumors (divided in the middle by HPV status).

**Figure S2. ConsensusCluster Plus output for (A) UM and (B) UM+TCGA HPV(+) samples.** (A, B) The left-most figures show the tree structure for the selected k (k is the number of clusters; k=3 for UM and k=2 for UM+TCGA). The second-to-the-left figures show the tree structure for k=(optimal K)+1. In both cases, the additional cluster only picks out trivial number of samples (one and five, respectively), providing strong evidence that the selected k is most appropriate. The 3rd figures (second to the right) show the consensus cumulative distribution function (CDF) for different k values, and the 4th (right-most) figures show the relative change in the area under CDF as k increases.

**Figure S3. Correlation of clusters with HPV characteristics.** (A,B,C) Boxplots of HPV E2, E4, E7 expression levels by subgroup. (D) Plot of the expression levels of E2/E4/E5, using color to represent viral genic integration status. Each gene is sorted across samples by its expression value from low to high. (E) Illustration of how full-length E6 percentage is calculated. R1 and R2 are the numbers of reads aligned to each interval. L1 and L2 are the lengths of the intervals. R2/L2 is an approximation of full-length E6 transcript abundance, whereas R1/L1 is an approximation of the abundance of all E6 isoform. Full-length E6 percentage is calculated as in the formula shown. (F) Boxplot showing the full-length E6 percentage by HPV type.

Table S1. Differentially expressed neoplasm-associated genes between HPV(+) and HPV(-) HNC tumors in the UM cohort.

Table S2. Enriched GO terms for genes differentially expressed between HPV(+) and HPV(-) HNC tumors in the UM cohort.

Table S3. Enriched GO terms for genes differentially expressed between HPV-KRT and HPV-IMU subgroups in the UM cohort.

Table S4. Neoplasm-associated genes on chr3q and chr16q (identified by gene2Mesh). The ‘logFC’, ‘p-value’ and ‘q-value’ columns are from testing the expression difference between HPV-KRT and HPV-IMU tumors (UM and TCGA combined).

Table S5. The list of genes displayed in Figure 1D.
